# Supplementary material
Source: PubMed Central journal article supplement (PMC10024084)
Supplement: mmc1.pdf [file mmc1.pdf]

# Supplemental Figure 1

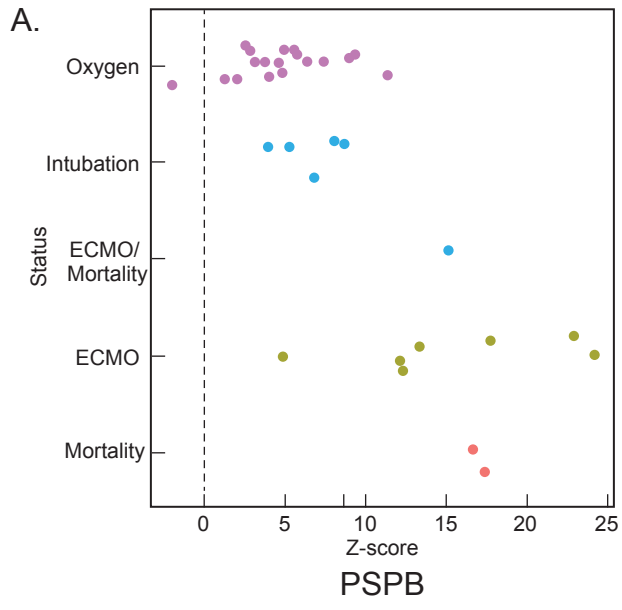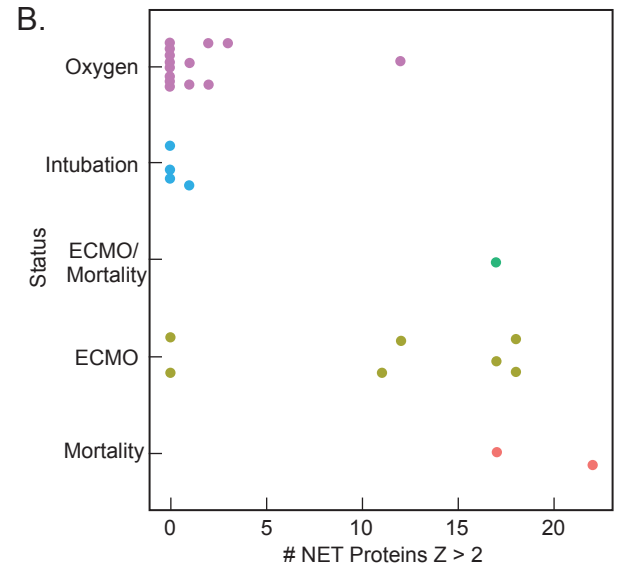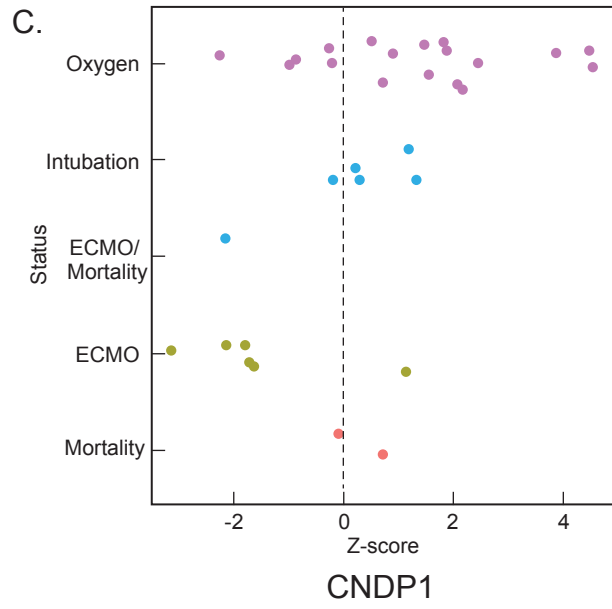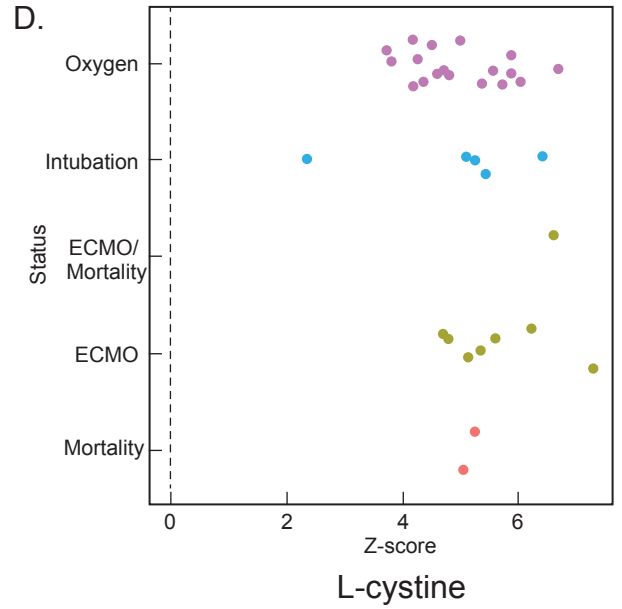

Supplemental  
Figure 2

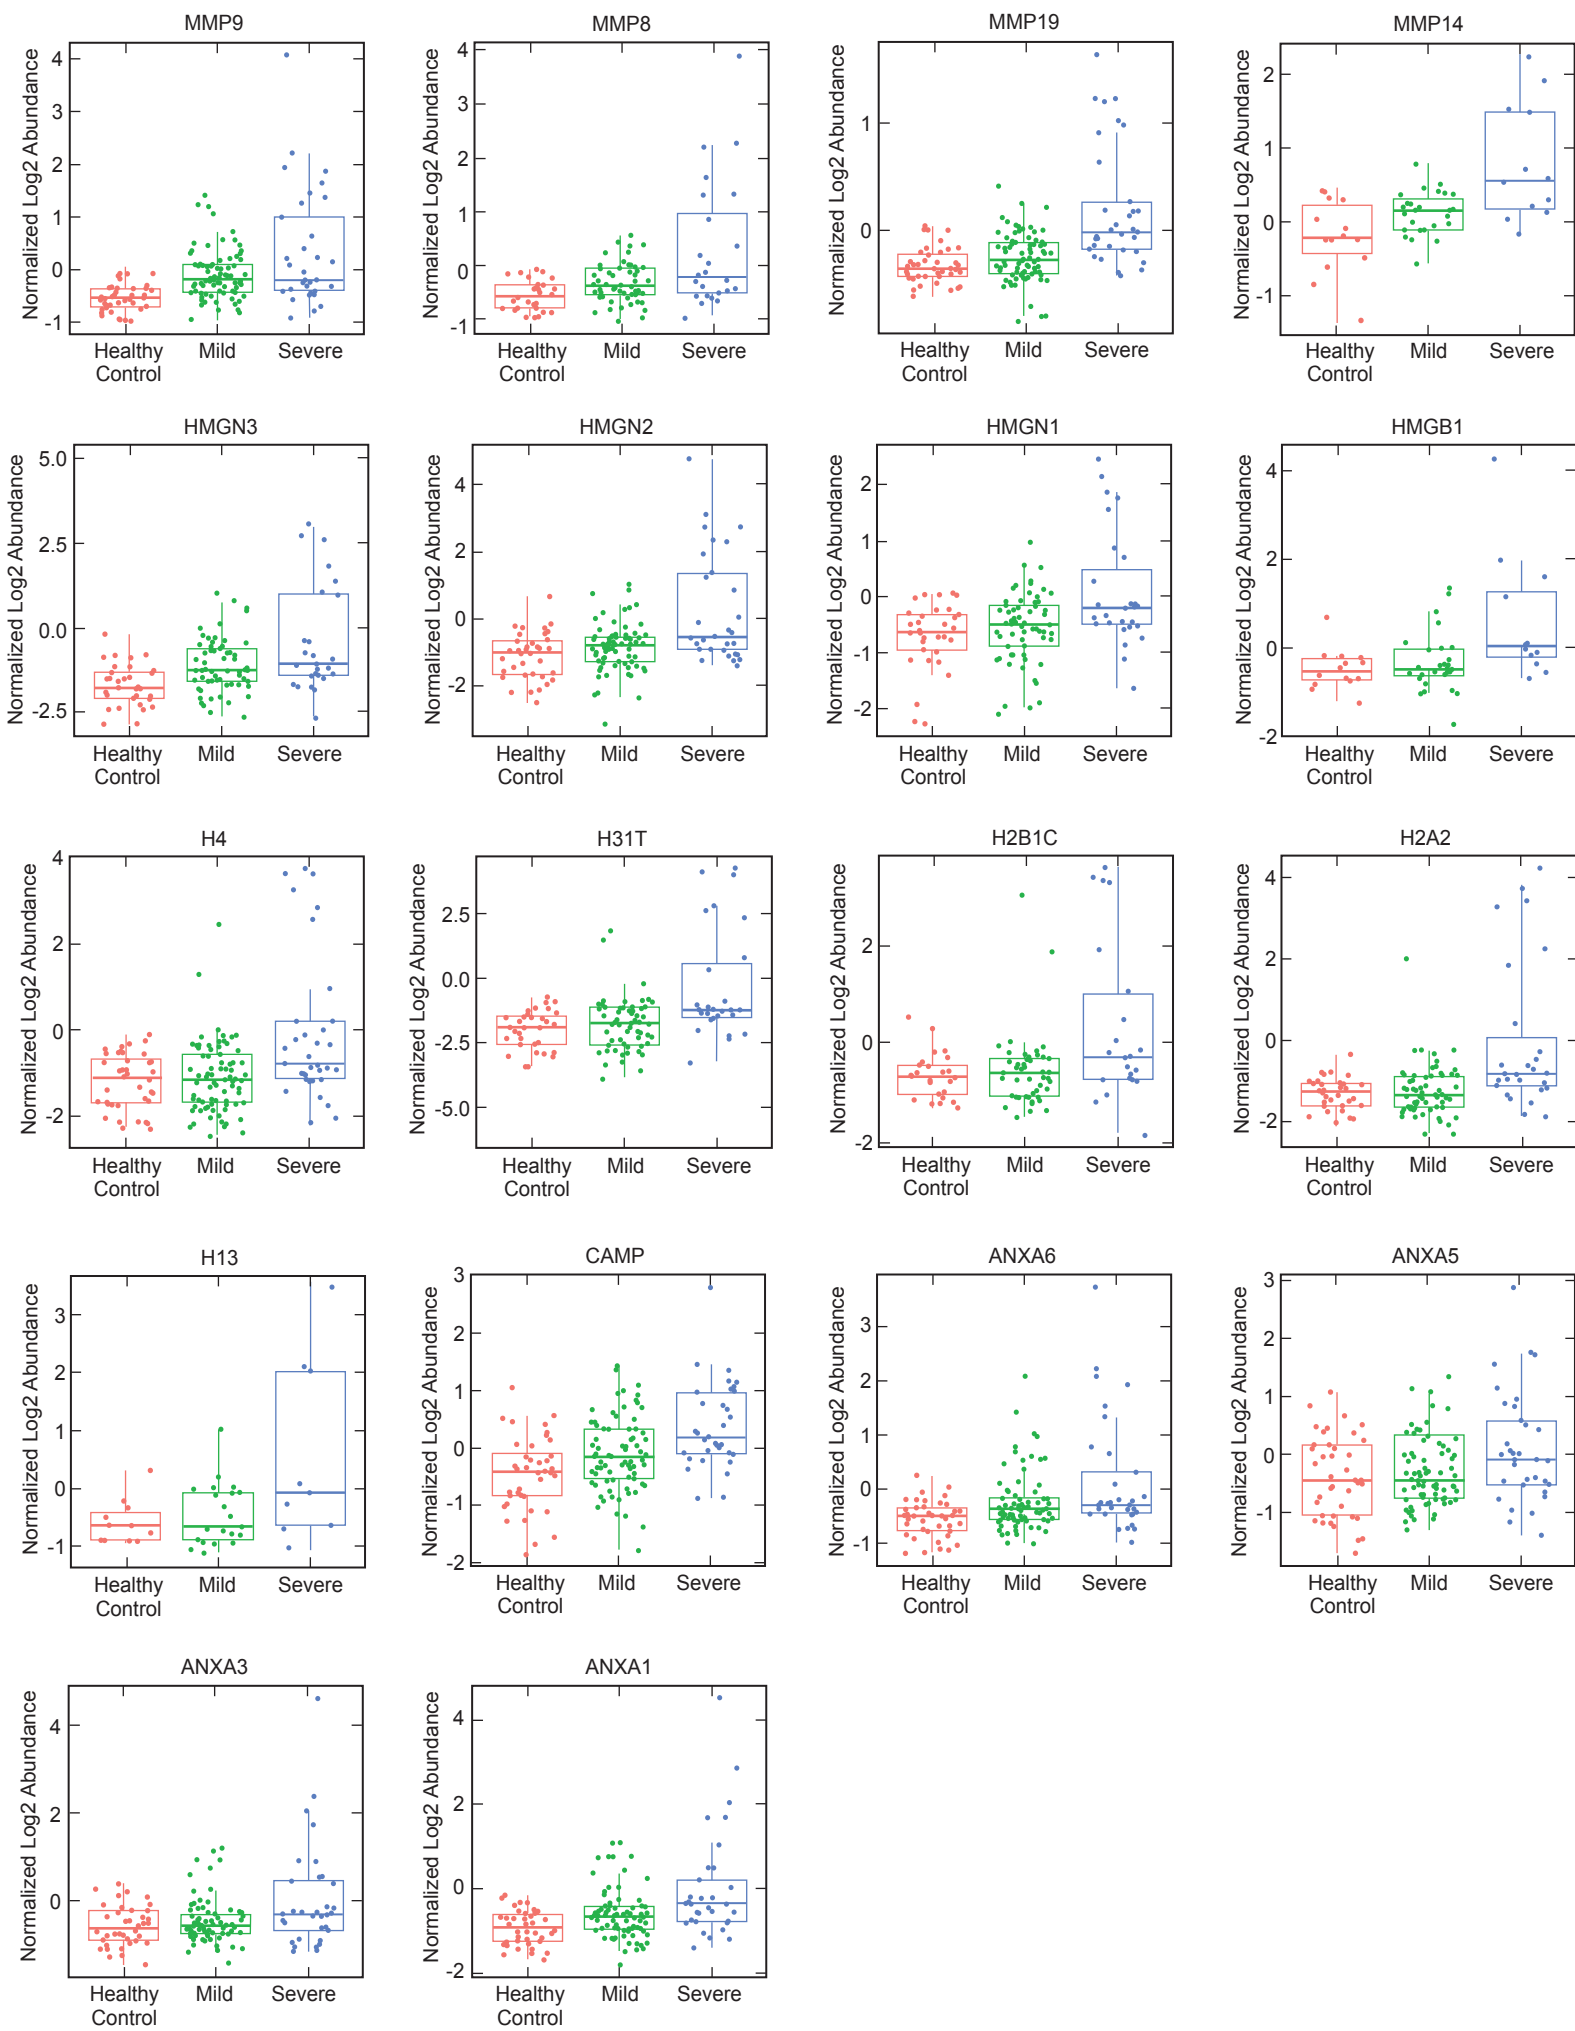

Supplemental Figure 3

Severe

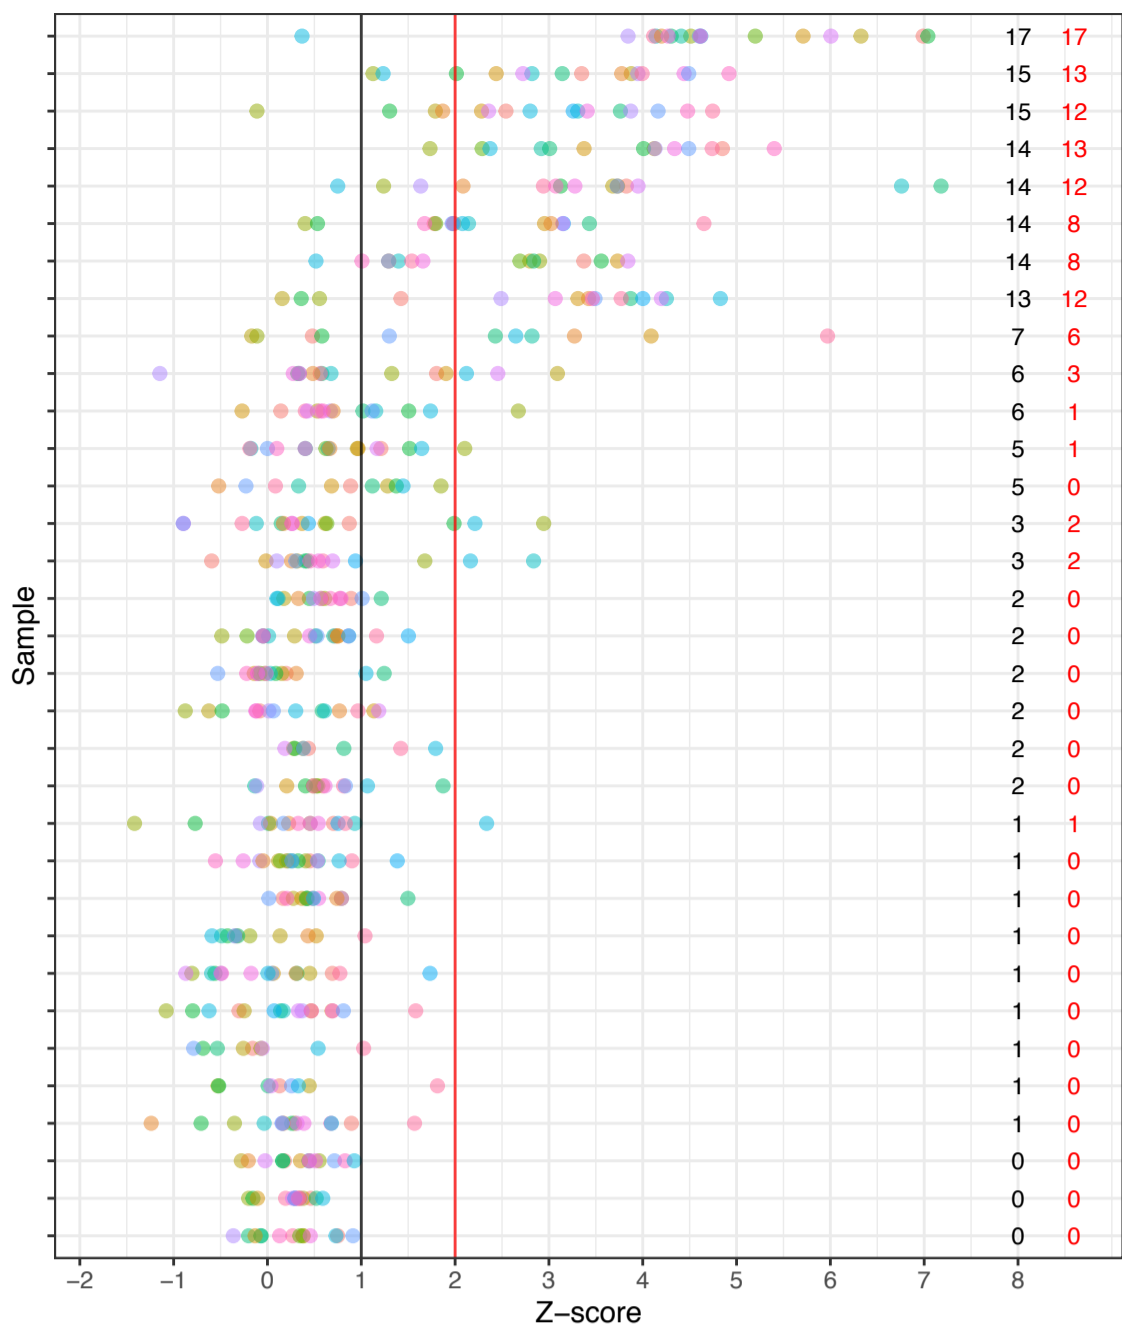

- Protein
- P04083
  - P05114
  - P05204
  - P08133
  - P08758
  - P09429
  - P12429
  - P14780
  - P16402
  - P22894
  - P49913
  - P50281
  - P62805
  - P62807
  - Q15651
  - Q16695
  - Q6F113
  - Q99542

Mild

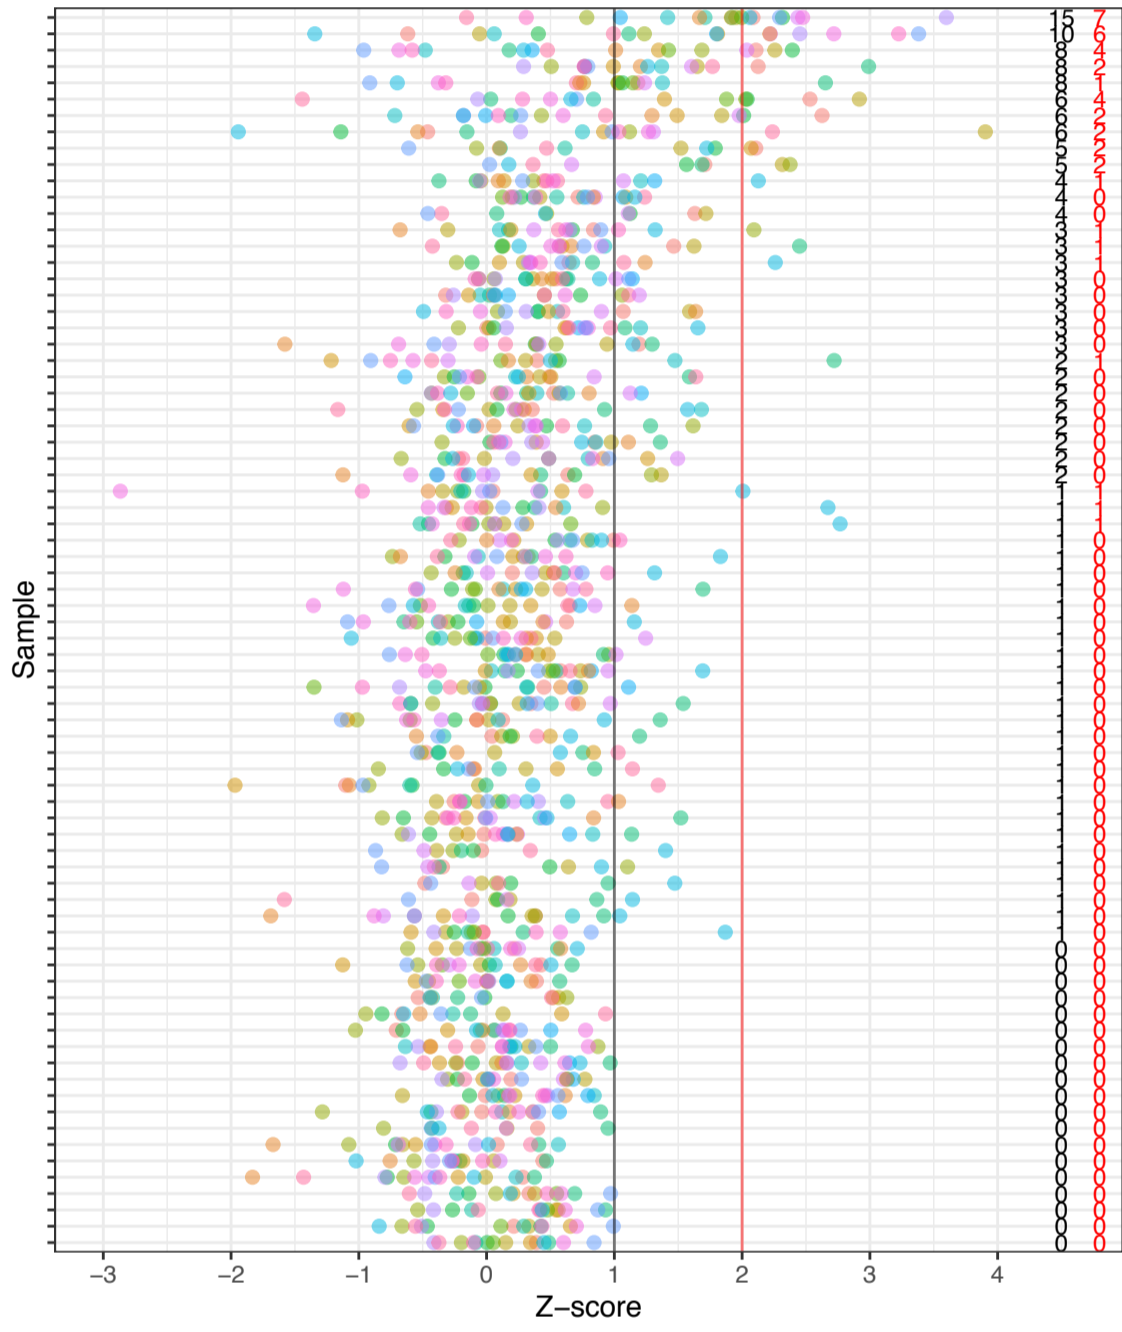

- Protein
- P04083
  - P05114
  - P05204
  - P08133
  - P08758
  - P09429
  - P12429
  - P14780
  - P16402
  - P22894
  - P49913
  - P50281
  - P62805
  - P62807
  - Q15651
  - Q16695
  - Q6F113
  - Q99542

Healthy Controls

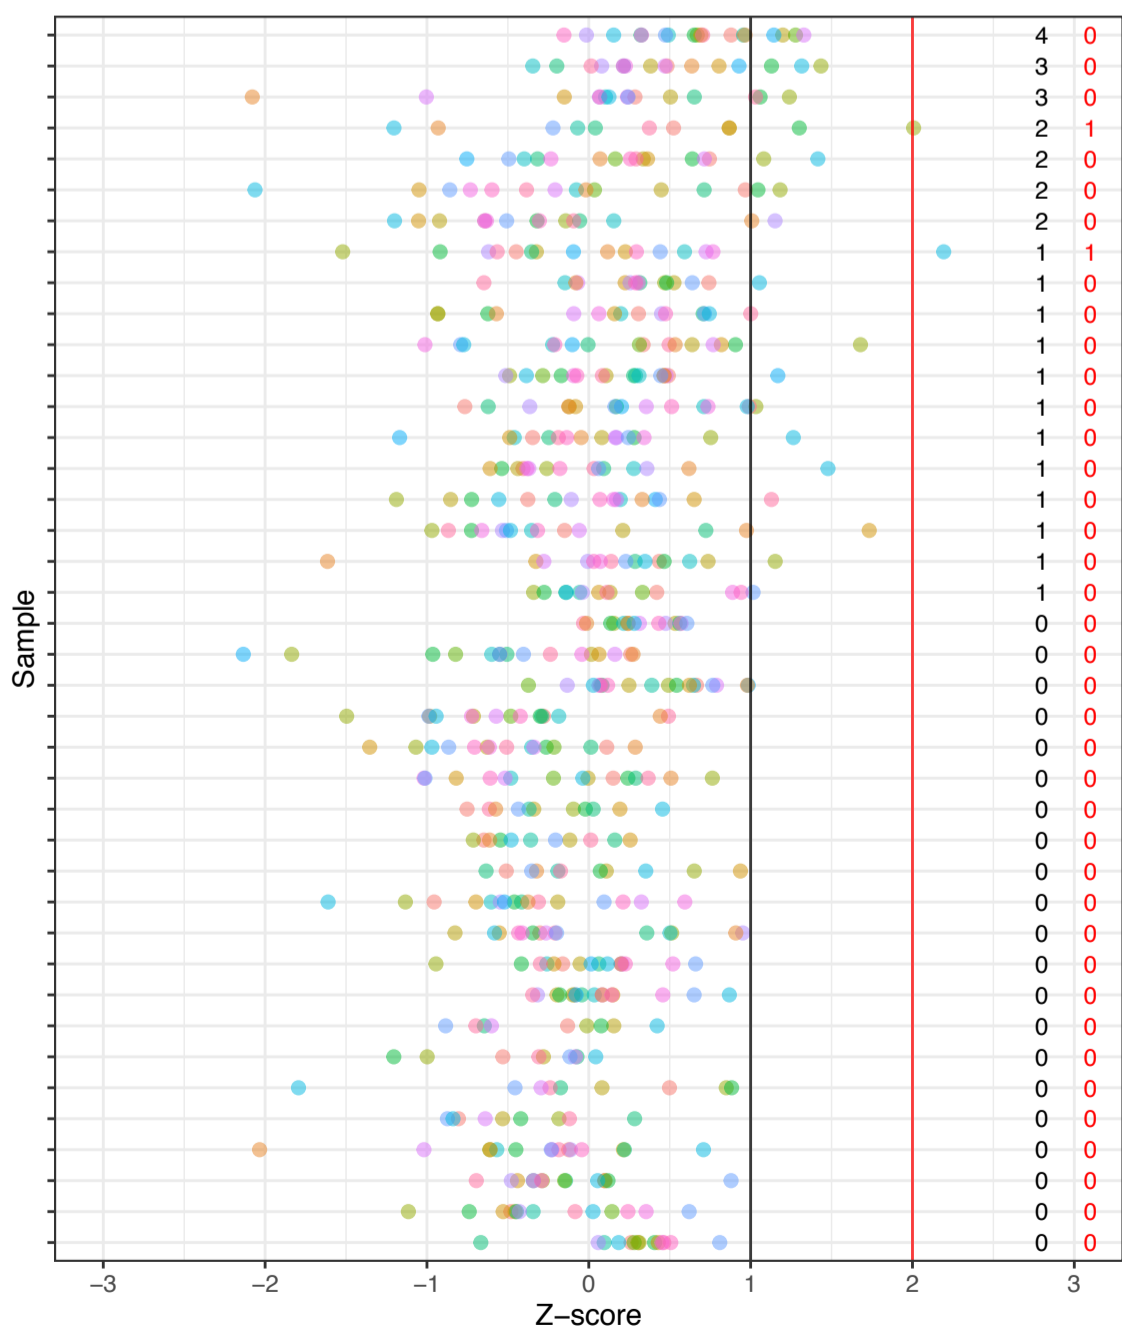

- Protein
- P04083
  - P05114
  - P05204
  - P08133
  - P08758
  - P09429
  - P12429
  - P14780
  - P16402
  - P22894
  - P49913
  - P50281
  - P62805
  - P62807
  - Q15651
  - Q16695
  - Q6F113
  - Q99542

# Supplemental Figure 4

**A.**

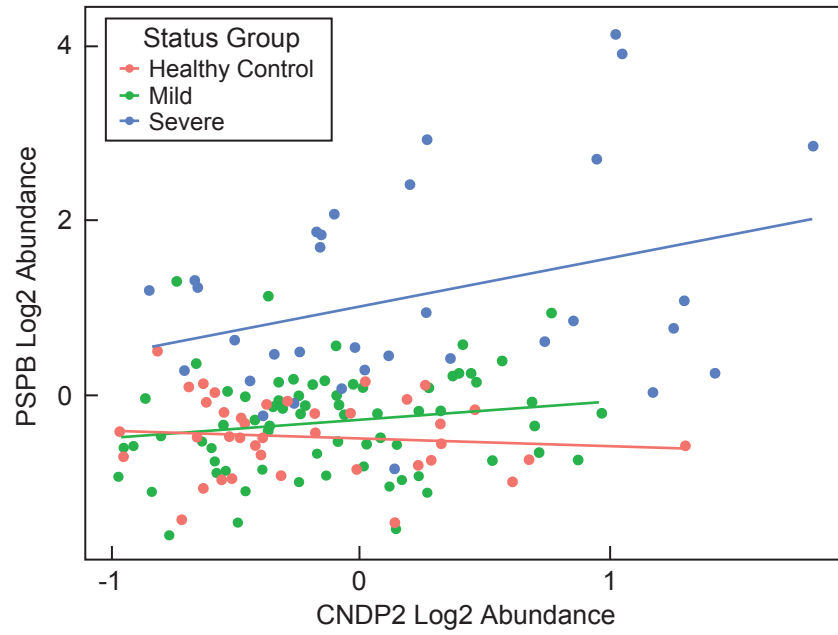

**B.**

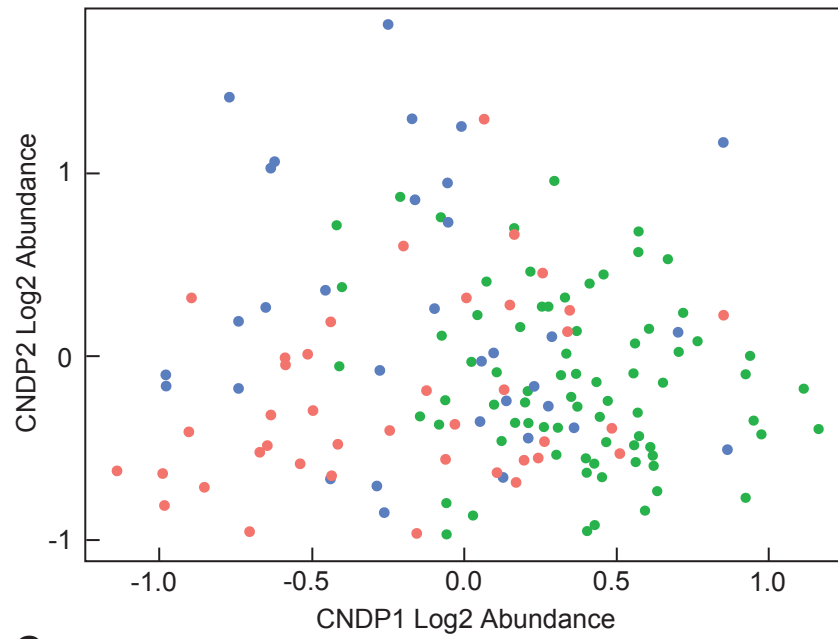

**C.**

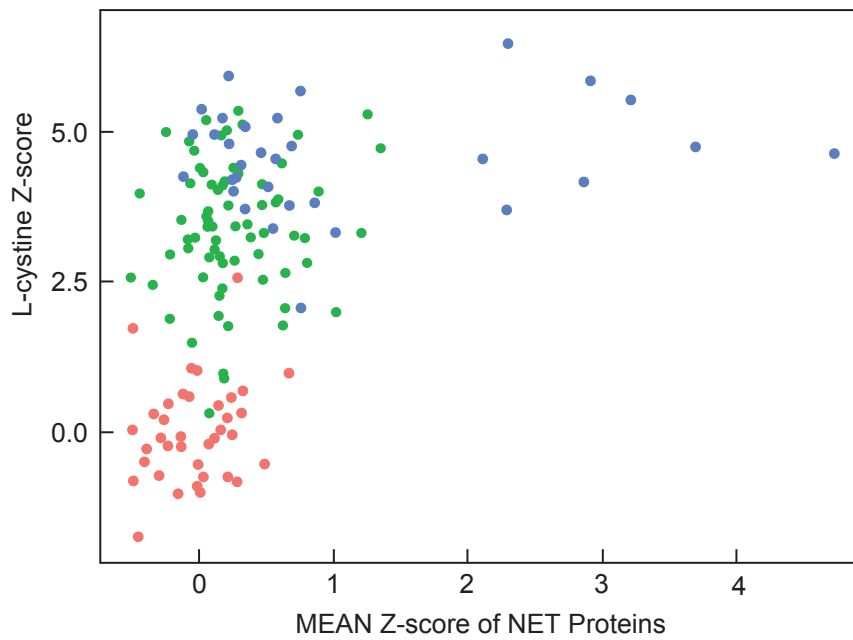

## Supplemental Figure 5

>sp|Q96KN2|CNDP1\_HUMAN Beta-Ala-His dipeptidase OS=Homo sapiens OX=9606 GN=CNDP1 PE=1 SV=4  
MDPKLGRMAASLLAVLLLLLLERGMFSS**SPSPPPALLEKVFQYIDLHQDEFVQTLKEWVAIESDSVQPVPRFRQELFRMMAVAADTLQRLGA**  
**RVASVDMGPQQLPDGQSLPI PPI ILAELGSDPTKGTVC FYGHLDVQPADRGDGWLTD PYVLTEVDGKLYGRGATDNKGPVLAWINAVSAF**  
**RALEQDLPVNIKFI IEGMEEAGSVALEELVEKEKDRFFSGVDYIVISDNLWISQRKPAITYGTRGNSYFMVEVKCRDQDFHSGTFGGILH**  
EPMADLVALLGSLVDSSGH**ILVPGIYDEVVPLTEEEINTYKAIHLDLEEYRNSSRVEKFLFDTKEEILMHLWRYP SLSIHGIEGAFDEPG**  
**TKTVIPGRVIGKFSIRLVP HMNVSAVEKQVTRHLEDVFSKRNS SNKMVVSMTLGLHPWIANIDDTQYLAAKRAIRTVFGTEPDMIRDGST**  
**IPIAKMFQEIVHKS VVLIPLGAVDDGEHSQNEKINRWNYIEGTKLFAAFFLEMAQLH**

>sp|Q96KP4|CNDP2\_HUMAN Cytosolic non-specific dipeptidase OS=Homo sapiens OX=9606 GN=CNDP2  
PE=1 SV=2  
MAALTTLFK**YIDENQDRYIKKLAKWVAIQSVSAWPEKRGEIRR MMEVAAADV KQLGGSVELVDIGKQKLPDGSEIPLPPILLGR**LGSDPQ  
KKTVCIYGHLDVQPAAL EDGWDSEPF TLVERD GKLYGRGSTDDKGPVAGWINALEAYQK**TGQEI PVNVR**FCLEGMEESGSEGLDELIFAR  
KDTFFK**DVDYVCI SDNYWLGK**KKPCITYGLRGICYFFIEVECSNKDLHSGVYGGSVHEAMTDLILLMGS LVDKRGNILIPGINEAAVAVT  
EEHKLYDDIDFDIEEFAK**DVGAQILLHSHK**KDILMHRWRYP SLSLHGIEGAFSGSGAKTVIPRKVVGKFSIRLVPNMTPEVVGEQVTSY  
LTKKFAELRSPNEFK**VYMGHGK**PWVSDFSHPHYLAGRRAMK**TVFGVEPDLTREGGSI PVTTLTFQEATGK**NVMLLPVGSADDGAHSQNEK  
LNRNYIEGTK**MLAAYLYEVSQ**LKD

# Supplemental Figure 6

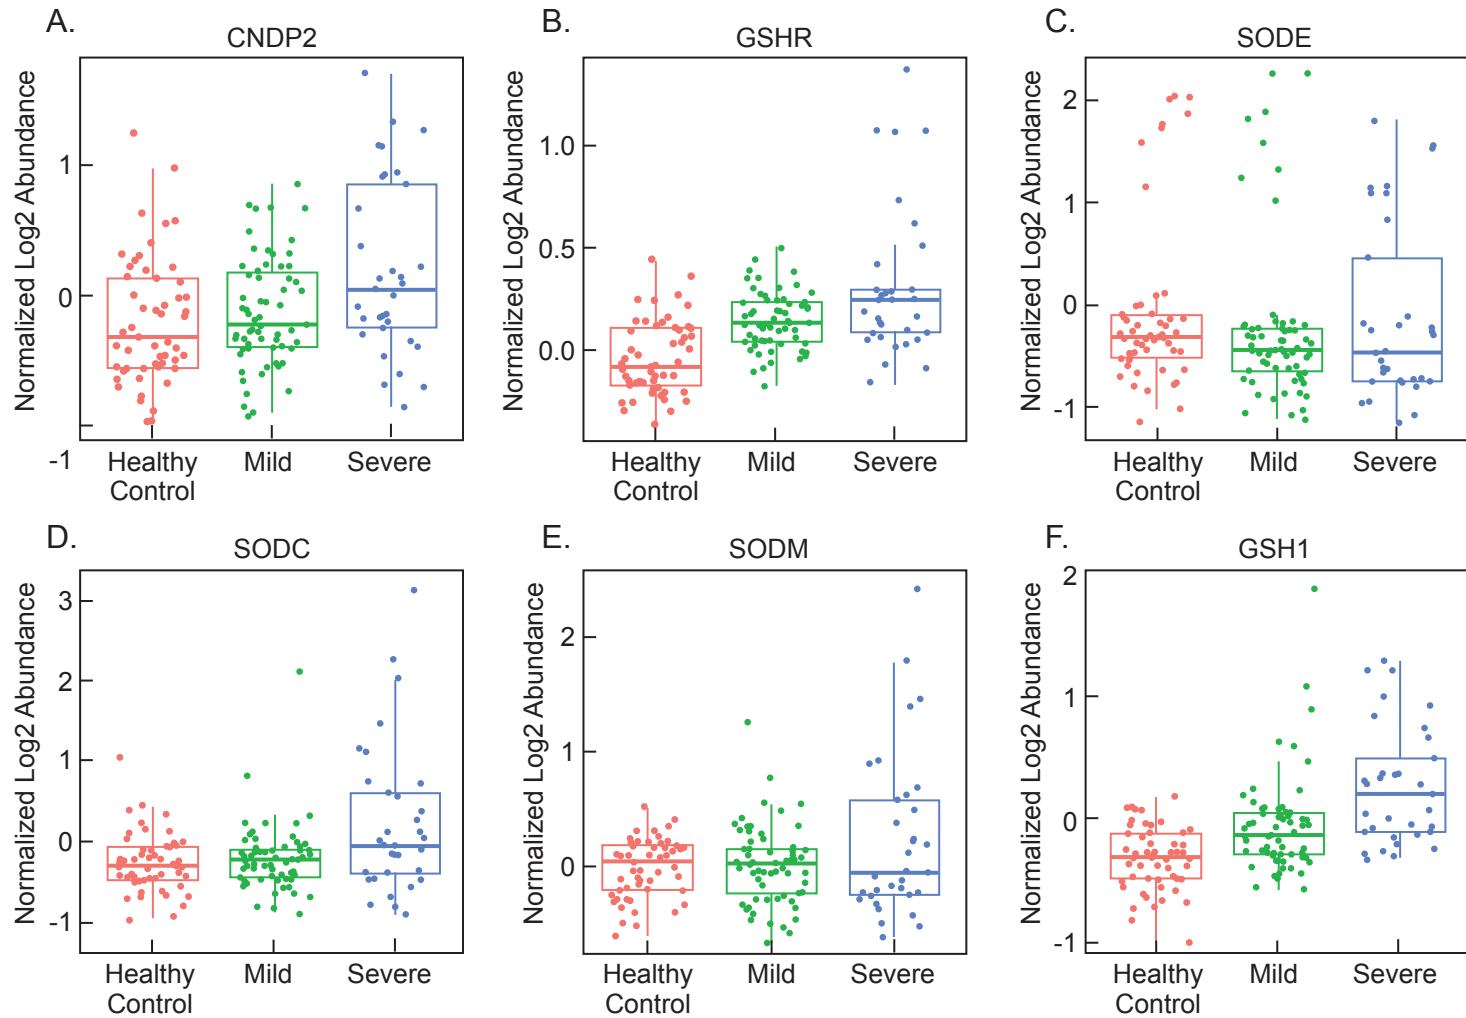

# Supplemental Table I:

| Protein                   | N_Peptides | N_HC | N_Mild | N_Severe | Mean_HC  | Mean_Mild    | Mean_Severe  | Log2FC_MvsHC | Log2FC_SvsHC | Log2FC_SvsM  | Adj_Pvalue_MvsHC | Adj_Pvalue_SvsHC | Adj_Pvalue_SvsM |
|---------------------------|------------|------|--------|----------|----------|--------------|--------------|--------------|--------------|--------------|------------------|------------------|-----------------|
| sp O15144 ARPC2_HUMAN     | 1          | 40   | 76     | 33       | -0.02259 | -0.06989545  | 0.20023523   | -0.047303905 | 0.222826775  | 0.27013068   | 0.884546227      | 0.158120539      | 0.033549362     |
| sp Q99460 PSMD1_HUMAN     | 2          | 8    | 14     | 6        | -0.11791 | 0.131884021  | 0.196822009  | 0.249796968  | 0.314734955  | 0.064937988  | 0.686891423      | 0.669587503      | 0.978954397     |
| sp O75882 ATR_N_HUMAN     | 1          | 40   | 76     | 33       | 0.307815 | 0.192497743  | 0.05280914   | -0.115317339 | -0.282005942 | -0.166688603 | 0.000526847      | 3.15E-12         | 1.92E-06        |
| sp P05976 MYL1_HUMAN      | 2          | 40   | 76     | 33       | -2.04317 | -2.246505281 | -1.624210698 | -0.203333813 | 0.418960771  | 0.622294583  | 0.480489268      | 0.120498268      | 0.003249631     |
| sp Q9NZP8 C1RL_HUMAN      | 2          | 40   | 76     | 33       | 0.183327 | 0.296293903  | 0.224965777  | 0.112967172  | 0.041639046  | -0.071328125 | 0.003708868      | 0.575604385      | 0.131255072     |
| sp P05155 IC1_HUMAN       | 2          | 40   | 76     | 33       | 0.514166 | 0.480501436  | 0.604067741  | -0.033664368 | 0.089901937  | 0.123566305  | 0.82524314       | 0.391527087      | 0.108174834     |
| sp P08697 AZAP_HUMAN      | 2          | 40   | 76     | 33       | 0.346401 | 0.310272943  | 0.093929984  | -0.036128008 | -0.252470968 | -0.216342959 | 0.31677939       | 1.30E-13         | 4.87E-13        |
| sp Q8N91 ANGL6_HUMAN      | 1          | 40   | 76     | 33       | 0.061497 | 0.142930088  | -0.094752306 | 0.081433506  | -0.156248889 | -0.237682395 | 0.045414239      | 0.000541769      | 2.33E-09        |
| sp P02765 FETUA_HUMAN     | 36         | 40   | 76     | 33       | 0.522453 | 0.459110354  | 0.094100381  | -0.06342935  | -0.428352908 | -0.365009973 | 0.30702339       | 2.65E-13         | 1.42E-12        |
| sp PCOL5 C04B_HUMAN       | 3          | 40   | 76     | 33       | 0.324434 | 0.375437291  | 0.249424753  | 0.051003073  | -0.079509464 | -0.130512538 | 0.565479717      | 0.385950352      | 0.00419814      |
| sp P19971 TYPH_HUMAN      | 2          | 40   | 76     | 33       | -0.19728 | -0.064090235 | 0.266718914  | 0.133187548  | 0.463996698  | 0.33080915   | 0.308394405      | 0.000110372      | 0.002322349     |
| sp P04217 A1BG_HUMAN      | 1          | 40   | 76     | 33       | 0.545594 | 0.513808348  | 0.407083746  | -0.032513941 | -0.138510543 | -0.105996601 | 0.348069992      | 6.77E-06         | 0.000111899     |
| sp P01008 ANT3_HUMAN      | 4          | 40   | 76     | 33       | 0.483673 | 0.419441126  | 0.152338465  | -0.064231988 | -0.331346448 | -0.26710266  | 0.107486331      | 5.64E-14         | 1.61E-12        |
| sp P05154 IPSP_HUMAN      | 6          | 40   | 76     | 33       | 0.266019 | 0.008342897  | -0.073441734 | -0.257675996 | -0.339460627 | -0.081784631 | 0.053178004      | 0.030390871      | 0.765790244     |
| sp P05543 THBG_HUMAN      | 1          | 40   | 76     | 33       | 0.279287 | 0.270144321  | 0.0098842    | -0.009142869 | -0.26940299  | -0.260260121 | 0.969332834      | 1.08E-07         | 8.07E-09        |
| sp P36955 PEDF_HUMAN      | 2          | 40   | 76     | 33       | 0.318915 | 0.28045577   | 0.32161474   | -0.038458994 | 0.002699976  | 0.04115897   | 0.467593663      | 0.997397407      | 0.465628761     |
| sp P00734 THRB_HUMAN      | 4          | 40   | 76     | 33       | 0.279823 | 0.248218247  | 0.007346056  | -0.031604851 | -0.272477042 | -0.240872191 | 0.464394979      | 1.08E-13         | 1.18E-13        |
| sp P07357 CO8A_HUMAN      | 7          | 40   | 76     | 33       | 0.507877 | 0.480397854  | 0.404315724  | -0.027479207 | -0.103561336 | -0.07608213  | 0.628664363      | 0.012659583      | 0.047778113     |
| sp Q9Y67 FCGBP_HUMAN      | 5          | 40   | 76     | 33       | 0.138323 | 0.220596563  | 0.447576704  | 0.082273767  | 0.309253908  | 0.269801441  | 0.274749258      | 1.10E-05         | 0.000312078     |
| sp Q2V718 MST1L_HUMAN     | 11         | 40   | 76     | 33       | 0.15427  | 0.196031405  | 0.031882211  | 0.04176125   | -0.122387944 | -0.164149194 | 0.258062595      | 0.000527314      | 1.10E-07        |
| sp P04050 CERU_HUMAN      | 1          | 40   | 76     | 33       | 0.479359 | 0.518844654  | 0.384616701  | 0.039485218  | -0.094742735 | -0.134227954 | 0.562410496      | 0.105765613      | 0.003884347     |
| sp P09668 CATH_HUMAN      | 2          | 40   | 76     | 33       | -0.09716 | 0.070885582  | 0.121576627  | 0.16804075   | 0.21873175   | 0.050691045  | 0.010794664      | 0.000124021      | 0.685491849     |
| sp P00918 CAH2_HUMAN      | 2          | 40   | 76     | 33       | -0.23811 | 0.01430173   | 0.38264692   | 0.252412759  | 0.620757949  | 0.36834519   | 0.029359064      | 1.48E-06         | 0.001641871     |
| sp P62528 I433E_HUMAN     | 2          | 40   | 76     | 33       | -0.08382 | -0.138649778 | 0.347601151  | -0.054832939 | 0.43141799   | 0.486250929  | 0.857869947      | 0.002112534      | 6.52E-05        |
| sp P02671 FIBA_HUMAN      | 2          | 40   | 76     | 33       | 0.135583 | 0.28042221   | 0.599116108  | 0.14483939   | 0.463532888  | 0.138693897  | 0.131792411      | 2.46E-06         | 0.000299489     |
| sp Q14624 ITH4_HUMAN      | 4          | 40   | 76     | 33       | 0.65837  | 0.674030345  | 0.668827681  | 0.015660468  | 0.008457803  | -0.007202665 | 0.884556131      | 0.97589431       | 0.977451359     |
| sp P08123 CO1A2_HUMAN     | 3          | 40   | 76     | 33       | -0.01324 | -0.038838481 | 0.310930369  | -0.22559618  | 0.32417267   | 0.34976885   | 0.912115741      | 9.21E-05         | 1.70E-06        |
| sp P03952 KLKB1_HUMAN     | 6          | 40   | 76     | 33       | 0.503356 | 0.471927505  | 0.383779574  | -0.031428425 | -0.319576356 | -0.288147931 | 0.748631284      | 2.38E-08         | 1.38E-08        |
| sp P00751 CFA8_HUMAN      | 4          | 40   | 76     | 33       | 0.236259 | 0.29120378   | 0.234919116  | 0.054944655  | -0.001340009 | -0.056284665 | 0.340552262      | 0.999552936      | 0.370344308     |
| sp P00748 FA12_HUMAN      | 2          | 40   | 76     | 33       | 0.231376 | 0.271177443  | 0.004988407  | 0.039801727  | -0.236364123 | -0.27616585  | 0.759715504      | 0.001853044      | 2.73E-05        |
| sp P00742 FA10_HUMAN      | 3          | 40   | 76     | 33       | 0.218106 | 0.235792075  | 0.156493905  | 0.0176859    | -0.06161227  | -0.07929817  | 0.814997123      | 0.185187289      | 0.03051772      |
| sp P00740 FA9_HUMAN       | 22         | 40   | 76     | 33       | 0.249501 | 0.260068143  | 0.294564302  | 0.01056695   | 0.045063109  | 0.034496159  | 0.909627851      | 0.308821758      | 0.415238237     |
| sp P02751 FINC_HUMAN      | 3          | 40   | 76     | 33       | 0.625746 | 0.790995647  | 0.825774037  | 0.165249927  | 0.200028316  | 0.03477839   | 0.161461633      | 0.58280195       | 0.932099472     |
| sp P06396 GELS_HUMAN      | 5          | 40   | 76     | 33       | 0.522895 | 0.372026377  | -0.003807242 | -0.150868314 | -0.526701934 | -0.37583362  | 0.012312934      | 1.63E-13         | 1.01E-09        |
| sp P15291 B4G1T_HUMAN     | 1          | 40   | 76     | 33       | 0.009626 | 0.052458421  | 0.451220814  | 0.042831997  | 0.44159439   | 0.398762393  | 0.820356141      | 2.61E-06         | 1.70E-06        |
| sp P19827 ITH1_HUMAN      | 57         | 40   | 76     | 33       | 0.625391 | 0.53613162   | 0.292288999  | -0.089259218 | -0.33310184  | -0.243842621 | 0.01794115       | 8.62E-14         | 1.89E-10        |
| sp Q15063 POSTN_HUMAN     | 5          | 40   | 76     | 33       | 0.16417  | 0.117024309  | 0.122426851  | -0.0471452   | -0.041742658 | 0.005402542  | 0.811372998      | 0.892989916      | 0.997578612     |
| sp O00391 QSOX1_HUMAN     | 4          | 40   | 76     | 33       | 0.116624 | 0.093020507  | 0.134055549  | -0.026321437 | 0.018431605  | 0.044753042  | 0.698653079      | 0.885472491      | 0.404581179     |
| sp P04114 APOB_HUMAN      | 2          | 40   | 76     | 33       | 0.764763 | 0.593495285  | 0.6454518911 | -0.171268201 | -0.120244575 | 0.051023626  | 5.11E-06         | 0.011626374      | 0.34158575      |
| sp P22792 CPN2_HUMAN      | 5          | 40   | 76     | 33       | 0.275923 | 0.261397545  | 0.1685504    | -0.014525886 | -0.10737303  | -0.092847145 | 0.884534912      | 0.011979902      | 0.014721229     |
| sp Q04756 HGFA_HUMAN      | 7          | 40   | 76     | 33       | 0.327763 | 0.24824213   | -0.013154084 | -0.079521164 | -0.340917378 | -0.261396214 | 0.174192042      | 5.99E-09         | 4.21E-07        |
| sp P02766 TTHY_HUMAN      | 4          | 40   | 76     | 33       | 0.285327 | -0.078269826 | -0.203788827 | -0.363597196 | -0.489116197 | -0.125519001 | 6.68E-07         | 3.08E-08         | 0.187374208     |
| sp Q15582 BGH3_HUMAN      | 17         | 40   | 76     | 33       | 0.196206 | 0.237746952  | 0.155471904  | 0.041540528  | -0.040734521 | -0.082275049 | 0.707724296      | 0.948163646      | 0.30723364      |
| sp P15144 AMPN_HUMAN      | 15         | 40   | 76     | 33       | 0.097444 | 0.122107804  | 0.089799532  | 0.024663599  | -0.007644673 | -0.032308272 | 0.788024599      | 0.984259227      | 0.698756887     |
| sp Q96095 PGRP2_HUMAN     | 95         | 40   | 76     | 33       | 0.468645 | 0.336146306  | 0.322219974  | -0.132499165 | -0.436425497 | -0.30926332  | 0.017971025      | 1.36E-11         | 6.43E-08        |
| sp P11047 LAMC1_HUMAN     | 3          | 40   | 76     | 33       | -0.07942 | -0.064538859 | 0.36251723   | 0.014885473  | 0.441676055  | 0.426790582  | 0.978996022      | 9.84E-06         | 1.42E-06        |
| sp P02655 APOC2_HUMAN     | 1          | 40   | 76     | 33       | -0.10338 | -0.255339291 | 0.181230468  | -0.151955475 | 0.284614284  | 0.436569759  | 0.446702006      | 0.14546601       | 0.003831977     |
| sp P01019 ANGT_HUMAN      | 23         | 40   | 76     | 33       | 0.209328 | 0.220829991  | 0.123063076  | 0.101501634  | -0.08626528  | -0.097766914 | 0.97639101       | 0.047622709      | 0.232675296     |
| sp P10619 PPGB_HUMAN      | 2          | 40   | 76     | 33       | 0.003333 | 0.117193034  | 0.39899218   | 0.113859851  | 0.395657035  | 0.281797184  | 0.282591261      | 6.15E-05         | 0.001578439     |
| sp P41222 PTGDS_HUMAN     | 12         | 40   | 76     | 33       | 0.007307 | -0.02519492  | 0.44469488   | -0.032501893 | 0.337162515  | 0.369664407  | 0.002452923      | 0.002145293      | 0.000114912     |
| sp Q9UM47 NOTC3_HUMAN     | 12         | 40   | 76     | 33       | 0.116058 | 0.036273832  | 0.20083903   | -0.079784309 | 0.084780889  | 0.164565198  | 0.174861681      | 0.255641092      | 0.001974784     |
| sp P02774 VTDB_HUMAN      | 32         | 40   | 76     | 33       | 0.7797   | 0.777676996  | 0.558558683  | -0.002022528 | -0.221140841 | -0.219118312 | 0.997911497      | 3.19E-07         | 1.27E-08        |
| sp Q94985 CSTN1_HUMAN     | 43         | 40   | 76     | 33       | 0.174248 | 0.123637023  | -0.074112735 | -0.050610882 | -0.248360664 | -0.197749758 | 0.178577228      | 5.99E-11         | 3.04E-09        |
| sp Q43827 ANGLT_HUMAN     | 1          | 33   | 62     | 27       | -0.00785 | -0.042841294 | -0.230260532 | -0.034994054 | -0.222413292 | -0.187419238 | 0.844301465      | 0.011346637      | 0.017453082     |
| sp Q16610 ECM1_HUMAN      | 11         | 40   | 76     | 33       | 0.298802 | 0.258875681  | 0.083662517  | -0.039926576 | -0.21513974  | -0.175213165 | 0.683638502      | 0.00080924       | 0.002312339     |
| sp P10643 CO7_HUMAN       | 1          | 40   | 76     | 33       | 0.220765 | 0.187521107  | 0.284261797  | -0.033243508 | 0.063497181  | 0.09674069   | 0.752402075      | 0.490238103      | 0.125472078     |
| sp P0D0Y3 IGLC3_HUMAN     | 1          | 40   | 76     | 33       | -0.11017 | -0.02962129  | 0.270139853  | 0.080549902  | 0.380311045  | 0.299761143  | 0.626220882      | 0.00466706       | 0.004466706     |
| sp A0A0C4DH67 KV108_HUMAN | 79         | 40   | 76     | 33       | 0.072986 | -0.068703187 | -0.095495275 | -0.141689306 | -0.168481393 | -0.026792088 | 0.451570564      | 0.460348447      | 0.975105332     |
| sp P35968 VGFPR2_HUMAN    | 6          | 40   | 76     | 33       | 0.006248 | 0.052659445  | -0.096338148 | 0.046411168  | -0.102586425 | -0.148997593 | 0.3867051        | 0.00330702       | 0.00330702      |
| sp P01042 KNG1_HUMAN      | 2          | 40   | 76     | 33       | 0.325089 | 0.337270891  | 0.195915881  | 0.012181968  | -0.129173022 | -0.141355011 | 0.899606337      | 0.000475246      | 1.26E-05        |
| sp P35443 TSP4_HUMAN      | 8          | 40   | 76     | 33       | 0.052356 | 0.163083237  | 0.126440982  | 0.110727623  | 0.074085369  | -0.036642254 | 0.386859274      | 0.74423263       | 0.911970175     |
| sp P02649 APOE_HUMAN      | 2          | 40   | 76     | 33       | -0.04666 | 0.062792736  | 0.380080261  | 0.109450463  | 0.426737988  | 0.317287255  | 0.14251574       | 2.10E-08         | 2.38E-06        |
| sp Q70515 FCGB3_HUMAN     | 3          | 40   | 76     | 33       | -0.10371 | 0.060623943  | 0.170453655  | 0.164338234  | 0.274167946  | 0.109829712  | 0.143176778      | 0.025453207      | 0.4622535368    |
| sp Q9Y490 TLN1_HUMAN      | 5          | 40   | 76     | 33       | -0.05974 | -0.023726581 | 0.199546356  | 0.036009732  | 0.259282669  | 0.223272937  | 0.968686862      | 0.324687269      | 0.345722001     |
| sp P35858 ALS_HUMAN       | 10         | 40   | 76     | 33       | 0.3977   | 0.059655567  | -0.030986087 | 0.04826555   |              |              |                  |                  |                 |

|                           |    |      |    |    |          |              |              |              |              |              |             |             |              |
|---------------------------|----|------|----|----|----------|--------------|--------------|--------------|--------------|--------------|-------------|-------------|--------------|
| sp Q96GW7 PGCB_HUMAN      | 8  | 19   | 34 | 15 | 0.142379 | 0.045962672  | 0.297592569  | -0.096416448 | 0.155213449  | 0.251629897  | 0.632457668 | 0.44441364  | 0.077305113  |
| sp P23142 FBLN1_HUMAN     | 2  | 40   | 76 | 33 | 0.171948 | 0.131944157  | 0.189187651  | -0.040003496 | 0.017239998  | 0.057243494  | 0.560052504 | 0.928028662 | 0.354448728  |
| sp P08108 PHLD_HUMAN      | 11 | 40   | 76 | 33 | 0.224388 | 0.191833991  | 0.10829548   | -0.032554763 | -0.213587663 | -0.181004396 | 0.873921795 | 0.021277925 | 0.029284466  |
| sp P01720 PF4V_HUMAN      | 3  | 40   | 76 | 33 | -0.20378 | 0.094783359  | 0.113452321  | 0.298564675  | 0.317233636  | 0.018668692  | 0.008776218 | 0.042082147 | 0.983077694  |
| sp P04155 TFF1_HUMAN      | 16 | 18   | 34 | 16 | -0.01114 | -0.020211569 | 0.18852687   | -0.009071029 | 0.19966714   | 0.208738439  | 0.983626213 | 0.56811451  | 0.453693795  |
| sp P02656 APOC3_HUMAN     | 5  | 40   | 76 | 33 | 0.221771 | 0.162782576  | 0.4740876    | -0.05898509  | 0.252316515  | 0.311305025  | 0.807551893 | 0.07201966  | 0.006893779  |
| sp P55290 CAD13_HUMAN     | 1  | 40   | 76 | 33 | 0.333972 | 0.140759437  | -0.207260745 | -0.193212257 | -0.541232438 | -0.348020181 | 0.000938889 | 7.99E-14    | 1.51E-08     |
| sp P01009 A1AT_HUMAN      | 3  | 40   | 76 | 33 | -1.91531 | -1.925159911 | -1.359917513 | -0.009849232 | 0.555393166  | 0.565242397  | 0.999129358 | 0.153587816 | 0.085909041  |
| sp P13533 MYH6_HUMAN      | 15 | 40   | 76 | 33 | 0.112691 | -0.09842701  | 0.275217171  | -0.211117759 | 0.164831022  | 0.375948781  | 0.111642746 | 0.392842808 | 0.002787167  |
| sp Q9UJK2 MYH2_HUMAN      | 1  | 40   | 76 | 33 | 0.173455 | -0.025016859 | 0.138616476  | -0.198471738 | -0.034838403 | 0.163633335  | 0.164007068 | 0.961597347 | 0.337190016  |
| sp P04004 VTNC_HUMAN      | 12 | 40   | 76 | 33 | 0.21222  | 0.288935156  | 0.05230798   | 0.076715254  | -0.159911922 | -0.236627177 | 0.066549873 | 0.000437951 | 3.58E-09     |
| sp Q07654 TFF3_HUMAN      | 32 | 40   | 76 | 33 | -0.41037 | -0.215905465 | 0.115910997  | 0.194461453  | 0.526277915  | 0.331816461  | 0.310879888 | 0.003542831 | 0.053262113  |
| sp P02753 RET4_HUMAN      | 3  | 40   | 76 | 33 | 0.196101 | 0.143449374  | 0.094783459  | -0.052651599 | -0.101317514 | -0.048665915 | 0.482983321 | 0.15915836  | 0.578715936  |
| sp P69905 HBA_HUMAN       | 6  | 40   | 76 | 33 | -1.04551 | -0.791892941 | 0.079772118  | 0.253621312  | 1.125286372  | 0.871665059  | 0.439388525 | 3.75E-05    | 0.000354536  |
| sp P02790 HEMO_HUMAN      | 10 | 40   | 76 | 33 | 0.423362 | 0.385298989  | 0.085124151  | -0.038062587 | -0.338237426 | -0.300174839 | 0.684449438 | 2.29E-08    | 2.22E-08     |
| sp P13667 PDIA4_HUMAN     | 29 | 40   | 76 | 33 | -0.09626 | -0.024321028 | 0.40313688   | 0.071943903  | 0.499401812  | 0.427457909  | 0.576811532 | 1.32E-07    | 3.42E-07     |
| sp P02851 C4BPB_HUMAN     | 5  | 40   | 76 | 33 | 0.053194 | 0.156823727  | 0.170295658  | 0.103629974  | 0.117019004  | 0.013471931  | 0.104588563 | 0.136073962 | 0.966287641  |
| sp P04278 SHBG_HUMAN      | 23 | 40   | 76 | 33 | 0.101983 | 0.191028486  | 0.07847375   | 0.08904516   | -0.179830702 | -0.268875862 | 0.648594635 | 0.298674747 | 0.034670739  |
| sp Q01524 DEF6_HUMAN      | 13 | 12   | 20 | 9  | -0.06602 | 0.246062121  | 0.667489404  | 0.312085555  | 0.733512838  | 0.421427283  | 0.909945022 | 0.710405933 | 0.867441954  |
| sp P09871 C1S_HUMAN       | 4  | 40   | 76 | 33 | 0.241875 | 0.221825844  | 0.19190511   | -0.020049246 | -0.049969981 | -0.029920735 | 0.657011264 | 0.169509586 | 0.441355296  |
| sp P03951 FA1I_HUMAN      | 13 | 40   | 76 | 33 | 0.221177 | 0.192625627  | 0.01123571   | -0.02855118  | -0.209941097 | -0.181389917 | 0.693617638 | 5.16E-06    | 9.97E-06     |
| sp P17813 EGLN_HUMAN      | 1  | 40   | 76 | 33 | 0.214475 | 0.130168854  | -0.128369124 | -0.084036048 | -0.342844426 | -0.258537978 | 0.048102541 | 8.27E-13    | 5.77E-10     |
| sp Q13508 NAR3_HUMAN      | 3  | 40   | 76 | 33 | 0.132532 | 0.021468105  | -0.10286212  | -0.11106046  | -0.145394285 | -0.034330225 | 0.233063062 | 0.179517423 | 0.883456331  |
| sp A0A0C4DH38 HV551_HUMAN | 3  | 31   | 55 | 23 | -0.26932 | -0.261574446 | 0.203326677  | 0.007740612  | 0.472641735  | 0.464901123  | 0.997544543 | 0.003426684 | 0.001275641  |
| sp P02743 SAMP_HUMAN      | 5  | 40   | 76 | 33 | 0.188159 | 0.242545292  | 0.166038375  | 0.054386396  | -0.022120521 | -0.076506917 | 0.691742133 | 0.958665233 | 0.528096233  |
| sp P02776 PLF4_HUMAN      | 3  | 40   | 76 | 33 | -0.58204 | -0.096470592 | 0.10707919   | 0.485526628  | 0.571327954  | 0.085762674  | 0.002579096 | 0.003320988 | 0.840999745  |
| sp P01011 AACT_HUMAN      | 20 | 40   | 76 | 33 | 0.236646 | 0.280630269  | 0.506847078  | 0.043984658  | 0.270219125  | 0.262344559  | 0.736858828 | 0.000603493 | 0.001282076  |
| sp Q96KND CNDP1_HUMAN     | 19 | 40   | 76 | 33 | -0.22405 | 0.367072691  | -0.137794291 | 0.591119663  | 0.091252681  | -0.499866982 | 6.12E-11    | 0.621036187 | 1.45E-07     |
| sp P02741 CRP_HUMAN       | 2  | 40   | 76 | 33 | -1.59979 | -1.206699544 | -0.15644791  | 0.393053334  | 1.442150086  | 1.049054753  | 0.270229787 | 1.58E-05    | 0.000462012  |
| sp P12821 ACE_HUMAN       | 7  | 40   | 76 | 33 | 0.183914 | 0.084674064  | -0.042393981 | -0.099239882 | -0.226307927 | -0.127068045 | 0.176173141 | 0.002552868 | 0.083738505  |
| sp P19320 VCAM1_HUMAN     | 3  | 40   | 76 | 33 | -0.01759 | 0.043719901  | 0.388243903  | 0.061308299  | 0.405832301  | 0.344524003  | 0.623898377 | 3.11E-06    | 8.07E-06     |
| sp Q9UIQ6 LCAAP_HUMAN     | 2  | 30   | 56 | 24 | -0.10896 | 0.073283857  | 0.079709963  | 0.182247519  | 0.188667362  | 0.006426106  | 0.025795297 | 0.066672697 | 0.995908679  |
| sp Q6P179 ERAP2_HUMAN     | 2  | 40   | 76 | 33 | -0.09493 | 0.021851096  | -0.400336698 | 0.116776789  | 0.054588996  | -0.062187793 | 0.428427074 | 0.879104589 | 0.808486471  |
| sp P25311 ZAA2_HUMAN      | 3  | 40   | 76 | 33 | 0.343441 | 0.27863225   | 0.292038591  | -0.064080752 | -0.051402411 | 0.013406341  | 0.204325348 | 0.498697906 | 0.491164729  |
| sp P10909 CLUS_HUMAN      | 5  | 40   | 76 | 33 | 0.165864 | 0.196900202  | 0.155073487  | 0.031036237  | -0.010790478 | -0.041826715 | 0.455511158 | 0.936048703 | 0.28134249   |
| sp Q96IY4 CBP2_HUMAN      | 5  | 40   | 76 | 33 | 0.270286 | 0.121000721  | 0.165389505  | -0.058278214 | -0.104916463 | -0.046638216 | 0.104664623 | 0.007343349 | 0.277444623  |
| sp P02748 C9_HUMAN        | 6  | 40   | 76 | 33 | 0.10426  | 0.223412757  | 0.37799522   | 0.119524262  | 0.273734924  | 0.154582463  | 0.249140859 | 0.00765817  | 0.130054584  |
| sp P10912 GHR_HUMAN       | 6  | 40   | 76 | 33 | 0.107297 | 0.138367675  | -0.229596634 | 0.03107107   | -0.33689324  | -0.367964309 | 0.895504057 | 0.00260525  | 5.57E-07     |
| sp P02788 TRF1_HUMAN      | 1  | 40   | 76 | 33 | -0.30832 | -0.091070038 | 0.2328419    | 0.217250021  | 0.51460245   | 0.324354228  | 0.138094319 | 0.000335126 | 0.022300813  |
| sp Q01518 CAP1_HUMAN      | 19 | 40   | 76 | 33 | -0.13564 | -0.21508362  | 0.212788239  | -0.079439276 | 0.348432583  | 0.427871858  | 0.485932334 | 0.119981886 | 0.018464195  |
| sp P17936 BP3_HUMAN       | 2  | 40   | 76 | 33 | 0.141168 | 0.22785605   | -0.23011564  | 0.086617658  | -0.371283587 | -0.457901245 | 0.258451498 | 2.83E-07    | 3.01E-12     |
| sp P60709 ACTB_HUMAN      | 2  | 40   | 76 | 33 | 0.237027 | 0.039583762  | 0.33646864   | -0.197442777 | 0.099622102  | 0.297063876  | 0.107104581 | 0.670294183 | 0.012906373  |
| sp P02452 CO1A1_HUMAN     | 12 | 40   | 76 | 33 | 0.058498 | 0.071492318  | 0.513427475  | 0.012994686  | 0.454929843  | 0.441935157  | 0.983715655 | 4.45E-06    | 4.96E-07     |
| sp P55103 INHBC_HUMAN     | 59 | 40   | 76 | 33 | 0.011943 | 0.06850657   | 0.21263051   | 0.056563678  | 0.200687617  | 0.14412394   | 0.444630234 | 0.001308926 | 0.011671729  |
| sp Q8N149 LIRA2_HUMAN     | 18 | 40   | 76 | 33 | -0.15294 | -0.005983735 | 0.132762011  | 0.146959934  | 0.285705086  | 0.138745746  | 0.058495665 | 0.491146608 | 0.001946608  |
| sp P06049 SNX3_HUMAN      | 1  | 40   | 76 | 33 | 0.168679 | 0.158764672  | 0.444420389  | -0.009914419 | 0.275741298  | 0.285655717  | 0.995160238 | 0.080323216 | 0.032952724  |
| sp Q6EMK4 VASN_HUMAN      | 6  | 40   | 76 | 33 | 0.201135 | 0.17227202   | 0.262538896  | -0.028863394 | 0.061403483  | 0.090266876  | 0.549938617 | 0.158356952 | 0.077352571  |
| sp P08185 CBG_HUMAN       | 1  | 40   | 76 | 33 | 0.268934 | 0.35380291   | 0.155172744  | 0.084869127  | -0.217361039 | -0.302230166 | 0.28258922  | 0.004167405 | 3.30E-06     |
| sp P04180 LCAT_HUMAN      | 9  | 40   | 76 | 33 | 0.297369 | 0.187365324  | 0.132396678  | -0.110003311 | -0.164971958 | -0.054968647 | 0.00485323  | 0.000317361 | 0.295867272  |
| sp P05019 IGF1_HUMAN      | 3  | 40   | 76 | 33 | 0.019512 | 0.18531131   | 0.224413234  | 0.165798946  | -0.240943598 | -0.406742544 | 0.050695889 | 0.013729169 | 6.86E-07     |
| sp P20930 FILA_HUMAN      | 2  | 40   | 76 | 33 | -0.27641 | -0.441185323 | -0.36445302  | -0.164773203 | -0.088038181 | 0.076735022  | 0.488588649 | 0.867669453 | 0.871737445  |
| sp Q8N6C8 LIRA3_HUMAN     | 2  | 40   | 76 | 33 | 0.15619  | -0.156127833 | -0.574352068 | -0.312317567 | -0.730541802 | -0.418224035 | 0.352749162 | 0.021870188 | 0.195805565  |
| sp Q10473 GDF8_HUMAN      | 1  | 40   | 76 | 33 | 0.237663 | 0.061276731  | -0.339960324 | -0.176386175 | -0.577623229 | -0.041237054 | 0.034686273 | 6.40E-10    | 9.89E-07     |
| sp Q14960 LECT2_HUMAN     | 1  | 40   | 76 | 33 | -0.06441 | -0.048166637 | 0.059175919  | 0.109229584  | 0.005237029  | -0.103992555 | 0.311851408 | 0.998130602 | 0.394708186  |
| sp P55854 SUMO3_HUMAN     | 2  | 40   | 76 | 33 | -0.28427 | -0.249271797 | 0.261246645  | 0.035002597  | 0.545521039  | 0.105158442  | 0.947932039 | 0.000259733 | 0.00018735   |
| sp P02160 CAP7_HUMAN      | 18 | 36   | 70 | 30 | -0.57776 | -0.447710242 | 0.019108455  | 0.130054229  | 0.596872927  | 0.466818697  | 0.609082819 | 0.001203984 | 0.00473791   |
| sp P07503 LIR5_HUMAN      | 11 | 40   | 76 | 33 | 0.360687 | 0.391278458  | 0.306958696  | 0.030591692  | -0.053728071 | -0.084319763 | 0.759711187 | 0.588236778 | 0.164661596  |
| sp P02042 HBD_HUMAN       | 11 | 40   | 76 | 33 | -1.30185 | -1.121303744 | -0.074072849 | 0.180545029  | 1.22775924   | 1.047230895  | 0.734887952 | 0.002014746 | 0.002626089  |
| sp P00746 CFAD_HUMAN      | 4  | 40   | 76 | 33 | 0.818716 | 0.803912318  | 0.905619649  | -0.014803848 | 0.086903482  | 0.10170733   | 0.924500988 | 0.160050256 | 0.0442830876 |
| sp P00738 HPT_HUMAN       | 4  | 40   | 76 | 33 | -1.2273  | -0.770042817 | -0.442344916 | 0.457259866  | 0.784957767  | 0.327697902  | 0.173159945 | 0.030315194 | 0.049816211  |
| sp P07360 C08G_HUMAN      | 3  | 40   | 76 | 33 | 0.216168 | 0.196732118  | 0.130749923  | -0.019435722 | -0.085417917 | -0.065982195 | 0.775132099 | 0.037289824 | 0.080694446  |
| sp P07225 PRO5_HUMAN      | 2  | 40   | 76 | 33 | 0.11409  | 0.181690018  | 0.163605324  | 0.067600115  | 0.049515421  | -0.018084695 | 0.114147387 | 0.442689347 | 0.869949445  |
| sp P02675 FIBB_HUMAN      | 4  | 40   | 76 | 33 | 0.025417 | 0.158020323  | 0.308707445  | 0.132603476  | 0.283290598  | 0.150687122  | 0.130608293 | 0.002129923 | 0.010106426  |
| sp P04003 CABPA_HUMAN     | 3  | 40   | 76 | 33 | 0.633682 | 0.757206224  | 0.757715697  | 0.123523792  | 0.124033265  | 0.000509473  | 0.056196178 | 0.132578508 | 0.999955686  |
| sp Q00533 NCHL1_HUMAN     | 1  | 40   | 76 | 33 | 0.268685 | 0.17453486   | -0.019263519 | -0.094150124 | -0.287948503 | -0.19379838  | 0.129122816 | 6.07E-06    | 0.000722078  |
| sp Q92954 PRG4_HUMAN      | 3  | 40</ |    |    |          |              |              |              |              |              |             |             |              |



|                       |     |    |    |    |          |              |              |              |              |              |             |             |             |
|-----------------------|-----|----|----|----|----------|--------------|--------------|--------------|--------------|--------------|-------------|-------------|-------------|
| sp P10451 OSTP_HUMAN  | 1   | 40 | 76 | 33 | -0.46963 | -0.42325956  | 0.212183335  | 0.046374177  | 0.681817072  | 0.635442895  | 0.927180052 | 3.69E-05    | 1.39E-05    |
| sp P13671 COG_HUMAN   | 1   | 40 | 76 | 33 | 0.268222 | 0.292828394  | 0.19280361   | 0.024606565  | -0.075419468 | -0.100026033 | 0.696417936 | 0.100461276 | 0.006704118 |
| sp P007363 CIR_HUMAN  | 7   | 40 | 76 | 33 | 0.263002 | 0.278652434  | 0.206691652  | 0.015650655  | -0.056310127 | -0.071960782 | 0.776726081 | 0.01691565  | 0.011272609 |
| sp P08493 MGFP_HUMAN  | 6   | 40 | 76 | 33 | -0.09021 | -0.133145379 | 0.30744763   | -0.042930582 | 0.397662427  | 0.440593009  | 0.799246921 | 7.14E-06    | 2.24E-08    |
| sp P05164 PERM_HUMAN  | 4   | 40 | 76 | 33 | -0.02845 | -0.16398756  | 0.755639835  | 0.192440151  | 0.784092425  | 0.591652274  | 0.187003681 | 5.57E-08    | 3.57E-06    |
| sp P21333 FLNA_HUMAN  | 6   | 40 | 76 | 33 | 0.147181 | 0.423527811  | 0.675556589  | 0.276347163  | 0.52837594   | 0.252028777  | 0.088828977 | 0.002744037 | 0.168677358 |
| sp P13796 PLSL_HUMAN  | 4   | 40 | 76 | 33 | -0.01179 | 0.127697593  | 0.329261749  | 0.139487722  | 0.341051878  | 0.201564155  | 0.051847071 | 1.27E-05    | 0.004990522 |
| sp Q9H262 SLK_HUMAN   | 5   | 4  | 7  | 3  | 0.098117 | 0.24747819   | -0.114534379 | 0.149361201  | -0.212651368 | -0.362012569 | 0.818073492 | 0.761660575 | 0.402947891 |
| sp P04275 VWF_HUMAN   | 4   | 40 | 76 | 33 | -0.07417 | 0.040139918  | 0.739250711  | 0.114305854  | 0.813416647  | 0.699110793  | 0.476963058 | 4.98E-10    | 1.50E-09    |
| sp P43251 BDT_HUMAN   | 1   | 40 | 76 | 33 | 0.373401 | 0.23459162   | -0.028390258 | -0.13880981  | -0.401791688 | -0.262981878 | 0.000882448 | 4.55E-14    | 2.49E-09    |
| sp P02679 FIBG_HUMAN  | 1   | 40 | 76 | 33 | 0.036672 | 0.18714675   | 0.348800995  | 0.150475116  | 0.312129361  | 0.161654245  | 0.114617239 | 0.002074144 | 0.114373757 |
| sp P02786 TFR1_HUMAN  | 85  | 40 | 76 | 33 | 0.219743 | -0.047019844 | -0.065312901 | -0.056763267 | -0.285056324 | -0.018293057 | 0.055946135 | 0.101707369 | 0.888362771 |
| sp P26038 MOES_HUMAN  | 3   | 40 | 76 | 33 | 0.096381 | 0.078402148  | 0.292072805  | -0.017979244 | 0.195691413  | 0.213670657  | 0.961594421 | 0.045034603 | 0.009739573 |
| sp P25786 PSA1_HUMAN  | 6   | 40 | 76 | 33 | -0.2358  | -0.035786028 | 0.594118143  | 0.200014532  | 0.829918702  | 0.629904171  | 0.207745064 | 8.53E-08    | 4.35E-06    |
| sp Q98Y99 CDHR2_HUMAN | 2   | 40 | 76 | 33 | -0.81147 | -0.475053696 | 0.603392965  | 0.336420213  | 1.414866874  | 1.078446661  | 0.068436003 | 3.04E-12    | 1.15E-09    |
| sp Q95810 CAV2_HUMAN  | 1   | 40 | 76 | 33 | -0.19948 | -0.345327676 | -0.086786429 | -0.145850259 | 0.112690988  | 0.258541247  | 0.675789397 | 0.850600235 | 0.341864424 |
| sp P02750 A2GL_HUMAN  | 2   | 40 | 76 | 33 | -0.32463 | -0.077311582 | 0.427606841  | 0.247318626  | 0.752237048  | 0.504918423  | 0.165443353 | 2.61E-05    | 0.001847175 |
| sp P08118 MSMB_HUMAN  | 2   | 40 | 76 | 33 | -0.011   | -0.118385122 | 0.069863078  | -0.107385252 | 0.080962949  | 0.188348201  | 0.284999754 | 0.800780051 | 0.03619074  |
| sp P30101 PDI3A_HUMAN | 2   | 40 | 76 | 33 | 0.084196 | 0.127754601  | 0.215325621  | 0.043558663  | 0.131039682  | 0.08748102   | 0.801051578 | 0.254425101 | 0.457917963 |
| sp Q06033 ITH3_HUMAN  | 18  | 40 | 76 | 33 | 0.042838 | 0.110584099  | 0.4211313948 | 0.067751879  | 0.378476418  | 0.310724539  | 0.631664305 | 0.000113667 | 0.000379249 |
| sp P46531 NOTC1_HUMAN | 364 | 40 | 76 | 33 | 0.196245 | 0.202482781  | 0.093114619  | 0.006237937  | -0.103130225 | -0.109368162 | 0.978193002 | 0.018493055 | 0.003626956 |
| sp P07358 CO8B_HUMAN  | 2   | 40 | 76 | 33 | 0.614161 | 0.590249516  | 0.528524949  | -0.023911672 | -0.085636239 | -0.061724567 | 0.72154008  | 0.0595803   | 0.152837286 |
| sp P07359 GP1BA_HUMAN | 4   | 40 | 76 | 33 | 0.16117  | 0.105910799  | 0.128622191  | -0.055259357 | -0.032547965 | 0.022711392  | 0.452727194 | 0.826205294 | 0.888362771 |
| sp Q9UNW1 MINP1_HUMAN | 1   | 40 | 76 | 33 | 0.086723 | 0.136121968  | 0.082891529  | 0.049399103  | -0.003831337 | -0.053230439 | 0.231418684 | 0.993850036 | 0.225021468 |
| sp P02745 C1QA_HUMAN  | 12  | 40 | 76 | 33 | 0.154021 | 0.295186171  | 0.167036695  | 0.14116556   | 0.013016085  | -0.128149476 | 0.162742700 | 0.989203379 | 0.267011398 |
| sp Q00187 MA5P2_HUMAN | 7   | 40 | 76 | 33 | 0.271055 | 0.384985026  | 0.387277349  | 0.113929943  | 0.116222266  | 0.002292324  | 0.032290116 | 0.083007146 | 0.99873613  |
| sp Q86V87 C163A_HUMAN | 2   | 40 | 76 | 33 | -0.1016  | 0.041289818  | 0.315158087  | 0.142894041  | 0.416762039  | 0.273868268  | 0.151870562 | 3.70E-05    | 0.002904192 |
| sp Q9UBV2 SE1L1_HUMAN | 4   | 4  | 6  | 3  | 0.10389  | -0.002173201 | 1.141139113  | -0.106602726 | 1.037249588  | 1.143312314  | 0.979379051 | 0.28664279  | 0.184709389 |
| sp Q03591 FHR1_HUMAN  | 1   | 40 | 76 | 33 | 0.108033 | 0.141331317  | 0.107886347  | 0.03329873   | -0.00014624  | -0.03344497  | 0.353197122 | 0.995895996 | 0.397352729 |
| sp Q9UN70 PCDCK_HUMAN | 7   | 40 | 76 | 33 | 0.00834  | 0.033538145  | 0.098508344  | 0.025197975  | 0.090168174  | 0.064970199  | 0.83180425  | 0.201328195 | 0.344762164 |
| sp Q6XU71 PKDC2_HUMAN | 26  | 40 | 76 | 33 | 0.145115 | 0.086980075  | 0.177022739  | -0.058135274 | 0.031907423  | 0.090042664  | 0.211743178 | 0.72118351  | 0.0401906   |
| sp P11226 MB12_HUMAN  | 4   | 40 | 76 | 33 | -0.06025 | -0.165551903 | -0.03387612  | -0.105304554 | 0.026371229  | 0.131675303  | 0.746356527 | 0.987383117 | 0.66955235  |
| sp P04196 HRG_HUMAN   | 3   | 40 | 76 | 33 | 0.235597 | 0.211578539  | -0.068086744 | -0.024018191 | -0.303683473 | -0.279665282 | 0.89774752  | 2.20E-05    | 1.02E-05    |
| sp Q6UW88 E3T3_HUMAN  | 21  | 33 | 62 | 27 | 0.024089 | -0.065266881 | -0.196851971 | -0.089356917 | -0.220941167 | -0.13158509  | 0.326999305 | 0.0108173   | 0.123394775 |
| sp Q8TDL5 BP1B1_HUMAN | 1   | 36 | 69 | 30 | -0.09242 | 0.015488018  | 0.318556108  | 0.1079037    | 0.41097179   | 0.30360809   | 0.403625948 | 0.000223697 | 0.002511844 |
| sp P04070 PRO_C_HUMAN | 1   | 40 | 76 | 33 | 0.197748 | 0.158685115  | -0.008921721 | -0.039062865 | -0.206669701 | -0.167606836 | 0.455331242 | 1.42E-06    | 1.05E-05    |
| sp P07711 CATL1_HUMAN | 7   | 40 | 76 | 33 | 0.019604 | 0.067083537  | 0.182751159  | 0.047479851  | 0.163147473  | 0.115667621  | 0.490135204 | 0.0039612   | 0.021760839 |
| sp P61626 LYSC_HUMAN  | 6   | 40 | 76 | 33 | -0.0277  | 0.160130659  | 0.29527066   | 0.187826766  | 0.322966767  | 0.135140001  | 0.009064506 | 0.000100498 | 0.117127382 |
| sp P08571 CD14_HUMAN  | 1   | 40 | 76 | 33 | 0.057528 | 0.091927644  | 0.221708771  | 0.034399561  | 0.164180688  | 0.129781127  | 0.752021968 | 0.013604476 | 0.031866415 |
| sp Q71U36 TBA1A_HUMAN | 1   | 40 | 76 | 33 | -0.33333 | -0.10018792  | 0.185740916  | 0.233140071  | 0.1519069548 | 0.285928837  | 0.158319043 | 0.002372396 | 0.088962793 |
| sp P54289 CA2D1_HUMAN | 13  | 40 | 76 | 33 | 0.293177 | 0.101622661  | 0.343494878  | -0.19155469  | -0.63667223  | -0.445117539 | 0.00711622  | 1.10E-13    | 1.37E-09    |
| sp P01024 CO3_HUMAN   | 9   | 40 | 76 | 33 | 0.43664  | 0.381683772  | 0.46079642   | -0.054956372 | 0.024156276  | 0.079112648  | 0.353820881 | 0.869502842 | 0.153526056 |
| sp P02747 C1QC_HUMAN  | 9   | 40 | 76 | 33 | -0.04302 | 0.130909731  | -0.039021824 | 0.173926879  | 0.003995324  | -0.169931555 | 0.089472039 | 0.999098964 | 0.131194997 |
| sp P02749 APOH_HUMAN  | 1   | 40 | 76 | 33 | 0.164332 | 0.123430789  | 0.130778943  | -0.040900738 | -0.033552584 | 0.007348154  | 0.645293064 | 0.815538845 | 0.987607159 |
| sp P01034 CYTC_HUMAN  | 29  | 40 | 76 | 33 | 0.017167 | 0.030203224  | 0.421950703  | 0.013035913  | 0.404783392  | 0.391747479  | 0.974370637 | 3.12E-07    | 2.56E-08    |
| sp P21589 SNTD_HUMAN  | 1   | 40 | 76 | 33 | -0.23397 | -0.060258289 | 0.001660226  | 0.173715419  | 0.235639394  | 0.061918515  | 0.083637385 | 0.043708342 | 0.753273455 |
| sp P16109 LYAM3_HUMAN | 3   | 40 | 76 | 33 | -0.13254 | 0.007615598  | 0.236750321  | 0.1401512    | 0.369287434  | 0.229134724  | 0.044631589 | 1.33E-06    | 0.000882525 |
| sp P81605 DCD_HUMAN   | 1   | 40 | 76 | 33 | -0.3149  | -0.205176813 | 0.045615448  | 0.109723568  | 0.360515829  | 0.250792261  | 0.667177367 | 0.053082296 | 0.16063907  |
| sp Q96FE7 P3IP1_HUMAN | 1   | 40 | 76 | 33 | -0.2316  | -0.223841487 | 0.121530272  | 0.007759444  | 0.353131203  | 0.345371759  | 0.995287976 | 0.000495074 | 0.000495074 |
| sp P17301 ITA2_HUMAN  | 5   | 40 | 76 | 33 | 0.042222 | 0.005627789  | -0.056083548 | -0.036594206 | -0.098305542 | -0.061711337 | 0.682152165 | 0.15337395  | 0.387005437 |
| sp P27487 DPP4_HUMAN  | 1   | 40 | 76 | 33 | 0.180163 | 0.07497484   | -0.148465078 | -0.105188053 | -0.328627971 | -0.223439918 | 0.088026108 | 4.54E-07    | 0.000119937 |
| sp Q12884 SEPR_HUMAN  | 11  | 40 | 76 | 33 | 0.141339 | 0.020234233  | -0.102345695 | -0.121105142 | -0.2436807   | -0.122579928 | 0.297594955 | 0.03639829  | 0.335681641 |
| sp Q9UHG3 PCYOX_HUMAN | 1   | 40 | 76 | 33 | 0.102564 | 0.034863907  | 0.067183132  | -0.067699989 | -0.035380765 | 0.032319224  | 0.489598964 | 0.87351368  | 0.866058585 |
| sp P22891 PROZ_HUMAN  | 1   | 40 | 76 | 33 | 0.331102 | 0.264003263  | 0.02611638   | -0.067098424 | -0.304985308 | -0.237886884 | 0.554272539 | 0.000403518 | 0.002139633 |
| sp P23381 SYWC_HUMAN  | 10  | 40 | 76 | 33 | -0.22304 | 0.085538542  | 0.32735786   | 0.308581532  | 0.550401151  | 0.241819318  | 0.000515219 | 1.89E-07    | 0.014742429 |
| sp Q92484 ASM3A_HUMAN | 3   | 40 | 76 | 33 | 0.127148 | 0.100277248  | 0.055475213  | -0.026870298 | -0.071672333 | -0.044802034 | 0.943764735 | 0.753188324 | 0.868363641 |
| sp P24593 BP5_HUMAN   | 6   | 40 | 76 | 33 | 0.138379 | 0.124468836  | -0.026795904 | -0.013909876 | -0.165174616 | -0.15126474  | 0.936955962 | 0.002656408 | 0.00175853  |
| sp P22692 BP4_HUMAN   | 1   | 40 | 76 | 33 | -0.00633 | 0.0247718    | 0.32296957   | 0.031097955  | 0.329295725  | 0.29819777   | 0.875726307 | 8.53E-05    | 5.87E-05    |
| sp P08833 BP1_HUMAN   | 7   | 40 | 76 | 33 | -0.34916 | -0.264298895 | -0.1244171   | 0.084863499  | 0.224745274  | 0.139881775  | 0.800221624 | 0.343403008 | 0.58866805  |
| sp Q00462 MANBA_HUMAN | 5   | 40 | 76 | 33 | 0.114045 | 0.025732824  | 0.017346314  | -0.041791301 | -0.096698811 | -0.05490751  | 0.511299116 | 0.36313032  | 0.0313032   |
| sp P49747 COMP_HUMAN  | 1   | 40 | 76 | 33 | 0.281967 | 0.17946943   | -0.001261265 | -0.102497161 | -0.283227856 | -0.180730695 | 0.24655800  | 0.000930866 | 0.023953692 |
| sp P05452 TETH_HUMAN  | 34  | 40 | 76 | 33 | 0.262959 | 0.167538308  | -0.200176567 | -0.09542001  | -0.463135186 | -0.367714876 | 0.038308186 | 3.81E-14    | 4.67E-14    |
| sp Q9BQ66 KR412_HUMAN | 2   | 4  | 7  | 3  | -0.03261 | 0.424495419  | 0.203638452  | 0.457103314  | -0.271030556 | -0.72813387  | 0.807766606 | 0.94959205  | 0.645717021 |
| sp Q16627 CCL14_HUMAN | 55  | 40 | 76 | 33 | -0.07359 | 0.042166955  | -0.233119044 | 0.115759137  | 0.306711226  | 0.190952089  | 0.133006629 | 0.000109732 | 0.000197976 |
| sp Q8NB97 PCS9_HUMAN  | 1   | 40 | 76 | 33 | 0.025581 | 0.071592863  | 0.159083844  | 0.046011622  | 0.133502603  | 0.087490981  | 0.67085342  | 0.102933569 | 0.248439    |
| sp P28799 GRN_HUMAN   | 47  | 40 | 76 | 33 | 0.081921 | 0.142670847  | 0.246905849  |              |              |              |             |             |             |

|                        |     |    |    |    |            |               |              |              |              |              |             |             |             |
|------------------------|-----|----|----|----|------------|---------------|--------------|--------------|--------------|--------------|-------------|-------------|-------------|
| sp P24387 CRHBP_HUMAN  | 29  | 40 | 76 | 33 | 0.058584   | 0.045870225   | 0.180745087  | -0.012713623 | 0.122161239  | 0.134874862  | 0.941443412 | 0.024695644 | 0.003580685 |
| sp O43278 SPIT1_HUMAN  | 12  | 40 | 76 | 33 | -0.10861   | -0.040181795  | 0.026777395  | 0.068429615  | 0.537388805  | 0.468959191  | 0.552807327 | 8.0E-10     | 1.41E-09    |
| sp P07033 GDN_HUMAN    | 2   | 40 | 76 | 33 | -0.39523   | -0.093272093  | 0.146135517  | 0.301961559  | 0.501369169  | 0.19940761   | 0.00774394  | 0.000136801 | 0.146983056 |
| sp Q9NY15 STAB1_HUMAN  | 35  | 40 | 76 | 33 | 0.241415   | 0.213948281   | 0.1580146    | -0.027466267 | -0.083399947 | -0.05933368  | 0.579960688 | 0.034537353 | 0.141639431 |
| sp Q14118 DAG1_HUMAN   | 29  | 40 | 76 | 33 | 0.052365   | 0.016311737   | 0.367380646  | -0.036052869 | 0.315016039  | 0.351068909  | 0.822055541 | 8.10E-05    | 6.39E-07    |
| sp Q9UBQ7 GRHPR_HUMAN  | 11  | 40 | 76 | 33 | -0.15371   | -0.099147765  | 0.180291889  | 0.054566785  | 0.334006439  | 0.279439654  | 0.824888114 | 0.008663327 | 0.014257821 |
| sp G6UX88 PI16_HUMAN   | 621 | 40 | 76 | 33 | 0.854951   | 0.773050443   | 0.493662266  | -0.081900532 | -0.36128871  | -0.279388178 | 0.570420983 | 0.000858229 | 0.004268681 |
| sp Q9UNN8 EPCR_HUMAN   | 31  | 40 | 76 | 33 | 0.107174   | 0.083888722   | 0.079238061  | -0.023287237 | -0.027936396 | -0.004649159 | 0.869506044 | 0.870359119 | 0.995111653 |
| sp P20933 ASPG_HUMAN   | 133 | 40 | 76 | 33 | 0.053938   | -0.027349533  | 0.0266917    | -0.081287418 | -0.027246186 | 0.054041233  | 0.348720015 | 0.928000931 | 0.662589563 |
| sp Q96CX2 KCD12_HUMAN  | 97  | 40 | 76 | 33 | 0.092534   | 0.014977797   | 0.027606074  | -0.07755824  | -0.064927547 | 0.012628277  | 0.141388245 | 0.384443201 | 0.954598041 |
| sp P12259 FA5_HUMAN    | 126 | 40 | 76 | 33 | 0.135399   | 0.200156794   | 0.25871773   | 0.064758095  | 0.123319031  | 0.058560935  | 0.181844669 | 0.015614506 | 0.292300457 |
| sp P25789 PSA4_HUMAN   | 140 | 40 | 76 | 33 | -0.35443   | -0.162137042  | 0.343397042  | 0.192288765  | 0.697822849  | 0.505534084  | 0.149765672 | 2.43E-07    | 2.51E-05    |
| sp P13727 PRG2_HUMAN   | 47  | 40 | 76 | 33 | 0.056493   | 0.015470379   | 0.119503124  | -0.041022863 | 0.063009881  | 0.104032744  | 0.804074712 | 0.701561991 | 0.295738334 |
| sp Q76X48 ATS13_HUMAN  | 699 | 40 | 76 | 33 | 0.201634   | 0.204882409   | -0.115553754 | 0.003248829  | -0.317187334 | -0.320436163 | 0.996812752 | 1.90E-08    | 2.17E-10    |
| sp Q9Y5Y7 LYVE1_HUMAN  | 263 | 40 | 76 | 33 | 0.051896   | 0.104096326   | 0.142162671  | 0.052200632  | 0.090266978  | 0.038066345  | 0.710087573 | 0.494770633 | 0.852070419 |
| sp P10586 PTPRF_HUMAN  | 538 | 40 | 76 | 33 | 0.060004   | 0.131567008   | 0.263114763  | 0.071562788  | 0.203110544  | 0.131547755  | 0.257680711 | 0.000812075 | 0.01986941  |
| sp P14151 LYAM1_HUMAN  | 6   | 40 | 76 | 33 | 0.054749   | 0.164041472   | -0.206571303 | 0.10929236   | -0.261320416 | -0.370612775 | 0.120399002 | 0.000374831 | 1.01E-08    |
| sp Q02985 FHR3_HUMAN   | 32  | 40 | 76 | 33 | -0.01389   | -0.07095263   | -0.055990104 | -0.057065936 | -0.04170341  | 0.015362526  | 0.346654362 | 0.674923209 | 0.934143609 |
| sp P30043 BLVRB_HUMAN  | 44  | 40 | 76 | 33 | -0.36905   | -0.084450829  | 0.167175277  | 0.284596505  | 0.53622261   | 0.251626106  | 0.013913481 | 4.90E-05    | 0.051160093 |
| sp P23468 PTPRD_HUMAN  | 8   | 40 | 76 | 33 | 0.100514   | 0.091979236   | -0.000133862 | -0.008534674 | -0.100647772 | -0.092113098 | 0.959993357 | 0.023078616 | 0.018182086 |
| sp P98160 PGBM_HUMAN   | 6   | 40 | 76 | 33 | 0.388557   | 0.339729505   | 0.379861454  | -0.048827714 | -0.008695765 | 0.040131949  | 0.376389245 | 0.978629845 | 0.55879314  |
| sp P55266 LAMB2_HUMAN  | 335 | 40 | 76 | 33 | -0.121033  | 0.110980082   | 0.222593517  | -0.010052444 | 0.101560991  | 0.111613436  | 0.954117222 | 0.040732692 | 0.007915108 |
| sp P68871 HBB_HUMAN    | 149 | 40 | 76 | 33 | -1.49187   | -1.130994485  | 0.027617905  | 0.36087498   | 1.42425156   | 1.06337658   | 0.26948772  | 2.98E-06    | 9.08E-05    |
| sp Q9UHD8 SEPT9_HUMAN  | 453 | 4  | 7  | 3  | 0.245954   | 0.078410929   | -0.09573579  | -0.167543178 | -0.341689897 | -0.174146719 | 0.151087637 | 0.185933983 | 0.551440516 |
| sp P09493 TPM1_HUMAN   | 264 | 40 | 76 | 33 | 0.046251   | -0.31804714   | -0.38103931  | -0.364291873 | -0.014447229 | 0.349844645  | 0.022942024 | 0.995748836 | 0.046041229 |
| sp Q60U4 DMKN_HUMAN    | 207 | 40 | 76 | 33 | -0.2014    | -0.329819302  | -0.012565616 | -0.128422205 | 0.18883148   | 0.317253866  | 0.203158777 | 0.094539585 | 0.000330609 |
| sp P08670 VIME_HUMAN   | 273 | 40 | 76 | 33 | -1.00632   | -0.799528945  | 0.067507213  | 0.206794096  | 0.944815828  | 0.738021732  | 0.202748064 | 3.36E-09    | 1.60E-07    |
| sp P00915 CAH1_HUMAN   | 913 | 40 | 76 | 33 | -0.25181   | 0.072081735   | 0.051532431  | 0.32388705   | 0.603337745  | 0.279450695  | 0.008394358 | 2.01E-05    | 0.041795473 |
| sp P27169 POM1_HUMAN   | 15  | 40 | 76 | 33 | 0.40943    | 0.213537105   | 0.3858614977 | -0.195893176 | -0.350815304 | -0.154922128 | 0.009087904 | 5.01E-05    | 0.01774696  |
| sp P68366 TBA4A_HUMAN  | 41  | 40 | 76 | 33 | -0.32623   | -0.067447938  | 0.048296921  | 0.258781264  | 0.374526123  | 0.115744859  | 0.063548424 | 0.019533334 | 0.60919296  |
| sp Q07960 RHG01_HUMAN  | 3   | 40 | 76 | 33 | -0.11493   | -0.046918472  | 0.143329737  | 0.068009613  | 0.258257823  | 0.19024821   | 0.666381884 | 0.020339564 | 0.065749362 |
| sp Q86UX2 ITH5_HUMAN   | 2   | 40 | 76 | 33 | 0.003459   | -0.07717917   | -0.03079829  | -0.080637921 | -0.034257041 | 0.04638088   | 0.077394316 | 0.721673527 | 0.468907669 |
| sp Q8NHM4 TRY6_HUMAN   | 3   | 40 | 76 | 33 | 0.120517   | -0.005474735  | -0.128784244 | -0.125995148 | -0.249301057 | -0.123309509 | 0.00046668  | 6.91E-09    | 0.001472358 |
| sp O75636 FCN3_HUMAN   | 435 | 40 | 76 | 33 | 0.067236   | 0.193359997   | 0.031358961  | 0.126124308  | -0.035876729 | -0.162001037 | 0.10424066  | 0.878888259 | 0.039069121 |
| sp P07602 SAP_HUMAN    | 2   | 40 | 76 | 33 | -0.21912   | -0.116828449  | 0.41299935   | 0.002293754  | 0.632121553  | 0.529827799  | 0.345121921 | 1.03E-10    | 8.31E-10    |
| sp P14314 GLUL2B_HUMAN | 2   | 40 | 76 | 33 | -0.1373    | -0.13471165   | 0.313552341  | 0.020586103  | 0.450850094  | 0.448263991  | 0.998845056 | 2.08E-09    | 2.87E-11    |
| sp P22105 TENX_HUMAN   | 9   | 40 | 76 | 33 | 0.362      | 0.289604448   | 0.051228037  | -0.07239508  | -0.310771491 | -0.238376411 | 0.1885986   | 1.23E-08    | 7.38E-07    |
| sp P37840 SYUA_HUMAN   | 15  | 40 | 76 | 33 | -0.07674   | -0.19611775   | 0.203360604  | -0.119382182 | 0.280096172  | 0.399478354  | 0.385016716 | 0.029305124 | 0.000167878 |
| sp Q86UX7 URP2_HUMAN   | 2   | 40 | 76 | 33 | 0.035739   | -0.165911529  | -0.015045061 | -0.201650346 | -0.050783878 | 0.150866468  | 0.38486826  | 0.958684137 | 0.623960547 |
| sp P63098 CANB1_HUMAN  | 3   | 36 | 70 | 30 | 0.027884   | 0.14056918    | 0.440087701  | 0.112685129  | 0.41299365   | 0.300308521  | 0.382422795 | 0.000266906 | 0.003254415 |
| sp Q14766 ITBP1_HUMAN  | 1   | 40 | 76 | 33 | -0.32866   | -0.0011282572 | 0.238439923  | 0.327345745  | 0.56710424   | 0.239668494  | 0.001257862 | 2.17E-06    | 0.038800996 |
| sp P49908 SEPP1_HUMAN  | 2   | 40 | 76 | 33 | 0.234509   | 0.211184037   | 0.052968656  | -0.023325353 | -0.231912534 | -0.208587181 | 0.82113298  | 6.21E-06    | 4.52E-06    |
| sp P20742 PZP_HUMAN    | 5   | 40 | 76 | 33 | -0.04039   | 0.148065212   | -0.175624183 | 0.18845853   | -0.135230865 | -0.323689935 | 0.559874709 | 0.813107424 | 0.22581933  |
| sp Q9NPY3 C1QR1_HUMAN  | 3   | 40 | 76 | 33 | 0.067231   | 3.95E-05      | 0.17631598   | -0.067191735 | 0.10908472   | 0.176276455  | 0.61539516  | 8.15E-04    | 0.057238114 |
| sp P12955 PEPP_HUMAN   | 1   | 40 | 76 | 33 | 0.289395   | 0.221733471   | 0.062976468  | -0.067661746 | -0.226418749 | -0.158757003 | 0.090455598 | 4.82E-08    | 2.20E-05    |
| sp Q02487 DSC2_HUMAN   | 24  | 40 | 76 | 33 | 0.048635   | 0.024423056   | 0.390832463  | -0.024212095 | 0.342197312  | 0.366409407  | 0.929205475 | 9.71E-05    | 2.19E-06    |
| sp Q07075 AMPE_HUMAN   | 3   | 40 | 76 | 33 | 0.175578   | 0.26325343    | -0.014735199 | 0.087675652  | -0.190312977 | -0.277988269 | 0.037154444 | 4.38E-05    | 3.21E-11    |
| sp P05556 ITB1_HUMAN   | 6   | 40 | 76 | 33 | 0.230416   | 0.199440531   | 0.102158433  | -0.030975875 | -0.128257973 | -0.097282098 | 0.58657406  | 0.001521189 | 0.00809051  |
| sp P08709 FA7_HUMAN    | 3   | 40 | 76 | 33 | 0.162604   | 0.182994487   | 0.063210834  | 0.020390523  | -0.099393129 | -0.119783652 | 0.745388317 | 0.00957029  | 0.00026773  |
| sp P12111 CO6A3_HUMAN  | 2   | 40 | 76 | 33 | 0.259411   | 0.248207361   | 0.436117517  | -0.011203398 | 0.176706758  | 0.187910157  | 0.966518255 | 0.003982036 | 0.000417269 |
| sp P33241 LSP1_HUMAN   | 1   | 7  | 14 | 6  | 0.160112   | 0.089628174   | 0.148445503  | -0.070484254 | -0.011666929 | 0.058817329  | 0.835969437 | 0.893969437 | 0.990601947 |
| sp Q13683 ITAT_HUMAN   | 2   | 40 | 76 | 33 | 0.175567   | 0.116525728   | -0.141681897 | -0.059040987 | -0.317248612 | -0.258207625 | 0.45492308  | 9.62E-07    | 6.91E-06    |
| sp P22352 GPX3_HUMAN   | 3   | 40 | 76 | 33 | 0.186247   | 0.062020428   | -0.000133185 | -0.110226496 | -0.186380109 | -0.076153613 | 0.036800153 | 0.001794656 | 0.243861448 |
| sp Q6UWV8 SBSN_HUMAN   | 3   | 40 | 76 | 33 | 0.128392   | 0.032471539   | 0.192044829  | -0.095920271 | 0.06353062   | 0.15957329   | 0.184206814 | 0.594283244 | 0.018057812 |
| sp Q15942 ZYX_HUMAN    | 1   | 40 | 76 | 33 | 0.061643   | -0.061582917  | 0.184657447  | -0.123226381 | 0.123013982  | 0.246240364  | 0.472700885 | 0.596610487 | 0.075808866 |
| sp P16112 PGCA_HUMAN   | 2   | 40 | 76 | 33 | 0.120408   | 0.047411085   | -0.195512166 | -0.072996963 | -0.315920214 | -0.242923251 | 0.305892765 | 1.24E-06    | 2.70E-05    |
| sp P34096 RNAS4_HUMAN  | 1   | 40 | 76 | 33 | 0.031062   | 0.107663423   | 0.310186705  | 0.076601313  | 0.279124595  | 0.202523282  | 0.126452331 | 6.40E-08    | 9.30E-06    |
| sp Q13822 ENPP2_HUMAN  | 6   | 40 | 76 | 33 | 0.295282   | 0.286834707   | 0.146039511  | -0.008447639 | -0.149242836 | -0.140795196 | 0.987241725 | 0.067973209 | 0.048115253 |
| sp P09172 DOPO_HUMAN   | 1   | 40 | 76 | 33 | 0.290453   | 0.200814238   | -0.105175728 | -0.089639221 | -0.395629197 | -0.305989966 | 0.563874607 | 0.00074341  | 0.00380883  |
| sp Q6GTS8 P20D1_HUMAN  | 25  | 40 | 76 | 33 | -0.09134   | -0.258556455  | -0.090769695 | -0.167213661 | 0.000573094  | 0.167786761  | 0.56845506  | 0.999995394 | 0.60673456  |
| sp Q00299 CLIC1_HUMAN  | 12  | 40 | 76 | 33 | -0.0897    | -0.03383157   | 0.19268642   | 0.055869176  | 0.282387165  | 0.22651799   | 0.905713895 | 0.177975514 | 0.244248481 |
| sp Q13093 PAPA_HUMAN   | 8   | 40 | 76 | 33 | 0.015804   | 0.173443181   | 0.327285946  | 0.157639409  | 0.311482174  | 0.153842765  | 0.141615145 | 0.006991946 | 0.190011659 |
| sp Q6GMZM IHPH1_HUMAN  | 18  | 40 | 76 | 33 | 0.195469   | 0.136686713   | 0.090204251  | -0.058782485 | -0.186264948 | -0.127482463 | 0.592876829 | 0.029631111 | 0.119694921 |
| sp P62937 PIPA_HUMAN   | 14  | 40 | 76 | 33 | 0.047132   | -0.01032778   | 0.206061682  | -0.057459705 | 0.248929756  | 0.306389462  | 0.788667249 | 0.049030685 | 0.003477209 |
| sp P19961 AMY2B_HUMAN  | 9   | 40 | 76 | 33 | 0.112982   | 0.052298145   | -0.031364419 | -0.06068389  | -0.126146454 | -0.065462564 | 0.650019805 | 0.280017892 | 0.643999468 |
| sp P55056 APOC4_HUMAN  | 23  | 40 | 76 | 33 | 0.151037</ |               |              |              |              |              |             |             |             |

|                       |      |    |    |    |          |              |              |              |              |              |             |             |             |
|-----------------------|------|----|----|----|----------|--------------|--------------|--------------|--------------|--------------|-------------|-------------|-------------|
| sp P49257 LMAN1_HUMAN | 1677 | 40 | 76 | 33 | -0.10139 | 0.013108577  | -0.010789061 | 0.114500545  | 0.090602907  | -0.023897638 | 0.291653348 | 0.584928698 | 0.953398409 |
| sp P06312 KV01_HUMAN  | 190  | 40 | 76 | 33 | -0.22804 | -0.037852202 | 0.227069582  | 0.190187765  | 0.455109549  | 0.264921784  | 0.107231539 | 0.000245748 | 0.62325917  |
| sp P01615 KVD28_HUMAN | 292  | 10 | 21 | 9  | -0.07677 | 0.185804633  | 0.056648376  | 0.262577648  | 0.142421391  | -0.120156257 | 0.167799057 | 0.68166699  | 0.095888426 |
| sp P01860 IGHG3_HUMAN | 7    | 40 | 76 | 33 | -0.40038 | -0.335915716 | -0.060101479 | 0.064490696  | 0.340283296  | 0.275814237  | 0.864286945 | 0.06520972  | 0.10113171  |
| sp P06310 KV230_HUMAN | 252  | 32 | 62 | 27 | -0.29067 | -0.202347706 | -0.304109303 | 0.088326579  | -0.013435018 | -0.101761598 | 0.537887714 | 0.99020831  | 0.480708491 |
| sp O14791 APOL1_HUMAN | 28   | 40 | 76 | 33 | -0.2087  | 0.037393493  | 0.143414573  | 0.246090777  | 0.352111857  | 0.10602108   | 0.008710675 | 0.001386032 | 0.447198991 |
| sp O00241 SIRB1_HUMAN | 123  | 36 | 69 | 30 | -0.12119 | -0.143336145 | 0.250726036  | -0.022144470 | 0.371917472  | 0.394062181  | 0.962308553 | 0.000954283 | 6.10E-05    |
| sp P78324 SHP51_HUMAN | 1    | 40 | 76 | 33 | -0.07951 | 0.016233511  | 0.276750168  | 0.095746539  | 0.356263193  | 0.260516658  | 0.37506575  | 0.000169713 | 0.002344793 |
| sp Q9H487 TBB1_HUMAN  | 631  | 40 | 76 | 33 | -0.28316 | -0.09068047  | 0.03890709   | 0.192475116  | 0.322062737  | 0.129587561  | 0.178090931 | 0.037613461 | 0.499477496 |
| sp P04433 KV311_HUMAN | 21   | 32 | 62 | 27 | -0.08358 | 0.01381066   | 0.042045839  | 0.0973916    | 0.125626779  | 0.028235179  | 0.358980834 | 0.030713719 | 0.925304518 |
| sp P01619 KV320_HUMAN | 7    | 40 | 76 | 33 | 0.005591 | 0.038841551  | 0.357811861  | 0.033250529  | 0.352220839  | 0.31897031   | 0.920426958 | 0.002377726 | 0.001855212 |
| sp Q86Y03 TMM25_HUMAN | 39   | 40 | 76 | 33 | 0.157941 | 0.066713533  | -0.150530981 | -0.092226986 | -0.3084715   | -0.216244513 | 0.101269879 | 1.65E-07    | 3.58E-07    |
| sp Q02325 PLGB_HUMAN  | 77   | 40 | 76 | 33 | 0.183319 | 0.217555616  | 0.045242553  | 0.034236655  | -0.138076408 | -0.172313063 | 0.56783938  | 0.002454732 | 1.19E-05    |
| sp Q15195 PLGA_HUMAN  | 62   | 29 | 56 | 24 | -2.97275 | -3.094563362 | -3.070406165 | -0.121816065 | -0.097658867 | 0.024157198  | 0.958336961 | 0.981370551 | 0.998528692 |
| sp O14594 NCAN_HUMAN  | 729  | 40 | 76 | 33 | 0.089593 | 0.02599      | -0.162109576 | -0.063602755 | -0.251702331 | -0.188099576 | 0.425036441 | 0.000190564 | 0.001982686 |
| sp O14767 LTBP2_HUMAN | 6    | 40 | 76 | 33 | -0.31773 | -0.405560703 | 0.388531702  | -0.087929074 | 0.706263332  | 0.794192406  | 0.61092488  | 5.40E-09    | 5.10E-13    |
| sp P16070 CD44_HUMAN  | 7    | 40 | 76 | 33 | 0.10818  | 0.094760603  | 0.206753098  | -0.013419067 | 0.098573429  | 0.111992495  | 0.938467685 | 0.099338186 | 0.023799429 |
| sp Q13103 SPP24_HUMAN | 1    | 40 | 76 | 33 | 0.065319 | 0.165311551  | -0.032769947 | 0.0999921    | -0.098089398 | -0.198081498 | 0.687667519 | 0.779613652 | 0.278635192 |
| sp O95980 RECK_HUMAN  | 25   | 40 | 76 | 33 | 0.177645 | 0.148928799  | -0.080807647 | -0.028716078 | -0.258452524 | -0.229736446 | 0.703091814 | 4.74E-08    | 4.38E-08    |
| sp O58873 ENPLL_HUMAN | 140  | 7  | 14 | 6  | 0.313298 | 0.171936538  | 0.340892539  | -0.141361138 | 0.027594864  | 0.168956001  | 0.421674854 | 0.006602852 | 0.333437195 |
| sp Q8N376 T132C_HUMAN | 326  | 40 | 76 | 33 | 0.181032 | 0.135252286  | 0.086119931  | -0.045719931 | -0.094912308 | -0.049132354 | 0.455170363 | 0.979462062 | 0.01418186  |
| sp P06702 S10A9_HUMAN | 3    | 40 | 76 | 33 | -0.71468 | -0.409084213 | 0.370249465  | 0.035592403  | 0.1084926081 | 0.779333678  | 0.165734223 | 8.84E-07    | 7.34E-05    |
| sp Q04895 XPP2_HUMAN  | 8    | 40 | 76 | 33 | 0.012251 | -0.11402998  | -0.198241656 | -0.126281266 | -0.210492942 | -0.084211676 | 0.583610535 | 0.358068355 | 0.809779194 |
| sp P20023 CR2_HUMAN   | 372  | 40 | 76 | 33 | 0.017651 | 0.14266669   | -0.224836922 | 0.12501561   | -0.242488003 | -0.367503612 | 0.217497384 | 0.020935203 | 2.49E-05    |
| sp P48551 INAR2_HUMAN | 379  | 37 | 69 | 29 | -0.21305 | -0.15747271  | 0.353901664  | 0.055579051  | 0.566953425  | 0.511374374  | 0.809918608 | 2.32E-06    | 1.81E-06    |
| sp Q86YV5 TRML1_HUMAN | 55   | 40 | 76 | 33 | -0.29076 | -0.051606418 | 0.15021234   | 0.2391156    | 0.440979012  | 0.201827652  | 0.04162989  | 0.000768044 | 0.133745607 |
| sp P16562 CRIS2_HUMAN | 4    | 40 | 76 | 33 | 0.060521 | -0.03674567  | 0.100118699  | -0.097266987 | -0.050402619 | 0.046864369  | 0.165929488 | 0.712325372 | 0.689605315 |
| sp Q9UI88 SLAF5_HUMAN | 11   | 40 | 76 | 33 | 0.063807 | 0.127551895  | 0.234294002  | 0.063744747  | 0.170486855  | 0.106742108  | 0.273903212 | 0.002265526 | 0.043794982 |
| sp P15085 CBP1_HUMAN  | 30   | 40 | 76 | 33 | -0.13251 | -0.123465113 | 0.06449819   | 0.009043266  | 0.138958198  | 0.129914932  | 0.996088646 | 0.50373799  | 0.4941946   |
| sp P07737 PROF1_HUMAN | 75   | 40 | 76 | 33 | 0.130939 | -0.003353463 | 0.350405248  | -0.134292294 | 0.219466416  | 0.353758711  | 0.5894748   | 0.379310393 | 0.043547763 |
| sp Q9V627 COL10_HUMAN | 39   | 40 | 76 | 33 | 0.087338 | 0.176788009  | 0.116578377  | 0.089450285  | 0.029240654  | -0.060209632 | 0.085540467 | 0.830552409 | 0.370413466 |
| sp P39060 COIA1_HUMAN | 7    | 40 | 76 | 33 | -0.02142 | 0.067809576  | 0.391590075  | 0.089231641  | 0.413012139  | 0.323780498  | 0.257707031 | 3.10E-08    | 9.05E-07    |
| sp Q15084 PDI6A_HUMAN | 13   | 40 | 76 | 33 | -0.08837 | -0.026439989 | 0.379272558  | 0.06193696   | 0.467646243  | 0.405712547  | 0.825435815 | 0.000873733 | 0.001155566 |
| sp B2RNN3 C1798_HUMAN | 2    | 32 | 63 | 27 | 0.117717 | 0.056655354  | -0.028265152 | -0.061613431 | -0.145981937 | -0.084920506 | 0.563460265 | 0.540016789 | 0.761394694 |
| sp Q9H247 CX16_HUMAN  | 2674 | 40 | 76 | 33 | -0.06122 | -0.023393325 | 0.160473956  | 0.037822931  | 0.221690212  | 0.183867281  | 0.822639534 | 0.01191498  | 0.020277065 |
| sp Q9Y279 VSI6A_HUMAN | 3    | 40 | 76 | 33 | -0.69033 | -0.622211852 | 0.294831233  | 0.06811592   | 0.985159005  | 0.917043085  | 0.882456936 | 1.70E-07    | 4.20E-08    |
| sp O00855 CCL21_HUMAN | 2    | 40 | 76 | 33 | -0.09226 | 0.110073337  | 0.451621559  | 0.202323084  | 0.543871305  | 0.341539222  | 0.019994034 | 3.15E-08    | 9.19E-05    |
| sp P68489 NOMO3_HUMAN | 7    | 40 | 76 | 33 | 0.059133 | 0.099883958  | 0.203753252  | 0.040750274  | 0.144619928  | 0.103869653  | 0.508601394 | 0.003739019 | 0.023837694 |
| sp P51693 APL1_HUMAN  | 9    | 40 | 76 | 33 | 0.155975 | 0.004386748  | 0.174001974  | -0.151587796 | -0.330376519 | -0.178788722 | 0.019576832 | 6.43E-06    | 0.008527466 |
| sp P81172 HEPC_HUMAN  | 32   | 36 | 69 | 30 | 0.025926 | -0.032810453 | -0.120257848 | -0.05873678  | 0.094331521  | 0.153068301  | 0.716037665 | 0.552028317 | 0.139684832 |
| sp Q01459 DIA_C_HUMAN | 246  | 40 | 76 | 33 | 0.14634  | 0.138140988  | -0.087077499 | -0.008199079 | -0.227417562 | -0.219218487 | 0.98394502  | 0.000357816 | 9.44E-05    |
| sp O91091 AC16A_HUMAN | 3    | 8  | 14 | 5  | 0.013447 | -0.486654504 | -0.386623781 | -0.500118115 | -0.380071056 | 0.120030723  | 0.078971701 | 0.385469941 | 0.888439943 |
| sp P02654 APOC1_HUMAN | 304  | 40 | 76 | 33 | 0.447107 | 0.200978877  | 0.561456897  | -0.246128541 | 0.114349479  | 0.36047802   | 0.077783237 | 0.677692435 | 0.009037536 |
| sp P40306 PSB10_HUMAN | 2    | 40 | 76 | 33 | -0.36068 | -0.215363302 | 0.19675991   | 0.145313965  | 0.557436368  | 0.412122402  | 0.298004907 | 1.15E-05    | 0.000290107 |
| sp Q99436 PSB7_HUMAN  | 1    | 40 | 76 | 33 | -0.41317 | -0.231017016 | 0.417760503  | 0.182156932  | 0.830934451  | 0.648777519  | 0.299516637 | 2.56E-07    | 5.80E-06    |
| sp P43121 MUC18_HUMAN | 40   | 40 | 76 | 33 | 0.336822 | 0.131489729  | -0.280136233 | -0.205332612 | -0.344958574 | -0.139625962 | 1.08E-05    | 1.14E-09    | 0.007198892 |
| sp Q96961 LEAP2_HUMAN | 1    | 40 | 76 | 33 | -0.53768 | -0.429433881 | -0.002060607 | 0.108248658  | 0.817888606  | 0.709639948  | 0.57093474  | 3.90E-06    | 6.27E-06    |
| sp Q02747 GUC2A_HUMAN | 381  | 40 | 76 | 33 | -0.0344  | -0.131053044 | 0.205266188  | -0.096657833 | 0.239661399  | 0.336319322  | 0.41779866  | 0.027344055 | 0.000185176 |
| sp Q8WVA0 ITLN1_HUMAN | 72   | 40 | 76 | 33 | 0.0891   | -0.195517499 | -0.099601003 | -0.284617331 | -0.188700845 | 0.095916496  | 0.066705009 | 0.432873405 | 0.758110403 |
| sp Q9Y4D7 PLXD1_HUMAN | 2    | 40 | 76 | 33 | 0.096034 | 0.088971213  | 0.094455263  | -0.007063216 | 0.003420835  | 0.01048405   | 0.968589254 | 0.994846667 | 0.940150907 |
| sp P29401 TKT_HUMAN   | 7    | 40 | 76 | 33 | -0.23076 | -0.097539221 | 0.444908999  | 0.133223384  | 0.679861604  | 0.54663822   | 0.344189056 | 0.36E-08    | 8.74E-07    |
| sp P60174 TPIS_HUMAN  | 34   | 40 | 76 | 33 | -0.07552 | -0.015742368 | 0.279393454  | 0.059773455  | 0.354909277  | 0.295135822  | 0.792630668 | 0.004826991 | 0.00866387  |
| sp Q81X6 FA20C_HUMAN  | 26   | 40 | 76 | 33 | 0.124104 | 0.105862179  | 0.089258629  | -0.018241769 | -0.034845319 | -0.01660355  | 0.723962316 | 0.046528692 | 0.790435098 |
| sp Q9UIJ9 GNPTG_HUMAN | 1    | 40 | 76 | 33 | 0.008504 | 0.045360364  | 0.232888238  | 0.036856087  | 0.215383961  | 0.178527875  | 0.555755428 | 4.30E-06    | 1.77E-05    |
| sp P08253 MMP2_HUMAN  | 8    | 40 | 76 | 33 | 0.206613 | 0.171547436  | 0.182229219  | -0.035065234 | -0.024838452 | 0.010681782  | 0.698529778 | 0.886914266 | 0.971091777 |
| sp O00151 PDIJ_HUMAN  | 2    | 40 | 76 | 33 | -0.05322 | -0.319696054 | 0.042158885  | -0.266477613 | 0.095377326  | 0.361854939  | 0.207086893 | 0.868221613 | 0.080118779 |
| sp P353004 BIEA_HUMAN | 7    | 40 | 76 | 33 | -0.2009  | -0.055552402 | 0.207292025  | 0.145531138  | 0.408196565  | 0.262844427  | 0.145358996 | 5.96E-05    | 0.00475167  |
| sp P02775 CXCL7_HUMAN | 13   | 40 | 76 | 33 | -0.38681 | 0.072136497  | 0.212920533  | 0.458950643  | 0.399314476  | -0.059636167 | 0.000399416 | 0.014524234 | 0.88221253  |
| sp P04066 FUCO_HUMAN  | 4    | 40 | 76 | 33 | 0.198694 | 0.132220063  | 0.315989101  | -0.06647394  | 0.117295099  | 0.183769039  | 0.431428157 | 0.167280075 | 0.004580844 |
| sp Q98YH1 SEGL1_HUMAN | 3    | 40 | 76 | 33 | 0.214811 | 0.162457878  | 0.041650306  | -0.052352781 | -0.173160352 | -0.120807572 | 0.380056215 | 0.01026333  | 0.016782026 |
| sp Q9H86B CDHR5_HUMAN | 7    | 40 | 76 | 33 | 0.179966 | 0.218424572  | 0.137772142  | 0.03845872   | -0.042193709 | -0.08065243  | 0.172336716 | 0.754361969 | 0.274734114 |
| sp Q98Y67 CADM1_HUMAN | 2    | 40 | 76 | 33 | 0.205371 | 0.189052077  | 0.204181075  | 0.0316319255 | -0.001190258 | 0.015128997  | 0.934836197 | 0.999752524 | 0.950415926 |
| sp P54802 ANAG_HUMAN  | 1    | 40 | 76 | 33 | 0.183583 | 0.156264978  | 0.092865613  | -0.027318064 | -0.090717428 | -0.063399365 | 0.872879119 | 0.358886182 | 0.527565855 |
| sp Q9UBR2 CATZ_HUMAN  | 32   | 40 | 76 | 33 | -0.1116  | -0.092029363 | 0.152892575  | 0.01956672   | 0.264488658  | 0.244921938  | 0.927182402 | 0.00015953  | 7.67E-05    |
| sp P55058 PLT2_HUMAN  | 5    | 40 | 76 | 33 | 0.033958 | 0.067737381  | 0.247699168  | 0.033779156  | 0.213740944  | 0.179961788  | 0.732708233 | 0.000263005 | 0.000554064 |
| sp P49641 MA          |      |    |    |    |          |              |              |              |              |              |             |             |             |

|                        |     |    |    |    |          |              |              |              |              |              |             |             |             |
|------------------------|-----|----|----|----|----------|--------------|--------------|--------------|--------------|--------------|-------------|-------------|-------------|
| sp Q15833 STXB2_HUMAN  | 11  | 40 | 76 | 33 | 0.019239 | -0.149283798 | -0.006284893 | -0.168522833 | -0.025523929 | 0.142998904  | 0.314275532 | 0.981627547 | 0.479504913 |
| sp Q9U0Q0 PAZG4_HUMAN  | 2   | 40 | 76 | 33 | -0.24792 | -0.229954693 | 0.176146855  | 0.017969167  | 0.319570715  | 0.301601547  | 0.978743111 | 0.011357274 | 0.00642988  |
| sp Q8UWU3 CEMIP_HUMAN  | 5   | 40 | 76 | 33 | -0.07853 | -0.04207654  | 0.297640268  | 0.036450108  | 0.376166091  | 0.339716808  | 0.726560016 | 2.96E-09    | 1.57E-09    |
| sp P80511 S10AC_HUMAN  | 419 | 36 | 69 | 30 | -1.39417 | -1.11856894  | -0.245439346 | 0.275630294  | 1.148733789  | 0.873130494  | 0.416326916 | 6.75E-05    | 0.000704237 |
| sp P08319 ADH4_HUMAN   | 3   | 40 | 76 | 33 | -0.65984 | -0.339475607 | -0.091729393 | 0.320362015  | 0.568108229  | 0.247746214  | 0.057242696 | 0.002441923 | 0.21806519  |
| sp Q8N826 DCBD1_HUMAN  | 2   | 40 | 76 | 33 | -0.01986 | 0.002329385  | 0.106028295  | 0.022191117  | 0.125890028  | 0.10369891   | 0.750121677 | 0.002422984 | 0.005300981 |
| sp Q43747 AP1G1_HUMAN  | 269 | 29 | 55 | 24 | 0.049718 | -0.191307166 | -0.181454247 | -0.241024694 | -0.231171755 | 0.009852919  | 0.194226623 | 0.349698127 | 0.997540303 |
| sp P54920 SNAA_HUMAN   | 27  | 40 | 76 | 33 | -0.20573 | -0.225879349 | 0.177602422  | -0.020154247 | 0.383327523  | 0.40348171   | 0.976263741 | 0.000481912 | 0.00040284  |
| sp P09417 DHPR_HUMAN   | 282 | 40 | 76 | 33 | 0.058336 | 0.100538337  | 0.340296879  | 0.042199519  | 0.281960562  | 0.239761043  | 0.792050432 | 0.001200737 | 0.001939375 |
| sp P08727 K1C19_HUMAN  | 4   | 14 | 28 | 12 | -0.21435 | -0.631172412 | -0.675206059 | -0.416823995 | -0.460857642 | -0.044033647 | 0.598206194 | 0.646845012 | 0.994790638 |
| sp P17181 INAR1_HUMAN  | 1   | 36 | 69 | 30 | 0.149187 | 0.053800421  | 0.081917846  | -0.095386824 | -0.067215399 | 0.028171426  | 0.082172415 | 0.417279165 | 0.820623349 |
| sp Q8N4F0 BPIB2_HUMAN  | 29  | 15 | 28 | 12 | 0.01672  | -0.19040573  | 0.865449376  | -0.207125826 | 0.84872928   | 1.05855106   | 0.671010857 | 0.015104739 | 0.000511432 |
| sp P25787 PSA2_HUMAN   | 39  | 40 | 76 | 33 | -0.53475 | -0.397245882 | 0.177564758  | 0.137502617  | 0.712313257  | 0.57481064   | 0.434741215 | 1.18E-06    | 9.89E-06    |
| sp P42765 THIM_HUMAN   | 3   | 40 | 76 | 33 | -0.49653 | -0.356524431 | 0.179779995  | 0.140009689  | 0.676314115  | 0.536304425  | 0.558596954 | 0.000174473 | 0.000884359 |
| sp Q8N436 CPXM2_HUMAN  | 35  | 28 | 55 | 24 | -1.09592 | -1.076525019 | -0.5669982   | 0.019396656  | 0.528923475  | 0.509526819  | 0.987304867 | 0.00221221  | 0.000721121 |
| sp Q13449 LSAMP_HUMAN  | 32  | 40 | 76 | 33 | 0.142031 | 0.030251564  | -0.022141601 | -0.11177894  | -0.164172104 | -0.052393164 | 0.026414641 | 0.004898706 | 0.485598936 |
| sp Q9Y4V1 HYOU1_HUMAN  | 1   | 40 | 76 | 33 | 0.009288 | 0.057160359  | 0.25878506   | 0.047872111  | 0.249496812  | 0.201624701  | 0.434607229 | 1.01E-06    | 8.42E-06    |
| sp P08590 MYL3_HUMAN   | 12  | 36 | 69 | 30 | -0.29039 | -2.27048972  | -1.735967855 | -0.18055782  | 0.354425335  | 0.534981117  | 0.54858317  | 0.205427436 | 0.011506822 |
| sp Q9Y639 NPTN_HUMAN   | 14  | 4  | 6  | 3  | 0.557826 | 0.238293572  | 0.453853222  | -0.319532804 | -0.103973154 | 0.215559651  | 0.230350886 | 0.54312262  | 0.54312262  |
| sp Q43058 TNF12_HUMAN  | 7   | 15 | 28 | 12 | 0.43171  | 0.392749971  | 0.05919376   | -0.038959642 | -0.025790237 | 0.013169404  | 0.949463667 | 0.984596329 | 0.994911607 |
| sp P11216 PYVG_B_HUMAN | 20  | 40 | 76 | 33 | -0.04684 | -0.10683617  | 0.339929218  | -0.059999741 | 0.386767977  | 0.446765388  | 0.84845404  | 0.011045911 | 0.000589571 |
| sp Q92823 NRCAM_HUMAN  | 3   | 40 | 76 | 33 | 0.063941 | 0.049185724  | 0.071900354  | -0.014755587 | 0.007959043  | 0.02271463   | 0.955221635 | 0.990842084 | 0.909132326 |
| sp Q94856 NFASC_HUMAN  | 13  | 29 | 55 | 24 | -0.11245 | -0.286263705 | -0.07848941  | -0.17380926  | 0.03965035   | 0.207774295  | 0.28856391  | 0.967193863 | 0.210891739 |
| sp Q15828 CYTM_HUMAN   | 7   | 40 | 76 | 33 | 0.044668 | -0.029915717 | 0.1017499344 | -0.074583461 | -0.027168401 | 0.047415061  | 0.246708225 | 0.878208743 | 0.605710722 |
| sp P37837 TALDO_HUMAN  | 11  | 40 | 76 | 33 | -0.16175 | -0.063965472 | 0.501549889  | 0.097783757  | 0.663299118  | 0.565515361  | 0.525782325 | 2.64E-08    | 8.35E-08    |
| sp P0DN79 CBSL_HUMAN   | 26  | 26 | 48 | 20 | -0.67358 | -0.156934884 | 0.158366731  | 0.516649794  | 0.831951408  | 0.315301614  | 0.005785066 | 0.00194087  | 0.184908616 |
| sp P12318 FCG2A_HUMAN  | 11  | 40 | 76 | 33 | -0.01777 | -0.026962457 | 0.098989126  | -0.009192094 | 0.116761288  | 0.125953382  | 0.986096085 | 0.215710412 | 0.10495275  |
| sp Q75071 EFC14_HUMAN  | 2   | 20 | 34 | 14 | -0.09069 | -0.044049664 | 0.437566819  | 0.046282939  | 0.528254722  | 0.481971783  | 0.967037076 | 0.066235079 | 0.065914744 |
| sp P07942 LAMB1_HUMAN  | 5   | 40 | 76 | 33 | 0.036503 | 0.029714388  | 0.21193838   | -0.006788594 | 0.175435398  | 0.182223992  | 0.985808081 | 0.002503915 | 0.000433221 |
| sp Q75112 LDB3_HUMAN   | 238 | 10 | 20 | 9  | -0.74525 | -0.825486623 | -0.07669257  | -0.080238309 | 0.668549056  | 0.748787365  | 0.97947616  | 0.375698005 | 0.206204894 |
| sp Q8WVQ8 STAB2_HUMAN  | 39  | 40 | 76 | 33 | -0.03356 | -0.01701659  | -0.031147537 | 0.022856677  | 0.002410799  | -0.020445878 | 0.815513644 | 0.998432423 | 0.866436176 |
| sp P09525 ANKAA_HUMAN  | 4   | 40 | 76 | 33 | 0.425433 | 0.378029922  | 0.590869299  | -0.047403266 | 0.165436111  | 0.212839377  | 0.903717933 | 0.429945051 | 0.1719159   |
| sp Q9Y3F4 STRAP_HUMAN  | 14  | 40 | 76 | 33 | -0.28398 | -0.094441602 | 0.140044064  | 0.189559222  | 0.424415964  | 0.234856742  | 0.124219086 | 0.01020955  | 0.061382397 |
| sp P80303 NUCB2_HUMAN  | 2   | 40 | 76 | 33 | 0.152503 | 0.1243417    | 0.399721615  | -0.028161628 | 0.244718287  | 0.727899115  | 0.921504004 | 0.016804745 | 0.019191615 |
| sp P48594 SPB4_HUMAN   | 5   | 17 | 34 | 16 | -0.13451 | -0.387044132 | -0.656662688 | -0.252529594 | -0.52214815  | -0.269618556 | 0.591012768 | 0.201596531 | 0.562718898 |
| sp P11766 ADHX_HUMAN   | 24  | 40 | 76 | 33 | -0.0777  | -0.04336476  | 0.240916126  | 0.034338737  | 0.318619624  | 0.284280887  | 0.913113757 | 0.005926126 | 0.005566276 |
| sp Q8NDA2 HMCN2_HUMAN  | 35  | 40 | 76 | 33 | 0.109385 | 0.111681282  | -0.164877719 | 0.002296298  | -0.274262703 | -0.276559001 | 0.999219716 | 0.000786683 | 0.000111364 |
| sp Q9H2X3 CLC4M_HUMAN  | 3   | 40 | 76 | 33 | -0.1489  | -0.082870931 | 0.074736937  | 0.066031646  | 0.223639514  | 0.157607869  | 0.46081989  | 0.002951152 | 0.023385251 |
| sp P13176 HEM2_HUMAN   | 311 | 40 | 76 | 33 | -0.08511 | 0.036628935  | 0.35106773   | 0.121736565  | 0.43617536   | 0.314438794  | 0.335737817 | 0.000130089 | 0.002290035 |
| sp P07327 ADH1A_HUMAN  | 290 | 40 | 76 | 33 | -0.54792 | -0.249229489 | 0.011009361  | 0.298687993  | 0.558926842  | 0.26023885   | 0.094130617 | 0.003962561 | 0.204395991 |
| sp Q9Y2E5 MA2B2_HUMAN  | 36  | 40 | 76 | 33 | 0.002866 | -0.033141523 | 0.043689117  | -0.036007702 | 0.040822938  | 0.067380364  | 0.875846495 | 0.889056419 | 0.589980919 |
| sp Q9HBV9 ACR14_HUMAN  | 91  | 40 | 76 | 33 | 0.051385 | -0.04905798  | -0.0505373   | -0.10044273  | -0.101922051 | -0.00147932  | 0.346221606 | 0.469544752 | 0.999795726 |
| sp P04083 ANKA1_HUMAN  | 29  | 40 | 76 | 33 | -0.93261 | -0.61537317  | 0.017196012  | 0.317241723  | 0.949810905  | 0.632569182  | 0.097516124 | 2.23E-06    | 0.000448989 |
| sp Q9Y623 MYH4_HUMAN   | 3   | 40 | 76 | 33 | 0.155193 | 0.023616799  | -0.003813989 | -0.131576205 | -0.159060993 | -0.027430788 | 0.000497174 | 0.000471172 | 0.731779221 |
| sp Q14563 SEM3A_HUMAN  | 1   | 40 | 76 | 33 | -0.01549 | -0.040666891 | -0.027679955 | -0.032577471 | 0.039169374  | 0.071746845  | 0.694897198 | 0.695538923 | 0.216307322 |
| sp P07911 UROM_HUMAN   | 20  | 40 | 76 | 33 | 0.17847  | 0.028228941  | -0.040505537 | -0.096180624 | -0.223475571 | -0.127294947 | 0.464988134 | 0.06125235  | 0.309516266 |
| sp P00558 PGK1_HUMAN   | 19  | 40 | 76 | 33 | -0.05701 | -0.010520251 | 0.379054069  | 0.046492596  | 0.436066916  | 0.38957432   | 0.890337486 | 0.01357911  | 0.000123618 |
| sp Q9Y539 BMP10_HUMAN  | 9   | 40 | 76 | 33 | 0.120323 | -0.030459694 | -0.037028053 | -0.15078288  | -0.157351328 | -0.006568358 | 0.010236279 | 0.030778811 | 0.992029176 |
| sp Q9H939 PPIP2_HUMAN  | 9   | 40 | 76 | 33 | -0.49706 | -0.434273998 | -0.293924571 | 0.062781623  | 0.203131205  | 0.140349427  | 0.911715413 | 0.515016915 | 0.667511662 |
| sp P121860 ERBB3_HUMAN | 7   | 40 | 76 | 33 | 0.302063 | 0.311005564  | 0.043626096  | 0.008942989  | -0.258436479 | -0.267379468 | 0.989311463 | 0.002925044 | 0.000410018 |
| sp Q02763 TIE2_HUMAN   | 28  | 40 | 76 | 33 | 0.030214 | 0.031708326  | 0.021568467  | 0.001494624  | -0.008645235 | -0.010139859 | 0.998927968 | 0.957610651 | 0.957610651 |
| sp Q14847 LAMP1_HUMAN  | 22  | 40 | 76 | 33 | 0.005907 | -0.032363878 | 0.231794945  | -0.038277043 | 0.22588389   | 0.264158823  | 0.907338404 | 0.101849862 | 0.020044994 |
| sp P22234 PUR6_HUMAN   | 12  | 22 | 42 | 18 | -0.33635 | -0.135437843 | 0.382180622  | 0.200888131  | 0.718506596  | 0.517618465  | 0.333455956 | 0.000190388 | 0.000254873 |
| sp P49407 ARRB1_HUMAN  | 26  | 40 | 76 | 33 | -0.1131  | -0.157744711 | 0.038413053  | -0.044648681 | 0.151509083  | 0.196157764  | 0.943900214 | 0.633337149 | 0.379478908 |
| sp P222897 MRC1_HUMAN  | 15  | 40 | 76 | 33 | 0.040948 | 0.034831908  | 0.67623928   | -0.066112827 | 0.635291084  | 0.641407371  | 0.996591001 | 5.35E-09    | 4.78E-11    |
| sp Q96HD1 CREL1_HUMAN  | 7   | 40 | 76 | 33 | -0.03157 | 0.034645991  | 0.407541958  | 0.066212961  | 0.439108929  | 0.372895968  | 0.579822678 | 5.11E-07    | 1.49E-06    |
| sp P12814 ACTN1_HUMAN  | 3   | 40 | 76 | 33 | 0.121978 | -0.19590492  | 0.097079388  | 0.317882485  | -0.042898177 | 0.274984409  | 0.125548844 | 0.973708055 | 0.252360602 |
| sp Q43707 ACTN4_HUMAN  | 19  | 40 | 76 | 33 | 0.034075 | -0.241070796 | 0.089005531  | -0.275145646 | 0.055725682  | 0.330871327  | 0.142457906 | 0.945287744 | 0.085343382 |
| sp P13929 ENOB_HUMAN   | 32  | 40 | 76 | 33 | 0.190285 | 0.224427186  | 0.281298561  | 0.03396246   | 0.091013834  | 0.057051375  | 0.866779614 | 0.494500899 | 0.702283557 |
| sp Q9H8J5 MAN5B_HUMAN  | 4   | 40 | 76 | 33 | 0.035992 | 0.08162125   | 0.208510474  | 0.056429189  | 0.172518413  | 0.126889224  | 0.623880504 | 0.041492882 | 0.044319846 |
| sp Q00451 GFRA2_HUMAN  | 4   | 40 | 76 | 33 | -0.02915 | -0.034417515 | 0.077938431  | -0.005267311 | 0.107088636  | 0.112355946  | 0.994539478 | 0.215427449 | 0.117806351 |
| sp Q8NHP8 PLBL2_HUMAN  | 31  | 36 | 69 | 30 | 0.160471 | 0.07785425   | 0.30129576   | -0.082595829 | 0.140824506  | 0.223420335  | 0.581525276 | 0.33845037  | 0.033495316 |
| sp Q8WVZ8 OT3_HUMAN    | 69  | 40 | 76 | 33 | -0.09657 | 0.078302219  | 0.30558761   | 0.174877028  | 0.402156118  | 0.227285391  | 0.011335136 | 3.51E-07    | 0.001482724 |
| sp Q15197 EPHB6_HUMAN  | 7   | 8  | 13 | 6  | -0.05621 | -0.119564648 | 0.291999016  | -0.063446867 | 0.348208617  | 0.41655484   | 0.926152782 | 0.223429128 | 0.090230368 |
| sp Q6YKH3 CD109_HUMAN  | 9   | 40 | 76 | 33 | 0.300341 | 0.022069223  | -0.008263013 | -0.079649046 | -0.308604289 | -0.228955243 | 0.186121552 | 2.21E-07    | 1.          |

|                        |      |    |    |    |          |              |              |              |              |              |             |             |              |
|------------------------|------|----|----|----|----------|--------------|--------------|--------------|--------------|--------------|-------------|-------------|--------------|
| sp Q96979 WBP2_HUMAN   | 271  | 33 | 62 | 27 | -0.04655 | -0.122013732 | 0.245844017  | -0.075467834 | 0.292389915  | 0.367857749  | 0.709538452 | 0.032610349 | 0.001336972  |
| sp Q8W242 TITIN_HUMAN  | 32   | 40 | 76 | 33 | -0.55802 | -0.750884428 | -0.272877896 | -0.192862631 | 0.285143901  | 0.478006531  | 0.320851312 | 0.181892070 | 0.002891602  |
| sp P10721 KIT_HUMAN    | 4    | 40 | 76 | 33 | 0.227579 | 0.065943373  | -0.2789374   | -0.074556173 | -0.506515921 | -0.431954548 | 0.331019549 | 8.7E-13     | 4.7E-12      |
| sp P48163 MAOX_HUMAN   | 14   | 40 | 76 | 33 | 0.09831  | 0.145706107  | 0.240464727  | 0.047395807  | 0.142154427  | 0.09475862   | 0.650682698 | 0.073738804 | 0.225075673  |
| sp P01133 EGF_HUMAN    | 7    | 37 | 69 | 29 | 0.068944 | 0.127317933  | 0.186167797  | 0.05837423   | 0.117224094  | 0.058849864  | 0.554769359 | 0.204754788 | 0.601690974  |
| sp Q03252 LMNB2_HUMAN  | 14   | 4  | 7  | 3  | 0.151853 | -0.042170483 | 1.400324825  | -0.194023381 | 1.248471928  | 1.442495309  | 0.943967796 | 0.276382326 | 0.139931971  |
| sp P15086 CBP1_HUMAN   | 6    | 40 | 76 | 33 | -0.20066 | -0.180746662 | -0.011190155 | 0.10911474   | 0.189467981  | 0.169556507  | 0.976982339 | 0.238539303 | 0.232201113  |
| sp Q8TAB3 PCD19_HUMAN  | 2    | 7  | 14 | 6  | -0.05745 | -0.065943373 | 0.444724059  | 0.123391836  | 0.502172522  | 0.378780686  | 0.794582066 | 0.091842349 | 0.163106347  |
| sp Q92619 HMHAI1_HUMAN | 9    | 29 | 55 | 25 | 0.031913 | 0.08511729   | 0.478210129  | 0.053204705  | 0.446297545  | 0.39309284   | 0.91984715  | 0.01919265  | 0.019695153  |
| sp Q95425 SVIL_HUMAN   | 1    | 4  | 6  | 3  | 0.243317 | -0.226095433 | 1.218756274  | -0.469412821 | 0.975438885  | 1.444851707  | 0.786055073 | 0.094217023 | 0.019451679  |
| sp P55822 SH3BG_HUMAN  | 6    | 8  | 13 | 6  | -0.72666 | -1.103676684 | 0.510068638  | -0.377017995 | 1.236727327  | 1.613745322  | 0.812051649 | 0.231299955 | 0.060416466  |
| sp P09110 THIK_HUMAN   | 15   | 40 | 76 | 33 | -0.83751 | -0.665883193 | -0.152312728 | 0.171630225  | 0.685200669  | 0.513570465  | 0.496853652 | 0.000742053 | 0.0605251133 |
| sp P11234 RALB_HUMAN   | 10   | 24 | 49 | 21 | -0.01782 | 0.06399847   | 0.42918095   | 0.081820157  | 0.447002637  | 0.36518248   | 0.762044664 | 0.005253106 | 0.009680949  |
| sp Q9UHY7 ENOPH_HUMAN  | 67   | 14 | 27 | 11 | -0.00921 | -0.083043997 | 0.278227283  | -0.07383641  | 0.28743487   | 0.36127128   | 0.898392171 | 0.346426846 | 0.125750878  |
| sp P67936 TPM4_HUMAN   | 21   | 40 | 76 | 33 | -0.15415 | -0.336857936 | 0.020000705  | -0.18270918  | 0.156149461  | 0.338858641  | 0.595671209 | 0.769665516 | 0.212750521  |
| sp Q14315 FLNC_HUMAN   | 8    | 40 | 76 | 33 | -0.14132 | -0.12250901  | 0.088207162  | 0.018810572  | 0.229526744  | 0.210716172  | 0.953871061 | 0.009776602 | 0.007101676  |
| sp P29122 PCSK6_HUMAN  | 2    | 40 | 76 | 33 | -0.23033 | -0.025988119 | 0.181342163  | 0.204345809  | 0.411676091  | 0.207330282  | 0.014715123 | 1.5E-05     | 0.021752334  |
| sp Q9HCK4 ROBO2_HUMAN  | 12   | 40 | 76 | 33 | 0.029215 | 0.063280607  | 0.052478082  | 0.034065503  | 0.023262978  | -0.10802525  | 0.764267313 | 0.916978794 | 0.976483166  |
| sp Q16787 LAMA3_HUMAN  | 8    | 40 | 76 | 33 | 0.206064 | 0.141867202  | 0.070038279  | -0.064197247 | -0.1360211   | -0.071828923 | 0.4362144   | 0.080066578 | 0.402089397  |
| sp P53041 PPPS5_HUMAN  | 3    | 36 | 69 | 30 | -0.102   | 0.251524849  | 0.43397875   | 0.353521289  | 0.539597519  | 0.182453901  | 0.035700989 | 0.005549314 | 0.446258752  |
| sp Q96QK1 VPS35_HUMAN  | 2    | 40 | 76 | 33 | 0.163227 | 0.144359015  | 0.517396178  | -0.018867881 | 0.354169282  | 0.373037163  | 0.979837163 | 0.008935615 | 0.011407555  |
| sp P04244 ARLY_HUMAN   | 16   | 40 | 76 | 33 | -0.29236 | -0.020819213 | 0.401133875  | 0.271531754  | 0.693695117  | 0.422157963  | 0.015804415 | 5.79E-08    | 0.000215021  |
| sp Q9UQU4 LAMP3_HUMAN  | 21   | 3  | 7  | 4  | -0.41429 | -0.071669337 | 0.688816876  | 0.342621705  | 1.103107918  | 0.760486213  | 0.849827761 | 0.289202172 | 0.40468055   |
| sp Q15404 RSU1_HUMAN   | 13   | 40 | 76 | 33 | 0.054102 | -0.295608353 | -0.129337092 | -0.349710452 | -0.183439191 | 0.166271261  | 0.101455773 | 0.642180073 | 0.629447057  |
| sp Q12864 CAD17_HUMAN  | 1    | 40 | 76 | 33 | 0.175346 | 0.007949473  | 0.054942274  | -0.167396267 | -0.230288014 | -0.062891747 | 0.0632141   | 0.027990518 | 0.704031935  |
| sp P07476 INVO_HUMAN   | 10   | 40 | 76 | 33 | -0.13827 | -0.042886094 | -0.108959783 | 0.095380699  | 0.02930701   | -0.066073689 | 0.560873989 | 0.962822031 | 0.783091241  |
| sp Q14515 SPRL1_HUMAN  | 2    | 40 | 76 | 33 | 0.152845 | 0.058465176  | 0.204251255  | -0.094380012 | 0.051406066  | 0.145786079  | 0.190564319 | 0.068767648 | 0.013015411  |
| sp P01688 UBE2N_HUMAN  | 1    | 40 | 76 | 33 | -0.21621 | -0.104952424 | 0.233114272  | 0.111256158  | 0.449322854  | 0.338066696  | 0.537731063 | 0.001395246 | 0.008086088  |
| sp P34932 HSP74_HUMAN  | 8    | 40 | 76 | 33 | -0.07247 | 0.031725688  | 0.29626471   | 0.104196594  | 0.50209738   | 0.397900785  | 0.342908056 | 2.9E-07     | 4.5E-06      |
| sp P13798 ACPH_HUMAN   | 13   | 40 | 76 | 33 | -0.30688 | -0.120090267 | 0.194618224  | 0.186872763  | 0.501500254  | 0.314627492  | 0.056589861 | 2.31E-06    | 0.001037365  |
| sp Q04721 NOTC2_HUMAN  | 16   | 40 | 76 | 33 | 0.203477 | 0.191898868  | 0.061188209  | -0.011577701 | -0.14228836  | -0.130710659 | 0.895358924 | 3.01E-05    | 1.50E-05     |
| sp Q9BWS9 CHD1_HUMAN   | 18   | 40 | 76 | 33 | 0.013346 | 0.014819768  | 0.088626403  | 0.001474002  | 0.075280728  | 0.073806635  | 0.999818703 | 0.722425474 | 0.672076086  |
| sp Q9HC86 SPON1_HUMAN  | 2    | 40 | 76 | 33 | 0.052612 | 0.012048705  | 0.311158027  | -0.040563643 | 0.258545679  | 0.299109322  | 0.660186967 | 2.64E-05    | 4.2E-08      |
| sp P41226 UBA7_HUMAN   | 327  | 40 | 76 | 33 | 0.158238 | 0.065313936  | 0.80000888   | -0.092924325 | 0.021762627  | 0.114686952  | 0.506926216 | 0.974441249 | 0.403966643  |
| sp Q7L016 BZW1_HUMAN   | 3    | 24 | 49 | 22 | -0.50633 | -0.339841256 | 0.311644147  | 0.166485403  | 0.817970805  | 0.651485402  | 0.813105333 | 0.033437326 | 0.056544734  |
| sp P35241 RADI_HUMAN   | 35   | 40 | 76 | 33 | -0.43462 | -0.430102053 | -0.145295017 | 0.004522710  | 0.289329753  | 0.284807036  | 0.998531107 | 0.018636873 | 0.007619153  |
| sp P31327 CPSM_HUMAN   | 17   | 36 | 69 | 31 | -0.61333 | -0.599322572 | -0.290528676 | 0.014006133  | 0.522800003  | 0.508793896  | 0.994333808 | 0.005180446 | 0.001780978  |
| sp Q15365 PCBP1_HUMAN  | 160  | 40 | 76 | 33 | -0.17608 | -0.074071722 | 0.080286387  | 0.102007618  | 0.456365726  | 0.354358109  | 0.610402308 | 0.06217995  | 0.006775224  |
| sp Q95373 IPO7_HUMAN   | 1396 | 22 | 42 | 17 | -0.09793 | -0.009602119 | 0.320125247  | 0.088328989  | 0.418146355  | 0.329817366  | 0.816841433 | 0.056049132 | 0.101834523  |
| sp P54577 SPY2_HUMAN   | 1    | 40 | 76 | 33 | 0.027577 | 0.00812767   | 0.91208695   | -0.16558978  | 0.063631682  | 0.29221462   | 0.368774392 | 0.902477981 | 0.188895065  |
| sp Q96G03 PGM2_HUMAN   | 2    | 40 | 76 | 33 | -0.17965 | -0.088781556 | 0.147860337  | 0.090865898  | 0.327507991  | 0.236641893  | 0.686203669 | 0.037811015 | 0.110813005  |
| sp P53396 ACLY_HUMAN   | 1    | 40 | 76 | 33 | -0.32305 | -0.088494737 | 0.269100612  | 0.234550605  | 0.592145954  | 0.357595349  | 0.024743601 | 1.5E-07     | 0.00862818   |
| sp P32754 HPPD_HUMAN   | 1    | 40 | 76 | 33 | -0.34233 | -0.075399014 | 0.288466543  | 0.266929545  | 0.630795102  | 0.363865557  | 0.139270789 | 0.000738233 | 0.041728892  |
| sp P42892 ECE1_HUMAN   | 1    | 40 | 76 | 33 | 0.221646 | 0.225251725  | 0.292499476  | 0.00060552   | 0.070853271  | 0.067247751  | 0.995851456 | 0.334570231 | 0.286555041  |
| sp P49189 ALSA1_HUMAN  | 3    | 40 | 76 | 33 | -0.16833 | -0.06107913  | 0.22205474   | 0.170011222  | 0.390383949  | 0.220383827  | 0.050791922 | 4.01E-05    | 0.001707096  |
| sp Q14517 FAT1_HUMAN   | 43   | 40 | 76 | 33 | -0.15107 | -0.167552717 | 0.197348205  | -0.016480322 | 0.348420601  | 0.364900923  | 0.962244831 | 2.28E-05    | 5.38E-07     |
| sp P55786 PSA_HUMAN    | 12   | 40 | 76 | 33 | -0.14233 | -0.067522893 | 0.226838498  | 0.074806346  | 0.369167828  | 0.294361391  | 0.627505001 | 0.000661838 | 0.002483991  |
| sp P08581 MET_HUMAN    | 5    | 40 | 76 | 33 | 0.049651 | 0.085345856  | 0.035295617  | 0.036594981  | -0.014355259 | -0.050050239 | 0.605971722 | 0.945381699 | 0.422581146  |
| sp P32004 L1CAM_HUMAN  | 1    | 40 | 76 | 33 | 0.185866 | 0.089838635  | -0.127188316 | -0.096027419 | -0.313054371 | -0.217026952 | 0.069245071 | 3.59E-08    | 1.59E-05     |
| sp P05388 RLAO_HUMAN   | 27   | 26 | 48 | 20 | -0.13905 | -0.03123449  | 0.357237361  | 0.107813005  | 0.496284856  | 0.388471851  | 0.559278961 | 0.000562317 | 0.002862651  |
| sp P09211 GSTP1_HUMAN  | 4    | 40 | 76 | 33 | -0.05107 | -0.064108521 | 0.156521707  | -0.013042777 | 0.207587452  | 0.206303229  | 0.988727807 | 0.143505167 | 0.0628571    |
| sp Q99435 NEL2_HUMAN   | 12   | 40 | 76 | 33 | 0.062831 | -0.000506861 | -0.054734127 | -0.063338163 | -0.117565429 | -0.054227266 | 0.613960468 | 0.316153133 | 0.730134927  |
| sp P09603 CSF1_HUMAN   | 1    | 40 | 76 | 33 | -0.301   | -0.14418008  | 0.234903946  | 0.156880571  | 0.535902526  | 0.379021954  | 0.107855885 | 1.37E-07    | 2.66E-05     |
| sp Q00610 CLH1_HUMAN   | 1    | 40 | 76 | 33 | -0.29533 | -0.121656385 | 0.219687056  | 0.082668936  | 0.515012377  | 0.432343442  | 0.772169735 | 0.001504365 | 0.002839457  |
| sp Q9BUJ0 ABHEA_HUMAN  | 1    | 7  | 14 | 7  | -0.01682 | -0.067542797 | -0.071485491 | -0.050719623 | 0.002037683  | 0.052757008  | 0.943963602 | 0.939528084 | 0.939528084  |
| sp Q9UQU6 TRHD_HUMAN   | 11   | 40 | 76 | 33 | 0.144368 | 0.207204101  | 0.037725701  | 0.06283584   | -0.10664256  | -0.1694784   | 0.716497675 | 0.5167209   | 0.123648227  |
| sp Q8N392 RHG18_HUMAN  | 2    | 40 | 76 | 33 | 0.003341 | -0.0781812   | 0.099175919  | -0.081521798 | 0.098583521  | 0.177357119  | 0.813006094 | 0.820841367 | 0.425375952  |
| sp Q9N2T1 CALL5_HUMAN  | 3    | 32 | 61 | 25 | -1.81332 | -1.842715555 | -2.37624479  | -0.029393843 | -0.562302766 | -0.532908923 | 0.995696997 | 0.352871973 | 0.02764809   |
| sp P10768 ESTD_HUMAN   | 2    | 40 | 76 | 33 | -0.03104 | 0.094380244  | 0.396245757  | 0.125427264  | 0.427288277  | 0.301865513  | 0.237626504 | 2.66E-05    | 0.000988723  |
| sp P11279 LAMP1_HUMAN  | 19   | 40 | 76 | 33 | 0.480463 | 0.47415684   | 0.304790057  | -0.006305726 | -0.175627506 | -0.169366784 | 0.978229724 | 2.44E-05    | 4.2E-06      |
| sp Q9UNZ2 NSF1C_HUMAN  | 5    | 40 | 76 | 33 | -0.05891 | -0.026784738 | 0.463720563  | 0.032125813  | 0.522631114  | 0.490505301  | 0.9372765   | 2.34E-05    | 7.32E-06     |
| sp P31939 PURA_HUMAN   | 11   | 40 | 76 | 33 | -0.15128 | -0.118870347 | 0.196780142  | 0.032404702  | 0.348055191  | 0.315650489  | 0.931069544 | 0.004859544 | 0.003618706  |
| sp P48147 PPCE_HUMAN   | 13   | 40 | 76 | 33 | -0.18641 | -0.129781778 | 0.199841396  | 0.056632541  | 0.386228715  | 0.329596174  | 0.741128335 | 0.000145866 | 0.000266275  |
| sp Q75116 ROCK2_HUMAN  | 17   | 37 | 69 | 29 | -0.41723 | -0.156790382 | 0.26776786   | 0.260442757  | 0.480009925  | 0.219567168  | 0.276432823 | 0.052423187 | 0.45827878   |
| sp Q96E61 ARSG_HUMAN   | 73   | 29 | 55 | 24 | 0.356434 | 0.241949898  | 0.308564388  | -0.11268435  | -0.04606986  | 0.066614489  | 0.37519307  | 0.891687233 | 0.737717964  |
| sp P0DMV8 HSTJ1A_HUMAN | 8    | 40 | 76 | 33 | -0.16789 |              |              |              |              |              |             |             |              |

|                        |     |    |    |    |          |               |              |              |              |              |              |             |             |
|------------------------|-----|----|----|----|----------|---------------|--------------|--------------|--------------|--------------|--------------|-------------|-------------|
| sp P35609 ACTN2_HUMAN  | 44  | 40 | 76 | 33 | -0.09847 | -0.426420381  | -0.159514432 | -0.32795233  | -0.061046381 | 0.266905949  | 0.152812557  | 0.955243152 | 0.332413192 |
| sp P06756 ITAV_HUMAN   | 19  | 40 | 76 | 33 | 0.19413  | -0.020816767  | -0.087079336 | -0.214947158 | -0.281209726 | -0.066262568 | 7.55E-05     | 1.59E-05    | 0.422295817 |
| sp Q10469 MGAT2_HUMAN  | 162 | 40 | 76 | 33 | 0.085913 | -0.107556461  | -0.05290921  | 0.021643923  | -0.033003328 | -0.054647251 | 0.73613862   | 0.6123297   | 0.184577795 |
| sp Q8WVY7 WFD12_HUMAN  | 266 | 10 | 21 | 10 | 0.289357 | -0.052992503  | -0.095465769 | -0.34234992  | -0.384823186 | -0.042473267 | 0.254119728  | 0.277746586 | 0.978275374 |
| sp Q9UJ70 NAGK_HUMAN   | 3   | 14 | 28 | 12 | 0.000514 | -0.023857021  | -0.003010835 | 0.023343639  | 0.002496764  | -0.020846186 | 0.969019129  | 0.999750588 | 0.007759761 |
| sp B9A064 IGLL5_HUMAN  | 5   | 40 | 76 | 33 | -0.42722 | -0.257397779  | 0.178249943  | 0.169824472  | 0.605472193  | 0.435647722  | 0.266256099  | 2.48E-05    | 0.000739441 |
| sp Q75340 PDC6_HUMAN   | 8   | 40 | 76 | 33 | -0.02012 | 0.006282005   | 0.057175612  | 0.026398544  | 0.077292151  | 0.050893607  | 0.774753536  | 0.22538808  | 0.430702751 |
| sp Q95965 ITGBL_HUMAN  | 11  | 33 | 62 | 27 | -0.0327  | -0.081225937  | 0.210973     | -0.048526448 | 0.243672489  | 0.292198937  | 0.873887115  | 0.10193165  | 0.107028137 |
| sp Q96G07 MEG10_HUMAN  | 1   | 40 | 76 | 33 | 0.124991 | 0.049293815   | -0.123138812 | -0.075697079 | -0.248129705 | -0.172432627 | 0.30892606   | 0.000295015 | 0.005857603 |
| sp Q15149 PLEC_HUMAN   | 2   | 40 | 76 | 33 | -0.68312 | -0.61066582   | 0.076894138  | 0.072453639  | 0.760013596  | 0.687559958  | 0.870706646  | 6.95E-05    | 0.000755961 |
| sp Q9NP64 PCD12_HUMAN  | 57  | 40 | 76 | 33 | 0.06355  | 0.062622721   | 0.072046344  | -0.000927532 | 0.008496091  | 0.009423623  | 0.999711814  | 0.983455355 | 0.974223718 |
| sp P16930 FAAA_HUMAN   | 57  | 40 | 76 | 33 | -0.11809 | 0.025671093   | 0.254566351  | 0.143762413  | 0.372657671  | 0.228895258  | 0.176374602  | 0.000504916 | 0.027280879 |
| sp P50990 TCPQ_HUMAN   | 3   | 40 | 76 | 33 | -0.28918 | -0.169614614  | 0.262959798  | 0.119563005  | 0.552137417  | 0.432574412  | 0.497213573  | 8.00E-05    | 0.000552122 |
| sp P08572 COA2A_HUMAN  | 16  | 40 | 76 | 33 | -0.11298 | -0.161217719  | 0.296989766  | 0.051765268  | 0.409972753  | 0.358207485  | 0.754837785  | 1.73E-05    | 2.30E-05    |
| sp Q15230 LAMA5_HUMAN  | 1   | 40 | 76 | 33 | -0.03641 | -0.106388281  | 0.177101654  | -0.069983057 | 0.213506878  | 0.283489935  | 0.417450861  | 0.004701566 | 1.15E-05    |
| sp P0DDMN0 ST1A4_HUMAN | 8   | 40 | 76 | 33 | -0.39284 | -0.315369312  | -0.034962438 | 0.077466446  | 0.35787332   | 0.280406874  | 0.860615395  | 0.100863534 | 0.182913392 |
| sp Q00461 GOL4_HUMAN   | 12  | 40 | 76 | 33 | -0.33831 | -0.289730713  | 0.075703403  | 0.048574445  | 0.414008565  | 0.365434116  | 0.776474714  | 1.16E-05    | 1.27E-05    |
| sp P61201 CSN2_HUMAN   | 7   | 37 | 69 | 30 | -0.45366 | -0.102715083  | 0.140929045  | 0.246530773  | 0.594584901  | 0.348054128  | 0.037174834  | 5.82E-06    | 0.003844503 |
| sp Q93091 RNA56_HUMAN  | 34  | 40 | 76 | 33 | -0.17069 | -0.168186136  | 0.335030028  | 0.002507759  | 0.505723924  | 0.503216165  | 0.99960778   | 4.65E-05    | 0.451E-06   |
| sp Q95861 BPN1_HUMAN   | 1   | 40 | 76 | 33 | -0.18316 | -0.082619777  | 0.317884241  | 0.100537851  | 0.50104187   | 0.400504019  | 0.405155559  | 1.12E-06    | 1.15E-05    |
| sp Q9H151 SNAB_HUMAN   | 1   | 11 | 21 | 9  | 0.048851 | -0.268757088  | 0.524567015  | -0.317608521 | 0.475715587  | 0.793324103  | 0.168315121  | 0.066336341 | 0.000287042 |
| sp Q93063 EXT2_HUMAN   | 1   | 40 | 76 | 33 | 0.121302 | 0.062253339   | 0.104936451  | -0.059048386 | -0.016365274 | 0.042683113  | 0.08516321   | 0.874782784 | 0.318029246 |
| sp P55072 TERA_HUMAN   | 3   | 40 | 76 | 33 | -0.1952  | -0.157750125  | 0.155914264  | 0.03745201   | 0.351116399  | 0.31366439   | 0.952753132  | 0.05402919  | 0.005420919 |
| sp P08473 NEP_HUMAN    | 11  | 40 | 76 | 33 | 0.14022  | 0.220770701   | 0.099011956  | 0.080550636  | -0.041208109 | -0.121758745 | 0.583446678  | 0.906871297 | 0.341379907 |
| sp P50502 F10A1_HUMAN  | 19  | 40 | 76 | 33 | -0.25296 | -0.148154623  | 0.222838226  | 0.104808832  | 0.475801681  | 0.370992849  | 0.479902629  | 6.97E-05    | 0.000528908 |
| sp Q9UMH8 HAOX1_HUMAN  | 28  | 8  | 14 | 6  | -0.20215 | -0.32957047   | 0.25876492   | -0.127388659 | 0.461024881  | 0.588413539  | 0.854901461  | 0.268770359 | 0.083001561 |
| sp Q9H444 AMPB_HUMAN   | 4   | 40 | 76 | 33 | -0.17052 | 0.032206884   | 0.08375042   | 0.202727478  | 0.257895637  | 0.055168158  | 0.002081016  | 0.000105902 | 0.033380372 |
| sp Q00339 MATN2_HUMAN  | 4   | 40 | 76 | 33 | 0.10791  | 0.059344755   | 0.090630265  | -0.048564856 | -0.008279347 | 0.040285509  | 0.459919945  | 0.98420331  | 0.624523279 |
| sp Q8TDQ7 GNPI2_HUMAN  | 19  | 40 | 76 | 33 | 0.018426 | 0.015852571   | 0.10282106   | -0.002573857 | 0.082399721  | 0.084973579  | 0.998329636  | 0.311011146 | 0.207493931 |
| sp P16949 STMN1_HUMAN  | 1   | 33 | 62 | 26 | -0.35333 | -0.251464989  | 0.370839517  | 0.101868805  | 0.724173311  | 0.622304506  | 0.64227784   | 2.04E-06    | 4.59E-06    |
| sp P29144 TPP2_HUMAN   | 54  | 36 | 69 | 31 | 0.591173 | 0.5443834     | 0.800854724  | -0.046788065 | 0.209681259  | 0.256469325  | 0.857255311  | 0.119312746 | 0.018276234 |
| sp P48637 GSHB_HUMAN   | 12  | 40 | 76 | 33 | 0.019691 | 0.087446548   | 0.294691394  | 0.067755901  | 0.275000747  | 0.207244846  | 0.417145812  | 0.000105328 | 0.001149375 |
| sp Q75233 GGCT_HUMAN   | 28  | 40 | 76 | 33 | -0.29014 | -0.091838364  | 0.314999062  | 0.198305157  | 0.605142583  | 0.406837426  | 0.128844466  | 6.30E-06    | 0.000749736 |
| sp P60520 GBRL2_HUMAN  | 2   | 20 | 42 | 19 | -0.17764 | -0.068524771  | 0.238723404  | 0.1079116738 | 0.416364913  | 0.307248176  | 0.7077990872 | 0.032070434 | 0.001797509 |
| sp P07339 CATD_HUMAN   | 27  | 40 | 76 | 33 | -0.00077 | -0.001751449  | 0.523766741  | -0.000908613 | 0.524537576  | 0.255158189  | 0.999921007  | 1.15E-06    | 4.22E-08    |
| sp P07148 FABP_HUMAN   | 35  | 40 | 76 | 33 | -0.32992 | -0.212345684  | 0.282341809  | 0.117571602  | 0.612259095  | 0.494687492  | 0.535616656  | 2.50E-05    | 0.000131319 |
| sp P12926 CD9_HUMAN    | 8   | 40 | 76 | 33 | -0.62429 | -0.028947247  | 0.057669375  | 0.595347096  | 0.681963177  | 0.086616622  | 0.000156721  | 0.000339162 | 0.837500372 |
| sp P23471 PTPRZ_HUMAN  | 12  | 40 | 76 | 33 | 0.161103 | 0.12780302    | 0.042846395  | -0.033299801 | -0.118256425 | -0.084956624 | 0.591249124  | 0.012347133 | 0.053452724 |
| sp Q9Y646 CBPQ_HUMAN   | 33  | 40 | 76 | 33 | 0.09597  | 0.127063991   | -0.034178569 | 0.031093879  | -0.130148681 | -0.16124256  | 0.830383501  | 0.11038565  | 0.014854183 |
| sp Q98Y22 FUCO2_HUMAN  | 450 | 40 | 76 | 33 | 0.200762 | 0.141108777   | 0.307139857  | -0.059653557 | 0.106377523  | 0.166031079  | 0.507056965  | 0.228619576 | 0.011818278 |
| sp A8MU46 SMTL1_HUMAN  | 3   | 4  | 6  | 3  | 0.005489 | 0.202174101   | 1.882342508  | 0.196685121  | 1.876853529  | 1.680168407  | 0.975558479  | 0.248607165 | 0.269138602 |
| sp Q9Y247 NCKP1_HUMAN  | 10  | 11 | 21 | 10 | -0.52624 | -0.207158459  | 0.134178389  | 0.319079113  | 0.66041596   | 0.341336847  | 0.80697223   | 0.352830668 | 0.355251254 |
| sp Q92520 FAM3C_HUMAN  | 4   | 40 | 76 | 33 | 0.012301 | -0.009011359  | 0.22772502   | -0.021312564 | 0.215423814  | 0.236736379  | 0.912006532  | 0.002226412 | 0.000109191 |
| sp Q43242 PSMD3_HUMAN  | 18  | 33 | 62 | 27 | -0.35219 | -0.091813365  | 0.21776263   | 0.260373915  | 0.569949909  | 0.309575995  | 0.091671895  | 0.000580702 | 0.053328618 |
| sp Q98T78 CSNA_HUMAN   | 24  | 11 | 21 | 9  | -0.07531 | 0.055462471   | 0.116949968  | 0.130773508  | 0.192261005  | 0.061487497  | 0.569453485  | 0.433043485 | 0.894611043 |
| sp P07951 TPM2_HUMAN   | 3   | 40 | 76 | 33 | 0.016833 | -0.213330542  | 0.21036964   | -0.230163603 | 0.193536579  | 0.423700182  | 0.246102036  | 0.502009023 | 0.012760162 |
| sp P10253 LYAG_HUMAN   | 86  | 40 | 76 | 33 | 0.020955 | 0.0661961673  | 0.182870371  | 0.041007163  | 0.16191586   | 0.120908697  | 0.68616579   | 0.020117797 | 0.016064087 |
| sp Q13642 FHL1_HUMAN   | 44  | 40 | 76 | 33 | -0.10269 | -0.128245675  | 0.25586639   | -0.025552928 | 0.128279386  | 0.153832314  | 0.9836418    | 0.751282075 | 0.593336705 |
| sp Q9NYU2 UGGG1_HUMAN  | 13  | 40 | 76 | 33 | -0.05899 | -0.015703162  | 0.149449474  | 0.043280609  | 0.208434705  | 0.165152636  | 0.70471156   | 0.004881364 | 0.013633411 |
| sp Q95490 AGRL2_HUMAN  | 12  | 7  | 14 | 6  | 0.071898 | -0.014092531  | 0.022744782  | -0.085990472 | -0.049153159 | 0.036837313  | 0.25991128   | 0.726501411 | 0.791195542 |
| sp Q15102 PA1B3_HUMAN  | 3   | 40 | 76 | 33 | -0.06728 | 0.059956752   | 0.308993472  | 0.127321478  | 0.376268816  | 0.249036668  | 0.244071894  | 0.000344069 | 0.010128812 |
| sp P04179 SODM_HUMAN   | 14  | 40 | 76 | 33 | -0.03583 | 0.007990939   | 0.497276064  | 0.042933179  | 0.285560186  | 0.242627007  | 0.875715026  | 0.020325094 | 0.027602125 |
| sp Q13442 HAP28_HUMAN  | 6   | 26 | 48 | 20 | -0.04503 | -0.105300021  | 0.855101522  | -0.060271856 | 0.900129908  | 0.960401764  | 0.946516624  | 0.00646424  | 4.25E-05    |
| sp P04080 CYTB_HUMAN   | 12  | 40 | 76 | 33 | -0.52071 | -0.323983058  | 0.434465697  | 0.196724453  | 0.955173208  | 0.758448755  | 0.168133372  | 4.56E-11    | 2.65E-09    |
| sp P02647 APOA1_HUMAN  | 48  | 40 | 76 | 33 | -0.29901 | -0.012075004  | 0.356317907  | 0.28693495   | 0.655327786  | 0.368392911  | 0.015033347  | 9.96E-07    | 0.00255451  |
| sp P15907 SIAT1_HUMAN  | 4   | 40 | 76 | 33 | -0.11412 | -0.023935516  | 0.205838075  | 0.090188019  | 0.31996161   | 0.229773591  | 0.210909379  | 5.00E-06    | 0.000248869 |
| sp Q86527 GALT7_HUMAN  | 9   | 40 | 76 | 33 | 0.10894  | 0.145744092   | -0.028825527 | 0.036804531  | -0.137765088 | -0.174569619 | 0.458929726  | 0.000851138 | 1.23E-06    |
| sp P00367 DHE3_HUMAN   | 27  | 40 | 76 | 33 | -0.07067 | -0.07644892   | 0.226572513  | 0.033024555  | 0.29724196   | 0.264217405  | 0.963976082  | 0.134186672 | 0.132760411 |
| sp P07108 ACBP_HUMAN   | 12  | 40 | 76 | 33 | -0.41886 | -0.332222241  | 0.317705236  | 0.086639971  | 0.736567448  | 0.649927477  | 0.747316545  | 2.58E-06    | 2.87E-06    |
| sp Q15151 ARPC5_HUMAN  | 22  | 40 | 76 | 33 | 0.010229 | -0.0611010852 | 0.290381415  | -0.071239864 | 0.280342002  | 0.351392266  | 0.848349039  | 0.177968989 | 0.033480808 |
| sp P52888 THOP1_HUMAN  | 9   | 40 | 76 | 33 | -0.06418 | 0.086949042   | 0.304298709  | 0.151128368  | 0.368478035  | 0.217349667  | 0.064043654  | 2.93E-05    | 0.007677479 |
| sp Q15382 RHEB_HUMAN   | 15  | 14 | 27 | 12 | 0.16666  | -0.048727528  | 0.340337528  | -0.215387399 | 0.173677657  | 0.389065056  | 0.419482451  | 0.670097997 | 0.085631619 |
| sp P46060 RAGP1_HUMAN  | 74  | 4  | 6  | 3  | -0.03804 | 0.319981703   | 0.549037978  | 0.358018963  | 0.587052328  | 0.229056275  | 0.23059761   | 0.105597839 | 0.616913936 |
| sp Q8N859 TXND5_HUMAN  | 11  | 40 | 76 | 33 | -0.41805 | -0.354398195  | 0.49637057   | 0.063653071  | 0.913688324  | 0.850035253  | 0.822251848  | 1.42E-10    | 2.11E-11    |
| sp Q75594 PGRP1_HUMAN  | 3   | 40 | 76 | 33 | -0.02609 | 0.040662056   | 0.252454534  | 0.066749813  | 0.278542291  | 0.211792478  | 0.646431894  | 0.006722481 | 0.024062919 |
| sp Q9NMQW XRP1_HUMAN   | 46  | 40 | 76 |    |          |               |              |              |              |              |              |             |             |

|                        |     |    |    |    |          |              |              |              |              |              |             |             |             |
|------------------------|-----|----|----|----|----------|--------------|--------------|--------------|--------------|--------------|-------------|-------------|-------------|
| sp P40227 TCPZ_HUMAN   | 5   | 34 | 62 | 26 | -0.16859 | 0.038327204  | 0.483995585  | 0.206918081  | 0.652586463  | 0.445668381  | 0.428658538 | 0.00469298  | 0.041256659 |
| sp O00029 DNM1L_HUMAN  | 7   | 40 | 76 | 33 | -0.12049 | -0.172865603 | 0.080584933  | -0.052374711 | 0.201075825  | 0.253450535  | 0.90548915  | 0.367840205 | 0.135221217 |
| sp O00046 AGRIN_HUMAN  | 28  | 40 | 76 | 33 | -0.2517  | -0.122944999 | 0.3056017    | 0.12875111   | 0.557302314  | 0.428551199  | 0.116288829 | 9.62E-11    | 1.40E-08    |
| sp Q81299 AGRG2_HUMAN  | 3   | 40 | 76 | 33 | 0.1653   | 0.101094477  | -0.12465334  | -0.064205181 | -0.289953001 | -0.225747817 | 0.311410855 | 5.17E-07    | 1.05E-05    |
| sp P54764 EPHA4_HUMAN  | 3   | 40 | 76 | 33 | 0.046674 | -0.032886864 | -0.179679924 | -0.079542691 | -0.226359391 | -0.146811241 | 0.393792713 | 0.006767675 | 0.064862415 |
| sp P98095 FBLN2_HUMAN  | 7   | 40 | 76 | 33 | 0.089558 | 0.056672562  | 0.396269519  | -0.032885797 | 0.306711159  | 0.339596957  | 0.829911274 | 3.93E-05    | 2.65E-07    |
| sp P30626 SORCN_HUMAN  | 9   | 36 | 69 | 30 | -0.11856 | -0.011692335 | 0.121110607  | 0.106864436  | 0.239667377  | 0.132802942  | 0.28018823  | 0.103804766 | 0.176774466 |
| sp Q13310 PABP4_HUMAN  | 18  | 23 | 41 | 18 | -0.07995 | -0.027345643 | 0.19214499   | 0.052605192  | 0.272095824  | 0.219490632  | 0.898968587 | 0.150127127 | 0.214920063 |
| sp P15259 PGAM2_HUMAN  | 2   | 40 | 76 | 33 | -0.06827 | 0.020353066  | 0.200435766  | 0.088623901  | 0.276706601  | 0.1880827    | 0.417881773 | 0.003719202 | 0.034644959 |
| sp Q75326 SEM7A_HUMAN  | 4   | 40 | 76 | 33 | -0.0006  | 0.024316684  | 0.198044393  | 0.024912942  | 0.190640651  | 0.165727709  | 0.812470572 | 0.000419075 | 0.000553797 |
| sp P42785 PCP_HUMAN    | 6   | 40 | 76 | 33 | 0.012607 | 0.050361138  | 0.219722885  | 0.037753649  | 0.207115397  | 0.169361748  | 0.651980358 | 0.000269647 | 0.000851289 |
| sp P11597 CETP_HUMAN   | 3   | 40 | 76 | 33 | 0.291564 | 0.260833186  | -0.242505259 | -0.030730921 | -0.534069366 | -0.503338445 | 0.943022442 | 1.69E-05    | 4.67E-06    |
| sp Q68818 OLM2B_HUMAN  | 50  | 3  | 6  | 3  | -0.38182 | -0.544501866 | 0.691297093  | -0.162678344 | 1.073120614  | 1.235798958  | 0.935942624 | 0.170989376 | 0.063116169 |
| sp Q86U17 SPA11_HUMAN  | 4   | 40 | 76 | 33 | 0.094263 | 0.096942429  | 0.315637702  | 0.002679897  | 0.22137517   | 0.218695273  | 0.998813427 | 0.005019306 | 0.001505408 |
| sp Q43390 HNRPR_HUMAN  | 1   | 29 | 55 | 24 | 0.100251 | 0.032631812  | 0.340007837  | -0.067619487 | 0.239756538  | 0.307376025  | 0.827774005 | 0.19935564  | 0.036911909 |
| sp Q9HK51 MER34_HUMAN  | 11  | 40 | 76 | 33 | -0.07202 | -0.093766047 | -0.07294994  | -0.021744963 | -0.000930856 | 0.020816107  | 0.970173113 | 0.995961708 | 0.975934476 |
| sp Q94923 GLCE_HUMAN   | 1   | 40 | 76 | 33 | -0.12255 | -0.007140733 | 0.036334079  | 0.11541122   | 0.158886033  | 0.043474812  | 0.206919327 | 0.128729507 | 0.81942481  |
| sp Q15369 ELOC_HUMAN   | 1   | 13 | 28 | 12 | -0.18299 | -0.069459759 | 0.496090685  | 0.113528224  | 0.679078668  | 0.565550444  | 0.784114514 | 0.004452609 | 0.006138884 |
| sp P48059 LIMS1_HUMAN  | 20  | 40 | 76 | 33 | -0.01136 | -0.148553371 | 0.013734528  | -0.137193103 | 0.025094797  | 0.1622879    | 0.685756216 | 0.991295105 | 0.029376073 |
| sp Q16851 UGPA_HUMAN   | 4   | 40 | 76 | 33 | 0.07271  | 0.212146026  | 0.66167452   | 0.139436519  | 0.588965012  | 0.449528494  | 0.416168118 | 5.12E-05    | 0.000559526 |
| sp P49006 MRP_HUMAN    | 2   | 10 | 21 | 10 | -0.66255 | -0.250249276 | 0.600870351  | 0.412305393  | 1.26342502   | 0.851119627  | 0.355806408 | 0.002149191 | 0.017873163 |
| sp P00491 PNPH_HUMAN   | 25  | 40 | 76 | 33 | -0.12577 | -0.099404057 | 0.193760586  | 0.026363285  | 0.319527928  | 0.293164643  | 0.963595598 | 0.026754363 | 0.020877645 |
| sp P40121 CAPG_HUMAN   | 7   | 40 | 76 | 33 | -0.19873 | -0.034773115 | 0.308611118  | 0.163960627  | 0.50734486   | 0.343384233  | 0.099291511 | 1.11E-06    | 0.000292951 |
| sp P21695 GPD4_HUMAN   | 3   | 40 | 76 | 33 | 0.093292 | 0.114783763  | 0.135897289  | 0.021491813  | 0.042605339  | 0.021113526  | 0.943617004 | 0.854535398 | 0.95200944  |
| sp Q9Y4C0 NRX3A_HUMAN  | 3   | 40 | 76 | 33 | 0.19888  | 0.064092504  | -0.108771128 | -0.134787977 | -0.307651691 | -0.172863633 | 0.008448575 | 1.76E-07    | 0.001157005 |
| sp Q6V017 FATA4_HUMAN  | 17  | 40 | 76 | 33 | 0.011107 | -0.005523844 | 0.02986644   | -0.016630996 | 0.018759288  | 0.35390285   | 0.837540587 | 0.855431388 | 0.496130247 |
| sp P05186 PPB2_HUMAN   | 2   | 40 | 76 | 33 | 0.009176 | 0.054222123  | 0.299258201  | 0.045046371  | 0.290082448  | 0.245036077  | 0.739982102 | 0.000342512 | 0.000681072 |
| sp P25445 TNR6_HUMAN   | 3   | 40 | 76 | 33 | 0.024861 | 0.036219295  | 0.048606959  | 0.011358459  | 0.382001213  | 0.370641664  | 0.980350717 | 1.25E-06    | 1.18E-07    |
| sp P58166 INHBE_HUMAN  | 29  | 40 | 76 | 33 | -0.12728 | -0.054671731 | 0.086906784  | 0.072638001  | 0.214182316  | 0.141578514  | 0.563171133 | 0.035094251 | 0.150987193 |
| sp P29323 EPHB2_HUMAN  | 1   | 40 | 76 | 33 | -0.15002 | -0.084396267 | -0.043966038 | 0.065626974  | 0.106057202  | 0.040430228  | 0.264397888 | 0.09335431  | 0.639259864 |
| sp Q02818 NUCB1_HUMAN  | 9   | 40 | 76 | 33 | -0.17067 | -0.066582577 | 0.90714227   | 0.104082612  | 0.661379416  | 0.557296804  | 0.546181296 | 3.98E-07    | 1.42E-06    |
| sp Q8WV61 FCAMR_HUMAN  | 24  | 36 | 69 | 30 | -0.30305 | -0.1658975   | 0.185717709  | 0.137154115  | 0.488769323  | 0.351615208  | 0.322803888 | 0.000108675 | 0.001996284 |
| sp P40189 IL6RB_HUMAN  | 77  | 40 | 76 | 33 | 0.415713 | 0.413234574  | 0.450129958  | -0.002478001 | 0.034417383  | 0.036895384  | 0.996082923 | 0.594801979 | 0.468702674 |
| sp Q9UB06 EXTL2_HUMAN  | 3   | 40 | 76 | 33 | 0.219135 | 0.116564195  | -0.111923188 | -0.102579057 | -0.33105834  | -0.228487383 | 0.063446194 | 2.95E-08    |             |
| sp P15311 EZR1_HUMAN   | 8   | 40 | 76 | 33 | 0.038952 | 0.071725209  | 0.270827295  | 0.032773632  | 0.231875719  | 0.199102086  | 0.871871281 | 0.010826891 | 0.014159942 |
| sp Q9Y5Z4 HEBP2_HUMAN  | 2   | 36 | 69 | 30 | -0.3635  | -0.343289674 | 0.185972901  | 0.02021245   | 0.549475024  | 0.529262575  | 0.985601143 | 0.001026424 | 0.000315628 |
| sp Q7Z7M9 GALT5_HUMAN  | 23  | 40 | 76 | 33 | 0.156736 | 0.064384129  | 0.038335125  | -0.092351483 | -0.118399887 | -0.026048404 | 0.26431977  | 0.220898851 | 0.909910339 |
| sp P12844 PECA1_HUMAN  | 2   | 40 | 76 | 33 | 0.064787 | 0.028594324  | 0.09911359   | -0.036192888 | 0.034326379  | 0.070519267  | 0.611502856 | 0.736487762 | 0.910795242 |
| sp Q06323 PSME1_HUMAN  | 4   | 40 | 76 | 33 | -0.24354 | -0.026562528 | 0.397595588  | 0.216884453  | 0.6415003    | 0.424615847  | 0.05889289  | 2.42E-07    | 0.00012607  |
| sp P00966 ASSY_HUMAN   | 143 | 32 | 62 | 28 | 0.167094 | 0.395494665  | 0.519292962  | 0.228400698  | 0.352198995  | 0.123798296  | 0.575797009 | 0.052739063 | 0.616545416 |
| sp P62191 PR54_HUMAN   | 52  | 7  | 14 | 5  | 0.161759 | 0.164071119  | 0.537069751  | 0.002312027  | 0.375310659  | 0.372998633  | 0.99895174  | 0.110986077 | 0.06583267  |
| sp P07384 CAN1_HUMAN   | 1   | 40 | 76 | 33 | -0.04758 | -0.031381414 | 0.335256963  | 0.016198772  | 0.382837149  | 0.366638376  | 0.980282858 | 0.900791066 | 0.00261509  |
| sp Q11201 SIA4A_HUMAN  | 1   | 40 | 76 | 33 | 0.003834 | -0.031587704 | -0.022430451 | -0.035421322 | -0.026264069 | 0.009157254  | 0.59100741  | 0.818566719 | 0.96945156  |
| sp P49593 PPM1F_HUMAN  | 1   | 36 | 69 | 31 | 0.02806  | -0.007809086 | 0.126108097  | -0.035869555 | 0.098047629  | 0.133917184  | 0.83149903  | 0.382034517 | 0.103120414 |
| sp P47914 RL29_HUMAN   | 5   | 4  | 7  | 2  | -0.43034 | -0.109143119 | -0.251347951 | 0.321192958  | 0.178988126  | -0.142204832 | 0.479994285 | 0.880048467 | 0.910222532 |
| sp Q9HC84 MUC5B_HUMAN  | 3   | 40 | 76 | 33 | -0.15563 | -0.420972686 | -0.099118579 | -0.265344917 | 0.056509189  | 0.321854106  | 0.195232079 | 0.949345135 | 0.122461152 |
| sp P30049 ATP_D_HUMAN  | 4   | 4  | 6  | 3  | 0.075098 | -0.175264566 | 0.70643548   | -0.250362276 | 0.63133777   | 0.881700046  | 0.861900254 | 0.25883393  | 0.258836782 |
| sp Q3KQJ3 MA7D1_HUMAN  | 10  | 4  | 6  | 3  | -0.17913 | 0.043296157  | 1.245130275  | 0.224242095  | 1.424256213  | 1.201834118  | 0.949457095 | 0.265351138 | 0.324280735 |
| sp Q9Y2O5 LTOR2_HUMAN  | 43  | 7  | 14 | 6  | 0.036403 | 0.251615787  | 0.56050311   | 0.215212898  | 0.524100221  | 0.308887323  | 0.308666313 | 0.123735689 | 0.000293932 |
| sp Q99426 TBCB_HUMAN   | 41  | 40 | 76 | 33 | -0.28789 | -0.25049674  | 0.256058937  | 0.032841904  | 0.543950515  | 0.511108611  | 0.971331616 | 0.050407908 | 0.002939302 |
| sp P98161 PKD1_HUMAN   | 8   | 40 | 76 | 33 | 0.007513 | -0.007896818 | -0.03889864  | -0.015409359 | -0.046411181 | -0.031001822 | 0.895061523 | 0.051761289 | 0.617661617 |
| sp Q12797 ASPH_HUMAN   | 8   | 40 | 76 | 33 | 0.064008 | 0.044529312  | 0.115735359  | -0.019550377 | 0.05165567   | 0.071206047  | 0.839870347 | 0.434010659 | 0.136189921 |
| sp P55084 ECHB_HUMAN   | 9   | 4  | 7  | 3  | 0.190986 | 0.083987679  | 1.136782537  | -0.1069984   | 0.945196458  | 1.052194858  | 0.86873544  | 0.218992713 | 0.112787241 |
| sp P08582 TRFM_HUMAN   | 74  | 40 | 76 | 33 | 0.186066 | 0.12559503   | 0.485195628  | -0.060470881 | -0.268022838 | -0.207551958 | 0.620546264 | 0.002223942 | 0.008874367 |
| sp P32019 SP2_HUMAN    | 9   | 4  | 7  | 3  | 0.054315 | 0.115351947  | 0.099376334  | 0.061037435  | 0.441061821  | 0.380024386  | 0.826391629 | 0.01262772  | 0.016226255 |
| sp Q9NWW4 CIB1_HUMAN   | 5   | 40 | 76 | 33 | -0.35864 | -0.243416817 | 0.055844732  | 0.115222619  | 0.414484168  | 0.299261549  | 0.544528138 | 0.005631433 | 0.03038409  |
| sp Q8WV11 LMO7_HUMAN   | 3   | 4  | 6  | 3  | -0.03253 | -0.00327693  | 0.789274667  | 0.029257982  | 0.82180958   | 0.792551598  | 0.99809741  | 0.379490539 | 0.352376624 |
| sp P21709 EPHA1_HUMAN  | 10  | 40 | 76 | 33 | -0.03018 | -0.009996048 | 0.279514879  | 0.2021817    | 0.309698097  | 0.289510926  | 0.879516409 | 2.08E-08    | 3.78E-09    |
| sp P62491 RB1A_HUMAN   | 497 | 40 | 76 | 33 | -0.43209 | -0.326782109 | 0.243005644  | 0.105307401  | 0.675095154  | 0.569787753  | 0.715076067 | 0.000162335 | 0.000347145 |
| sp P15289 ARSA_HUMAN   | 589 | 40 | 76 | 33 | 0.097949 | 0.098612848  | 0.242961098  | 0.00603628   | 0.145011879  | 0.144348251  | 0.999950026 | 0.128024785 | 0.113089021 |
| sp P54578 UBP1A_HUMAN  | 6   | 40 | 76 | 33 | -0.12678 | -0.051051526 | 0.276607529  | 0.075273665  | 0.403382719  | 0.327659055  | 0.580340329 | 5.92E-05    | 0.00052865  |
| sp Q92734 TFG_HUMAN    | 5   | 4  | 7  | 3  | -0.08724 | 0.055128555  | 0.37784859   | 0.142369645  | 0.72502595   | 0.582656304  | 0.892854654 | 0.183193592 | 0.250411994 |
| sp Q9H351 SEMA4A_HUMAN | 41  | 40 | 76 | 33 | -0.07658 | -0.1603116   | 0.063473901  | 0.060548606  | 0.140053668  | 0.079505061  | 0.553031013 | 0.116342098 | 0.490900205 |
| sp Q6Q788 APOA5_HUMAN  | 18  | 40 | 76 | 33 | -0.00753 | -0.026630387 | 0.017907176  | -0.019104469 | 0.025433094  | 0.044537563  | 0.962416696 | 0.954206666 | 0.833177196 |
| sp P02545 LMNA_HUMAN   | 42  | 40 | 76 | 33 | -0.35142 | -0.264957001 | 0.403737699  | 0.08646102   | 0.75515572   | 0.6686947    | 0.646890226 | 4.33E-09    | 4.49E-09    |
| sp Q75339 CILP1_HUMAN  | 5   | 40 | 76 | 33 | 0.030247 | 0.0310048    |              |              |              |              |             |             |             |

|                        |     |    |    |    |          |              |              |              |              |              |             |             |             |
|------------------------|-----|----|----|----|----------|--------------|--------------|--------------|--------------|--------------|-------------|-------------|-------------|
| sp P05771 KPCB_HUMAN   | 9   | 40 | 76 | 33 | -0.33718 | -0.186352856 | -0.025191144 | 0.150827121  | 0.311988833  | 0.161161712  | 0.543918821 | 0.169339282 | 0.543122572 |
| sp Q13561 DCTN2_HUMAN  | 1   | 33 | 63 | 27 | -0.22981 | -0.134230394 | 0.305260801  | 0.095578523  | 0.539077467  | 0.443498944  | 0.69807514  | 0.000716321 | 0.001830984 |
| sp Q09276 RTNR4_HUMAN  | 12  | 36 | 68 | 30 | 0.085379 | 0.074622717  | 0.254402853  | -0.010758289 | 0.169023738  | 0.179775637  | 0.989031034 | 0.56657818  | 0.070862743 |
| sp P07585 PGS2_HUMAN   | 2   | 40 | 76 | 33 | -0.03701 | -0.006059973 | 0.219752173  | 0.030911684  | 0.256765831  | 0.252848147  | 0.910611037 | 0.01401282  | 0.014932328 |
| sp P62993 GRB2_HUMAN   | 159 | 40 | 76 | 33 | -0.17686 | -0.28044764  | 0.192277725  | -0.103612139 | 0.369140225  | 0.472752364  | 0.675709746 | 0.035804772 | 0.001205116 |
| sp Q9NQ38 ISK5_HUMAN   | 7   | 40 | 76 | 33 | 0.114116 | 0.018100474  | 0.186350223  | -0.09601547  | 0.072234279  | 0.168249748  | 0.230267932 | 0.560520885 | 0.021005146 |
| sp Q5V5W3 BROX_HUMAN   | 6   | 18 | 35 | 16 | -0.01424 | -0.12915479  | 0.205633296  | -0.114916978 | 0.219871109  | 0.334788087  | 0.646764939 | 0.325600056 | 0.03911416  |
| sp Q09291 NEBU_HUMAN   | 5   | 11 | 20 | 8  | 0.032741 | -0.152616468 | 0.339768481  | -0.18535774  | 0.307027209  | 0.492384949  | 0.68514487  | 0.511295314 | 0.130248855 |
| sp Q06830 PRDX1_HUMAN  | 15  | 40 | 76 | 33 | -0.0059  | 0.221103686  | 0.51550997   | 0.227005693  | 0.521411977  | 0.294406284  | 0.01941964  | 1.91E-06    | 0.003281959 |
| sp Q9H251 CAD23_HUMAN  | 2   | 40 | 76 | 33 | 0.084604 | 0.104236019  | -0.190857433 | 0.019632173  | -0.275461278 | -0.295093452 | 0.893394754 | 1.41E-06    |             |
| sp P01036 CYTS_HUMAN   | 27  | 33 | 61 | 27 | -0.05515 | -0.250166058 | 0.019867454  | -0.195012163 | 0.075021349  | 0.270033511  | 0.503645841 | 0.931532786 | 0.31887211  |
| sp Q10472 GALT1_HUMAN  | 32  | 40 | 76 | 33 | 0.081366 | 0.10447713   | 0.142015582  | 0.023110967  | 0.060649418  | 0.037538452  | 0.731879127 | 0.231026151 | 0.486805826 |
| sp P00568 KAD1_HUMAN   | 1   | 40 | 76 | 33 | -0.24962 | -0.041415425 | 0.27244545   | 0.208204505  | 0.526864475  | 0.318659969  | 0.104381663 | 8.95E-05    | 0.010565548 |
| sp Q00592 PODXL_HUMAN  | 17  | 40 | 76 | 33 | 0.158028 | 0.149865826  | 0.051220736  | -0.008162334 | -0.106807424 | -0.09864509  | 0.975700605 | 0.059470302 | 0.047072892 |
| sp P01880 GHD_HUMAN    | 8   | 40 | 76 | 33 | -0.33563 | -0.144439631 | -0.320638842 | 0.19118721   | 0.014987998  | -0.176199211 | 0.350293375 | 0.995512282 | 0.456375359 |
| sp Q6UXK73 CP089_HUMAN | 5   | 29 | 55 | 25 | 0.040021 | 0.092594386  | 0.138977814  | 0.052572959  | 0.098956387  | 0.046383428  | 0.707594552 | 0.422910343 | 0.783461001 |
| sp P51149 RAB7A_HUMAN  | 6   | 40 | 76 | 33 | -0.19631 | -0.23634675  | 0.045128726  | -0.040034575 | 0.241440902  | 0.281475477  | 0.93888984  | 0.210648764 | 0.069734014 |
| sp P42229 STA5A_HUMAN  | 22  | 21 | 42 | 17 | -0.12341 | -0.137611224 | 0.38679079   | -0.014197596 | 0.510204416  | 0.524402015  | 0.994199529 | 0.009390031 | 0.002031621 |
| sp Q99832 TCPH_HUMAN   | 6   | 29 | 56 | 24 | 0.239755 | 0.217889496  | 0.545260015  | -0.021865384 | 0.305505135  | 0.327370519  | 0.972417266 | 0.020779812 | 0.005736574 |
| sp P69891 HBBG1_HUMAN  | 4   | 40 | 76 | 33 | -1.34798 | -1.29786924  | -0.295525757 | 0.050107232  | 1.088423715  | 1.038316483  | 0.970149181 | 0.001020656 | 3.28E-05    |
| sp P04062 GLCM_HUMAN   | 189 | 40 | 76 | 33 | 0.132762 | 0.158286774  | 0.23984081   | 0.02552443   | 0.107078465  | 0.081554035  | 0.704881647 | 0.016611001 | 0.047469402 |
| sp A6N173 LIRAS_HUMAN  | 72  | 29 | 55 | 24 | -0.43988 | -0.307286352 | 0.171978985  | 0.132595998  | 0.611861335  | 0.479265337  | 0.472126088 | 5.21E-05    | 0.000377084 |
| sp Q00154 BACH3_HUMAN  | 11  | 12 | 20 | 8  | -0.3169  | -0.232956491 | 0.091116285  | 0.083945444  | 0.40801822   | 0.324072776  | 0.945986605 | 0.440487894 | 0.538169521 |
| sp P60842 IF4A1_HUMAN  | 96  | 40 | 76 | 33 | -0.16454 | -0.134090281 | 0.286363142  | 0.030445206  | 0.45089863   | 0.420453423  | 0.966508031 | 0.00742058  | 0.004520629 |
| sp P51692 STA5B_HUMAN  | 41  | 4  | 7  | 3  | -0.32657 | -0.053245196 | 0.658991502  | 0.27332584   | 0.985562544  | 0.712236698  | 0.74101557  | 0.11268254  | 0.242072162 |
| sp P51161 FABP6_HUMAN  | 192 | 40 | 76 | 33 | 0.005392 | -0.083600226 | 0.151815706  | -0.088991835 | 0.146424097  | 0.235415932  | 0.653093206 | 0.425247952 | 0.077285119 |
| sp Q9H1E3 NUCK3_HUMAN  | 15  | 4  | 6  | 3  | -0.24323 | -0.290643712 | 1.909053721  | 0.533874303  | 2.152284312  | 1.618410009  | 0.853427779 | 0.205767346 | 0.33333906  |
| sp Q9H0R4 HDHD2_HUMAN  | 11  | 29 | 55 | 25 | -0.38148 | -0.105344769 | 0.152149096  | 0.276139358  | 0.533633223  | 0.257493865  | 0.125811237 | 0.005209323 | 0.193835042 |
| sp Q9NP79 VTA1_HUMAN   | 2   | 22 | 41 | 18 | 0.081402 | -0.071609832 | 0.156723741  | -0.153011832 | 0.075321742  | 0.28333573   | 0.513949511 | 0.893539983 | 0.277531466 |
| sp P98066 TSG6_HUMAN   | 1   | 40 | 76 | 33 | -0.07679 | -0.057004292 | 0.050763318  | 0.019789927  | 0.127557538  | 0.10776761   | 0.93668083  | 0.158778131 | 0.187433446 |
| sp Q06481 APLP2_HUMAN  | 24  | 40 | 76 | 33 | -0.33416 | -0.061016751 | 0.099758932  | 0.273145956  | 0.433921638  | 0.160775683  | 0.004598687 | 0.000117266 | 0.18283836  |
| sp P21399 ACOC_HUMAN   | 8   | 40 | 76 | 33 | -0.16954 | -0.097330072 | 0.108525329  | 0.072208503  | 0.278063903  | 0.205855401  | 0.615517287 | 0.008269648 | 0.034703102 |
| sp Q504Y2 PKDCC_HUMAN  | 43  | 40 | 76 | 33 | 0.046595 | -0.056143631 | -0.003646847 | -0.102738116 | -0.050241375 | 0.052496785  | 0.114944141 | 0.695047312 | 0.603728589 |
| sp P62960 RL10A_HUMAN  | 28  | 23 | 41 | 17 | -0.11861 | -0.050057588 | 0.297363194  | 0.068549369  | 0.415970172  | 0.347420782  | 0.872163021 | 0.06455696  | 0.062455814 |
| sp P01236 PRL_HUMAN    | 21  | 24 | 49 | 22 | -0.28144 | -0.127720008 | 0.190111353  | 0.153716534  | 0.471547895  | 0.317831361  | 0.440501836 | 0.005706607 | 0.041076729 |
| sp P25788 PSA3_HUMAN   | 22  | 40 | 76 | 33 | -0.44956 | -0.217854065 | 0.400699658  | 0.231706004  | 0.850259727  | 0.1681553723 | 0.141381352 | 1.01E-07    |             |
| sp Q14737 PDCD5_HUMAN  | 14  | 13 | 27 | 12 | -0.67007 | -0.410843468 | 0.049206567  | 0.259224938  | 0.719274973  | 0.460050035  | 0.811576092 | 0.32691289  | 0.539882023 |
| sp Q00194 RB27B_HUMAN  | 16  | 40 | 76 | 33 | 0.035361 | 0.109384775  | 0.27326329   | 0.074023752  | 0.240965306  | 0.166941553  | 0.751672594 | 0.128903438 | 0.283205613 |
| sp Q8WV52 F151A_HUMAN  | 5   | 30 | 56 | 24 | -0.26128 | -0.023936667 | -0.030377714 | 0.28521222   | 0.230897839  | -0.054314381 | 0.245775113 | 0.500412262 | 0.956420378 |
| sp P01130 LDLR_HUMAN   | 113 | 40 | 76 | 33 | -0.10144 | -0.03031294  | 0.270434734  | 0.071130592  | 0.371878267  | 0.300747675  | 0.620678075 | 0.324243824 | 0.009093057 |
| sp P60981 DEST_HUMAN   | 22  | 40 | 76 | 33 | 0.034237 | -0.169838379 | 0.092787272  | -0.204112113 | 0.058549967  | 0.262671151  | 0.353825615 | 0.942143045 | 0.222422411 |
| sp Q9V281 COF2_HUMAN   | 97  | 7  | 13 | 6  | 0.413198 | 0.770429476  | 1.040904547  | 0.357231734  | 0.627706608  | 0.270475071  | 0.622939396 | 0.367321827 | 0.80282256  |
| sp Q99650 OSMR_HUMAN   | 4   | 40 | 76 | 33 | 0.155494 | 0.113459315  | 0.181370753  | -0.04203447  | 0.025876967  | 0.067911437  | 0.671105031 | 0.900668911 | 0.402901524 |
| sp Q9H361 PABP3_HUMAN  | 30  | 40 | 76 | 33 | -0.172   | -0.118554807 | 0.304786794  | 0.05344671   | 0.47678921   | 0.4233416    | 0.816375349 | 4.09E-05    | 3.97E-05    |
| sp Q99941 ATP6B_HUMAN  | 24  | 40 | 76 | 33 | 0.036678 | 0.036639231  | 0.027548085  | -3.86E-05    | -0.009129765 | -0.009091146 | 0.966604916 | 0.966604916 | 0.95805386  |
| sp Q702N8 XIRP1_HUMAN  | 5   | 4  | 6  | 3  | -0.06484 | -0.014239519 | 0.824595702  | 0.050603479  | 0.8894387    | 0.388835221  | 0.901002856 | 0.188108967 | 0.17839664  |
| sp Q8VVQ1 CANT1_HUMAN  | 1   | 40 | 76 | 33 | 0.021111 | 0.196580853  | 0.276370962  | 0.175464991  | 0.255260019  | 0.079790109  | 3.29E-05    | 4.74E-07    | 0.13049872  |
| sp Q8VUW4 POC61_HUMAN  | 119 | 40 | 76 | 33 | -0.11292 | -0.028997675 | 0.195898287  | 0.083919819  | 0.312506781  | 0.228586962  | 0.403988456 | 0.000311005 | 0.003595854 |
| sp P42126 EC1L_HUMAN   | 1   | 40 | 76 | 33 | -0.16136 | -0.045357055 | 0.142611229  | 0.206713168  | 0.303967342  | 0.097254174  | 0.0104873   | 0.508920349 | 0.538982023 |
| sp Q9UKV8 AGO2_HUMAN   | 3   | 37 | 69 | 30 | -0.15356 | -0.071916049 | 0.167408894  | 0.081642077  | 0.32096522   | 0.239324943  | 0.580544953 | 0.00417107  | 0.020054647 |
| sp Q12906 ILF3_HUMAN   | 147 | 40 | 76 | 33 | -0.27543 | -0.131706217 | 0.163708261  | 0.143719813  | 0.439134292  | 0.295414478  | 0.256768275 | 0.000278494 | 0.007699806 |
| sp Q12913 PTPRJ_HUMAN  | 7   | 40 | 76 | 33 | 0.263511 | 0.193336655  | -0.034453251 | -0.070174143 | -0.297964040 | -0.227789906 | 0.036298842 | 5.06E-14    | 1.05E-11    |
| sp Q94933 SLIK3_HUMAN  | 1   | 40 | 76 | 33 | 0.104755 | 0.109955594  | -0.229708794 | 0.005200919  | -0.33464348  | -0.339664389 | 0.999031686 | 0.067773085 | 0.030089758 |
| sp P28827 PTPRM_HUMAN  | 5   | 40 | 76 | 33 | 0.113045 | 0.089021111  | 0.066582702  | -0.024024026 | -0.046462434 | -0.022438409 | 0.889662804 | 0.739981692 | 0.914323395 |
| sp Q04917 1433F_HUMAN  | 2   | 40 | 76 | 33 | -0.08393 | -0.152575511 | 0.317657712  | -0.068645264 | 0.401587959  | 0.470233224  | 0.868729955 | 0.000327202 | 0.00132006  |
| sp Q4VXU2 PAP1L_HUMAN  | 21  | 36 | 69 | 30 | -0.35828 | -0.301770973 | 0.075693842  | 0.056513177  | 0.433977992  | 0.377464816  | 0.841446751 | 0.001403103 | 0.001723266 |
| sp P27348 1433T_HUMAN  | 13  | 40 | 76 | 33 | -0.25805 | -0.149347771 | 0.251477453  | 0.108705229  | 0.509530453  | 0.400825224  | 0.60241251  | 0.000758496 | 0.003226708 |
| sp P31946 1433B_HUMAN  | 10  | 40 | 76 | 33 | -0.17466 | -0.23681362  | 0.30341794   | -0.059023725 | 0.478075577  | 0.537099302  | 0.896554367 | 0.000624615 | 0.000262405 |
| sp Q9NQ53 NETC3_HUMAN  | 13  | 40 | 76 | 33 | -0.00575 | -0.024263938 | 0.096108957  | -0.018517425 | 0.10185547   | 0.120372896  | 0.909693118 | 0.144023068 | 0.033613385 |
| sp Q9UKY7 CDV3_HUMAN   | 16  | 40 | 76 | 28 | -0.06272 | -0.119283203 | 0.421728055  | -0.056559337 | 0.484451921  | 0.541011258  | 0.890145625 | 0.003486455 | 0.001500788 |
| sp P08637 FCG3A_HUMAN  | 2   | 37 | 69 | 30 | -0.31379 | -0.07243856  | 0.164899075  | 0.241350914  | 0.478688549  | 0.237337635  | 0.060340471 | 0.000790589 | 0.093622031 |
| sp P61916 NPC2_HUMAN   | 4   | 40 | 76 | 33 | -0.04654 | 0.007275255  | 0.368785443  | 0.053814251  | 0.432324439  | 0.378510188  | 0.617499578 | 1.24E-08    | 1.83E-08    |
| sp Q86Y79 JAML_HUMAN   | 2   | 40 | 76 | 33 | -0.17935 | -0.113011228 | 0.189219759  | 0.06633686   | 0.368567847  | 0.302230987  | 0.614164636 | 7.48E-05    | 0.000267875 |
| sp P63010 AP2B1_HUMAN  | 3   | 40 | 76 | 33 | -0.15332 | -0.200031143 | 0.369853177  | -0.046710742 | 0.523173578  | 0.56988432   | 0.881696264 | 5.03E-05    | 0.000267875 |
| sp Q94769 ECM2_HUMAN   | 12  | 40 | 76 | 33 | 0.072605 | 0.056516112  | 0.153399867  | -0.01608887  | 0.080794886  | 0.096883755  | 0.873247579 | 0.099745501 | 0.015924693 |
| sp P49588 SYAC_HUMAN   |     |    |    |    |          |              |              |              |              |              |             |             |             |



|                        |     |    |    |    |           |               |              |              |              |              |             |             |             |
|------------------------|-----|----|----|----|-----------|---------------|--------------|--------------|--------------|--------------|-------------|-------------|-------------|
| sp P04054 PA21B_HUMAN  | 9   | 40 | 76 | 33 | -0.19658  | -0.004269493  | -0.031707468 | 0.19231546   | 0.164877484  | -0.027437975 | 0.152742636 | 0.382080351 | 0.966338048 |
| sp Q14508 WFCDC2_HUMAN | 13  | 40 | 76 | 33 | -1.3826   | -1.302509458  | -0.325046331 | 0.080093057  | 1.057556183  | 0.977463127  | 0.878619298 | 1.16E-06    | 4.03E-07    |
| sp P01859 GHG2_HUMAN   | 7   | 40 | 76 | 33 | -0.18204  | -0.120685139  | 0.013136108  | 0.061350846  | 0.195712273  | 0.133821428  | 0.777861684 | 0.177054574 | 0.352322295 |
| sp P11717 MPRI_HUMAN   | 16  | 40 | 76 | 33 | 0.071738  | 0.067760421   | 0.201935167  | -0.003977367 | 0.130197379  | 0.134174746  | 0.992109277 | 0.003946662 | 0.000642182 |
| sp P30086 PEBP1_HUMAN  | 1   | 40 | 76 | 33 | -0.14204  | -0.000800814  | 0.404649338  | 0.141241711  | 0.546691869  | 0.405450152  | 0.177519727 | 0.154E-07   | 1.12E-05    |
| sp P05161 ISG15_HUMAN  | 8   | 40 | 76 | 33 | -0.56885  | -0.022637958  | 0.150286693  | 0.54620845   | 0.7191331    | 0.172924651  | 1.86E-06    | 1.91E-07    | 0.272480933 |
| sp Q04760 IGUL_HUMAN   | 25  | 40 | 76 | 33 | -0.07746  | -0.041099664  | 0.282784825  | 0.118651373  | 0.360246735  | 0.241685162  | 0.194435693 | 6.45E-05    | 0.003236541 |
| sp P98159 VLDLR_HUMAN  | 36  | 40 | 76 | 33 | -0.07914  | -0.050531433  | 0.027894646  | 0.028612677  | 0.107038756  | 0.078426079  | 0.929541567 | 0.496186526 | 0.618876358 |
| sp P16581 LYAM2_HUMAN  | 2   | 40 | 76 | 33 | -0.10858  | -0.080787822  | 0.251369343  | 0.027791504  | 0.359948669  | 0.332157165  | 0.925301128 | 0.000253921 | 0.00013405  |
| sp Q96676 SREC2_HUMAN  | 157 | 40 | 76 | 33 | -0.00656  | -0.092745407  | 0.29031195   | -0.086183344 | 0.296575258  | 0.382758602  | 0.497994775 | 0.004390475 | 1.79E-05    |
| sp P17252 KPCA_HUMAN   | 1   | 10 | 21 | 9  | 0.000992  | 0.124239838   | 0.236062625  | 0.123247973  | 0.23507076   | 0.11822787   | 0.77887976  | 0.533521453 | 0.825587007 |
| sp P07477 TRY1_HUMAN   | 1   | 40 | 76 | 33 | -0.118633 | 0.106414072   | 0.148743315  | -0.012218598 | 0.030110644  | 0.042329243  | 0.979139732 | 0.915514357 | 0.801190766 |
| sp Q14314 FGL2_HUMAN   | 10  | 40 | 76 | 33 | -0.21237  | -0.073781698  | 0.098118569  | 0.138592875  | 0.310493142  | 0.171900267  | 0.054781052 | 7.93E-05    | 0.020563333 |
| sp Q9UK23 NAGPA_HUMAN  | 1   | 40 | 76 | 33 | 0.191227  | 0.168826488   | 0.043171273  | -0.022400583 | -0.148055798 | -0.125655215 | 0.737426085 | 0.000210901 | 0.000407396 |
| sp Q95428 PPN_HUMAN    | 1   | 40 | 76 | 33 | 0.019309  | 0.03002354    | 0.205617777  | 0.109693434  | 0.186308857  | 0.166615422  | 0.929605063 | 0.013376537 | 0.102433545 |
| sp P78552 I13R1_HUMAN  | 8   | 40 | 76 | 33 | 0.006806  | 0.002666849   | 0.258711791  | -0.004138784 | 0.066006157  | 0.070144941  | 0.994664466 | 0.394690203 | 0.264388075 |
| sp Q86TH1 ATL2_HUMAN   | 17  | 40 | 76 | 33 | -0.05033  | 0.077220703   | 0.416597349  | 0.127546489  | 0.466923135  | 0.339376647  | 0.201518959 | 1.74E-06    | 9.71E-05    |
| sp Q9ULV4 CORIC_HUMAN  | 16  | 40 | 76 | 33 | -0.14697  | -0.149568157  | 0.086590542  | -0.002596184 | 0.233562515  | 0.236158699  | 0.999855337 | 0.448864027 | 0.353645123 |
| sp Q98R76 COR1B_HUMAN  | 9   | 40 | 76 | 33 | -0.14703  | -0.201921878  | 0.15063118   | -0.054890274 | 0.297662784  | 0.352553058  | 0.896404511 | 0.114021507 | 0.022110506 |
| sp Q8W155 SLIK4_HUMAN  | 7   | 25 | 48 | 21 | 0.344418  | 0.177491572   | 0.207318503  | -0.166926428 | -0.137099496 | 0.029826932  | 0.101347087 | 0.356856416 | 0.930993509 |
| sp P06731 CEAM5_HUMAN  | 1   | 4  | 6  | 3  | -0.13024  | -0.041305672  | 0.744486561  | 0.571546563  | 0.874727452  | 0.303180889  | 0.706739647 | 0.567017644 | 0.915973051 |
| sp P07203 GPX1_HUMAN   | 3   | 32 | 63 | 27 | -0.13805  | -0.125591183  | 0.184064708  | 0.012462706  | 0.322118597  | 0.309655891  | 0.993611779 | 0.57565514  | 0.03391693  |
| sp Q8NHV5 RLA0L_HUMAN  | 2   | 40 | 76 | 33 | -0.35629  | -0.166352771  | 0.184682703  | 0.189937532  | 0.822173006  | 0.632325474  | 0.162310079 | 2.33E-09    | 1.83E-07    |
| sp Q13867 BLMH_HUMAN   | 1   | 40 | 76 | 33 | -0.06557  | -0.019860967  | 0.250828891  | 0.045713853  | 0.316403711  | 0.270689858  | 0.737326053 | 9.89E-05    | 0.000177804 |
| sp Q9NY19 TMDD3_HUMAN  | 9   | 17 | 35 | 15 | -0.36651  | -0.07500991   | 0.16681336   | 0.291501252  | 0.783192498  | 0.491691246  | 0.385827749 | 0.01137754  | 0.08916676  |
| sp P51858 HDFG_HUMAN   | 10  | 32 | 62 | 28 | -0.07412  | -0.05397265   | 0.468570942  | 0.128092628  | 0.542690921  | 0.414598292  | 0.68929475  | 0.01111759  | 0.032245995 |
| sp Q9UL46 PSME2_HUMAN  | 35  | 40 | 76 | 33 | -0.16594  | -0.0017931937 | 0.332673701  | 0.148011158  | 0.498617218  | 0.350605637  | 0.139426001 | 1.02E-06    | 0.000116574 |
| sp P78509 RELN_HUMAN   | 14  | 40 | 76 | 33 | 0.19313   | 0.200121807   | 0.349912537  | 0.006991464  | 0.156782193  | 0.14979073   | 0.986929014 | 0.0126889   | 0.006481555 |
| sp P50053 KHK_HUMAN    | 1   | 8  | 14 | 6  | 0.0401    | 0.049079681   | 0.343576742  | 0.008979626  | 0.303476688  | 0.294497062  | 0.998598043 | 0.356575316 | 0.30675871  |
| sp Q13228 SBP1_HUMAN   | 5   | 40 | 76 | 33 | 0.201723  | 0.393090055   | 0.640658961  | 0.191367422  | 0.438936329  | 0.247586907  | 0.014366143 | 7.79E-07    | 0.002196868 |
| sp Q92496 FHR4_HUMAN   | 8   | 40 | 76 | 33 | -0.04066  | -0.059648774  | 0.004969077  | -0.018986138 | 0.045631713  | 0.064617851  | 0.955885858 | 0.835543585 | 0.633113242 |
| sp Q17FX5 CHST7_HUMAN  | 5   | 40 | 76 | 33 | 0.041682  | 0.050993152   | 0.279428874  | 0.009310718  | 0.237746439  | 0.228435721  | 0.980141925 | 0.202407004 | 6.52E-05    |
| sp P11610 ARP2_HUMAN   | 7   | 40 | 76 | 33 | -0.02665  | -0.083206882  | 0.171809641  | -0.056552686 | 0.198463837  | 0.255016523  | 0.834737422 | 0.120145138 | 0.043837557 |
| sp P48426 PI42A_HUMAN  | 7   | 40 | 76 | 33 | -0.08066  | -0.023082753  | 0.302345532  | 0.057579692  | 0.383007977  | 0.325428285  | 0.886128011 | 0.028410888 | 0.03760742  |
| sp Q5VY43 PEAR1_HUMAN  | 2   | 40 | 76 | 33 | 0.156371  | 0.124578936   | 0.078164841  | -0.031792164 | -0.078206259 | -0.046414095 | 0.625334154 | 0.145114502 | 0.149668465 |
| sp P52823 STC1_HUMAN   | 18  | 6  | 14 | 7  | 0.023067  | -0.259113836  | 0.578819627  | -0.282181246 | 0.555752218  | 0.837933464  | 0.594773018 | 0.226912962 | 0.013849447 |
| sp Q04446 GLGB_HUMAN   | 2   | 40 | 76 | 33 | -0.08099  | -0.068361392  | 0.121923719  | 0.012629141  | 0.202914252  | 0.190285111  | 0.970697991 | 0.006527498 | 0.003700174 |
| sp Q95897 NOE2_HUMAN   | 2   | 40 | 76 | 33 | 0.083777  | 0.091578939   | 0.90752328   | 0.007801519  | 0.006974908  | -0.000826611 | 0.991848961 | 0.995919322 | 0.99919322  |
| sp Q15435 PP1R7_HUMAN  | 18  | 40 | 76 | 33 | -0.22515  | -0.143617446  | 0.124434805  | 0.081530668  | 0.349582919  | 0.268052251  | 0.406340024 | 3.01E-05    | 0.000346911 |
| sp P09958 FURIN_HUMAN  | 25  | 10 | 20 | 10 | 0.098563  | 0.202810031   | 0.314438848  | 0.122018466  | 0.442825723  | 0.320807317  | 0.617555275 | 0.01407403  | 0.046175067 |
| sp Q9UBW8 CSNTA_HUMAN  | 3   | 4  | 6  | 3  | 0.039803  | 0.168491914   | 0.001582195  | 0.1286893    | -0.038220419 | -0.166990719 | 0.390020543 | 0.936988546 | 0.279784202 |
| sp P11413 G6PD_HUMAN   | 2   | 40 | 76 | 33 | -0.34941  | -0.274410765  | 0.217794693  | 0.074998588  | 0.567204046  | 0.492205458  | 0.864609885 | 0.260250763 | 0.005281128 |
| sp P10645 CMGA_HUMAN   | 9   | 40 | 76 | 33 | -0.02011  | -0.185809101  | 0.262882237  | -0.165699942 | 0.282991396  | 0.448691338  | 0.162160068 | 0.027459018 | 2.16E-05    |
| sp P35030 TRY3_HUMAN   | 2   | 40 | 76 | 33 | 0.108814  | -0.059306606  | 0.076135193  | -0.168120213 | -0.032678414 | 0.135441799  | 0.009697086 | 0.88108392  | 0.067614984 |
| sp P21266 GSTM3_HUMAN  | 23  | 40 | 76 | 33 | -0.1396   | 0.005811232   | 0.359859991  | 0.145414988  | 0.499463747  | 0.354048759  | 0.17013086  | 2.43E-06    | 0.000184995 |
| sp P48060 GLP1_HUMAN   | 4   | 33 | 62 | 28 | 0.298762  | 0.344817879   | 0.283004079  | 0.046055998  | -0.015721402 | -0.061777399 | 0.875232809 | 0.989120799 | 0.806902987 |
| sp P08238 HS90B_HUMAN  | 2   | 40 | 76 | 33 | -0.0372   | 0.009111358   | 0.426323695  | 0.046308935  | 0.463330272  | 0.417021337  | 0.889142075 | 0.000535356 | 0.000931186 |
| sp Q99466 NOTC4_HUMAN  | 5   | 40 | 76 | 33 | 0.013242  | -0.005224119  | -0.006303051 | -0.018466509 | -0.019545441 | -0.001078931 | 0.929664061 | 0.943053327 | 0.999772539 |
| sp Q06074 TPST2_HUMAN  | 20  | 4  | 7  | 3  | 0.098164  | 0.119162914   | 0.305059781  | 0.020998507  | 0.206895374  | 0.185896867  | 0.967453064 | 0.162226394 | 0.105251523 |
| sp Q9NTU7 CBLN4_HUMAN  | 4   | 40 | 76 | 33 | 0.215563  | 0.131832302   | -0.383469298 | -0.083730267 | -0.599031867 | -0.5153016   | 0.4029073   | 6.82E-12    | 2.38E-11    |
| sp P23435 CBLN1_HUMAN  | 6   | 40 | 76 | 33 | 0.265362  | 0.009369555   | -0.314494551 | -0.255991988 | -0.579856095 | -0.323864106 | 0.290294233 | 9.44E-09    | 0.000322634 |
| sp Q8IUK8 CBLN2_HUMAN  | 3   | 37 | 69 | 30 | 0.497742  | 0.324586265   | 0.00424122   | -0.17315618  | -0.493501225 | -0.320345045 | 0.251920853 | 0.000711954 | 0.018656742 |
| sp Q9NP84 TNR12_HUMAN  | 9   | 26 | 40 | 76 | 33        | -0.88015      | -0.878124569 | 0.12707055   | 0.002025204  | 0.100722032  | 1.005195119 | 0.999913953 | 2.35E-06    |
| sp P10599 THIO_HUMAN   | 4   | 40 | 76 | 33 | -0.16707  | -0.010094679  | 0.482406575  | 0.156973614  | 0.649474868  | 0.492501254  | 0.18671813  | 3.48E-08    | 1.21E-06    |
| sp P11142 HSP7C_HUMAN  | 2   | 40 | 76 | 33 | -0.06812  | -0.026920031  | 0.375715055  | 0.04119545   | 0.443830506  | 0.402635086  | 0.912479495 | 0.001058897 | 0.000782208 |
| sp Q05655 KPCD_HUMAN   | 38  | 15 | 28 | 11 | -0.18259  | -0.323322737  | 0.160827632  | -0.140733774 | 0.343416595  | 0.484150369  | 0.709169    | 0.272513823 | 0.04573299  |
| sp P48506 GSH1_HUMAN   | 1   | 40 | 76 | 33 | -0.39166  | -0.071624713  | 0.28493752   | 0.320036665  | 0.67659913   | 0.356562465  | 0.000110669 | 2.04E-11    | 5.22E-05    |
| sp Q95185 UNC5C_HUMAN  | 20  | 30 | 55 | 23 | -0.0253   | -0.013648566  | 0.255259492  | 0.01164901   | 0.280557067  | 0.268908057  | 0.987932485 | 0.011592489 | 0.006329618 |
| sp P14207 FOLR2_HUMAN  | 3   | 40 | 76 | 33 | -0.14034  | -0.060280505  | 0.159666946  | 0.080057186  | 0.300004638  | 0.219947451  | 0.378310842 | 0.000162664 | 0.00220803  |
| sp Q9NP83 ILLAP_HUMAN  | 1   | 40 | 76 | 33 | 0.141183  | 0.170276921   | -0.13460036  | 0.029093053  | -0.275783451 | -0.304877281 | 0.785491061 | 0.000166666 | 3.46E-09    |
| sp Q06067 FAIM3_HUMAN  | 27  | 40 | 76 | 33 | 0.007692  | 0.115997188   | 0.151320444  | 0.108305102  | 0.143628358  | 0.035232556  | 0.170434374 | 0.117791097 | 0.845296926 |
| sp Q98R9N TM2D3_HUMAN  | 1   | 13 | 27 | 13 | -0.10204  | -0.014182027  | -0.06450148  | 0.087853352  | 0.037485232  | -0.050368121 | 0.314282793 | 0.852268793 | 0.678746844 |
| sp P11362 FGFR1_HUMAN  | 10  | 40 | 76 | 33 | 0.204572  | 0.149975654   | 0.017493467  | -0.054596508 | -0.187078695 | -0.132482186 | 0.302452031 | 0.00012668  | 0.002751575 |
| sp P05106 ITB3_HUMAN   | 6   | 40 | 76 | 33 | -0.57087  | -0.289532118  | -0.24270006  | 0.281335465  | 0.328167522  | 0.046832057  | 0.042059337 | 0.050764182 | 0.923466709 |
| sp Q96T41 NIB2A_HUMAN  | 3   | 40 | 76 | 33 | 0.124623  | 0.10460961    | 0.113989295  | -0.020013404 | -0.010633269 | 0.009380135  | 0.874468149 | 0.974182225 | 0.974431233 |
| sp Q9UL13 HEG1_HUMAN   | 41  | 40 | 76 | 33 | -0.192811 | -0.145056916  | 0.183472614  | -0.047754042 | -0.00933829  | 0.038415753  |             |             |             |

|                       |     |    |    |    |           |              |              |              |              |              |             |              |             |
|-----------------------|-----|----|----|----|-----------|--------------|--------------|--------------|--------------|--------------|-------------|--------------|-------------|
| sp Q14697 GANAB_HUMAN | 31  | 40 | 76 | 33 | -0.06303  | 0.031931133  | 0.379093931  | 0.094959618  | 0.442122417  | 0.347162799  | 0.204910387 | 1.99E-09     | 8.95E-08    |
| sp P20908 COSA1_HUMAN | 6   | 40 | 76 | 33 | -0.241    | -0.195779948 | 0.575448015  | 0.045222163  | 0.816450126  | 0.771227963  | 0.906316907 | 8.19E-09     | 9.55E-10    |
| sp 000629 IMA3_HUMAN  | 2   | 4  | 7  | 3  | 0.050546  | 0.020761915  | 0.03609751   | -0.029784291 | 0.315551303  | 0.345335595  | 0.991784092 | 0.554447665  | 0.429871972 |
| sp P20042 IF2B_HUMAN  | 132 | 40 | 76 | 33 | -0.12475  | -0.026172971 | 0.326903781  | 0.098577161  | 0.451653913  | 0.353076752  | 0.605660404 | 0.001118326  | 0.004707319 |
| sp P09104 ENOG_HUMAN  | 4   | 40 | 76 | 33 | -0.02157  | -0.049490402 | -0.03433117  | -0.027844661 | -0.012763439 | 0.015078232  | 0.940223269 | 0.9901097063 | 0.984245196 |
| sp P08254 MMP3_HUMAN  | 6   | 40 | 76 | 33 | 0.03444   | -0.068066899 | 0.056720865  | -0.10250669  | 0.022281074  | 0.124787764  | 0.445172038 | 0.97374753   | 0.349822996 |
| sp Q96Q06 PLIN4_HUMAN | 139 | 4  | 6  | 3  | 0.071308  | 0.111021747  | 1.036226279  | 0.039714117  | 0.9649191    | 0.925204983  | 0.996620663 | 0.286352801  | 0.264499558 |
| sp G6UJW5 OLFL1_HUMAN | 3   | 40 | 76 | 33 | 0.069336  | 0.066637488  | 0.111651741  | -0.002698147 | 0.042316105  | 0.045014252  | 0.99720664  | 0.604884357  | 0.48568858  |
| sp Q10567 AP1B1_HUMAN | 5   | 40 | 76 | 33 | -0.10173  | -0.138793332 | 0.333598051  | -0.037062377 | 0.435329005  | 0.472391383  | 0.948153775 | 0.008027196  | 0.000846999 |
| sp P35754 GLRX1_HUMAN | 29  | 40 | 76 | 33 | -0.85434  | -0.568959001 | 0.115368385  | 0.285384954  | 0.96971234   | 0.684327386  | 0.062062301 | 5.10E-09     | 2.84E-06    |
| sp Q09471 PFD5_HUMAN  | 20  | 22 | 42 | 17 | -0.16234  | 0.085572314  | 0.228120697  | 0.247912205  | 0.390460588  | 0.142548383  | 0.108491935 | 0.027879796  | 0.531597781 |
| sp Q00169 PIPNA_HUMAN | 5   | 7  | 14 | 7  | 0.003877  | 0.075812004  | 0.072705557  | 0.071934826  | 0.068828379  | -0.003106448 | 0.933853038 | 0.954054731  | 0.999871998 |
| sp Q14974 HMB1_HUMAN  | 1   | 40 | 76 | 33 | -0.22259  | -0.234879564 | 0.18178691   | -0.012286204 | 0.40438027   | 0.416666745  | 0.994610042 | 0.020645937  | 0.0056552   |
| sp Q09576 ST14_HUMAN  | 2   | 40 | 76 | 33 | -0.37644  | -0.341136124 | 0.17296556   | 0.035306402  | 0.549408086  | 0.514101684  | 0.958287162 | 0.001248423  | 0.000631532 |
| sp Q14696 MESD_HUMAN  | 2   | 37 | 69 | 29 | -0.06169  | -0.020988538 | 0.339485515  | 0.040703441  | 0.401177494  | 0.360474053  | 0.897290205 | 0.001331967  | 0.001221305 |
| sp P27797 CALR_HUMAN  | 4   | 40 | 76 | 33 | -0.08299  | -0.028629574 | 0.531759992  | 0.054358416  | 0.614747982  | 0.560389566  | 0.797468226 | 3.92E-08     | 1.67E-08    |
| sp Q9UIW2 PLX1_HUMAN  | 16  | 40 | 76 | 33 | 0.034166  | 0.014677663  | 0.111657278  | -0.01948821  | 0.077491405  | 0.096979615  | 0.81754039  | 0.116129192  | 0.014957522 |
| sp P54819 KAD2_HUMAN  | 28  | 37 | 69 | 30 | -0.01177  | -0.06262794  | 0.280539144  | -0.050861164 | 0.29230592   | 0.343167084  | 0.855164962 | 0.032447022  | 0.002983666 |
| sp G6IBS0 TWF2_HUMAN  | 4   | 40 | 76 | 33 | 0.066394  | -0.002538292 | 0.374283949  | -0.068932617 | 0.307889624  | 0.37682224   | 0.821058005 | 0.07099324   | 0.007245035 |
| sp P06213 INSR_HUMAN  | 5   | 21 | 42 | 17 | 0.127372  | 0.144345289  | 0.036236103  | 0.016973334  | -0.091135851 | -0.108109186 | 0.987794948 | 0.789238997  | 0.65204256  |
| sp P09972 ALDOC_HUMAN | 36  | 40 | 76 | 33 | 0.047322  | 0.040988708  | -0.032713493 | -0.006332792 | -0.080034993 | -0.073702201 | 0.986597257 | 0.231228594  | 0.206352549 |
| sp G6UJX9 NPN1_HUMAN  | 23  | 40 | 76 | 33 | -0.08504  | -0.040867506 | 0.068042243  | 0.044170637  | 0.153080387  | 0.108909749  | 0.79375771  | 0.152419416  | 0.295226788 |
| sp Q15370 ELOB_HUMAN  | 5   | 40 | 76 | 33 | -0.289546 | -0.302913263 | 0.270167398  | 0.01336681   | 0.430620944  | 0.417254134  | 0.988155226 | 0.206357925  | 9.15E-05    |
| sp Q09629 PRAP1_HUMAN | 7   | 40 | 76 | 33 | -0.166    | -0.171767688 | 0.314076726  | -0.005771404 | 0.480073011  | 0.485844415  | 0.997581045 | 2.94E-05     | 1.74E-06    |
| sp Q00013 EMH5_HUMAN  | 10  | 40 | 76 | 33 | -0.37381  | -0.265813922 | 0.104912113  | 0.107993105  | 0.47871914   | 0.370726035  | 0.674285103 | 0.006143907  | 0.019622255 |
| sp P55287 CAD11_HUMAN | 5   | 40 | 76 | 33 | 0.134456  | 0.118424877  | 0.387918417  | -0.016030999 | 0.253462541  | 0.26949354   | 0.962871934 | 0.002169704  | 0.00180847  |
| sp P63279 UBC9_HUMAN  | 15  | 23 | 41 | 18 | -0.15026  | -0.142150031 | 0.224439791  | 0.00811324   | 0.374703062  | 0.366589822  | 0.997402316 | 0.02770691   | 0.001484485 |
| sp Q09R11 ERBIN_HUMAN | 10  | 19 | 34 | 14 | -0.83919  | -0.464221635 | -0.833783933 | 0.374968587  | 0.005406287  | -0.3695623   | 0.575343133 | 0.999923184  | 0.645421856 |
| sp Q6NLC4 GALT6_HUMAN | 3   | 40 | 76 | 33 | 0.383465  | 0.323950626  | 0.398261781  | -0.059514321 | 0.014796833  | 0.074311154  | 0.398295065 | 0.961120003  | 0.284890083 |
| sp Q9Y316 MEMO1_HUMAN | 8   | 8  | 13 | 6  | 0.263275  | -0.281233504 | 0.147225246  | -0.544508713 | -0.116049963 | 0.42845875   | 0.213613787 | 0.949347389  | 0.440842242 |
| sp Q8T8G5 VTM2A_HUMAN | 1   | 40 | 76 | 33 | 0.034413  | -0.076670928 | -0.139057089 | -0.111084084 | -0.173470245 | -0.06238616  | 0.141456982 | 0.038874724  | 0.577146139 |
| sp P22303 ACES_HUMAN  | 5   | 36 | 69 | 30 | 0.181483  | 0.13645027   | 0.057506904  | -0.045032493 | -0.123975858 | -0.078943366 | 0.767666672 | 0.254387049  | 0.48946777  |
| sp P05121 PAI1_HUMAN  | 4   | 40 | 76 | 33 | -0.34254  | 0.032165671  | 0.208799663  | 0.374072746  | 0.551336738  | 0.176633992  | 0.000492989 | 1.63E-05     | 0.206513042 |
| sp P16157 ANK1_HUMAN  | 21  | 33 | 62 | 26 | -0.40746  | -0.090552314 | 0.510919122  | 0.316911709  | 0.918383145  | 0.601471437  | 0.082312119 | 3.21E-06     | 0.00071341  |
| sp Q16719 KYNU_HUMAN  | 15  | 29 | 55 | 25 | -0.2727   | -0.144326669 | 0.178135937  | 0.128375784  | 0.450838391  | 0.322462607  | 0.684056006 | 0.041077193  | 0.120067129 |
| sp Q9NS00 C1GLT_HUMAN | 1   | 7  | 14 | 5  | 0.104182  | 0.070233551  | 0.055519616  | -0.033948352 | -0.048662287 | -0.014713935 | 0.936753088 | 0.919585065  | 0.990331266 |
| sp Q00049 BIN1_HUMAN  | 8   | 22 | 41 | 18 | -0.76478  | -0.839207021 | -0.193810591 | -0.074431451 | 0.570964978  | 0.645396429  | 0.9316069   | 0.063441009  | 0.013038884 |
| sp Q01638 HLR1_HUMAN  | 9   | 40 | 76 | 33 | -0.25226  | -0.238360902 | 0.46369246   | 0.013894505  | 0.715624652  | 0.701730147  | 0.994668347 | 0.000129558  | 2.10E-05    |
| sp P50552 VASP_HUMAN  | 3   | 40 | 76 | 33 | -0.34894  | -0.529260503 | -0.17265513  | -0.180318952 | 0.176676036  | 0.356994988  | 0.38168952  | 0.527209179  | 0.039268283 |
| sp P47756 CAPZB_HUMAN | 7   | 40 | 76 | 33 | -0.22185  | -0.213229803 | 0.209877236  | 0.006825025  | 0.431732063  | 0.423107038  | 0.996956683 | 0.006705656  | 0.002477707 |
| sp P31749 AKT1_HUMAN  | 2   | 15 | 28 | 11 | 0.013476  | 0.093560782  | 0.110230819  | 0.080117138  | 0.096754775  | 0.016580637  | 0.882655425 | 0.888580583  | 0.956980645 |
| sp Q515H3 WDR44_HUMAN | 9   | 40 | 76 | 33 | -0.13793  | -0.114977148 | 0.136803502  | 0.022957553  | 0.274738303  | 0.25178075   | 0.971000454 | 0.991836811  | 0.049181338 |
| sp P20774 MIME_HUMAN  | 1   | 40 | 76 | 33 | 0.26511   | 0.172931036  | 0.331909455  | -0.092178518 | 0.066799902  | 0.158978419  | 0.207782472 | 0.562503555  | 0.018267705 |
| sp Q14980 XPO1_HUMAN  | 4   | 32 | 63 | 27 | -0.00735  | 0.140192734  | 0.574536294  | 0.14754508   | 0.581888639  | 0.434343559  | 0.322664046 | 1.89E-05     | 0.000315168 |
| sp P12883 MYH7_HUMAN  | 2   | 40 | 76 | 33 | -0.10036  | -0.305550988 | 0.99775136   | -0.205191722 | 0.198134402  | 0.403326124  | 0.125136361 | 0.259939741  | 0.001193601 |
| sp Q9BQ44 SOST_HUMAN  | 1   | 18 | 34 | 14 | 0.019923  | -0.170949623 | 0.389974329  | -0.190873115 | 0.370050837  | 0.560923951  | 0.328531866 | 0.066302209  | 0.00074088  |
| sp Q95084 PRS23_HUMAN | 4   | 37 | 69 | 30 | 0.063264  | 0.065847744  | 0.049414839  | 0.002584313  | -0.018349491 | -0.020932904 | 0.998609211 | 0.952804761  | 0.923801423 |
| sp Q02108 GCYA1_HUMAN | 3   | 40 | 76 | 33 | -0.14175  | -0.077058133 | 0.257472199  | 0.218810516  | 0.399224582  | 0.180414066  | 0.078378686 | 0.004102018  | 0.231578329 |
| sp Q13332 PTPR8_HUMAN | 13  | 40 | 76 | 33 | 0.161577  | 0.128591396  | -0.071360158 | -0.032985478 | -0.232937032 | -0.199951554 | 0.680535366 | 0.001955065  | 0.990331266 |
| sp P23284 PPIB_HUMAN  | 1   | 40 | 76 | 33 | -0.21479  | -0.04540357  | 0.151120439  | 0.169389103  | 0.365913112  | 0.196524009  | 0.124557841 | 0.001624481  | 0.086094585 |
| sp Q06H4C PDIU5_HUMAN | 16  | 22 | 41 | 17 | -0.41719  | -0.518964243 | 0.335764645  | -0.101776176 | 0.752952712  | 0.854728888  | 0.832574241 | 0.002248174  | 8.65E-05    |
| sp P48643 TCP_E_HUMAN | 9   | 36 | 69 | 30 | 0.143227  | 0.229696727  | 0.327382668  | 0.086470023  | 0.184155964  | 0.097685941  | 0.748034679 | 0.040765251  | 0.720849914 |
| sp P31937 SHIH0_HUMAN | 10  | 29 | 55 | 24 | -0.28717  | 0.006289767  | 0.269111612  | 0.293460029  | 0.556282337  | 0.262821845  | 0.054863088 | 0.001044659  | 0.126042263 |
| sp Q15126 PMVK_HUMAN  | 46  | 21 | 41 | 18 | -0.2736   | -0.176520699 | 0.209726008  | 0.097806694  | 0.483327401  | 0.386246707  | 0.913469416 | 0.216883726  | 0.282179343 |
| sp G6ZRP7 QSOX2_HUMAN | 5   | 40 | 76 | 33 | 0.008693  | 0.013383157  | 0.02487588   | 0.005145274  | 0.016182997  | 0.011037723  | 0.997055788 | 0.988158388  | 0.988158388 |
| sp P0DP23 CALM1_HUMAN | 126 | 40 | 76 | 33 | -0.23353  | -0.212735078 | 0.176535234  | 0.020792331  | 0.410062642  | 0.389270312  | 0.988812733 | 0.053484239  | 0.035301887 |
| sp P30041 PRDX6_HUMAN | 4   | 40 | 76 | 33 | -0.39156  | -0.06183631  | 0.332256157  | 0.32971713   | 0.723814197  | 0.394092467  | 0.006045019 | 1.93E-07     | 0.001779029 |
| sp Q75366 ENTP5_HUMAN | 6   | 40 | 76 | 33 | 0.069634  | 0.076130332  | 0.09886606   | 0.00649655   | 0.029232277  | 0.022735727  | 0.993390361 | 0.911596731  | 0.931218575 |
| sp Q13177 PAK2_HUMAN  | 7   | 36 | 69 | 30 | -0.1328   | -0.137638969 | 0.136008899  | -0.004840294 | 0.268807574  | 0.273647868  | 0.997971443 | 0.01595919   | 0.004489604 |
| sp Q43852 CALU_HUMAN  | 272 | 40 | 76 | 33 | -0.26332  | -0.050085396 | 0.088980914  | 0.313401223  | 0.352296742  | 0.038895518  | 0.004350935 | 0.008465411  | 0.002640248 |
| sp P09382 LEG1_HUMAN  | 1   | 40 | 76 | 33 | 0.033168  | 0.115787414  | 0.43411586   | 0.08261947   | 0.400947916  | 0.318328446  | 0.277581617 | 1.75E-08     | 4.06E-07    |
| sp Q60883 G37L1_HUMAN | 5   | 30 | 55 | 25 | -0.09879  | -0.239844654 | -0.10394466  | -0.141053629 | -0.005153635 | 0.135899994  | 0.662608311 | 0.999611244  | 0.712292509 |
| sp Q8WV75 ROBO4_HUMAN | 2   | 40 | 76 | 33 | 0.114322  | 0.089982902  | 0.149743429  | -0.024339386 | 0.035421141  | 0.059760527  | 0.875949934 | 0.823649691  | 0.497111319 |
| sp Q8NBF2 NHLCC_HUMAN | 16  | 40 | 76 | 33 | -0.26775  | -0.363102033 | 0.074786617  | -0.095352167 | 0.192963249  | 0.288315417  | 0.698910088 | 0.365926123  | 0.060626571 |
| sp Q12765 SCRN1_HUMAN | 1   | 19 | 34 | 15 | -0.15275  | -0.026176545 | 0.281412276  | 0.126576788  | 0.434165609  | 0.307588822  | 0.71659433  | 0.075539458  | 0.194193403 |
| sp Q9NZN3 EHD3_HUMAN  | 4   | 40 |    |    |           |              |              |              |              |              |             |              |             |

|                       |     |    |    |          |              |              |               |              |              |               |             |             |             |
|-----------------------|-----|----|----|----------|--------------|--------------|---------------|--------------|--------------|---------------|-------------|-------------|-------------|
| sp Q14656 TOR1A_HUMAN | 8   | 4  | 7  | 3        | 0.088368     | 0.142624131  | 0.395967007   | 0.054255802  | 0.307598678  | 0.253342876   | 0.974736981 | 0.589879113 | 0.642591134 |
| sp P40925 MDHC_HUMAN  | 4   | 40 | 76 | 33       | -0.11526     | 0.17570081   | 0.328027203   | 0.06044124   | 0.222767633  | 0.162326393   | 0.594856117 | 0.009413207 | 0.040800607 |
| sp P09244 TBCA_HUMAN  | 13  | 40 | 76 | 33       | -0.24048     | -0.141014845 | 0.442380991   | 0.099469904  | 0.664865783  | 0.565395836   | 0.681165122 | 2.25E-05    | 4.94E-05    |
| sp P48681 NEST_HUMAN  | 11  | 7  | 13 | 5        | -0.72611     | -0.840250483 | 1.158487457   | -0.114144301 | 1.88459364   | 1.998737941   | 0.97170759  | 0.016711404 | 0.004769422 |
| sp Q15555 MARE2_HUMAN | 12  | 40 | 76 | 33       | -0.16318     | -0.354016367 | -0.008259468  | -0.190839482 | 0.064917417  | 0.255756899   | 0.436238055 | 0.063407141 | 0.272083649 |
| sp P12277 KCRB_HUMAN  | 1   | 32 | 62 | 28       | -0.05305     | -0.242735247 | -0.334289547  | -0.189683068 | -0.281237369 | -0.0915543    | 0.354092189 | 0.20113142  | 0.799916485 |
| sp Q9N9Y7 B3GN2_HUMAN | 7   | 40 | 76 | 33       | 0.173281     | 0.13387899   | 0.065271779   | -0.039402187 | -0.108009398 | -0.068607211  | 0.188843266 | 0.000300668 | 0.013319661 |
| sp Q9UHL4 DPP2_HUMAN  | 6   | 32 | 62 | 27       | -0.04003     | -0.039168729 | 0.149459467   | 0.00086266   | 0.189490856  | 0.188628196   | 0.999961327 | 0.279536632 | 0.19877525  |
| sp Q9JUV8 SPB13_HUMAN | 44  | 7  | 14 | 5        | -0.00527     | 0.050683496  | -0.2501052447 | 0.055955554  | -0.045780389 | -0.101735942  | 0.934574963 | 0.972037498 | 0.838887673 |
| sp Q9BRK5 CAB45_HUMAN | 13  | 40 | 76 | 33       | -0.23021     | -0.165188008 | 0.220271897   | 0.065020128  | 0.450480033  | 0.385459905   | 0.602793186 | 1.06E-06    |             |
| sp Q8WVVU ITLN2_HUMAN | 7   | 40 | 76 | 33       | 0.085793     | -0.079515904 | 0.019470517   | -0.165308907 | -0.066322485 | 0.098986422   | 0.254234778 | 0.857210921 | 0.647000962 |
| sp P50395 GDI8_HUMAN  | 9   | 40 | 76 | 33       | 0.083629     | 0.152282603  | 0.446143736   | 0.068654004  | 0.362515137  | 0.293861133   | 0.600962888 | 0.000282701 | 0.000962888 |
| sp Q8I8W7 SPA12_HUMAN | 108 | 18 | 35 | 14       | -0.02007     | 0.225622328  | -0.245482418  | 0.245689838  | -0.225414909 | -0.471104746  | 0.612297042 | 0.759790877 | 0.225776804 |
| sp Q10471 GALT2_HUMAN | 6   | 40 | 76 | 33       | -0.07204     | -0.022247773 | 0.167477768   | 0.049794166  | 0.239519707  | 0.189725541   | 0.518546625 | 6.77E-05    | 0.000411851 |
| sp Q14C87 T132D_HUMAN | 4   | 8  | 14 | 6        | 0.127904     | 0.273560983  | -0.76850829   | 0.145665311  | -0.896412263 | -0.1042077573 | 0.938542653 | 0.219359093 | 0.08949218  |
| sp Q6JUV1 CSPG4_HUMAN | 3   | 40 | 76 | 33       | 0.125091     | 0.029400523  | 0.279367378   | -0.095690097 | 0.166276688  | 0.261966785   | 0.121311224 | 0.05195737  | 3.48E-06    |
| sp Q16531 DDB1_HUMAN  | 1   | 40 | 76 | 33       | -0.25379     | -0.183749524 | 0.260174805   | 0.070038984  | 0.513963312  | 0.443924328   | 0.787685922 | 0.000277363 | 0.000408441 |
| sp Q727M8 B3GN8_HUMAN | 40  | 40 | 76 | 33       | 0.154531     | 0.085712374  | -0.022811796  | -0.068818472 | -0.177342642 | -0.108524717  | 0.22120066  | 0.001400299 | 0.03925346  |
| sp Q9Y5C1 ANGL3_HUMAN | 10  | 40 | 76 | 33       | 0.018562     | 0.044960455  | 0.247354158   | 0.026398358  | 0.228792062  | 0.202393703   | 0.880162557 | 0.001992272 | 0.000242262 |
| sp P45378 TNNT3_HUMAN | 2   | 11 | 20 | 9        | -0.80302     | -1.035245392 | 0.565286662   | -0.232228386 | 1.368303668  | 1.600532054   | 0.862893987 | 0.039058204 | 0.005336952 |
| sp Q9NZU0 FLRT3_HUMAN | 2   | 42 | 72 | 19       | 0.090399     | 0.189111253  | 0.418346926   | 0.098712487  | 0.327948159  | 0.292325673   | 0.679075053 | 0.045901193 | 0.14919511  |
| sp P14735 IDE_HUMAN   | 2   | 32 | 62 | 27       | -0.1234      | 0.017363795  | 0.08959927    | 0.14076653   | 0.213002005  | 0.072235475   | 0.139278958 | 0.045495935 | 0.624311738 |
| sp Q96B3 AIDA_HUMAN   | 2   | 4  | 7  | 3        | 0.204489     | 0.170740902  | 0.349132953   | -0.033748347 | 0.144643705  | 0.178392051   | 0.929127259 | 0.429807339 | 0.227876981 |
| sp P08397 HEM3_HUMAN  | 2   | 40 | 76 | 33       | -0.30301     | -0.005561344 | 0.35639975    | 0.297447763  | 0.659408725  | 0.361961904   | 0.006734263 | 2.01E-07    | 0.00164051  |
| sp Q9UNN6 PSD13_HUMAN | 2   | 4  | 7  | 3        | 0.307914     | 0.500701072  | 0.35281905    | 0.192786638  | 0.042367471  | -0.150419168  | 0.771368416 | 0.991388416 | 0.876355737 |
| sp P08887 IL6RA_HUMAN | 32  | 40 | 76 | 33       | 0.036764     | 0.061304133  | -0.008197424  | 0.024540393  | -0.044961165 | -0.069501557  | 0.912105151 | 0.808317014 | 0.525144738 |
| sp P53618 COPB_HUMAN  | 2   | 7  | 14 | 6        | -0.12209     | -0.111871257 | 0.063599416   | 0.233958438  | 0.757686597  | 0.523728159   | 0.591209947 | 0.00562275  | 0.111328366 |
| sp Q52PR3 CD276_HUMAN | 15  | 40 | 76 | 33       | -0.06203     | -0.026642474 | 0.298198138   | 0.035383252  | 0.360223864  | 0.324840612   | 0.785844648 | 3.11E-07    | 1.97E-07    |
| sp Q99715 COCA1_HUMAN | 10  | 40 | 76 | 33       | 0.067394     | 0.03306853   | 0.040324122   | -0.03432526  | -0.027069669 | 0.007255592   | 0.685311462 | 0.84999192  | 0.985228689 |
| sp Q6ICL3 TNG2_HUMAN  | 22  | 40 | 76 | 33       | 0.622236     | 0.72615182   | 1.008805319   | 0.103916081  | 0.386569558  | 0.282653499   | 0.59646605  | 0.008868061 | 0.038307752 |
| sp Q08257 QOR_HUMAN   | 2   | 40 | 76 | 33       | -0.09703     | -0.01343668  | 0.077948683   | 0.083590971  | 0.174976334  | 0.091385363   | 0.494173678 | 0.122450482 | 0.477408832 |
| sp Q9NQ76 MEPE_HUMAN  | 2   | 40 | 76 | 33       | -0.13459     | 0.024660455  | 0.162047111   | 0.159255052  | 0.296641711  | 0.137386659   | 0.079183168 | 0.000281671 | 0.18788004  |
| sp P39687 AN32A_HUMAN | 4   | 29 | 55 | 25       | -0.33859     | -0.210593079 | 0.391054201   | 0.128001082  | 0.729647462  | 0.60164728    | 0.610289847 | 4.22E-05    | 0.001376822 |
| sp Q13813 SPTN1_HUMAN | 1   | 29 | 55 | 25       | -0.56171     | -0.315832639 | 0.321442487   | 0.245880683  | 0.792957608  | 0.547076926   | 0.225379667 | 5.15E-05    | 0.001870797 |
| sp Q14393 GAS6_HUMAN  | 15  | 40 | 76 | 33       | 0.011766     | 0.14643383   | 0.27028648    | 0.13466758   | 0.25852023   | 0.12385265    | 0.030140113 | 0.000206546 | 0.072515451 |
| sp P68133 ACT5_HUMAN  | 2   | 40 | 76 | 33       | 0.004768     | 0.035225495  | 0.044454468   | 0.03045757   | 0.039686544  | 0.009228973   | 0.8999168   | 0.883811758 | 0.991526448 |
| sp Q562R1 ACTBL_HUMAN | 22  | 40 | 76 | 33       | -0.24186     | -0.042994982 | 0.019959262   | -0.16113061  | 0.261823635  | 0.422954245   | 0.530422243 | 0.136989414 | 0.024343473 |
| sp P02144 MYC_HUMAN   | 6   | 40 | 76 | 33       | -0.86123     | -0.977784507 | -0.397969153  | -0.116559278 | -0.166526076 | 0.579815354   | 0.70804701  | 0.026346093 | 0.000900014 |
| sp Q10888 BST1_HUMAN  | 1   | 40 | 76 | 33       | 0.103542     | 0.082387226  | -0.137681086  | -0.021155179 | -0.24123491  | -0.220068312  | 0.922770178 | 0.001182402 | 0.000814392 |
| sp Q08174 PCDH1_HUMAN | 3   | 40 | 76 | 33       | -0.06347     | -0.073754483 | 0.324703189   | 0.020714445  | 0.388172117  | 0.367457672   | 0.922387645 | 5.39E-08    | 7.11E-09    |
| sp P78565 PI42B_HUMAN | 2   | 40 | 76 | 33       | -0.15835     | -0.033506055 | 0.271845528   | 0.124841304  | 0.430192886  | 0.305351583   | 0.500036728 | 0.004463341 | 0.029164169 |
| sp Q6NW40 RGM6B_HUMAN | 7   | 40 | 76 | 33       | -0.03175     | -0.095770974 | 0.067552462   | -0.064025874 | 0.099297562  | 0.163323435   | 0.615429985 | 0.040022994 | 0.066562764 |
| sp Q15274 NADC_HUMAN  | 6   | 7  | 14 | 6        | -0.30538     | 0.282633174  | 0.259917317   | 0.588014327  | 0.56529847   | -0.022715856  | 0.052676461 | 0.139456721 | 0.995484284 |
| sp Q13367 RAB32_HUMAN | 4   | 7  | 14 | 3        | -0.58172     | -0.279721263 | 0.225052878   | 0.301998788  | 0.806772929  | 0.504774141   | 0.613205356 | 0.132243802 | 0.344405745 |
| sp Q15121 PEA13_HUMAN | 3   | 18 | 34 | 15       | 0.192503     | 0.20238187   | 0.473443642   | 0.009878851  | 0.280940624  | 0.271061772   | 0.996274983 | 0.132939297 | 0.093168223 |
| sp P22314 UBA1_HUMAN  | 1   | 40 | 76 | 33       | -0.13881     | -0.106269457 | 0.172415453   | 0.032543583  | 0.311228493  | 0.27868491    | 0.927877034 | 0.010970862 | 0.010051636 |
| sp P13611 CSPG2_HUMAN | 2   | 40 | 76 | 33       | -0.11294     | -0.013628699 | 0.33961399    | 0.099308431  | 0.44689853   | 0.347590098   | 0.280937345 | 1.81E-07    | 4.60E-05    |
| sp P29508 SPB3_HUMAN  | 18  | 34 | 15 | -0.85642 | -0.977297911 | -1.393020142 | -0.120873306  | -0.536595537 | -0.415722231 | 0.951733182   | 0.511904839 | 0.59878759  | 0.991475566 |
| sp P30153 ZAA4_HUMAN  | 15  | 40 | 76 | 33       | -0.28246     | -0.127310512 | 0.350180929   | 0.155150838  | 0.632642278  | 0.477491441   | 0.43066044  | 0.000150755 | 0.001477569 |
| sp Q15166 PON3_HUMAN  | 3   | 40 | 76 | 33       | 0.221849     | 0.158545197  | -0.289475651  | -0.06330357  | -0.511324417 | -0.448020848  | 0.536623547 | 9.56E-11    | 1.50E-10    |
| sp Q725N4 SDK1_HUMAN  | 10  | 40 | 76 | 33       | 0.052193     | -0.017375044 | 0.04414293    | -0.069568379 | -0.008050406 | 0.061517973   | 0.188315011 | 0.98335031  | 0.29183371  |
| sp Q727G0 TARSH_HUMAN | 111 | 40 | 76 | 33       | 0.082764     | 0.070378893  | 0.082058077   | -0.012385181 | -0.000705998 | 0.011679183   | 0.97041805  | 0.999932619 | 0.976814062 |
| sp P98153 IDD_HUMAN   | 5   | 21 | 41 | 19       | -0.20981     | -0.069243772 | 0.495943637   | 0.140562501  | 0.70574991   | 0.565187409   | 0.598138207 | 0.000267679 | 0.999133235 |
| sp Q95998 H18BP_HUMAN | 26  | 40 | 76 | 33       | -0.2223      | -0.116711495 | 0.369545819   | 0.105520046  | 0.591849359  | 0.486257314   | 0.403846793 | 8.46E-08    | 3.72E-07    |
| sp Q43529 CHSTA_HUMAN | 5   | 40 | 76 | 33       | 0.114736     | 0.061161674  | -0.076865765  | -0.053573916 | -0.191601355 | -0.138027439  | 0.318327623 | 9.49E-05    | 0.001719141 |
| sp P49591 SYSC_HUMAN  | 8   | 40 | 76 | 33       | 0.461254     | 0.480357555  | 0.678091038   | 0.019103223  | 0.216836706  | 0.197733483   | 0.990656901 | 0.437257016 | 0.416907306 |
| sp Q9N9R5 OLFL3_HUMAN | 18  | 40 | 76 | 33       | 0.041896     | 0.085085987  | 0.093491771   | 0.043189825  | 0.051595609  | 0.008405784   | 0.317942128 | 0.32350369  | 0.962174304 |
| sp Q9UJUE DBNL_HUMAN  | 1   | 40 | 76 | 33       | -0.13376     | -0.10261703  | 0.17079545    | 0.031138667  | 0.303835241  | 0.272696574   | 0.958802462 | 0.0601756   | 0.963310795 |
| sp P32321 DCTD_HUMAN  | 5   | 10 | 21 | 9        | 0.021348     | -0.017716041 | 0.279993703   | -0.039064158 | 0.258645585  | 0.297709743   | 0.968557103 | 0.386051367 | 0.193645136 |
| sp Q95260 ATE1_HUMAN  | 19  | 11 | 21 | 9        | -0.0489      | -0.188716711 | 0.003136427   | -0.139819503 | 0.052033644  | 0.191853147   | 0.799259025 | 0.978186916 | 0.369089016 |
| sp Q03167 TGBR3_HUMAN | 6   | 40 | 76 | 33       | 0.13397      | 0.085115738  | 0.164584042   | -0.048854269 | 0.030614035  | 0.079468304   | 0.293424501 | 0.715081334 | 0.0606472   |
| sp Q96H15 TIMD4_HUMAN | 3   | 40 | 76 | 33       | 0.00012      | 0.050823102  | 0.25588066    | 0.05070299   | 0.255767954  | 0.205064964   | 0.808162254 | 0.001550409 | 0.051203227 |
| sp Q00062 FCN1_HUMAN  | 8   | 40 | 76 | 33       | -0.07251     | -0.055782035 | 0.148802349   | 0.019731037  | 0.221315421  | 0.201584384   | 0.977430287 | 0.143429064 | 0.129015031 |
| sp Q14162 SRC_HUMAN   | 2   | 36 | 69 | 30       | 0.022962     | 0.115053948  | -0.093354541  | 0.092092063  | -0.116316425 | -0.208408488  | 0.444360999 | 0.02836999  | 0.020839927 |
| sp P52306 GDS1_HUMAN  | 19  | 28 | 55 | 25       | 0.183925     | 0.109164614  | 0.420095027   | -0.074760304 | 0.236170108  | 0.310930412   | 0.821378969 | 0.252567265 | 0.047955638 |
| sp P06060 MYL6_HUMAN  | 11  | 40 | 76 | 33</     |              |              |               |              |              |               |             |             |             |

|                        |    |    |    |    |          |              |              |              |              |              |             |             |             |
|------------------------|----|----|----|----|----------|--------------|--------------|--------------|--------------|--------------|-------------|-------------|-------------|
| sp Q96KP4 CNDP2_HUMAN  | 8  | 40 | 76 | 33 | -0.22969 | -0.138809183 | 0.218756825  | 0.090878401  | 0.448444409  | 0.357566008  | 0.659310351 | 0.001393374 | 0.004599584 |
| sp P08069 IGFR_HUMAN   | 1  | 7  | 14 | 6  | 0.285199 | 0.061705322  | -0.104236424 | -0.224213936 | -0.390155682 | -0.165941746 | 0.425555059 | 0.178873269 | 0.650849089 |
| sp P12109 CO6A1_HUMAN  | 6  | 40 | 76 | 33 | 0.061964 | 0.114923749  | 0.268038152  | 0.052959621  | 0.206074024  | 0.153114403  | 0.533758537 | 0.020320208 | 0.011908725 |
| sp Q15181 IPYR_HUMAN   | 2  | 8  | 13 | 6  | -0.14418 | -0.160851385 | 0.152778967  | -0.016674415 | 0.296955937  | 0.313630352  | 0.993570170 | 0.273314467 | 0.182570367 |
| sp P06280 AGAL_HUMAN   | 3  | 40 | 76 | 33 | -0.03053 | 0.004813408  | 0.260779127  | 0.035348419  | 0.291307539  | 0.255965719  | 0.751590395 | 6.43E-06    | 0.678E-06   |
| sp P51114 FXR1_HUMAN   | 55 | 4  | 6  | 3  | -0.03556 | -0.055119396 | 0.111939283  | -0.019557437 | 0.147501242  | 0.167058679  | 0.999835579 | 0.993345938 | 0.990061708 |
| sp P01871 IGHM_HUMAN   | 19 | 40 | 76 | 33 | -0.20809 | 0.030150366  | 0.01682015   | 0.238239804  | 0.224909587  | -0.013330216 | 0.05685049  | 0.168127293 | 0.991911667 |
| sp P04745 AMY1_HUMAN   | 1  | 40 | 76 | 33 | 0.138923 | -1.88E-05    | -0.228560639 | -0.138942207 | -0.367484058 | -0.228541852 | 0.228280158 | 0.00156028  | 0.032101831 |
| sp Q13275 SEM3F_HUMAN  | 21 | 40 | 76 | 33 | 0.103232 | 0.087115814  | -0.07226834  | -0.016116233 | -0.175500387 | -0.159384155 | 0.855359701 | 1.06E-05    | 6.37E-06    |
| sp P55157 NTP_HUMAN    | 45 | 36 | 69 | 30 | -0.014   | -0.113998281 | -0.04727904  | -0.099999373 | -0.033280132 | 0.066719241  | 0.375900639 | 0.927064475 | 0.678722097 |
| sp Q15185 TEBP_HUMAN   | 3  | 40 | 76 | 33 | -0.17215 | -0.137377268 | 0.23496243   | 0.034774246  | 0.407113944  | 0.372339698  | 0.944293123 | 0.005830252 | 0.004257446 |
| sp Q6P988 NOTUM_HUMAN  | 1  | 36 | 69 | 30 | 0.038547 | 0.113288839  | 0.128192851  | 0.07474221   | 0.089646223  | 0.014904013  | 0.014904013 | 0.587142639 | 0.000876331 |
| sp P62136 PP1A_HUMAN   | 29 | 40 | 76 | 33 | -0.24966 | -0.125144348 | 0.238888836  | 0.124513442  | 0.488546176  | 0.364032734  | 0.296599056 | 8.62E-06    | 0.000207437 |
| sp Q16543 CDC37_HUMAN  | 2  | 37 | 69 | 29 | -0.48387 | -0.485325199 | 0.045551271  | -0.001458647 | 0.529417823  | 0.53087647   | 0.999931951 | 0.00339362  | 0.000843598 |
| sp Q14554 PDIA5_HUMAN  | 2  | 40 | 76 | 33 | 0.074756 | 0.069945296  | 0.160942702  | -0.004810238 | 0.086187169  | 0.090997407  | 0.999043964 | 0.809531403 | 0.741231859 |
| sp Q14956 GPNMB_HUMAN  | 4  | 40 | 76 | 33 | 0.096983 | 0.063303223  | 0.140967704  | -0.033679633 | 0.043984847  | 0.077664481  | 0.714332806 | 0.673251353 | 0.212130875 |
| sp Q6ZM12 SCARS_HUMAN  | 1  | 40 | 76 | 33 | 0.078434 | 0.073818597  | 0.338054146  | -0.004615333 | 0.259620217  | 0.26423555   | 0.996745607 | 0.001290519 | 0.000182454 |
| sp P21757 MSRE_HUMAN   | 6  | 36 | 70 | 30 | -0.21243 | -0.092222846 | 0.468274661  | 0.12020725   | 0.680704756  | 0.560497507  | 0.513368814 | 2.33E-06    | 1.07E-05    |
| sp P50238 CRIP1_HUMAN  | 4  | 37 | 69 | 30 | -0.33527 | -0.117259064 | 0.36369664   | 0.218015742  | 0.698971446  | 0.480955704  | 0.035731606 | 1.99E-09    | 2.77E-06    |
| sp P08217 CEL2A_HUMAN  | 22 | 32 | 62 | 27 | -0.00298 | -0.006345959 | 0.156465579  | -0.003363438 | 0.1594481    | 0.162811538  | 0.999537813 | 0.489421734 | 0.38516639  |
| sp P61769 B2MG_HUMAN   | 3  | 40 | 76 | 33 | -0.1413  | -0.094636684 | 0.484946965  | 0.046662305  | 0.626245955  | 0.57958365   | 0.872500639 | 3.93E-07    | 1.23E-07    |
| sp Q9NZ53 PDXLC_HUMAN  | 1  | 8  | 14 | 5  | -0.02612 | 0.115828788  | 0.010711159  | 0.141946443  | 0.036828814  | -0.105117629 | 0.369747082 | 0.958593602 | 0.666521044 |
| sp Q00872 MYPC1_HUMAN  | 3  | 11 | 19 | 9  | -0.71091 | -0.856932509 | 0.238694321  | -0.146026795 | 0.949600035  | 1.09562683   | 0.937685842 | 0.160731444 | 0.054907314 |
| sp P07195 LDHB_HUMAN   | 1  | 40 | 76 | 33 | 0.077285 | 0.047021021  | 0.280201036  | -0.030264407 | 0.202915608  | 0.233180015  | 0.868744478 | 0.015215863 | 0.001056903 |
| sp Q15691 MAREL1_HUMAN | 7  | 40 | 76 | 33 | -0.12902 | -0.277771848 | 0.068094137  | -0.148748549 | 0.197117436  | 0.345865985  | 0.446811404 | 0.00339362  | 0.004453249 |
| sp P12110 CO6A2_HUMAN  | 10 | 40 | 76 | 33 | -0.03479 | -0.021198849 | 0.293710243  | 0.1359111    | 0.328500202  | 0.314909092  | 0.970115084 | 1.69E-05    | 3.18E-06    |
| sp P61158 ARP3_HUMAN   | 10 | 40 | 76 | 33 | -0.16197 | -0.218599064 | 0.137933558  | -0.056624822 | 0.299907799  | 0.356532622  | 0.889483199 | 0.108912997 | 0.01984827  |
| sp P05089 ARG1_HUMAN   | 3  | 29 | 56 | 25 | -0.38958 | -0.087021405 | 0.163262082  | 0.203555111  | 0.552838999  | 0.250283488  | 0.116642936 | 0.00765498  | 0.260790608 |
| sp Q96P02 DCBD2_HUMAN  | 6  | 40 | 76 | 33 | -0.02166 | -0.014235685 | 0.188815224  | 0.00742869   | 0.210479599  | 0.203050909  | 0.979324589 | 2.91E-05    | 5.14E-06    |
| sp P10321 HLAC_HUMAN   | 1  | 40 | 76 | 33 | -0.14716 | -0.017533823 | 0.085248092  | 0.129623883  | 0.232405798  | 0.102781915  | 0.351951029 | 0.101639094 | 0.560294668 |
| sp P17693 HLAG_HUMAN   | 9  | 36 | 69 | 30 | -0.1734  | 0.114994978  | 0.28839147   | 0.331204232  | 0.042812815  | 0.014047847  | 0.020114867 | 0.010214867 | 0.916662639 |
| sp Q9NS98 SEM3G_HUMAN  | 5  | 40 | 76 | 33 | 0.040029 | 0.002287706  | -0.05527108  | -0.037740875 | -0.095299661 | -0.057558786 | 0.553435584 | 0.078083144 | 0.31075819  |
| sp P15121 ALDR_HUMAN   | 4  | 40 | 76 | 33 | -0.02286 | -0.01534818  | 0.385392523  | 0.00750781   | 0.408235244  | 0.400727433  | 0.996151146 | 0.000670056 | 0.000145749 |
| sp Q99588 LGMN_HUMAN   | 2  | 36 | 69 | 30 | -0.1791  | -0.093305135 | 0.032609891  | 0.085795672  | 0.209370698  | 0.123575026  | 0.425456434 | 0.032687315 | 0.011334534 |
| sp Q16774 KGUA_HUMAN   | 21 | 4  | 7  | 3  | 0.198408 | 0.248641264  | 0.038798939  | 0.050233671  | -0.159608654 | -0.209842324 | 0.932173134 | 0.631275314 | 0.394273881 |
| sp Q95881 TXD12_HUMAN  | 2  | 18 | 35 | 14 | -0.29215 | -0.114381231 | 0.354825583  | 0.17768452   | 0.646975266  | 0.469206814  | 0.640085492 | 0.05241553  | 0.001638313 |
| sp P19883 FST_HUMAN    | 7  | 18 | 34 | 14 | 0.106521 | 0.068844881  | 0.245945702  | -0.037675947 | 0.319424874  | 0.357100822  | 0.9570214   | 0.131080703 | 0.043691577 |
| sp Q16775 GLO2_HUMAN   | 89 | 37 | 69 | 30 | -0.08396 | -0.050387976 | 0.168273805  | 0.033575955  | 0.252685366  | 0.219111781  | 0.894527404 | 0.017056469 | 0.019248164 |
| sp Q40967 PMEL_HUMAN   | 5  | 40 | 76 | 33 | 0.040215 | 0.032679788  | -0.258077827 | -0.007356021 | -0.298292657 | -0.290757636 | 0.992034051 | 0.000341051 | 7.37E-05    |
| sp P08138 TNFR1_HUMAN  | 3  | 28 | 55 | 24 | -0.20965 | -0.3027074   | 0.51063215   | -0.093056964 | 0.720282586  | 0.81333955   | 0.804667732 | 0.800277312 | 2.80E-06    |
| sp Q9NRV9 HEBP1_HUMAN  | 18 | 22 | 41 | 19 | -0.45032 | -0.109412515 | 0.247862065  | 0.340904357  | 0.878178937  | 0.53727458   | 0.112873168 | 9.78E-05    | 0.008927888 |
| sp P07910 HNRC_HUMAN   | 4  | 40 | 75 | 32 | -0.98933 | -0.586838085 | 0.246231869  | 0.402490012  | 1.235559966  | 0.833069955  | 0.096541044 | 1.37E-06    | 0.000294286 |
| sp Q43505 B4GA1_HUMAN  | 7  | 40 | 76 | 33 | 0.182003 | 0.149764317  | -0.004435588 | -0.032238345 | -0.186438251 | -0.154199905 | 0.46482784  | 2.05E-07    | 1.22E-06    |
| sp P04350 TB84A_HUMAN  | 3  | 40 | 76 | 33 | -0.28811 | -0.085002444 | 0.24397106   | 0.203104718  | 0.532078222  | 0.328973503  | 0.201801628 | 0.000769344 | 0.027020005 |
| sp P19105 ML12A_HUMAN  | 3  | 40 | 76 | 33 | -0.53211 | -0.175274517 | 0.327712707  | 0.356830647  | 0.859817871  | 0.502987224  | 0.002410817 | 6.56E-10    | 4.02E-05    |
| sp P10916 MLRV_HUMAN   | 2  | 7  | 13 | 6  | -0.96547 | -1.27577837  | -0.140130893 | -0.130131055 | 0.825336422  | 1.135647478  | 0.895375274 | 0.580565428 | 0.282540895 |
| sp Q02045 MYL5_HUMAN   | 1  | 4  | 6  | 2  | -0.38909 | -0.418351805 | 2.417389276  | -0.029264981 | 2.8064767    | 2.835741082  | 0.999464394 | 0.119376447 | 0.02552122  |
| sp Q96A32 MLRS_HUMAN   | 2  | 40 | 76 | 33 | -0.34127 | -0.484536014 | -0.397720874 | -0.143264267 | -0.056449128 | 0.086815139  | 0.145625425 | 0.810452826 | 0.532748119 |
| sp Q8NC51 PAIRB_HUMAN  | 5  | 11 | 20 | 9  | -0.04239 | -0.079127113 | 0.723601283  | -0.036737128 | 0.765991267  | 0.802728395  | 0.988639058 | 0.00360762  | 0.015094349 |
| sp P36222 CH3L1_HUMAN  | 8  | 40 | 76 | 33 | -0.17093 | -0.254403153 | 0.784653112  | -0.083474729 | 0.955581536  | 1.039056265  | 0.84676875  | 1.74E-06    | 5.61E-09    |
| sp Q96C86 DCP5_HUMAN   | 7  | 33 | 62 | 27 | -0.20252 | -0.012383461 | 0.324000936  | 0.214904958  | 0.522922433  | 0.308017475  | 0.075965551 | 6.05E-05    | 0.010881893 |
| sp P07988 PSPB_HUMAN   | 25 | 40 | 76 | 33 | -0.47014 | -0.319693324 | 1.125678494  | 0.150450673  | 1.595822491  | 1.445371819  | 0.538445244 | 3.92E-14    | 3.87E-14    |
| sp Q9P010 VAPA_HUMAN   | 22 | 32 | 63 | 28 | -0.14743 | -0.088737327 | 0.323365454  | 0.058689131  | 0.470791991  | 0.41210278   | 0.845331025 | 0.000887112 | 0.000918859 |
| sp Q75131 CPNE3_HUMAN  | 2  | 32 | 63 | 27 | -0.16274 | -0.032107967 | 0.421159082  | 0.136039008  | 0.583897147  | 0.453267049  | 0.521248895 | 0.000265955 | 0.001467471 |
| sp Q81283 AL16A1_HUMAN | 7  | 40 | 76 | 33 | -0.51388 | -0.025717117 | 0.378303426  | 0.488165804  | 0.892186347  | 0.404020542  | 2.12E-07    | 6.04E-14    | 6.04E-05    |
| sp Q15056 IF4H_HUMAN   | 1  | 14 | 28 | 12 | -0.24649 | -0.243835957 | 0.13977001   | 0.002657522  | 0.386263489  | 0.383605967  | 0.999941426 | 0.431732819 | 0.342617177 |
| sp Q96P70 IPO9_HUMAN   | 2  | 22 | 41 | 18 | 0.287471 | 0.284573063  | 0.39187543   | 0.002898113  | 0.104404254  | 0.107302367  | 0.999527024 | 0.056021986 | 0.570462865 |
| sp Q8WXD2 SCG3_HUMAN   | 3  | 40 | 76 | 33 | 0.002514 | -0.110773688 | -0.132451976 | -0.113287424 | -0.134965713 | -0.021678288 | 0.033083008 | 0.053419945 | 0.892779025 |
| sp Q9NSC7 SIA7A_HUMAN  | 56 | 40 | 76 | 33 | -0.02484 | -0.07628798  | -0.088990172 | -0.05144706  | -0.064149252 | -0.012702192 | 0.745610752 | 0.729909169 | 0.984365618 |
| sp Q9HBR0 S38AA_HUMAN  | 5  | 40 | 76 | 33 | 0.116567 | 0.125271117  | 0.277118233  | 0.00870449   | 0.160551607  | 0.151847117  | 0.985156955 | 0.102149495 | 0.000914945 |
| sp E9PVA3 NACAM_HUMAN  | 13 | 11 | 21 | 10 | -0.1475  | -0.236885983 | 0.449053046  | -0.08938958  | 0.596549449  | 0.685939028  | 0.900042174 | 0.044013123 | 0.00651159  |
| sp Q10173 ROR1_HUMAN   | 12 | 40 | 76 | 33 | 0.073323 | -0.059976579 | 0.088424742  | -0.133299585 | 0.015107366  | 0.148401321  | 0.025995885 | 0.019695333 | 0.019075546 |
| sp P18850 ATF6A_HUMAN  | 1  | 40 | 76 | 33 | 0.094232 | 0.056048176  | -0.05072649  | -0.038183401 | -0.144958067 | -0.106774666 | 0.559376229 | 0.00410819  | 0.021160094 |
| sp P27105 STOM_HUMAN   | 2  | 40 | 76 | 33 | -1.91668 | -1.578343645 | -0.116753805 | 0.338334633  | 0.799924473  | 0.46158984   | 0.057241227 | 3.45E-05    | 0.01114789  |
| sp Q9BY28 REG4_HUMAN   | 3  | 33 | 63 | 27 | -0.00254 | -0.054221327 | 0.057423138  | -0.051679585 | 0.059964888  | 0.111644465  | 0.594639507 | 0.618712714 | 0.125187083 |
| sp Q13308 PTK7_HUMAN   | 5  | 40 | 76 | 33 | -0.23527 | -0.209301045 | 0.10816068   | 0.025        |              |              |             |             |             |

|                       |     |    |    |    |          |               |              |              |              |              |             |             |             |
|-----------------------|-----|----|----|----|----------|---------------|--------------|--------------|--------------|--------------|-------------|-------------|-------------|
| sp O15212 PFD6_HUMAN  | 7   | 15 | 27 | 11 | -0.06699 | 0.03833721    | 0.236498748  | 0.105329934  | 0.303491473  | 0.198161539  | 0.68570348  | 0.137488222 | 0.344791021 |
| sp O9Y315 DEOC_HUMAN  | 5   | 20 | 42 | 19 | -0.12485 | -0.04611837   | 0.289204707  | 0.078726721  | 0.414049797  | 0.335323076  | 0.6320913   | 0.000310634 | 0.000793994 |
| sp P54687 BCAT1_HUMAN | 2   | 4  | 7  | 2  | -0.2772  | 0.264306469   | 0.26273122   | 0.5414996    | 0.53992717   | -0.001572429 | 0.710250746 | 0.058524402 | 0.999981722 |
| sp P45974 UBP5_HUMAN  | 1   | 40 | 76 | 33 | -0.33605 | -0.18681597   | 0.146963602  | 0.149235087  | 0.483014659  | 0.333779572  | 0.237738684 | 6.8E-05     | 0.002418295 |
| sp Q13797 IT9A_HUMAN  | 5   | 40 | 76 | 33 | 0.136166 | 0.132441362   | 0.13444231   | -0.003723447 | -0.001723479 | 0.002000868  | 0.998380862 | 0.999760593 | 0.999598442 |
| sp G06240 PLIN1_HUMAN | 2   | 22 | 42 | 17 | 0.042589 | 0.228680289   | 0.273357289  | 0.186091392  | 0.230768393  | 0.044677     | 0.333308609 | 0.325686965 | 0.947420162 |
| sp P21980 TGM2_HUMAN  | 39  | 29 | 56 | 24 | -0.45219 | -0.130048732  | 0.119388233  | 0.322142091  | 0.571579056  | 0.249436964  | 0.028649961 | 0.0006518   | 0.147674285 |
| sp P27930 IL1R2_HUMAN | 36  | 40 | 76 | 33 | 0.060974 | 0.051165983   | 0.073007567  | -0.009808178 | 0.012033406  | 0.021841585  | 0.989715084 | 0.989320563 | 0.050607721 |
| sp Q8NB4 GOLM1_HUMAN  | 17  | 40 | 76 | 33 | -0.15074 | 0.019491801   | 0.493037598  | -0.160658391 | 0.643777977  | 0.478119587  | 0.239954827 | 1.70E-06    | 6.54E-05    |
| sp P09497 CLCB_HUMAN  | 1   | 12 | 20 | 9  | 0.228592 | 0.099497171   | 0.472928255  | -0.2929524   | 0.244335845  | 0.373431085  | 0.790182677 | 0.564068353 | 0.208790904 |
| sp Q13287 NMI_HUMAN   | 62  | 14 | 28 | 11 | 0.044521 | 0.196193332   | 0.364301984  | 0.151672292  | 0.319780944  | 0.168108653  | 0.520057385 | 0.155083726 | 0.507013298 |
| sp Q9H0U4 RAB18_HUMAN | 14  | 40 | 76 | 33 | -0.2034  | -0.211262644  | 0.330147985  | -0.007866449 | 0.53354418   | 0.541410629  | 0.997503996 | 0.000632995 | 7.76E-05    |
| sp Q9H173 SIL1_HUMAN  | 6   | 40 | 76 | 33 | -0.40544 | -0.34347171   | 0.163651291  | 0.061968537  | 0.569091538  | 0.507123001  | 0.827289975 | 4.47E-05    | 4.06E-05    |
| sp Q96FW1 OTUB1_HUMAN | 12  | 40 | 76 | 33 | -0.23508 | -0.179648592  | 0.10190368   | 0.055435916  | 0.22489414   | 0.169458224  | 0.826146351 | 0.119432287 | 0.213407208 |
| sp Q9Y2T3 GUAD_HUMAN  | 6   | 40 | 76 | 33 | 0.00446  | 0.043389193   | 0.196049296  | 0.038928879  | 0.191588983  | 0.152661004  | 0.84349237  | 0.062779302 | 0.105570983 |
| sp P12882 MYH1_HUMAN  | 16  | 26 | 48 | 22 | -0.00323 | -0.025159004  | 0.029251988  | -0.02193098  | 0.028647922  | 0.050578902  | 0.987132463 | 0.984506713 | 0.940282905 |
| sp Q8N1Q1 CAH13_HUMAN | 19  | 36 | 69 | 31 | -0.07284 | -0.169053384  | 0.084119058  | -0.096209658 | 0.156962785  | 0.253172443  | 0.780313021 | 0.628925254 | 0.216351567 |
| sp A6NMZ7 CO6A6_HUMAN | 80  | 15 | 28 | 13 | 0.176156 | 0.123527063   | 0.252718359  | -0.052628462 | 0.076562834  | 0.129191296  | 0.921612842 | 0.884207402 | 0.614828317 |
| sp P38571 LICH_HUMAN  | 5   | 36 | 69 | 30 | -0.04576 | 0.031391707   | 0.297574318  | 0.077153876  | 0.343336488  | 0.266182611  | 0.497825079 | 0.000155561 | 0.001043274 |
| sp P58546 MTPN_HUMAN  | 10  | 40 | 76 | 33 | -0.20172 | -0.068257301  | 0.134046504  | 0.133459433  | 0.332181774  | 0.198722342  | 0.507223544 | 0.085899352 | 0.269131276 |
| sp G06056 HNRPO_HUMAN | 113 | 30 | 55 | 24 | -0.25623 | -0.252453972  | 0.240241591  | 0.003773531  | 0.496469095  | 0.492695563  | 0.999458059 | 0.002551562 | 0.000706624 |
| sp Q9BZ08 NIBA1_HUMAN | 22  | 14 | 28 | 11 | -0.32157 | -0.187242569  | 0.151883883  | 0.134327624  | 0.473454076  | 0.339126452  | 0.695444002 | 0.060205658 | 0.151228852 |
| sp P11215 ITAM_HUMAN  | 3   | 14 | 28 | 13 | 0.00194  | -0.089575649  | 0.178807924  | -0.091515591 | 0.476867972  | 0.568383573  | 0.779551627 | 0.01182027  | 0.000445721 |
| sp Q9NZU9 MAT2B_HUMAN | 2   | 37 | 69 | 30 | -0.08915 | 0.139694605   | 0.432072963  | 0.228844794  | 0.521223151  | 0.292378358  | 0.029282793 | 9.08E-06    | 0.007230343 |
| sp P11940 PABP1_HUMAN | 9   | 26 | 49 | 20 | 0.117483 | 0.122978417   | 0.34773759   | 0.005495079  | 0.230254251  | 0.224759173  | 0.997329779 | 0.050208556 | 0.028639369 |
| sp P16885 PLCG2_HUMAN | 4   | 7  | 14 | 6  | -0.56219 | -0.466608725  | 0.672622371  | 0.09558466   | 1.234815756  | 1.139231096  | 0.959171325 | 0.101896128 | 0.013349851 |
| sp O00506 STK25_HUMAN | 9   | 10 | 21 | 9  | -0.07104 | -0.027220683  | 0.176880196  | 0.043818885  | 0.787919764  | 0.744100879  | 0.986181209 | 0.056172001 | 0.034570397 |
| sp P17655 CAN2_HUMAN  | 4   | 40 | 76 | 33 | -0.14048 | -0.008432287  | 0.197718374  | 0.132044122  | 0.337694783  | 0.205650661  | 0.015999723 | 5.87E-08    | 0.000214288 |
| sp Q8NHU6 LURB1_HUMAN | 15  | 40 | 76 | 33 | 0.06448  | 0.015449345   | 0.097548003  | -0.049038001 | 0.033067857  | 0.082098658  | 0.697364208 | 0.892773464 | 0.714399287 |
| sp G6P173 LURA6_HUMAN | 1   | 40 | 76 | 33 | -0.21016 | -0.012801267  | 0.070622828  | 0.197360437  | 0.280784531  | 0.083424095  | 0.020516847 | 0.004749746 | 0.532301756 |
| sp Q16822 CKGM_HUMAN  | 1   | 40 | 76 | 33 | -0.28061 | 0.03003968    | 0.086559509  | 0.31560959   | 0.36716513   | 0.05155554   | 0.008215445 | 0.011175725 | 0.88864976  |
| sp Q9HCN6 GPVI_HUMAN  | 5   | 40 | 76 | 33 | -0.20616 | 0.013315994   | 0.162575343  | 0.219477351  | 0.3687367    | 0.149259349  | 0.027704752 | 0.001148342 | 0.2258375   |
| sp Q14914 PTGR1_HUMAN | 5   | 40 | 76 | 33 | -0.25433 | -0.104683861  | -0.046007175 | 0.149643804  | 0.208320489  | 0.058676686  | 0.218651167 | 0.132358237 | 0.812133199 |
| sp P18827 SDCI1_HUMAN | 2   | 29 | 55 | 24 | -0.77524 | -0.617425243  | 0.328042011  | 0.157816571  | 1.103283826  | 0.945467255  | 0.664038669 | 6.25E-06    | 1.25E-06    |
| sp G6PCE3 PGM2L_HUMAN | 5   | 7  | 14 | 6  | -0.53203 | -0.260304991  | 0.33223047   | 0.271723666  | 0.864251705  | 0.592528039  | 0.544622025 | 0.024927755 | 0.0911423   |
| sp P36551 HEM6_HUMAN  | 1   | 37 | 68 | 30 | -0.15748 | -0.072625518  | 0.108060492  | 0.084859069  | 0.263291079  | 0.17843201   | 0.483616959 | 0.009373353 | 0.065308766 |
| sp P20827 EFNA1_HUMAN | 1   | 40 | 76 | 33 | -0.46422 | -0.35973953   | 0.039431798  | 0.104482685  | 0.553537013  | 0.449054328  | 0.528376376 | 1.43E-05    | 7.61E-05    |
| sp P62987 RL40_HUMAN  | 7   | 40 | 76 | 33 | -0.37093 | -0.180121859  | 0.389445315  | 0.190810642  | 0.710377817  | 0.519567175  | 0.188625499 | 6.97E-07    | 4.48E-05    |
| sp Q9NY33 DPP3_HUMAN  | 2   | 40 | 76 | 33 | -0.13073 | -0.106054348  | 0.246793573  | 0.024680406  | 0.377528327  | 0.352847921  | 0.939157503 | 9.60E-05    | 3.73E-05    |
| sp Q9H4D0 CSTN2_HUMAN | 29  | 14 | 27 | 12 | 0.164509 | 0.077606954   | 0.388671145  | -0.086902058 | 0.224162133  | 0.311064191  | 0.764247141 | 0.293612078 | 0.054191639 |
| sp Q58F60 HS905_HUMAN | 2   | 40 | 76 | 33 | -0.34698 | -0.255075604  | 0.259979437  | 0.091902635  | 0.606957675  | 0.515055041  | 0.760011966 | 0.000467363 | 0.000580349 |
| sp Q29983 MICA_HUMAN  | 6   | 16 | 27 | 12 | -0.02831 | -0.013195373  | 0.294741956  | 0.015113397  | 0.323050726  | 0.30793733   | 0.992235194 | 0.999691846 | 0.080021791 |
| sp P11117 PPAL_HUMAN  | 212 | 21 | 42 | 18 | 0.095352 | 0.017774304   | 0.115192991  | -0.077577883 | 0.019840804  | 0.097418687  | 0.556266811 | 0.973547608 | 0.436469374 |
| sp Q9UKZ9 PCOC2_HUMAN | 11  | 40 | 76 | 33 | 0.14236  | 0.112247693   | -0.067271069 | -0.030111843 | -0.209630604 | -0.179518762 | 0.714518584 | 3.71E-05    | 6.94E-05    |
| sp P05204 HMGN2_HUMAN | 8   | 36 | 69 | 30 | -1.13318 | -0.874484969  | 0.23830951   | 0.258696238  | 1.371490717  | 1.112794478  | 0.43007925  | 6.19E-07    | 4.74E-06    |
| sp Q13AX3 TKFC_HUMAN  | 2   | 40 | 76 | 33 | -0.15621 | 0.005442955   | 0.207736946  | 0.161652136  | 0.363946487  | 0.202294351  | 0.135871688 | 0.001276245 | 0.06561461  |
| sp Q99497 PARK7_HUMAN | 8   | 40 | 76 | 33 | -0.10487 | -0.040654802  | 0.329448998  | 0.064218542  | 0.434323243  | 0.37013038   | 0.724127228 | 8.96E-05    | 0.000172728 |
| sp P08476 INHBA_HUMAN | 3   | 30 | 55 | 23 | -0.09003 | 0.006718777   | 0.186828205  | 0.096753087  | 0.276862516  | 0.180109428  | 0.501575848 | 0.02693062  | 0.140242773 |
| sp P36269 GGT5_HUMAN  | 3   | 40 | 76 | 33 | 0.248686 | 0.197747369   | 0.119067763  | 0.0350938795 | -0.129618401 | -0.078679606 | 0.434568906 | 0.026816475 | 0.177309409 |
| sp O15372 EIF3H_HUMAN | 1   | 4  | 7  | 3  | -0.72543 | -0.424642871  | 0.407629848  | 0.300791489  | 1.133064208  | 0.832272719  | 0.83516151  | 0.220314703 | 0.351182789 |
| sp Q13443 ADAM9_HUMAN | 31  | 36 | 69 | 30 | -0.21437 | -0.072437413  | 0.247630683  | 0.141932469  | 0.462000566  | 0.320068097  | 0.133948561 | 1.95E-06    | 0.000215379 |
| sp P01589 IL2RA_HUMAN | 4   | 4  | 7  | 2  | 0.047202 | 0.603220202   | 0.00093951   | 0.556017977  | -0.046262712 | -0.602280692 | 0.711781608 | 0.998723322 | 0.781766729 |
| sp Q14112 NID2_HUMAN  | 1   | 40 | 76 | 33 | -0.14025 | -0.006054395  | 0.147044232  | 0.134196711  | 0.287295338  | 0.153098626  | 0.064932563 | 0.000275286 | 0.044828295 |
| sp P17900 SAP3_HUMAN  | 10  | 40 | 76 | 33 | -0.03985 | -0.029225198  | 0.540912108  | 0.010629433  | 0.580766738  | 0.570137306  | 0.992242723 | 8.17E-07    | 5.12E-08    |
| sp Q16143 SYUB_HUMAN  | 1   | 40 | 76 | 33 | -0.16094 | -0.194672933  | 0.257595297  | -0.033736974 | 0.418531256  | 0.45226823   | 0.958325595 | 0.0134135   | 0.001831903 |
| sp P16152 CBR1_HUMAN  | 17  | 40 | 76 | 33 | -0.16649 | -0.006089472  | 0.30163986   | 0.160397215  | 0.468126547  | 0.307729332  | 0.137537775 | 2.21E-05    | 0.002134637 |
| sp Q9H0P0 SNT3A_HUMAN | 3   | 26 | 48 | 20 | -0.01183 | -0.021736644  | 0.078940508  | -0.009902196 | 0.090774956  | 0.100677152  | 0.995816478 | 0.790340703 | 0.697083575 |
| sp Q13361 MFAP5_HUMAN | 10  | 40 | 76 | 33 | 0.061832 | 0.014185004   | 0.259995948  | -0.076016771 | 0.198164218  | 0.274180989  | 0.306852009 | 0.00493265  | 5.32E-06    |
| sp P34390 NAMPT_HUMAN | 1   | 40 | 76 | 33 | -0.27993 | -0.128119909  | 0.264683327  | 0.15180954   | 0.544612776  | 0.392803236  | 0.293802553 | 4.61E-05    | 0.00110764  |
| sp P13521 SCG2_HUMAN  | 3   | 29 | 55 | 25 | 0.29165  | 0.286154492   | 0.237394042  | -0.005495587 | -0.054256038 | -0.048760451 | 0.997718585 | 0.854631175 | 0.850092698 |
| sp P15170 ERF3A_HUMAN | 38  | 29 | 56 | 24 | -0.41856 | -0.295217729  | 0.248516933  | 0.123340411  | 0.667075073  | 0.543734662  | 0.72864694  | 0.002672764 | 0.006170037 |
| sp Q92187 SIA8B_HUMAN | 7   | 40 | 76 | 33 | -0.01779 | 0.019952169   | 0.011954198  | 0.037746737  | 0.029748399  | -0.007997971 | 0.715377032 | 0.866027912 | 0.986838941 |
| sp Q15843 NEDD8_HUMAN | 27  | 8  | 14 | 6  | 0.110791 | -0.007754823  | 0.355697638  | -0.118046219 | 0.244906242  | 0.362952461  | 0.620453883 | 0.263872917 | 0.037372726 |
| sp Q15257 PTPA_HUMAN  | 2   | 40 | 76 | 33 | -0.12014 | -0.087742218  | 0.311412058  | 0.032394919  | 0.431548394  | 0.399154275  | 0.911846038 | 3.62E-05    | 1.59E-05    |
| sp P55263 ADK_HUMAN   | 2   | 37 | 69 | 30 | -0.2524  | -0.107955162  | 0.180984753  | 0.144445062  | 0.433384977  | 0.288939915  | 0.207129656 | 0.000211252 | 0.00521517  |
| sp Q99983 OMD_HUMAN   | 3   | 40 | 76 | 33 | 0.122497 | 0.054527186</ |              |              |              |              |             |             |             |

|                       |     |    |    |    |          |              |              |              |              |              |             |             |             |
|-----------------------|-----|----|----|----|----------|--------------|--------------|--------------|--------------|--------------|-------------|-------------|-------------|
| sp Q867Y3 ARMD4_HUMAN | 19  | 40 | 76 | 33 | 0.124548 | -0.005767869 | -0.198542523 | -0.130316146 | -0.3230908   | -0.192774654 | 0.037870584 | 3.03E-06    | 0.002209315 |
| sp Q9NR34 MA1C1_HUMAN | 14  | 40 | 76 | 33 | -0.01629 | -0.001690063 | 0.196540649  | 0.146000104  | 0.212830816  | 0.198230712  | 0.937149872 | 0.000161609 | 7.02E-05    |
| sp P13686 PPA5_HUMAN  | 253 | 40 | 76 | 33 | -0.09247 | -0.024840512 | 0.223040994  | 0.067621642  | 0.315507648  | 0.247881505  | 0.499679033 | 7.12E-05    | 0.000482996 |
| sp Q9NQ30 ESM1_HUMAN  | 6   | 4  | 7  | 3  | 0.190104 | -0.007502533 | 0.181154736  | -0.197156425 | -0.008949156 | 0.188207269  | 0.458967925 | 0.998836184 | 0.551051049 |
| sp Q86G55 S1A7A_HUMAN | 8   | 40 | 76 | 33 | -1.77038 | -0.891162406 | -0.177428167 | -0.120882038 | -0.407047799 | -0.286165761 | 0.886307718 | 0.392165383 | 0.553844882 |
| sp P22304 IDS_HUMAN   | 16  | 40 | 76 | 33 | 0.293056 | 0.202264556  | 0.113690652  | -0.090791858 | -0.179365762 | -0.088573904 | 0.137303143 | 0.005642401 | 0.189246175 |
| sp Q92598 HS105_HUMAN | 1   | 25 | 48 | 20 | -0.35481 | -0.045961505 | 0.425614652  | 0.308843515  | 0.780419672  | 0.471576157  | 0.100799944 | 0.000122016 | 0.013634551 |
| sp P16989 YBOX3_HUMAN | 13  | 4  | 6  | 3  | 0.155497 | 0.145127887  | 0.25182739   | -0.01036951  | 0.669685342  | 0.680054852  | 0.99972131  | 0.464885534 | 0.403449686 |
| sp P63208 SKP1_HUMAN  | 3   | 40 | 76 | 33 | -0.38232 | -0.169453745 | 0.517504935  | 0.122864618  | 0.899823298  | 0.686958681  | 0.163299288 | 5.19E-09    | 4.20E-07    |
| sp P52799 EFNB2_HUMAN | 13  | 40 | 76 | 33 | -0.11429 | -0.122487046 | 0.226896706  | -0.008197786 | 0.341185967  | 0.349383753  | 0.993535211 | 0.000740578 | 8.09E-05    |
| sp Q00410 IP05_HUMAN  | 4   | 28 | 56 | 24 | -0.39668 | -0.297189211 | 0.350088885  | 0.099495023  | 0.746773119  | 0.647278096  | 0.818910628 | 0.000799526 | 0.000932013 |
| sp P17174 AATC_HUMAN  | 11  | 40 | 76 | 33 | -0.04939 | -0.021906125 | 0.169724646  | 0.036479355  | 0.219110125  | 0.18263077   | 0.888458142 | 0.057232304 | 0.097078162 |
| sp Q8WY91 THAP4_HUMAN | 49  | 4  | 6  | 3  | -0.34236 | -0.273675816 | 0.535740797  | 0.068679695  | 0.878096308  | 0.809416613  | 0.987613224 | 0.279947032 | 0.282689163 |
| sp P55000 SLUR1_HUMAN | 4   | 30 | 55 | 25 | 0.206895 | 0.105836861  | 0.18323552   | -0.101057811 | -0.023671121 | 0.077386691  | 0.406151031 | 0.965484299 | 0.624707067 |
| sp P07451 CAH3_HUMAN  | 3   | 40 | 76 | 33 | -1.24722 | -1.204989977 | -0.634785177 | 0.04222852   | 0.61243332   | 0.5702048    | 0.933862384 | 0.000113911 | 4.83E-05    |
| sp P20036 DPA1_HUMAN  | 3   | 40 | 76 | 33 | -0.09792 | -0.206275714 | -0.204285752 | -0.108356753 | 0.001989962  | 0.441690625  | 0.57918973  | 0.999755942 | 0.999755942 |
| sp Q8W1W1 SFPA2_HUMAN | 226 | 40 | 76 | 33 | -0.12242 | -0.059404939 | 0.301442432  | 0.063012338  | 0.423859709  | 0.360847371  | 0.525892431 | 3.42E-08    | 1.11E-07    |
| sp Q01433 AMPD2_HUMAN | 1   | 7  | 14 | 6  | -0.08752 | 0.104942843  | 0.821032153  | 0.192466651  | 0.908555961  | 0.71608931   | 0.774154199 | 0.058852944 | 0.058852944 |
| sp P58400 NRX1B_HUMAN | 16  | 29 | 56 | 24 | 0.264152 | 0.207784677  | 0.501786643  | -0.05636764  | -0.212365675 | -0.155998034 | 0.699196651 | 0.034823498 | 0.095571925 |
| sp Q9Y212 E4I13_HUMAN | 16  | 10 | 21 | 9  | 0.031057 | -0.132578386 | 0.057575799  | -0.163658007 | 0.026698378  | 0.190334184  | 0.436267798 | 0.98428963  | 0.354510782 |
| sp P02763 A1AG1_HUMAN | 1   | 40 | 76 | 33 | -0.98163 | -0.875308321 | -0.200417449 | 0.106323157  | 0.78121403   | 0.674890873  | 0.826567211 | 0.021299057 | 0.001780612 |
| sp Q9NR91 PDGFC_HUMAN | 5   | 40 | 76 | 33 | -0.00253 | 0.034922339  | 0.154930686  | 0.037451819  | 0.157460167  | 0.120008348  | 0.658485149 | 0.007686183 | 0.026182636 |
| sp Q00231 PSD11_HUMAN | 14  | 22 | 42 | 18 | -0.20446 | -0.10288312  | 0.208829449  | 0.101576574  | 0.413289143  | 0.311712568  | 0.741095053 | 0.039071497 | 0.092031012 |
| sp P08779 K1C16_HUMAN | 2   | 17 | 35 | 16 | 0.055556 | 0.019821135  | -0.08210174  | -0.035734496 | -0.137657371 | -0.101922875 | 0.988745438 | 0.886269389 | 0.915515309 |
| sp Q9UKK9 NUDT5_HUMAN | 10  | 40 | 76 | 33 | -0.07552 | -0.038357631 | 0.33326706   | 0.03716682   | 0.408851157  | 0.371684337  | 0.882372001 | 7.33E-05    | 4.67E-05    |
| sp Q9U649 MSRA_HUMAN  | 38  | 32 | 63 | 27 | 0.038727 | 0.024294817  | 0.271793038  | -0.014432637 | 0.233065584  | 0.247498221  | 0.988287201 | 0.126432932 | 0.050913403 |
| sp Q05209 PTN12_HUMAN | 1   | 29 | 55 | 24 | -0.04877 | -0.03083437  | 0.264912067  | 0.079605533  | 0.313683188  | 0.234077697  | 0.885943667 | 0.401792763 | 0.401792763 |
| sp Q9BRT3 MIEN1_HUMAN | 4   | 25 | 48 | 21 | -0.26966 | -0.310532607 | 0.376324174  | -0.040874436 | 0.645982346  | 0.686856782  | 0.966802591 | 0.003971509 | 0.000470704 |
| sp Q93074 MED12_HUMAN | 4   | 4  | 6  | 3  | 0.030767 | -0.251086183 | 0.223481135  | -0.281853559 | 0.192713758  | 0.474567318  | 0.424149315 | 0.07077853  | 0.161135094 |
| sp Q14618 CCS_HUMAN   | 5   | 34 | 62 | 26 | -0.20127 | -0.025498045 | 0.284961105  | 0.17577583   | 0.48623498   | 0.31045915   | 0.305821141 | 0.003131861 | 0.048966346 |
| sp Q8WFF4 MDGA1_HUMAN | 3   | 22 | 42 | 18 | 0.134589 | 0.07183909   | -0.085002327 | -0.062749731 | -0.219591147 | -0.156841416 | 0.433145214 | 0.001671777 | 0.01339044  |
| sp P05451 REG1A_HUMAN | 1   | 40 | 76 | 33 | -0.2005  | -0.145045922 | 0.246134396  | 0.055485804  | 0.446638821  | 0.391180317  | 0.913124411 | 0.002056649 | 0.021945672 |
| sp Q13510 ASAH1_HUMAN | 22  | 40 | 76 | 33 | -0.08155 | -0.029691619 | 0.159318742  | -0.011146514 | 0.240863846  | 0.25201036   | 0.974499638 | 0.000450852 | 2.86E-05    |
| sp Q9UJCS SH3L2_HUMAN | 3   | 40 | 76 | 33 | -0.22248 | -0.25159108  | -0.206354313 | -0.029106604 | 0.016130074  | 0.045236767  | 0.981131364 | 0.995697185 | 0.960378843 |
| sp Q99972 MYOC_HUMAN  | 6   | 40 | 76 | 33 | 0.105383 | 0.097102472  | -0.007268605 | -0.008280929 | -0.112652005 | -0.104371077 | 0.989271157 | 0.25723906  | 0.227368199 |
| sp Q9BXD5 NPL_HUMAN   | 12  | 32 | 62 | 27 | -0.27801 | -0.177642435 | 0.323754667  | 0.100363146  | 0.601760248  | 0.501397102  | 0.632812057 | 3.69E-05    | 0.000100875 |
| sp Q75695 XRP2_HUMAN  | 29  | 14 | 27 | 12 | -0.05946 | -0.093580327 | 0.30396568   | -0.034117018 | 0.362859877  | 0.396976895  | 0.951283567 | 0.026334781 | 0.004635003 |
| sp Q06036 TSN2_HUMAN  | 4   | 14 | 28 | 13 | -0.0044  | -0.156276047 | 0.287132203  | -0.151875976 | 0.291532274  | 0.44340825   | 0.450528707 | 0.127314214 | 0.031080304 |
| sp P61758 PFD3_HUMAN  | 6   | 22 | 42 | 18 | -0.35171 | -0.098990016 | 0.341323039  | 0.201824953  | 0.694847278  | 0.443022326  | 0.56593135  | 0.057089101 | 0.220022385 |
| sp P30040 ERP29_HUMAN | 1   | 40 | 76 | 33 | -0.11821 | -0.100145883 | 0.165006203  | 0.95865733   | 0.283217819  | 0.265152086  | 0.983683238 | 0.065920764 | 0.04863192  |
| sp Q8N257 H2B3B_HUMAN | 5   | 40 | 76 | 33 | -0.44526 | -0.400679674 | 0.24314063   | 0.044579686  | 0.68839999   | 0.643820304  | 0.961266093 | 0.0022208   | 0.001161375 |
| sp P62807 H2B1C_HUMAN | 12  | 25 | 48 | 21 | -0.653   | -0.548596655 | 0.330371625  | 0.104400963  | 0.983369243  | 0.87896828   | 0.903958698 | 0.003228626 | 0.002863285 |
| sp Q15631 TSN_HUMAN   | 34  | 40 | 76 | 33 | -0.31428 | -0.137594122 | 0.292287266  | 0.176685897  | 0.606567285  | 0.429881388  | 0.126999504 | 3.44E-07    | 4.84E-05    |
| sp Q060234 GMFG_HUMAN | 18  | 40 | 76 | 33 | -0.33829 | -0.181359876 | 0.198924791  | 0.156933765  | 0.537218432  | 0.380284667  | 0.444635269 | 0.002018318 | 0.017566721 |
| sp Q95433 AHSA1_HUMAN | 12  | 8  | 13 | 6  | -0.11479 | 0.016461502  | 0.234433064  | 0.131251119  | 0.409222682  | 0.277971562  | 0.786290772 | 0.217534907 | 0.419558388 |
| sp P17612 KAPCA_HUMAN | 14  | 11 | 21 | 9  | 0.023313 | -0.179147898 | 0.568421404  | -0.202460967 | 0.545108335  | 0.747569303  | 0.669130066 | 0.148334114 | 0.014169793 |
| sp P22223 CADH3_HUMAN | 1   | 28 | 55 | 24 | -0.10201 | -0.181275105 | 0.097835515  | -0.079261133 | 0.199843487  | 0.27911062   | 0.374951116 | 0.374951116 | 0.374951116 |
| sp Q14745 NHRF1_HUMAN | 8   | 40 | 76 | 33 | -0.11085 | -0.175088326 | 0.143720006  | -0.064235637 | 0.254572695  | 0.318808332  | 0.771922721 | 0.064983491 | 0.00491175  |
| sp P50897 PPT1_HUMAN  | 5   | 29 | 55 | 24 | 0.065309 | 0.077763118  | 0.151085651  | 0.021453787  | 0.085776319  | 0.073322533  | 0.981892225 | 0.551604354 | 0.574979592 |
| sp Q8WZ40 LZIC_HUMAN  | 2   | 36 | 69 | 30 | -0.11691 | -0.039380231 | 0.243776107  | 0.07753039   | 0.360686728  | 0.283156338  | 0.660920275 | 0.002899382 | 0.009473699 |
| sp Q15323 K1H1_HUMAN  | 9   | 8  | 13 | 6  | -0.20276 | -0.412831452 | -0.197189786 | 0.615595952  | 0.005574713  | -0.610021238 | 0.375461831 | 0.999941831 | 0.44760636  |
| sp P60983 GMFB_HUMAN  | 97  | 36 | 69 | 30 | -0.05131 | 0.098933408  | 0.412989298  | 0.150240831  | 0.464296721  | 0.31405589   | 0.407053435 | 0.003556099 | 0.03414404  |
| sp Q8T046 MQ2R1_HUMAN | 20  | 16 | 27 | 12 | -0.318   | -0.173887882 | 0.099269688  | 0.144109747  | 0.417267317  | 0.27315757   | 0.673946836 | 0.114427192 | 0.315985701 |
| sp Q9NQ27 ENTP7_HUMAN | 80  | 19 | 34 | 14 | 0.041955 | 0.154485455  | 0.330671269  | 0.112530846  | 0.28871666   | 0.176185814  | 0.666204968 | 0.178436878 | 0.447630605 |
| sp P50135 HNMT_HUMAN  | 12  | 4  | 7  | 3  | -0.38845 | -0.066150653 | 0.188912636  | 0.322296821  | 0.199534839  | -0.122767192 | 0.09553984  | 0.490677924 | 0.716092646 |
| sp Q9Y2Q3 GSK1_HUMAN  | 7   | 28 | 55 | 24 | -0.10035 | -0.299535639 | 0.271397876  | -0.199188031 | 0.371745483  | 0.570933514  | 0.4008797   | 0.112961596 | 0.001819114 |
| sp Q9Y252 CRY1_HUMAN  | 32  | 31 | 55 | 23 | -0.27115 | -0.014369648 | 0.202324578  | 0.256782261  | 0.473476487  | 0.216694227  | 0.048826522 | 0.001407157 | 0.166331959 |
| sp P54317 LUPR2_HUMAN | 44  | 15 | 28 | 11 | -0.04866 | 0.02014941   | 0.001689584  | 0.068813569  | 0.050353722  | -0.018459824 | 0.834772001 | 0.989891431 | 0.989502566 |
| sp Q9BVA1 TB82B_HUMAN | 11  | 40 | 76 | 33 | -0.39174 | -0.097067531 | 0.221001242  | 0.294676987  | 0.612745259  | 0.318068772  | 0.045679223 | 0.00016638  | 0.042655075 |
| sp P31150 GDI4_HUMAN  | 15  | 40 | 76 | 33 | 0.026653 | -0.047156709 | 0.180585831  | -0.073809211 | 0.15393325   | 0.227742541  | 0.63730011  | 0.262013185 | 0.026169762 |
| sp Q64103 METR1_HUMAN | 25  | 40 | 76 | 33 | -0.00706 | 0.020886869  | 0.131194921  | 0.027948923  | 0.138256975  | 0.110308052  | 0.996491494 | 0.026163879 | 0.051234194 |
| sp P17987 TCPA_HUMAN  | 24  | 37 | 69 | 29 | -0.18748 | -0.112032053 | 0.187165958  | 0.075450407  | 0.474648481  | 0.399198011  | 0.715211986 | 0.000267037 | 0.000627841 |
| sp P15090 FABP4_HUMAN | 1   | 40 | 76 | 33 | -0.35404 | -0.309634966 | 0.263891402  | 0.044403378  | 0.617929386  | 0.573526008  | 0.910720554 | 2.88E-05    | 1.16E-05    |
| sp P31997 CEAM8_HUMAN | 2   | 32 | 62 | 27 | 0.092119 | 0.230126794  | 0.308698112  | 0.138008118  | 0.216579435  | 0.07851317   | 0.201105190 | 0.066885518 | 0.625165031 |
| sp Q13217 DNIC3_HUMAN | 1   | 40 | 76 | 33 | -0.16827 | -0.063310643 | 0.14618093   | 0.007059644  | 0.314451217  | 0.209491573  | 0.127932805 | 8.98E-06    | 0.001051289 |
| sp Q9NST1 GKN1_HUMAN  |     |    |    |    |          |              |              |              |              |              |             |             |             |

|                        |     |    |    |    |          |              |              |              |              |              |             |             |             |
|------------------------|-----|----|----|----|----------|--------------|--------------|--------------|--------------|--------------|-------------|-------------|-------------|
| sp P01903 DRA_HUMAN    | 4   | 40 | 76 | 33 | 0.032938 | 0.081040614  | 0.160757882  | 0.04810246   | 0.127819728  | 0.079717268  | 0.737265458 | 0.230653051 | 0.481111024 |
| sp Q9H489 DPEP2_HUMAN  | 6   | 40 | 76 | 33 | 0.09588  | 0.145783177  | -0.041640792 | -0.04903576  | -0.137520393 | -0.187423969 | 0.443636802 | 0.016306653 | 9.50E-05    |
| sp Q90525 SEM3D_HUMAN  | 5   | 8  | 14 | 6  | -0.28087 | -0.312329713 | -0.288585088 | 0.03034619   | -0.007712725 | 0.023744625  | 0.957261913 | 0.979663815 | 0.979663815 |
| sp Q7L576 CYFPI_HUMAN  | 4   | 37 | 69 | 30 | -0.35028 | -0.119944453 | 0.156487067  | 0.23033445   | 0.50676397   | 0.27642952   | 0.218369158 | 0.007558786 | 0.150367584 |
| sp P00167 CYB5_HUMAN   | 23  | 30 | 55 | 24 | -0.07092 | 0.100064685  | 0.334278331  | 0.170984188  | 0.395197835  | 0.224213647  | 0.137764116 | 0.005055648 | 0.005055648 |
| sp P26639 SYTC_HUMAN   | 1   | 40 | 76 | 33 | -0.06252 | -0.094349723 | 0.244908558  | -0.031827873 | 0.307430408  | 0.339258281  | 0.946425324 | 0.032634116 | 0.005463051 |
| sp P09883 KCY_HUMAN    | 1   | 40 | 76 | 33 | -0.29152 | -0.141241513 | 0.127777461  | 0.150274716  | 0.419239689  | 0.269018973  | 0.290264238 | 0.001811473 | 0.033256459 |
| sp Q9NP98 MYOZ1_HUMAN  | 12  | 4  | 6  | 3  | 0.004958 | 0.010692812  | 1.586671638  | 0.005735218  | 1.581714043  | 1.575978825  | 0.999949824 | 0.107761144 | 0.081832946 |
| sp Q16772 GSTA3_HUMAN  | 3   | 36 | 69 | 30 | -0.36183 | -0.044941834 | 0.176669291  | 0.31688622   | 0.538496747  | 0.221611125  | 0.145382554 | 0.022942019 | 0.430081645 |
| sp Q9UIA9 XPO7_HUMAN   | 8   | 19 | 35 | 14 | -0.17237 | -0.031900101 | 0.319895531  | 0.140472171  | 0.492267582  | 0.351795411  | 0.546849705 | 0.011032261 | 0.052843887 |
| sp P02008 HBAZ_HUMAN   | 1   | 12 | 21 | 9  | -0.00516 | -0.15428431  | 0.653029089  | -0.149126561 | 0.658186837  | 0.807313398  | 0.800466598 | 0.070405955 | 0.009884215 |
| sp Q92743 HTRA1_HUMAN  | 11  | 40 | 76 | 33 | -0.23217 | -0.145512572 | 0.37879101   | 0.086667045  | 0.570052418  | 0.483391673  | 0.434253485 | 9.69E-10    | 4.44E-09    |
| sp Q680K9 HBM_HUMAN    | 8   | 4  | 7  | 3  | -0.40272 | -0.00890311  | 0.606140441  | 0.394634111  | 1.008864862  | 0.614230751  | 0.621083832 | 0.159473245 | 0.401481465 |
| sp Q9UGT4 SUSD2_HUMAN  | 7   | 40 | 76 | 33 | 0.081278 | 0.003640831  | 0.057746134  | -0.077637221 | -0.023531918 | 0.054105303  | 0.321853466 | 0.929902155 | 0.614635933 |
| sp P15531 NDKA_HUMAN   | 42  | 40 | 76 | 33 | -0.33588 | -0.105492124 | 0.165339494  | 0.230392181  | 0.501223799  | 0.270831618  | 0.108963615 | 6.10E-06    | 0.008460693 |
| sp P07814 SYEP_HUMAN   | 3   | 37 | 69 | 30 | -0.3997  | -0.164149395 | 0.267859191  | 0.235550269  | 0.667558855  | 0.432008586  | 0.071741955 | 2.05E-06    | 0.006591597 |
| sp P42244 STAT1_HUMAN  | 39  | 18 | 34 | 15 | -0.54305 | -0.223130075 | 0.142940656  | 0.319924791  | 0.785995522  | 0.46607073   | 0.227878284 | 0.003261471 | 0.066476873 |
| sp Q5I537 NHLC3_HUMAN  | 10  | 33 | 62 | 27 | -0.08304 | -0.025850085 | 0.272017985  | 0.057191655  | 0.255059725  | 0.19786807   | 0.600036576 | 0.001459504 | 0.006342827 |
| sp P67870 CSK2B_HUMAN  | 10  | 23 | 41 | 18 | 0.058679 | -0.009287538 | 0.103138239  | -0.067966945 | 0.044458831  | 0.112425776  | 0.608346739 | 0.863653295 | 0.319094209 |
| sp P19367 HKX1_HUMAN   | 20  | 33 | 62 | 27 | 0.088627 | -0.422535215 | -0.136585828 | -0.511162585 | -0.225213198 | 0.285949387  | 8.25E-05    | 0.251927516 | 0.062744005 |
| sp P62826 RAN_HUMAN    | 81  | 40 | 76 | 33 | -0.297   | -0.071188584 | 0.208281641  | 0.225809511  | 0.585179737  | 0.359370225  | 0.02940403  | 4.00E-07    | 0.000530778 |
| sp P01857 GHG1_HUMAN   | 2   | 40 | 76 | 33 | -0.4312  | -0.21572312  | 0.223048232  | 0.215473856  | 0.654245209  | 0.438771352  | 0.273795693 | 0.000439581 | 0.01044863  |
| sp Q96566 PEBP4_HUMAN  | 1   | 40 | 76 | 33 | 0.127081 | 0.209943017  | 0.26355338   | 0.082861699  | 0.14927402   | 0.066412321  | 0.450393107 | 0.170679857 | 0.636658889 |
| sp Q8XTA7 MUC7_HUMAN   | 2   | 11 | 21 | 9  | 0.015322 | -0.165684724 | -0.171298826 | -0.181009427 | -0.186620829 | -0.005611402 | 0.384698789 | 0.495922008 | 0.999176004 |
| sp Q92542 NICA_HUMAN   | 3   | 15 | 27 | 12 | 0.021522 | 0.026244841  | 0.126217834  | 0.004723223  | 0.104669217  | 0.099972993  | 0.998672114 | 0.639758103 | 0.602415694 |
| sp Q9UB54 DJB11_HUMAN  | 13  | 23 | 41 | 17 | -0.14516 | -0.076520817 | 0.098988255  | 0.06864194   | 0.244151011  | 0.175509071  | 0.755025099 | 0.102095897 | 0.23013643  |
| sp P98172 EFNB1_HUMAN  | 2   | 40 | 76 | 33 | -0.28156 | -0.138339178 | 0.327424692  | 0.143217326  | 0.608981196  | 0.46576387   | 0.261867052 | 3.98E-07    | 1.24E-07    |
| sp P41218 MMDA_HUMAN   | 1   | 14 | 28 | 12 | -0.46228 | -0.447059714 | 0.514861471  | 0.015219545  | 0.97714073   | 0.961921185  | 0.998453653 | 0.017920809 | 0.007020261 |
| sp P28062 PSB8_HUMAN   | 5   | 40 | 76 | 33 | -0.39403 | -0.239334468 | 0.273672313  | 0.15469756   | 0.667704341  | 0.513006781  | 0.292010193 | 8.18E-07    | 1.98E-07    |
| sp Q15818 NPTX1_HUMAN  | 21  | 36 | 69 | 31 | 0.190353 | 0.135726554  | 0.065250113  | -0.054626766 | -0.125103208 | -0.070476442 | 0.842588024 | 0.53301142  | 0.772971672 |
| sp P31944 CASPE_HUMAN  | 1   | 30 | 56 | 24 | -0.29526 | -0.283982978 | 0.552497572  | 0.011280201  | -0.257234393 | -0.268514594 | 0.99844969  | 0.578832799 | 0.473004689 |
| sp Q99784 NOE1_HUMAN   | 26  | 40 | 76 | 33 | 0.177181 | 0.152502415  | 0.113748599  | -0.024678471 | -0.063432293 | -0.038753821 | 0.735047761 | 0.249762111 | 0.518420136 |
| sp P17538 CTRB1_HUMAN  | 10  | 40 | 76 | 33 | -0.0701  | -0.022771653 | 0.062959961  | 0.0473281    | 0.133059713  | 0.085731614  | 0.765590004 | 0.237218991 | 0.465127684 |
| sp P00326 ADH1G_HUMAN  | 33  | 30 | 55 | 23 | -0.6153  | -0.26542586  | 0.073738383  | 0.349871886  | 0.68903613   | 0.339164243  | 0.144761377 | 0.056281176 | 0.645714999 |
| sp Q9P271 GMPR2_HUMAN  | 3   | 40 | 76 | 33 | -0.08769 | -0.066912386 | 0.281172952  | 0.020781021  | 0.368866359  | 0.348085338  | 0.984859307 | 0.04045107  | 0.026788774 |
| sp P55083 MFAP4_HUMAN  | 8   | 37 | 69 | 30 | 0.007503 | -0.04250214  | 0.263539282  | -0.050005412 | 0.256035988  | 0.306041422  | 0.828734039 | 0.033787039 | 0.026182575 |
| sp P02462 CO4A1_HUMAN  | 1   | 36 | 69 | 30 | -0.05744 | -0.048157983 | 0.190623327  | 0.009286888  | 0.248068198  | 0.23878131   | 0.99549337  | 0.113591107 | 0.07698687  |
| sp A6NGU5 GGT3_HUMAN   | 3   | 40 | 76 | 33 | -0.26162 | -0.205557798 | 0.150958776  | 0.056058179  | 0.412574752  | 0.356516574  | 0.847254422 | 0.02809031  | 0.003811102 |
| sp P14788 IL1R1_HUMAN  | 3   | 40 | 76 | 33 | 0.000684 | 0.056083913  | 0.203616071  | 0.055399805  | -0.004300179 | -0.059699985 | 0.357511773 | 0.995686498 | 0.35064411  |
| sp Q96ZP4 PITH1_HUMAN  | 3   | 40 | 76 | 33 | -0.29993 | -0.108672522 | -0.07153336  | 0.191256853  | 0.570082711  | 0.378825858  | 0.097766058 | 2.50E-06    | 0.00409873  |
| sp Q8X03 SCUB3_HUMAN   | 1   | 37 | 69 | 30 | 0.001259 | -0.169032603 | 0.147625731  | -0.170291375 | 0.146366959  | 0.316658334  | 0.067743333 | 0.249615222 | 0.00046663  |
| sp Q9ULC4 MCT5L_HUMAN  | 1   | 26 | 48 | 20 | -0.22348 | 0.054931252  | 0.419521599  | 0.27841284   | 0.643003188  | 0.364590347  | 0.243280682 | 0.006210327 | 0.133781702 |
| sp P14222 PERF_HUMAN   | 8   | 40 | 76 | 33 | 0.091129 | 0.105622314  | 0.058832556  | 0.014493369  | -0.032296389 | -0.046789757 | 0.941138248 | 0.812596422 | 0.575673515 |
| sp Q495515 FUT11_HUMAN | 2   | 40 | 76 | 33 | 0.108765 | 0.086488866  | 0.138954473  | -0.022275827 | 0.03018978   | 0.052465607  | 0.865583823 | 0.830445182 | 0.491624175 |
| sp Q9UIA9 ENPP5_HUMAN  | 1   | 16 | 27 | 11 | 0.176317 | -0.009729412 | -0.105852776 | -0.184246362 | -0.282169726 | -0.097923364 | 0.026525011 | 0.43720768  |             |
| sp Q9Y644 RFNG_HUMAN   | 16  | 15 | 28 | 13 | 0.159421 | 0.129199002  | 0.151982507  | -0.030222233 | -0.007438728 | 0.022783504  | 0.921348444 | 0.996461479 | 0.9853077   |
| sp Q92485 ASM3B_HUMAN  | 16  | 12 | 20 | 8  | -0.03864 | -0.0625871   | 0.188787148  | -0.023946077 | 0.227428171  | 0.251374248  | 0.968313201 | 0.170403955 | 0.080616428 |
| sp P41439 FOLR3_HUMAN  | 5   | 40 | 76 | 33 | -0.32058 | -0.075712633 | 0.147568776  | 0.244870686  | 0.468152095  | 0.223281409  | 0.032666511 | 0.000265268 | 0.08405976  |
| sp P55209 NP1L1_HUMAN  | 1   | 40 | 76 | 33 | -0.255   | -0.319879806 | -0.102840044 | -0.06488267  | 0.152157092  | 0.217039763  | 0.923251092 | 0.739122803 | 0.459004066 |
| sp Q13555 KCC2G_HUMAN  | 17  | 37 | 69 | 30 | 0.014003 | 0.094399197  | -0.083040352 | 0.080395908  | -0.09704364  | -0.177439549 | 0.236327209 | 0.235578602 | 0.002968289 |
| sp P50281 MMMP14_HUMAN | 11  | 14 | 27 | 12 | -0.20374 | 0.097454623  | 0.188683657  | 0.301192763  | 0.992421797  | 0.691229034  | 0.166627602 | 1.66E-05    | 0.00580507  |
| sp Q00264 PGR1_HUMAN   | 67  | 40 | 76 | 33 | -0.03511 | -0.007208331 | 0.240999601  | 0.027904541  | 0.276112473  | 0.248207932  | 0.881225137 | 0.000370234 | 0.000300816 |
| sp P62256 UBE2H_HUMAN  | 52  | 4  | 7  | 2  | -0.0076  | -0.056095655 | -0.372923779 | -0.04847069  | -0.365324904 | -0.136854214 | 0.982023822 | 0.599046316 | 0.635997002 |
| sp Q5VU06 OTU1_HUMAN   | 153 | 37 | 69 | 30 | -0.02808 | 0.029818186  | 0.2020785    | 0.057895415  | 0.230155729  | 0.172260314  | 0.736433241 | 0.039955976 | 0.100311919 |
| sp Q9NR19 ACSA_HUMAN   | 2   | 14 | 28 | 12 | 0.061823 | 0.145390544  | 0.494910268  | 0.083567671  | 0.433087394  | 0.349519723  | 0.90237394  | 0.209554588 | 0.209554588 |
| sp Q13283 G3BP1_HUMAN  | 7   | 18 | 34 | 15 | -0.24801 | -0.116212096 | 0.210492719  | 0.131793292  | 0.458498106  | 0.326704814  | 0.678626045 | 0.045227368 | 0.129964915 |
| sp Q72510 VMO1_HUMAN   | 12  | 40 | 76 | 33 | -0.48779 | -0.346312225 | 0.302357976  | 0.141479445  | 0.790027466  | 0.648548021  | 0.389751659 | 2.79E-08    | 2.51E-07    |
| sp P54760 EPHB4_HUMAN  | 7   | 40 | 76 | 33 | 0.020349 | 0.043549568  | 0.263517066  | 0.023201006  | 0.243168548  | 0.219967498  | 0.960644711 | 0.000933773 | 0.000713406 |
| sp P05997 COSA2_HUMAN  | 2   | 40 | 76 | 33 | 0.037691 | 0.058499135  | 0.289055753  | 0.020807701  | 0.251364319  | 0.230556618  | 0.942025891 | 0.003420499 | 0.002343335 |
| sp Q15008 PSMD6_HUMAN  | 619 | 15 | 28 | 11 | -0.06252 | -0.023407954 | 0.247308746  | 0.039112439  | 0.309829139  | 0.2707167    | 0.956671171 | 0.176269652 | 0.017607521 |
| sp Q75053 CLN5_HUMAN   | 11  | 40 | 76 | 33 | 0.043991 | -0.017057598 | 0.148423176  | -0.061048272 | 0.104432502  | 0.165480774  | 0.56850297  | 0.321922065 | 0.029229141 |
| sp P16444 DPEP1_HUMAN  | 5   | 37 | 69 | 30 | 0.139027 | 0.064790629  | 0.040655915  | -0.074236567 | -0.143683111 | -0.069446544 | 0.567073475 | 0.235192677 | 0.64945087  |
| sp Q9UI15 TAGL3_HUMAN  | 7   | 40 | 76 | 33 | -0.0829  | -0.135715719 | 0.027849623  | -0.052819844 | 0.110745497  | 0.163565342  | 0.734849862 | 0.39520895  | 0.079336418 |
| sp Q86X76 NIT1_HUMAN   | 28  | 25 | 49 | 21 | -0.37041 | -0.073087753 | 0.342479941  | 0.297319183  | 0.712886786  | 0.415567694  | 0.071578166 | 7.41E-05    | 0.015815955 |
| sp P12931 SRC_HUMAN    | 62  | 40 | 76 | 33 | -0.07476 | -0.035906568 | 0.640551929  | 0.038854162  | 0.11981266   | 0.080958497  | 0.927276868 | 0.610690518 | 0.750395579 |
| sp Q14894 T455_HUMAN   | 31  | 4  | 6  | 2  | -2.1392  | -1.44299171  | 0.296455742  | 0.696203907  | 0            |              |             |             |             |

|                       |     |    |    |    |          |               |              |              |              |              |              |             |             |
|-----------------------|-----|----|----|----|----------|---------------|--------------|--------------|--------------|--------------|--------------|-------------|-------------|
| sp Q9H2X0 CHR_D_HUMAN | 1   | 8  | 13 | 6  | 0.182855 | 0.085112697   | -0.038705507 | -0.097742005 | -0.221560209 | -0.123818205 | 0.658885002  | 0.242314743 | 0.576039218 |
| sp P01861 GHG4_HUMAN  | 18  | 40 | 76 | 3  | -0.33895 | -0.141077692  | -0.098058106 | 0.197872395  | 0.240891981  | 0.043019587  | 0.105971624  | 0.100846328 | 0.909116626 |
| sp Q9U065 GDF2_HUMAN  | 12  | 37 | 69 | 29 | -0.01669 | -0.017523448  | 0.103586624  | 0.001450623  | 0.120271695  | 0.118821071  | -0.999509997 | 0.008154515 | 0.069070904 |
| sp P61604 CH10_HUMAN  | 1   | 33 | 62 | 28 | -0.14643 | -0.003085354  | 0.443787702  | 0.143345481  | 0.590218536  | 0.464873056  | 0.547058852  | 0.001228041 | 0.006823874 |
| sp Q9GZM7 TINAL_HUMAN | 16  | 29 | 55 | 24 | -0.20839 | -0.101138061  | 0.017524449  | 0.107502589  | 0.225910359  | 0.11890507   | 0.438349493  | 0.088122545 | 0.408487715 |
| sp Q9Y235 ABEC2_HUMAN | 3   | 4  | 6  | 3  | 0.242025 | 0.007803717   | 1.895791247  | -0.234221647 | 1.653765883  | 1.887987531  | 0.963732484  | 0.311301933 | 0.186558221 |
| sp P06049 LV75_HUMAN  | 8   | 40 | 76 | 33 | -0.02348 | 0.037700989   | -0.041825469 | 0.061181441  | -0.018345017 | -0.079526458 | 0.525739084  | 0.960652524 | 0.386481259 |
| sp P01893 HLAH_HUMAN  | 90  | 22 | 41 | 19 | -0.24261 | -0.0173590239 | 0.152786297  | 0.069018128  | 0.395394664  | 0.326376536  | 0.854238411  | 0.036365166 | 0.047463448 |
| sp Q9H7M9 VISTA_HUMAN | 6   | 15 | 27 | 11 | -0.33166 | -0.115404578  | 0.05805084   | 0.216254246  | 0.389709665  | 0.173455418  | 0.122299728  | 0.045454005 | 0.451259098 |
| sp Q06124 PTN11_HUMAN | 1   | 40 | 76 | 33 | -0.37647 | -0.011416875  | 0.346261433  | 0.365050437  | 0.722728746  | 0.357678309  | 0.00273989   | 4.0E-07     | 0.006631142 |
| sp P36959 GMPR1_HUMAN | 4   | 31 | 55 | 23 | 0.028318 | 0.027789471   | 0.286400627  | -0.000528422 | 0.258082734  | 0.258611156  | 0.999993354  | 0.352968004 | 0.277937848 |
| sp Q14242 SELP_HUMAN  | 11  | 28 | 56 | 25 | 0.148259 | 0.021884195   | 0.241575491  | -0.126374608 | 0.093316688  | 0.219691296  | 0.504884629  | 0.767108915 | 0.152199791 |
| sp P30520 PURA2_HUMAN | 1   | 28 | 56 | 24 | -0.24482 | -0.114437384  | 0.310701804  | 0.130836215  | 0.555525402  | 0.425139188  | 0.50875674   | 0.000425156 | 0.002389361 |
| sp Q98U40 CRDL1_HUMAN | 12  | 36 | 69 | 30 | -0.0169  | -0.058748148  | 0.207767129  | -0.041846156 | 0.224669121  | 0.266515277  | 0.726195483  | 0.002487707 | 3.29E-05    |
| sp Q14982 OPCM_HUMAN  | 2   | 40 | 76 | 33 | 0.123098 | 0.032612387   | -0.058512219 | -0.155709964 | -0.181609796 | -0.025899832 | 0.028500097  | 0.035206729 | 0.914296645 |
| sp Q06088 CUTA_HUMAN  | 4   | 40 | 76 | 33 | 0.16433  | 0.264993916   | 0.327209957  | 0.100663627  | -0.137120332 | -0.237783959 | 0.170071818  | 0.1047041   | 0.000288784 |
| sp P13693 TCTP_HUMAN  | 6   | 40 | 76 | 33 | -0.06581 | -0.053523713  | 0.26422203   | 0.012286383  | 0.330032126  | 0.317745743  | 0.989859795  | 0.007999429 | 0.003519508 |
| sp Q8N3J6 CADM2_HUMAN | 1   | 32 | 62 | 28 | 0.051778 | -0.104393131  | -0.131568075 | -0.156171168 | -0.183346113 | -0.027174945 | 0.056605723  | 0.006649286 | 0.921111379 |
| sp Q95450 ATS2_HUMAN  | 11  | 19 | 34 | 13 | -0.70765 | -0.580662711  | 0.832171499  | 0.12698542   | 1.539819629  | 1.41283421   | 0.869422204  | 2.34E-05    | 1.86E-05    |
| sp Q06418 TYRO3_HUMAN | 9   | 40 | 76 | 33 | 0.083125 | 0.017367004   | 0.001555692  | -0.065757619 | -0.081568968 | -0.015811349 | 0.261010383  | 0.24055139  | 0.933238809 |
| sp P36888 FLT3_HUMAN  | 1   | 31 | 55 | 23 | 0.175336 | 0.027205175   | -0.044271096 | 0.096714667  | -0.219606602 | -0.316321271 | 0.465406365  | 0.006887391 | 0.001949497 |
| sp Q06058 PLOD3_HUMAN | 37  | 40 | 76 | 33 | -0.08285 | 0.032384678   | 0.271720659  | 0.11523962   | 0.354575601  | 0.239335981  | 0.130314053  | 5.60E-06    | 0.000659728 |
| sp Q9P289 STK26_HUMAN | 3   | 40 | 76 | 33 | -0.09143 | -0.129272507  | 0.169489178  | -0.037840097 | 0.260921588  | 0.298761685  | 0.963041474  | 0.295228617 | 0.132860817 |
| sp P46109 CRKL_HUMAN  | 24  | 40 | 76 | 33 | 0.027208 | -0.010515511  | 0.268209234  | -0.037723226 | 0.24100152   | 0.278724745  | 0.911358465  | 0.078283512 | 0.014105917 |
| sp Q9U1J4 GGT7_HUMAN  | 2   | 40 | 76 | 33 | -0.07914 | -0.249036817  | -0.438043758 | -0.169895247 | -0.358902188 | -0.189006942 | 0.073883211  | 0.000483211 | 0.059333443 |
| sp Q00233 PSMD9_HUMAN | 2   | 32 | 62 | 27 | -0.21098 | -0.090593385  | 0.238470529  | 0.120390315  | 0.449454229  | 0.329063914  | 0.373195948  | 0.000163397 | 0.002081029 |
| sp Q9Y6V9 LY96_HUMAN  | 15  | 33 | 62 | 27 | -0.23817 | -0.117661983  | 0.343416051  | 0.120509494  | 0.581587259  | 0.461078034  | 0.167827015  | 1.12E-10    | 5.79E-09    |
| sp Q8Y1T4 KATI2_HUMAN | 2   | 26 | 48 | 21 | -0.40884 | -0.407012088  | -0.147413072 | 0.001824908  | 0.261423924  | 0.259599016  | 0.99996663   | 0.625954463 | 0.559912078 |
| sp P46926 GNP1_HUMAN  | 22  | 28 | 56 | 24 | -0.03629 | 0.051006322   | 0.273525253  | 0.087301207  | 0.310647408  | 0.22346201   | 0.536991503  | 0.005848324 | 0.0294107   |
| sp P21810 PGS1_HUMAN  | 1   | 25 | 49 | 22 | -0.20547 | -0.088656015  | 0.279986376  | 0.116816479  | 0.485458869  | 0.36864239   | 0.454663307  | 0.000178247 | 0.001315371 |
| sp Q8Q214 KLOTB_HUMAN | 8   | 36 | 69 | 31 | -0.02803 | 0.048422217   | 0.045223113  | 0.076451837  | 0.073252733  | -0.003199104 | 0.649272544  | 0.756038452 | 0.999313097 |
| sp Q8Q209 PP2BA_HUMAN | 5   | 8  | 14 | 6  | -0.17508 | 0.25556345    | -0.16362823  | 0.430645004  | 0.011453364  | -0.41919168  | 0.052972307  | 0.998407428 | 0.994733524 |
| sp Q8NCV5 NNRE_HUMAN  | 1   | 40 | 76 | 33 | 0.014373 | 0.086724741   | 0.331567667  | 0.07235222   | 0.317195147  | 0.244842926  | 0.429161974  | 3.59E-05    | 0.000361145 |
| sp Q95394 AGM1_HUMAN  | 28  | 32 | 62 | 28 | -0.54778 | -0.204942061  | 0.322578634  | 0.342831527  | 0.870354852  | 0.527520695  | 0.008239259  | 6.43E-09    | 0.00061145  |
| sp P14550 AKI1A_HUMAN | 4   | 40 | 76 | 33 | -0.03364 | 0.036474016   | 0.386992757  | 0.070115287  | 0.420634028  | 0.350518741  | 0.567224357  | 3.56E-06    | 1.34E-05    |
| sp Q6U0X6 OLFMA_HUMAN | 13  | 25 | 48 | 21 | -0.24045 | -0.174527579  | 0.230457424  | 0.065924885  | 0.470909888  | 0.404985003  | 0.889475887  | 0.019727171 | 0.024064377 |
| sp Q8IX05 CD302_HUMAN | 15  | 4  | 7  | 3  | 0.043217 | -0.044726091  | 0.815035297  | -0.087943161 | 0.771818228  | 0.859761388  | 0.979288197  | 0.371963041 | 0.237242517 |
| sp Q60512 BAG7_HUMAN  | 5   | 11 | 21 | 9  | 0.112409 | 0.29740452    | 0.490235625  | 0.18499541   | 0.377826514  | 0.192831105  | 0.591445058  | 0.23216581  | 0.60750285  |
| sp Q27A24 IAH1_HUMAN  | 3   | 29 | 55 | 24 | -0.2358  | -0.169052178  | 0.135837335  | 0.066745355  | 0.371634869  | 0.304889514  | 0.796551599  | 0.009978186 | 0.018787849 |
| sp Q13045 FUL1_HUMAN  | 6   | 29 | 55 | 23 | -0.04968 | -0.161125844  | 0.211896459  | -0.111448424 | 0.261573879  | 0.373022303  | 0.769819509  | 0.3123858   | 0.086735919 |
| sp P24844 MYL9_HUMAN  | 161 | 10 | 21 | 9  | -0.37316 | -0.086718659  | 0.328294922  | 0.286446334  | 1.101459915  | 0.815013581  | 0.483456032  | 0.001792131 | 0.00084351  |
| sp Q9GZP0 PDGFR_HUMAN | 3   | 36 | 69 | 30 | -0.1472  | 0.115682105   | 0.362801189  | 0.26288033   | 0.510002383  | 0.247119083  | 0.026355029  | 0.000128686 | 0.057051443 |
| sp Q15782 CH3L2_HUMAN | 14  | 14 | 28 | 13 | 0.148082 | 0.115876526   | -0.035976594 | -0.032205096 | -0.184058216 | -0.15185312  | 0.951627586  | 0.319652662 | 0.358729182 |
| sp P26066 IT3A_HUMAN  | 3   | 25 | 48 | 22 | 0.063785 | -0.027806788  | 0.125544934  | -0.091592105 | 0.061759617  | 0.153351722  | 0.50182045   | 0.798753061 | 0.174343071 |
| sp Q9NR71 AGAH2_HUMAN | 4   | 40 | 76 | 33 | -0.03685 | -0.06695104   | 0.306867687  | -0.030104086 | -0.270020733 | -0.239916647 | 0.960518065  | 0.112351584 | 0.111261433 |
| sp Q8N2Q2 NLGN1_HUMAN | 12  | 11 | 21 | 10 | 0.159709 | 0.04379197    | 0.018372785  | -0.115916732 | -0.141335776 | -0.025419012 | 0.479598789  | 0.449534537 | 0.966366317 |
| sp Q92866 NEUG_HUMAN  | 2   | 40 | 76 | 33 | -0.35608 | -0.20345141   | 0.118201517  | 0.152632522  | 0.474285449  | 0.321652926  | 0.616731563  | 0.043612888 | 0.006686709 |
| sp P04626 ERBB2_HUMAN | 3   | 40 | 76 | 33 | 0.166701 | 0.04311058    | -0.092623519 | -0.123589182 | -0.259324281 | -0.135735098 | 0.02586396   | 3.01E-05    | 0.02103667  |
| sp P10124 SRG_HUMAN   | 3   | 40 | 76 | 33 | -0.26274 | -0.070485007  | 0.124009997  | 0.340781897  | 0.386836068  | 0.046054171  | 0.00484928   | 0.008520002 | 0.913769104 |
| sp P28066 PSA5_HUMAN  | 2   | 40 | 76 | 33 | -0.1923  | 0.005811276   | 0.547263422  | 0.198114162  | 0.739566308  | 0.541452146  | 0.143710559  | 8.16E-08    | 9.19E-06    |
| sp P50579 MAP2_HUMAN  | 61  | 8  | 16 | 6  | 0.324526 | 0.256840937   | 0.947388096  | 0.067684787  | 0.622862372  | 0.690547159  | 0.982423167  | 0.366429439 | 0.235103245 |
| sp P06132 DCUP_HUMAN  | 5   | 40 | 76 | 33 | -0.20517 | -0.107286474  | 0.215745765  | 0.097882211  | 0.42091445   | 0.323032239  | 0.551208602  | 0.000810631 | 0.004417019 |
| sp P35813 PMP1A_HUMAN | 1   | 40 | 76 | 33 | -0.11144 | -0.141866174  | 0.120499451  | -0.030428141 | 0.231937483  | 0.262365624  | 0.922551209  | 0.004711825 | 0.006723818 |
| sp Q13616 CUL1_HUMAN  | 4   | 37 | 69 | 30 | -0.17642 | -0.096776994  | 0.191334752  | 0.07964018   | 0.367751926  | 0.288111746  | 0.524031985  | 0.000166045 | 0.001040921 |
| sp Q43570 CAH12_HUMAN | 2   | 4  | 7  | 3  | -0.3037  | -0.228098991  | 0.779589368  | 0.075604857  | 1.083293216  | 1.007688359  | 0.2650995    | 0.000175047 | 0.000835259 |
| sp P01266 THYG_HUMAN  | 7   | 29 | 55 | 24 | 0.358235 | 0.471453017   | 0.340072791  | 0.113217568  | -0.018162657 | -0.131380225 | 0.851819514  | 0.997143517 | 0.82698666  |
| sp Q15067 PURA_HUMAN  | 18  | 29 | 55 | 24 | -0.22361 | -0.036431833  | 0.465392684  | 0.187182719  | 0.689007237  | 0.501824518  | 0.26778196   | 1.74E-05    | 0.000457835 |
| sp Q9U052 CNTN6_HUMAN | 1   | 18 | 35 | 15 | 0.204035 | 0.120331428   | 0.035233841  | -0.083703504 | -0.168801091 | -0.085097588 | 0.261921533  | 0.027492254 | 0.290516238 |
| sp Q15117 FYB1_HUMAN  | 1   | 33 | 62 | 27 | -0.12514 | -0.100649507  | 0.122384711  | 0.024489813  | 0.247524031  | 0.223034218  | 0.978633496  | 0.224401551 | 0.215254224 |
| sp P68036 UBZ1_HUMAN  | 6   | 40 | 76 | 33 | -0.07117 | -0.130223237  | 0.426648097  | 0.201395764  | 0.497820625  | 0.296424861  | 0.105868756  | 0.000139999 | 0.001518779 |
| sp P21830 CADH1_HUMAN | 14  | 40 | 76 | 33 | -0.03229 | -0.026784696  | 0.277443259  | 0.005505007  | 0.309733042  | 0.304227955  | 0.996158874  | 0.000420296 | 8.26E-05    |
| sp P32926 DSG3_HUMAN  | 5   | 8  | 14 | 6  | 0.068683 | 0.038522753   | -0.018120873 | 0.002808078  | -0.086803704 | -0.053943626 | 0.979193925  | 0.906219524 | 0.954380243 |
| sp P13861 KAP2_HUMAN  | 1   | 11 | 20 | 9  | -0.08651 | -0.059958663  | 0.495125969  | 0.026552931  | 0.581637563  | 0.555084632  | 0.986064973  | 0.015995798 | 0.009572349 |
| sp Q05315 LEG10_HUMAN | 1   | 4  | 6  | 3  | 0.372435 | 0.222275542   | 0.223598758  | -0.150159235 | -0.14883602  | 0.001323215  | 0.922625185  | 0.944920251 | 0.999994745 |
| sp Q02G72 NEXN_HUMAN  | 30  | 33 | 62 | 27 | -0.32762 | -0.323695008  | -0.013904212 | -0.005073094 | 0.313717702  | 0.318790797  | 0.999529794  | 0.294699021 | 0.203742827 |
| sp Q14203 DCTN1_HUMAN |     |    |    |    |          |               |              |              |              |              |              |             |             |



|                       |    |    |    |    |          |              |              |              |              |              |             |             |             |
|-----------------------|----|----|----|----|----------|--------------|--------------|--------------|--------------|--------------|-------------|-------------|-------------|
| sp P24298 ALAT1_HUMAN | 2  | 40 | 76 | 33 | -0.22069 | 0.004922728  | 0.086301778  | 0.225617688  | 0.306996739  | 0.08137905   | 0.065187415 | 0.03135812  | 0.726250917 |
| sp O75475 PSI1_HUMAN  | 1  | 20 | 41 | 18 | -0.36977 | 0.15962919   | 1.310937882  | 0.529457366  | 1.680703057  | 1.151245692  | 0.401405811 | 0.002586878 | 0.021807454 |
| sp P43234 CATO_HUMAN  | 7  | 36 | 69 | 30 | 0.058253 | 0.17579594   | 0.304351003  | 0.175542675  | 0.246097737  | 0.128555062  | 0.161195527 | 0.004853083 | 0.145323943 |
| sp Q9V559 RBM8A_HUMAN | 7  | 7  | 14 | 7  | -0.13961 | 0.092546623  | 0.266089993  | 0.232158979  | 0.405702719  | 0.17354374   | 0.268736457 | 0.059857773 | 0.471089086 |
| sp Q9H859 MOB1A_HUMAN | 2  | 40 | 76 | 33 | 0.162716 | 0.183810835  | 0.401354727  | 0.021094676  | 0.238638568  | 0.217543892  | 0.978260069 | 0.149129542 | 0.134201369 |
| sp Q96R97 G3ST4_HUMAN | 1  | 21 | 42 | 18 | 0.075034 | 0.068708069  | 0.16173594   | -0.006326043 | 0.086701828  | 0.093027871  | 0.995086049 | 0.530510405 | 0.389121467 |
| sp G6UW63 PLGT2_HUMAN | 1  | 4  | 7  | 3  | -0.01309 | -0.121271697 | 0.044090953  | -0.108186421 | 0.057176229  | 0.16536265   | 0.585407887 | 0.900351052 | 0.372386902 |
| sp Q9P1W8 SIRPG_HUMAN | 3  | 25 | 48 | 22 | -0.60404 | -0.291472979 | -0.144479675 | 0.312568993  | 0.459562297  | 0.146993304  | 0.45905757  | 0.303934566 | 0.852599602 |
| sp 076061 STC2_HUMAN  | 1  | 40 | 76 | 33 | 0.052432 | 0.12979858   | 0.218512991  | 0.077366484  | 0.166080895  | 0.088714411  | 0.178625767 | 0.005076615 | 0.137645584 |
| sp P36575 ARRC_HUMAN  | 5  | 21 | 42 | 19 | 0.128884 | -0.006582434 | 0.21055701   | -0.135466822 | 0.081690622  | 0.217157444  | 0.420393285 | 0.796963348 | 0.129861383 |
| sp O16539 MK14_HUMAN  | 2  | 40 | 76 | 33 | -0.06273 | -0.126872169 | 0.116823948  | -0.064419161 | 0.179554156  | 0.243696117  | 0.649846074 | 0.101720095 | 0.005503787 |
| sp P08134 RHOC_HUMAN  | 1  | 37 | 69 | 30 | 0.232162 | 0.23787826   | 0.513052361  | 0.005715872  | 0.280889973  | 0.2751741    | 0.998883996 | 0.162449887 | 0.11671811  |
| sp O14558 HSPB6_HUMAN | 4  | 4  | 6  | 3  | 0.280811 | 0.292720133  | 1.45721134   | 0.011909172  | 1.176400378  | 1.164491207  | 0.999825301 | 0.337711319 | 0.294394821 |
| sp Q8IUZ5 AT12_HUMAN  | 7  | 40 | 76 | 33 | 0.046069 | 0.101838891  | 0.296409074  | 0.055769452  | 0.250339635  | 0.194570183  | 0.686961749 | 0.006877941 | 0.020858059 |
| sp Q9Y263 PLAP_HUMAN  | 3  | 29 | 55 | 24 | 0.115917 | 0.262442458  | 0.458112678  | 0.146525727  | 0.342195947  | 0.19567022   | 0.422097406 | 0.042537091 | 0.260569908 |
| sp Q9H993 ARMT1_HUMAN | 5  | 30 | 55 | 23 | -0.01697 | 0.17451939   | 0.410839732  | 0.192422943  | 0.427810735  | 0.235387793  | 0.110557224 | 0.020515951 | 0.064938726 |
| sp P62333 PR310_HUMAN | 2  | 21 | 42 | 18 | -0.45219 | -0.157604876 | 0.184560324  | 0.29458413   | 0.636749329  | 0.3421652    | 0.054890582 | 0.000187779 | 0.030476958 |
| sp Q13162 PRDX4_HUMAN | 2  | 36 | 69 | 30 | -0.36982 | -0.152910207 | 0.307768221  | 0.216905519  | 0.677583587  | 0.460678428  | 0.073164336 | 1.83E-07    | 6.21E-07    |
| sp Q8NFY4 SEM6D_HUMAN | 23 | 40 | 76 | 33 | 0.005236 | -0.11288574  | -0.242259232 | -0.118122173 | -0.247495666 | -0.129373493 | 0.001092202 | 8.26E-09    | 0.000777655 |
| sp Q8I20Q AB11_HUMAN  | 1  | 39 | 76 | 33 | 0.059553 | 0.220400332  | 0.447801579  | 0.160847449  | 0.388248696  | 0.227401247  | 0.372992773 | 0.020902998 | 0.174526294 |
| sp Q9BQT9 CSTN3_HUMAN | 2  | 36 | 69 | 30 | 0.00709  | 0.007990251  | 0.079781241  | 0.000909004  | 0.072691034  | 0.071799999  | 0.999849225 | 0.509103578 | 0.431782308 |
| sp P18065 IBP2_HUMAN  | 5  | 40 | 76 | 33 | 0.020491 | -0.004612951 | 0.602380258  | -0.0251042   | 0.581889008  | 0.606993208  | 0.964800008 | 7.19E-06    | 1.32E-07    |
| sp P31153 METK2_HUMAN | 6  | 40 | 76 | 33 | -0.23302 | -0.054802912 | 0.247172094  | 0.178215554  | 0.48019056   | 0.301975006  | 0.054044488 | 1.74E-06    | 0.00085766  |
| sp Q9H185 XYLT2_HUMAN | 1  | 40 | 76 | 33 | -0.28457 | -0.067928831 | 0.040873564  | 0.216645509  | 0.325447904  | 0.108802395  | 0.075911809 | 0.010911999 | 0.558243382 |
| sp Q08495 DEMA_HUMAN  | 1  | 28 | 55 | 24 | -0.25911 | -0.389182932 | -0.025448325 | -0.130077615 | 0.233661492  | 0.363739107  | 0.681480685 | 0.042649887 | 0.02694957  |
| sp Q13976 KGP1_HUMAN  | 6  | 6  | 14 | 7  | 0.239043 | -0.234895648 | 0.081841211  | -0.473938186 | -0.157201329 | 0.316736859  | 0.535218745 | 0.94714487  | 0.730043669 |
| sp Q14032 BAAT_HUMAN  | 1  | 11 | 20 | 4  | -0.22944 | -0.12664067  | 0.482436537  | 0.102797186  | 0.711874392  | 0.609077207  | 0.914105041 | 0.062939614 | 0.029386343 |
| sp Q9H741 CLO49_HUMAN | 1  | 4  | 7  | 3  | 0.231817 | 0.294387988  | 0.391859144  | 0.062570929  | 0.160042085  | 0.097471156  | 0.725969804 | 0.276633423 | 0.536478805 |
| sp Q8WVX9 SELM_HUMAN  | 1  | 4  | 6  | 3  | 0.137166 | -0.012428934 | 0.429091007  | -0.149594983 | 0.291924959  | 0.441159942  | 0.775549317 | 0.051700373 | 0.02205777  |
| sp Q9UBR1 BUP1_HUMAN  | 7  | 33 | 62 | 27 | 0.028697 | 0.216703407  | 0.288982576  | 0.188006618  | 0.260285987  | 0.072279169  | 0.223949457 | 0.139991455 | 0.821850931 |
| sp Q96C23 GALM_HUMAN  | 2  | 10 | 21 | 9  | -0.24404 | -0.023044637 | 0.179660018  | 0.220999985  | 0.423704505  | 0.202704655  | 0.421047918 | 0.117944011 | 0.506285385 |
| sp Q9Y240 CLC11_HUMAN | 30 | 40 | 76 | 33 | -0.04901 | 0.00114192   | 0.246613364  | 0.05015039   | 0.295621834  | 0.245471444  | 0.694326861 | 0.000304069 | 0.00077265  |
| sp P28161 GSTM2_HUMAN | 3  | 40 | 76 | 33 | -0.11142 | -0.174229337 | -0.008741912 | -0.062811477 | 0.102675947  | 0.165487425  | 0.733916334 | 0.566205338 | 0.156465999 |
| sp Q03013 GSTM4_HUMAN | 2  | 14 | 28 | 13 | -0.80234 | -0.235094026 | -0.055229274 | 0.567250182  | 0.747114934  | 0.179864752  | 0.436964734 | 0.366267347 | 0.926200992 |
| sp Q99969 RARR2_HUMAN | 2  | 40 | 76 | 33 | -0.0255  | 0.111585571  | 0.293267382  | 0.137082993  | 0.318764704  | 0.181681812  | 0.006545282 | 4.76E-08    | 0.00051647  |
| sp Q14210 LY6D_HUMAN  | 12 | 40 | 76 | 33 | -0.10494 | -0.184241268 | 0.140118478  | -0.07922991  | 0.245060536  | 0.324359747  | 0.68312585  | 0.085691426 | 0.004882964 |
| sp Q9CHK5 AG04_HUMAN  | 1  | 4  | 7  | 3  | 0.013416 | 0.132972748  | 0.109029767  | 0.119557179  | 0.095614199  | -0.02394298  | 0.67688355  | 0.842524627 | 0.98701054  |
| sp P22307 NLTP_HUMAN  | 13 | 21 | 41 | 19 | 0.058689 | 0.058751366  | 0.338942892  | 6.28E-05     | 0.280254296  | 0.280191526  | 0.999999861 | 0.185275331 | 0.083157561 |
| sp P04216 THY1_HUMAN  | 7  | 40 | 76 | 33 | -0.06641 | -0.05386845  | 0.241981435  | 0.012825381  | 0.308393661  | 0.29556828   | 0.983992745 | 0.002349876 | 0.00090208  |
| sp P30405 PFIP_HUMAN  | 3  | 7  | 14 | 6  | -0.02023 | 0.15220586   | 0.158261015  | 0.172438463  | 0.178493166  | 0.006055155  | 0.873401716 | 0.904323994 | 0.999848863 |
| sp Q08752 PPIID_HUMAN | 1  | 7  | 14 | 6  | 0.241332 | 0.146491644  | 0.310160034  | -0.09484064  | 0.06882775   | 0.163668389  | 0.913722631 | 0.967552893 | 0.786485433 |
| sp P24855 DNAI1_HUMAN | 4  | 22 | 42 | 17 | -0.04126 | -0.151651225 | -0.235034751 | -0.110393821 | -0.193777347 | -0.083383526 | 0.68562808  | 0.464206049 | 0.834367366 |
| sp Q14232 EI2BA_HUMAN | 18 | 4  | 7  | 3  | -0.11417 | -0.063965437 | 0.37605825   | 0.050204428  | 0.490228115  | 0.440023687  | 0.972827306 | 0.216644991 | 0.220452027 |
| sp Q8TF64 GIPC3_HUMAN | 1  | 4  | 7  | 3  | 0.114215 | 0.163210152  | -0.012509141 | 0.048994757  | -0.126724535 | -0.175719293 | 0.944643204 | 0.777372198 | 0.562700422 |
| sp Q9UMY4 SNX12_HUMAN | 7  | 40 | 76 | 33 | 0.093435 | 0.034494576  | 0.398700906  | -0.058940181 | 0.305266149  | 0.364206329  | 0.759253509 | 0.007728124 | 0.000202171 |
| sp P32942 ICAM3_HUMAN | 2  | 40 | 76 | 33 | 0.076718 | 0.187750998  | 0.123710186  | 0.111033104  | 0.046992291  | -0.064040812 | 0.049291722 | 0.682259464 | 0.407124358 |
| sp Q5PE7 NOMO2_HUMAN  | 41 | 18 | 35 | 16 | 0.202384 | 0.172434703  | -0.08258028  | -0.029948927 | -0.28496391  | -0.255014983 | 0.896445649 | 0.001857629 | 0.010498576 |
| sp P16844 UTER_HUMAN  | 13 | 40 | 76 | 33 | -0.32314 | -0.244311999 | 0.258118634  | 0.078826976  | 0.581257609  | 0.502430633  | 0.728041171 | 2.14E-05    | 3.47E-05    |
| sp Q8N128 F177A_HUMAN | 1  | 22 | 41 | 17 | 0.05478  | -0.055019418 | 0.257515708  | -0.109799905 | 0.202371221  | 0.312171126  | 0.551483995 | 0.26252905  | 0.021756227 |
| sp Q13557 KCC2D_HUMAN | 7  | 40 | 76 | 33 | -0.11113 | 0.028483588  | -0.13666652  | 0.139611298  | -0.025538811 | -0.165150108 | 0.05833428  | 0.934765463 | 0.031279611 |
| sp Q13554 KCC2B_HUMAN | 3  | 29 | 55 | 24 | -0.02179 | -0.0262228   | -0.272560382 | 0.100168306  | 0.259769796  | -0.251938102 | 0.999993509 | 0.152556571 | 0.098661178 |
| sp Q00266 METK1_HUMAN | 3  | 4  | 7  | 3  | -0.54155 | -0.208530535 | 1.546266278  | 0.333020257  | 2.087817383  | 1.754796813  | 0.628211511 | 0.001399691 | 0.00240147  |
| sp Q8NCC3 PAG15_HUMAN | 8  | 40 | 76 | 33 | 0.020723 | 0.00489969   | 0.103636272  | 0.009767341  | 0.082913644  | 0.073146303  | 0.976616436 | 0.113777776 | 0.31625804  |
| sp P62140 PPI1B_HUMAN | 11 | 34 | 62 | 26 | -0.04018 | -0.060669728 | 0.369521162  | -0.025892127 | 0.409698822  | 0.435590949  | 0.949148079 | 0.000336524 | 1.86E-05    |
| sp Q8NEU8 DP13B_HUMAN | 6  | 18 | 34 | 14 | 0.008665 | -0.055424129 | 0.354647124  | 0.064089246  | 0.345982006  | 0.410071252  | 0.929856058 | 0.211601303 | 0.090939079 |
| sp P54727 RD23B_HUMAN | 54 | 40 | 76 | 33 | -0.11863 | -0.169852183 | 0.264022466  | -0.051221444 | 0.382653205  | 0.433874649  | 0.845620458 | 0.002288085 | 6.63E-05    |
| sp Q9B932 ITPA_HUMAN  | 1  | 7  | 14 | 6  | -0.13468 | -0.053870734 | 0.241586439  | 0.080811876  | 0.376269049  | 0.295457173  | 0.883365566 | 0.177443143 | 0.244954259 |
| sp P16871 IL7RA_HUMAN | 6  | 40 | 76 | 33 | 0.257077 | 0.20904513   | 0.044830723  | -0.048032122 | -0.212246529 | -0.164214407 | 0.751886196 | 0.024521016 | 0.057885262 |
| sp Q5J2Y3 EPHAA_HUMAN | 3  | 7  | 14 | 6  | -0.05839 | -0.1263343   | 0.101797404  | -0.067943656 | -0.04340676  | 0.024536897  | 0.849349301 | 0.954671519 | 0.980891373 |
| sp P18510 IL1RA_HUMAN | 3  | 10 | 20 | 10 | -0.96212 | -0.590016426 | 0.410720289  | 0.372105924  | 1.372842639  | 1.000736715  | 0.619171874 | 0.042961294 | 0.041261676 |
| sp Q9Z905 CSN5_HUMAN  | 1  | 15 | 28 | 12 | -0.53973 | -0.22454186  | 0.371997115  | 0.315189697  | 0.911728671  | 0.596538975  | 0.163843758 | 0.001047421 | 0.005718692 |
| sp P09326 CD48_HUMAN  | 33 | 40 | 76 | 33 | -0.05144 | 0.038894289  | 0.066907789  | 0.090332911  | 0.11834569   | 0.0280135    | 0.326478769 | 0.266674945 | 0.99084467  |
| sp Q15746 MYLK_HUMAN  | 6  | 40 | 76 | 33 | 0.044814 | -0.001335587 | 0.045720089  | -0.046149244 | 0.000906433  | 0.047055677  | 0.861924891 | 0.999990387 | 0.873147656 |
| sp P55212 CASP6_HUMAN | 6  | 21 | 42 | 18 | -0.10829 | -0.184950066 | 0.184156958  | -0.076657957 | 0.292449067  | 0.369107024  | 0.898132694 | 0.152556571 | 0.114546301 |
| sp P24666 PPAC_HUMAN  | 9  | 40 | 76 | 33 | -0.14626 | -0.06266592  | 0.176557563  | 0.083597359  | 0.322821514  | 0.239224155  | 0.647129446 | 0.013530163 | 0.047594614 |
| sp Q14651 PLS1_HUMAN  | 4  | 40 | 76 | 33 | -0.19499 | -0.084921938 | 0.138011606  | 0.279916301  | 0.33309      |              |             |             |             |

|                        |     |    |    |    |          |              |              |              |              |              |             |             |             |
|------------------------|-----|----|----|----|----------|--------------|--------------|--------------|--------------|--------------|-------------|-------------|-------------|
| sp P61019 RAB2A_HUMAN  | 1   | 33 | 62 | 27 | 0.019608 | 0.072924186  | 0.384679108  | 0.053315753  | 0.365070676  | 0.311754922  | 0.793115745 | 0.000977531 | 0.001601728 |
| sp P60022 DEFB1_HUMAN  | 1   | 36 | 69 | 30 | -0.17874 | -0.128414335 | -0.147492153 | 0.050323019  | 0.326229507  | 0.275906488  | 0.837069037 | 0.00739005  | 0.011053769 |
| sp Q9H082 RB33B_HUMAN  | 3   | 6  | 14 | 7  | -1.16468 | -0.85459409  | -0.717021971 | 0.261884352  | 0.345756471  | 0.083872119  | 0.841236657 | 0.798588627 | 0.980354202 |
| sp Q00584 RNT2_HUMAN   | 13  | 40 | 76 | 33 | 0.206238 | 0.112552655  | 0.30685174   | -0.093685184 | 0.100613902  | 0.194299086  | 0.311776542 | 0.400693844 | 0.105054919 |
| sp Q9H488 PPCS_HUMAN   | 2   | 17 | 35 | 15 | 0.115327 | 0.132406285  | 0.1324065124 | 0.017078795  | 0.217277634  | 0.200198838  | 0.988313232 | 0.274840788 | 0.236541979 |
| sp P12956 XRC6_HUMAN   | 6   | 21 | 42 | 18 | -0.03628 | -0.042465921 | 0.506041172  | -0.006188219 | 0.542318874  | 0.548507093  | 0.99922254  | 0.020638745 | 0.006320244 |
| sp A8MVV5 HECA2_HUMAN  | 4   | 30 | 55 | 23 | 0.180464 | 0.055322393  | -0.073962125 | -0.12514492  | -0.254390011 | -0.129248518 | 0.120263061 | 0.003644132 | 0.150589502 |
| sp Q96C24 SYTL4_HUMAN  | 11  | 4  | 7  | 3  | 0.26423  | -0.0239036   | -0.30699022  | -0.288133534 | -0.571220154 | -0.28308662  | 0.584855454 | 0.268151418 | 0.649539013 |
| sp Q75L77 PODN_HUMAN   | 24  | 36 | 69 | 30 | -0.04608 | -0.022314751 | 0.081605094  | 0.023767282  | 0.127687127  | 0.103919845  | 0.883608819 | 0.090014082 | 0.129245312 |
| sp Q02750 MPZK1_HUMAN  | 3   | 4  | 7  | 3  | -0.05741 | -0.080553087 | 0.107022439  | -0.023142678 | 0.164432849  | 0.187575526  | 0.990718411 | 0.734840788 | 0.015958977 |
| sp Q9HB71 CYBP_HUMAN   | 5   | 17 | 35 | 15 | -0.07436 | -0.188984275 | 0.396690923  | -0.114622849 | 0.471052349  | 0.585675198  | 0.803353196 | 0.084934454 | 0.008188888 |
| sp Q15123 ANGP2_HUMAN  | 36  | 11 | 21 | 9  | -0.08855 | -0.107174049 | 0.239798187  | -0.018620648 | 0.328351588  | 0.346972236  | 0.989900671 | 0.130576893 | 0.059291642 |
| sp Q14116 IL18_HUMAN   | 1   | 24 | 48 | 21 | -0.19019 | -0.084680349 | 0.319089748  | 0.105506844  | 0.509276941  | 0.403770097  | 0.649104403 | 0.001561858 | 0.004612852 |
| sp P40197 GPV_HUMAN    | 88  | 40 | 76 | 33 | -0.12092 | 0.182341081  | 0.099982444  | 0.303260058  | 0.220901421  | -0.082358637 | 1.52E-05    | 0.013190008 | 0.452081994 |
| sp Q8TEM1 PO210_HUMAN  | 18  | 16 | 27 | 11 | 0.125305 | 0.122133614  | 0.102611276  | -0.00317106  | -0.022693398 | -0.019522338 | 0.999350846 | 0.978663479 | 0.981043305 |
| sp P07478 TRY2_HUMAN   | 14  | 40 | 76 | 33 | 0.033772 | 0.079990457  | 0.046573038  | 0.046218556  | 0.451965137  | 0.405746581  | 0.92371425  | 0.006884496 | 0.006099624 |
| sp Q15400 STX7_HUMAN   | 32  | 22 | 41 | 18 | -0.11516 | -0.07652956  | 0.689638574  | 0.038626967  | 0.8047951    | 0.766168133  | 0.954468716 | 7.8E-06     | 2.15E-06    |
| sp Q6UWL2 SUSD1_HUMAN  | 11  | 25 | 49 | 21 | -0.05788 | 0.005975734  | 0.059981036  | 0.063857806  | -0.038098964 | -0.10195677  | 0.749785798 | 0.931557502 | 0.522868651 |
| sp P53990 IST1_HUMAN   | 2   | 18 | 35 | 16 | -0.42209 | -0.424178305 | -0.056443268 | -0.002091336 | 0.478530236  | 0.480621572  | 0.999957781 | 0.216499942 | 0.13752602  |
| sp P48507 GSHO_HUMAN   | 23  | 40 | 76 | 33 | -0.32794 | -0.071681768 | 0.277009143  | 0.256254467  | 0.604945378  | 0.348690911  | 0.006162451 | 2.51E-08    | 0.000321512 |
| sp Q95356 6PCL_HUMAN   | 14  | 40 | 76 | 33 | -0.00835 | 0.036475215  | 0.587248793  | 0.044823461  | 0.595597019  | 0.550773578  | 0.892286562 | 4.40E-06    | 1.66E-06    |
| sp Q9A988 LRIG2_HUMAN  | 6   | 33 | 62 | 27 | 0.246463 | 0.081682514  | 0.085861561  | -0.164780326 | -0.160601279 | 0.004179047  | 0.095230856 | 0.211212474 | 0.998641984 |
| sp P63241 IF5A1_HUMAN  | 1   | 40 | 76 | 33 | -0.28743 | -0.125906846 | 0.285397961  | 0.16152809   | 0.572832897  | 0.411304807  | 0.352227627 | 0.005321006 | 0.003454    |
| sp P54136 SYRC_HUMAN   | 1   | 18 | 35 | 15 | -0.08075 | -0.177935288 | 0.245620155  | -0.097187235 | 0.326368208  | 0.423555443  | 0.711332335 | 0.079221968 | 0.00544486  |
| sp P06730 IF4E_HUMAN   | 37  | 40 | 76 | 33 | -0.11078 | -0.074417263 | 0.286931791  | 0.036363024  | 0.396694078  | 0.360331054  | 0.931208649 | 0.003948767 | 0.003040667 |
| sp P08514 ITIA2_HUMAN  | 2   | 36 | 70 | 30 | -0.38825 | -0.086720263 | 0.118107098  | 0.301527378  | 0.506354739  | 0.204827362  | 0.012781966 | 0.000291881 | 0.160954162 |
| sp Q99865 MGLL_HUMAN   | 5   | 33 | 62 | 27 | 0.050806 | 0.080304309  | 0.069195754  | 0.029497823  | 0.018389269  | -0.01108555  | 0.961694655 | 0.98958432  | 0.995172036 |
| sp P61601 NCAID_HUMAN  | 21  | 20 | 41 | 19 | -0.1067  | -0.042800498 | 0.240854205  | 0.063901344  | 0.347556048  | 0.283654703  | 0.882542461 | 0.076379061 | 0.10092793  |
| sp Q9Y2X8 UBD2D_HUMAN  | 23  | 11 | 20 | 9  | 0.068946 | 0.073220981  | 0.057426951  | 0.004275301  | -0.011518729 | -0.01579403  | 0.998814929 | 0.09401514  | 0.985915676 |
| sp P61106 RAB14_HUMAN  | 3   | 36 | 69 | 31 | -0.13784 | -0.154510354 | 0.272844759  | -0.016675226 | 0.410679887  | 0.427355113  | 0.98409974  | 0.001681048 | 0.000169948 |
| sp Q9U4J2 CBPA4_HUMAN  | 10  | 10 | 21 | 10 | 0.003572 | 0.055684171  | -0.190202436 | 0.05211222   | -0.196596307 | -0.248708516 | 0.813406793 | 0.128500984 | 0.015389262 |
| sp P80188 NGAL_HUMAN   | 10  | 40 | 76 | 33 | -0.20375 | -0.040148718 | 0.930077091  | 0.163603093  | 0.693828901  | 0.530225808  | 0.287002959 | 1.00E-06    | 2.70E-05    |
| sp Q75822 EIF3_HUMAN   | 44  | 4  | 6  | 3  | -0.31883 | -0.16680457  | 0.369393182  | 0.152151882  | 0.68822416   | 0.536072277  | 0.965167808 | 0.610246812 | 0.701336858 |
| sp Q8N114 SHSAs_HUMAN  | 1   | 7  | 14 | 6  | -0.65669 | -0.515026662 | 0.568106758  | 0.141665852  | 1.224799272  | 1.08313342   | 0.936176203 | 0.045374665 | 0.043378191 |
| sp P63302 SELW_HUMAN   | 64  | 4  | 6  | 3  | 0.253349 | 0.095221251  | 1.59307659   | -0.158127991 | 1.339727347  | 1.497855338  | 0.958949133 | 0.165683034 | 0.089486616 |
| sp P09619 PGRFB_HUMAN  | 36  | 40 | 76 | 33 | 0.093555 | 0.009195013  | -0.061536077 | -0.084359611 | -0.155090701 | -0.070731089 | 0.390207173 | 0.114556577 | 0.558189531 |
| sp P31431 SDC4_HUMAN   | 6   | 40 | 76 | 33 | -0.34206 | 0.143470201  | 0.051915991  | 0.48531409   | 0.393977199  | -0.09155421  | 2.77E-10    | 1.70E-05    | 0.434829348 |
| sp P02792 FRIL_HUMAN   | 1   | 40 | 76 | 33 | -0.47744 | -0.187989291 | 0.759909989  | 0.289454376  | 1.237353656  | 0.94789928   | 0.183751482 | 1.10E-08    | 6.95E-07    |
| sp P30711 GSTT1_HUMAN  | 103 | 4  | 7  | 3  | 0.719449 | 0.454278197  | -0.091642988 | -0.265170503 | -0.811091687 | -0.545921184 | 0.448818232 | 0.023353916 | 0.091212975 |
| sp Q43451 MGA_HUMAN    | 9   | 34 | 62 | 26 | -0.16281 | -0.115046812 | 0.136135037  | 0.047764375  | 0.298946224  | 0.251181849  | 0.902370989 | 0.046469971 | 0.099491125 |
| sp P14691 MYL6B_HUMAN  | 1   | 40 | 76 | 33 | -0.49415 | -0.256057406 | 0.404848643  | 0.23809548   | 0.898701529  | 0.660606049  | 0.156033012 | 8.51E-08    | 8.70E-06    |
| sp Q00442 RTCA_HUMAN   | 2   | 11 | 21 | 9  | -0.10933 | 0.058270925  | 0.210837306  | 0.167599304  | 0.320165685  | 0.152566382  | 0.648940117 | 0.345853575 | 0.730633526 |
| sp Q25330 PSMF1_HUMAN  | 4   | 22 | 41 | 17 | -0.19804 | -0.005779436 | 0.375591419  | 0.192264431  | 0.573635287  | 0.381370856  | 0.251202629 | 0.000572302 | 0.012960691 |
| sp Q9H159 CAD19_HUMAN  | 6   | 40 | 76 | 33 | 0.077794 | 0.027653648  | 0.054696367  | -0.050139988 | -0.023097269 | 0.027042718  | 0.42923181  | 0.882684893 | 0.804564424 |
| sp Q16762 THTR_HUMAN   | 8   | 8  | 13 | 6  | -0.25624 | -0.003620026 | 0.570440111  | 0.252617371  | 0.826677508  | 0.574060137  | 0.520541546 | 0.01618121  | 0.077300325 |
| sp Q13185 CBX3_HUMAN   | 5   | 7  | 14 | 7  | -0.39835 | -0.417419065 | 0.405195322  | -0.019073955 | 0.806504431  | 0.825578387  | 0.998083915 | 0.098173097 | 0.043781748 |
| sp P35247 SFTFPD_HUMAN | 6   | 40 | 76 | 33 | -0.31402 | -0.264474921 | 0.329871435  | 0.049542636  | 0.643888992  | 0.594346356  | 0.90605511  | 3.07E-05    | 1.39E-05    |
| sp P11166 GTR1_HUMAN   | 7   | 15 | 28 | 11 | -0.85686 | -0.705924257 | -0.153694161 | 0.150933403  | 0.703163499  | 0.552230097  | 0.649575009 | 0.00425338  | 0.013962683 |
| sp Q01546 K22O_HUMAN   | 2   | 36 | 69 | 30 | 0.016083 | -0.462559727 | -0.656165557 | -0.478642751 | -0.667248582 | -0.188605831 | 0.122266039 | 0.006613029 | 0.745026202 |
| sp Q96JF2 DYL2_HUMAN   | 8   | 37 | 69 | 30 | -0.25059 | -0.10826318  | 0.220801161  | 0.142331274  | 0.471395614  | 0.329064341  | 0.409053013 | 0.001729889 | 0.018155834 |
| sp Q9UBV9 HSPB7_HUMAN  | 8   | 4  | 6  | 3  | 0.033524 | 0.011014477  | 1.356688638  | -0.022509805 | 1.323164357  | 1.345674161  | 0.999398575 | 0.27407148  | 0.217900277 |
| sp Q75608 LYPA1_HUMAN  | 3   | 40 | 76 | 33 | -0.11701 | -0.264543906 | -0.006371891 | -0.147534211 | 0.110637804  | 0.258172015  | 0.31195158  | 0.634181303 | 0.046388505 |
| sp P07741 APT_HUMAN    | 26  | 40 | 76 | 33 | -0.19666 | -0.197675619 | 0.147635992  | -0.001020255 | 0.344291356  | 0.345311611  | 0.999590975 | 0.052566257 | 0.00917289  |
| sp P04792 HSPB1_HUMAN  | 8   | 40 | 76 | 33 | -0.08222 | -0.237206141 | 0.317489116  | -0.154988113 | 0.399707144  | 0.554695258  | 0.482014462 | 0.038306758 | 0.00047214  |
| sp P26842 CD27_HUMAN   | 4   | 32 | 62 | 27 | -0.63438 | -0.633441341 | -0.159866804 | 0.000941815  | 0.474516351  | 0.473574537  | 0.699979316 | 0.01217186  | 0.003817384 |
| sp Q96P44 COLA1_HUMAN  | 4   | 14 | 28 | 12 | 0.08612  | 0.010009479  | -0.070485659 | -0.076110663 | -0.1566058   | -0.080495137 | 0.593646261 | 0.224464284 | 0.591607502 |
| sp P13942 COBA2_HUMAN  | 2   | 40 | 76 | 33 | 0.224592 | 0.009564559  | -0.608214243 | -0.215027343 | -0.827413326 | -0.612385983 | 0.107751559 | 3.55E-09    | 6.94E-07    |
| sp P68032 ACTC_HUMAN   | 4   | 40 | 76 | 33 | -0.14879 | -0.34040623  | -0.002220043 | -0.191620067 | 0.13956412   | 0.331184187  | 0.234898838 | 0.585457743 | 0.02445493  |
| sp A5A3E0 POTEF_HUMAN  | 2   | 4  | 8  | 2  | 0.144908 | -0.160965965 | 0.248516256  | -0.305877238 | 0.103607983  | 0.409482221  | 0.191182716 | 0.870000672 | 0.063821471 |
| sp P0C638 POTEI_HUMAN  | 12  | 4  | 6  | 2  | 0.114757 | -0.349970452 | 0.573646559  | -0.464742635 | 0.458889646  | 0.923617011  | 0.322887114 | 0.52291406  | 0.019426671 |
| sp P0C309 POTEJ_HUMAN  | 12  | 25 | 48 | 21 | -0.05971 | -0.261220455 | 0.112579538  | -0.2015146   | 0.172285393  | 0.373799993  | 0.405064947 | 0.630241586 | 0.067714715 |
| sp P48052 CBPA2_HUMAN  | 2   | 31 | 60 | 27 | 0.139744 | 0.00305196   | 0.517786068  | -0.136692493 | 0.018041615  | 0.154734108  | 0.279366574 | 0.984193275 | 0.24564723  |
| sp Q9Y4Y9 LSM5_HUMAN   | 38  | 4  | 6  | 3  | 0.485221 | 0.536160582  | 0.362727377  | 0.050939651  | -0.122493555 | -0.173433206 | 0.958573974 | 0.841657462 | 0.674440598 |
| sp Q96G69 DCN1L_HUMAN  | 2   | 18 | 35 | 15 | -0.1495  | -0.091660009 | 0.252091315  | 0.191962327  | 0.401595543  | 0.323431306  | 0.300631902 | 0.138795327 | 0.016766618 |
| sp Q86T71 PRUN1_HUMAN  | 1   | 22 | 42 | 18 | -0.04702 | 0.116560312  | 0.18708262   | 0.163579798  | 0.234102106  | 0.070522308  | 0.42701117  | 0.304683811 | 0.086954527 |
| sp Q8MVW8 SCFD1_HUMAN  | 3   | 28 | 55 | 24 | -0       |              |              |              |              |              |             |             |             |

|                           |    |    |    |    |          |              |              |              |              |              |             |             |             |
|---------------------------|----|----|----|----|----------|--------------|--------------|--------------|--------------|--------------|-------------|-------------|-------------|
| sp Q15286 RAB35_HUMAN     | 1  | 18 | 34 | 16 | -0.13916 | -0.048499787 | 0.293964115  | 0.090660944  | 0.433124846  | 0.342463902  | 0.853604491 | 0.083154985 | 0.133314969 |
| sp Q86TD4 SRCA_HUMAN      | 31 | 23 | 41 | 17 | 0.090936 | 0.062987447  | -0.007204807 | -0.027948759 | -0.098141013 | -0.070192254 | 0.921975414 | 0.015780324 | 0.659959601 |
| sp 0929030 RAB88_HUMAN    | 2  | 18 | 35 | 14 | -0.40662 | -0.233565653 | 0.394880247  | 0.173054853  | 0.801500754  | 0.6284459    | 0.628163428 | 0.002600044 | 0.008635146 |
| sp P29992 GNA11_HUMAN     | 4  | 4  | 7  | 3  | -0.09034 | 0.326545524  | -0.009090245 | 0.415981093  | -0.000573675 | -0.16554769  | 0.38389427  | 0.999998655 | 0.444575741 |
| sp Q98RR6 ADPGK_HUMAN     | 39 | 4  | 7  | 3  | -0.07251 | 0.078658462  | -0.07428256  | 0.151167272  | -0.004919446 | -0.156086718 | 0.575672048 | 0.999584814 | 0.613425926 |
| sp Q9GZN8 CTO27_HUMAN     | 19 | 30 | 55 | 24 | -0.38382 | -0.249851045 | 0.11016999   | 0.133968505  | 0.493989539  | 0.360021034  | 0.595018695 | 0.010047835 | 0.044159714 |
| sp Q9UQC9 CLCA2_HUMAN     | 1  | 22 | 42 | 17 | 0.342175 | 0.107727461  | 0.016925687  | -0.234447161 | -0.325248935 | -0.090801773 | 0.010556393 | 0.00306762  | 0.543274864 |
| sp Q9UKU9 JANGL2_HUMAN    | 1  | 40 | 76 | 33 | -0.021   | 0.00148832   | 0.265042294  | 0.022491907  | 0.286045881  | 0.263553974  | 0.894538756 | 1.42E-05    | 6.31E-05    |
| sp Q14561 ACPM_HUMAN      | 9  | 4  | 6  | 3  | 0.053716 | 0.094742797  | 1.231969003  | 0.041027229  | 1.178253435  | 1.137226206  | 0.998172428 | 0.378117747 | 0.350479246 |
| sp Q8NBZ7 UXS1_HUMAN      | 11 | 4  | 6  | 3  | -0.01299 | -0.082723904 | -0.50026263  | -0.069730726 | -0.487269452 | -0.417538726 | 0.807481520 | 0.010114496 | 0.015837482 |
| sp Q01344 IL5RA_HUMAN     | 8  | 4  | 7  | 3  | -0.37256 | -0.138157526 | -0.491612411 | 0.234399838  | -0.119055047 | -0.353454884 | 0.372767843 | 0.830910884 | 0.178634431 |
| sp Q15459 SF3A1_HUMAN     | 70 | 4  | 6  | 3  | -0.03816 | 0.274541136  | 0.753525381  | 0.312705929  | 0.791690174  | 0.478984245  | 0.859842288 | 0.519170796 | 0.747563458 |
| sp O15389 SIGL5_HUMAN     | 4  | 40 | 76 | 33 | -0.59687 | -0.218961074 | -0.340318677 | 0.377905018  | 0.256547415  | -0.121357603 | 0.198738875 | 0.594662342 | 0.861927042 |
| sp P07738 PMGE_HUMAN      | 6  | 40 | 76 | 33 | -0.34092 | -0.17039902  | 0.377781465  | 0.170523135  | 0.71870362   | 0.548180485  | 0.273909765 | 1.78E-07    | 2.21E-05    |
| sp P37173 TGFBR2_HUMAN    | 11 | 40 | 76 | 33 | -0.08023 | -0.073690148 | 0.216442209  | 0.006542242  | 0.2966746    | 0.290132357  | 0.994899865 | 0.00114296  | 0.000292095 |
| sp Q9Y2V2 CHSP1_HUMAN     | 2  | 30 | 55 | 23 | -0.51584 | -0.211309047 | 0.25995396   | 0.304532792  | 0.775795799  | 0.471263007  | 0.066960672 | 2.32E-05    | 0.005311498 |
| sp O10589 BST2_HUMAN      | 7  | 26 | 48 | 20 | -0.63504 | -0.165338103 | 0.377803533  | 0.469701465  | 1.0128431    | 0.543141636  | 0.044833921 | 0.000312863 | 0.034198638 |
| sp P08861 CEL3B_HUMAN     | 9  | 36 | 69 | 30 | -0.23754 | -0.230471201 | 0.136846922  | 0.007073541  | 0.374391664  | 0.367318123  | 0.998401912 | 0.049939514 | 0.025741482 |
| sp Q9NN66 CD209_HUMAN     | 1  | 11 | 20 | 9  | -0.06518 | -0.05744733  | 0.354361634  | 0.007729319  | 0.419538283  | 0.411808963  | 0.998122118 | 0.031112185 | 0.016397054 |
| sp Q9NT12 EMIL3_HUMAN     | 3  | 36 | 69 | 30 | 0.193502 | 0.037307391  | -0.386512528 | -0.156194562 | -0.530017211 | -0.373822649 | 0.082520867 | 3.49E-08    | 1.00E-05    |
| sp P29692 EF1D_HUMAN      | 1  | 29 | 55 | 25 | -0.0604  | -0.048808395 | 0.26958106   | 0.011592194  | 0.329981649  | 0.318389955  | 0.996451218 | 0.137454367 | 0.095005338 |
| sp Q14964 RB39A_HUMAN     | 7  | 6  | 14 | 7  | -0.68491 | -0.298670244 | 0.286921122  | 0.386244379  | 0.971835745  | 0.85591366   | 0.390001131 | 0.018600331 | 0.104300303 |
| sp Q96N76 HUTU_HUMAN      | 20 | 30 | 55 | 24 | -0.0866  | 0.009628172  | 0.330226053  | 0.096226372  | 0.416824253  | 0.32059788   | 0.596611922 | 0.002044889 | 0.009301689 |
| sp P37235 HPC1L_HUMAN     | 3  | 37 | 69 | 30 | -0.18622 | -0.091397873 | 0.175578585  | 0.094825358  | 0.361801816  | 0.266976458  | 0.693117576 | 0.02890180  | 0.085028284 |
| sp Q16661 GUC2B_HUMAN     | 7  | 40 | 76 | 33 | 0.020956 | -0.029808753 | 0.182459616  | -0.050764285 | 0.161504083  | 0.212268369  | 0.778088784 | 1.78130063  | 0.024337373 |
| sp Q95865 DDAH2_HUMAN     | 4  | 40 | 76 | 33 | 0.063922 | 0.006279683  | 0.294570315  | -0.057642321 | 0.230648311  | 0.288290632  | 0.656092513 | 0.011493539 | 0.000195882 |
| sp P05787 K2CB_HUMAN      | 1  | 26 | 48 | 22 | -0.46726 | -0.414624151 | 0.286428484  | 0.053046227  | 0.754098905  | 0.701052635  | 0.955367795 | 0.002491131 | 0.001483803 |
| sp O15904 VAS1_HUMAN      | 23 | 40 | 76 | 33 | -0.17864 | -0.173884257 | 0.319730926  | 0.004752342  | 0.498367525  | 0.493651583  | 0.998157688 | 4.09E-06    | 2.69E-07    |
| sp P11711 A1_HUMAN        | 1  | 4  | 7  | 3  | 0.240321 | 0.153907004  | 0.110893928  | -0.086413808 | 0.770573115  | 0.856986924  | 0.975397779 | 0.303655536 | 0.17983569  |
| sp P98088 MUC5A_HUMAN     | 2  | 14 | 27 | 13 | 0.439153 | 0.028635008  | 0.392929441  | -0.410517681 | -0.046223249 | 0.364294432  | 0.19968474  | 0.984616808 | 0.29564433  |
| sp A0A087WSY4 HV432_HUMAN | 4  | 10 | 20 | 10 | 0.253084 | 0.426128387  | 0.247490202  | 0.173004472  | -0.005593712 | -0.178638185 | 0.566196697 | 0.999546395 | 0.548500339 |
| sp P16870 CBP_HUMAN       | 1  | 26 | 48 | 21 | 0.187372 | 0.114615157  | 0.044441712  | -0.07275648  | -0.142929924 | -0.070173444 | 0.517109163 | 0.177964889 | 0.587180788 |
| sp Q9Y333 LSM2_HUMAN      | 1  | 4  | 7  | 3  | -0.0273  | -0.121016424 | -0.314292636 | -0.093712166 | -0.286988379 | -0.193276213 | 0.541131894 | 0.047439441 | 0.149518982 |
| sp Q9Y5X9 LPE_HUMAN       | 4  | 40 | 76 | 33 | 0.038051 | 0.089028048  | 0.187108885  | 0.050976707  | 0.149057544  | 0.098080836  | 0.603166251 | 0.054527749 | 0.197120888 |
| sp Q9H074 PAIP1_HUMAN     | 2  | 7  | 14 | 6  | 0.00794  | 0.040751685  | 0.042811494  | 0.03281198   | 0.034871789  | 0.002059809  | 0.972774904 | 0.978641435 | 0.999901982 |
| sp P12104 FABP1_HUMAN     | 1  | 14 | 28 | 13 | -0.11999 | -0.0784638   | 0.245261618  | 0.041523463  | 0.365249449  | 0.323725987  | 0.97888151  | 0.312943704 | 0.30092847  |
| sp Q9P0V9 SEP10_HUMAN     | 3  | 7  | 14 | 6  | 0.193961 | -0.109119668 | 0.598734959  | -0.30380414  | 0.404774214  | 0.707854627  | 0.695962885 | 0.604267823 | 0.187251835 |
| sp Q00148 DX39A_HUMAN     | 5  | 12 | 21 | 9  | -0.81573 | -0.326188301 | 0.156138888  | 0.489537491  | 0.971864629  | 0.482327189  | 0.09595356  | 0.03526441  | 0.14930763  |
| sp P28906 CD34_HUMAN      | 3  | 40 | 76 | 33 | -0.09972 | -0.115130639 | 0.034551482  | -0.011810671 | 0.13427145   | 0.14608217   | 0.98187378  | 0.201070056 | 0.091055712 |
| sp P54922 ADPRH_HUMAN     | 2  | 4  | 7  | 3  | 0.122534 | 0.099215275  | 0.282498314  | -0.023318572 | 0.162449467  | 0.185768038  | 0.983122496 | 0.588806934 | 0.438401028 |
| sp Q43583 DENR_HUMAN      | 4  | 24 | 48 | 22 | -0.18226 | -0.015505176 | 0.314480627  | 0.197765666  | 0.496741117  | 0.298975451  | 0.202058244 | 0.001193694 | 0.034753179 |
| sp Q6XQNG PNCB_HUMAN      | 1  | 40 | 76 | 33 | -0.35458 | -0.168040609 | 0.137722324  | 0.186536074  | 0.492299006  | 0.305762933  | 0.065782824 | 6.28E-06    | 0.002026157 |
| sp P25398 RS12_HUMAN      | 7  | 4  | 7  | 3  | -0.25928 | -0.096883918 | 0.267503284  | 0.162397376  | 0.526784578  | 0.364387202  | 0.716901936 | 0.134855744 | 0.282743816 |
| sp P20340 RAB6A_HUMAN     | 9  | 37 | 69 | 30 | -0.17152 | -0.148948655 | 0.331051771  | 0.022571911  | 0.502572247  | 0.480000336  | 0.971055831 | 0.000111964 | 3.21E-05    |
| sp P06858 LIPU_HUMAN      | 8  | 40 | 76 | 33 | 0.050351 | 0.032164392  | -0.157889718 | -0.018186337 | -0.208240447 | -0.19005411  | 0.965271952 | 0.045219621 | 0.037787495 |
| sp P50560 XPO2_HUMAN      | 21 | 7  | 14 | 6  | 0.148309 | 0.103369985  | 0.282151354  | -0.044939176 | 0.133842193  | 0.178781369  | 0.957985449 | 0.700309553 | 0.550962821 |
| sp P50452 SPB8_HUMAN      | 1  | 37 | 69 | 30 | -0.35134 | -0.211629672 | 0.293067358  | 0.139707708  | 0.644404738  | 0.50469703   | 0.600726575 | 0.000905159 | 0.004208762 |
| sp P21583 SCF_HUMAN       | 3  | 21 | 41 | 17 | 0.756751 | 0.542652916  | 0.927765788  | -0.21409769  | 0.171015182  | 0.385112872  | 0.617544575 | 0.011378973 | 0.264388696 |
| sp P24534 EF1B_HUMAN      | 4  | 40 | 76 | 33 | -0.47684 | -0.316703467 | 0.109197656  | 0.160135498  | 0.58603662   | 0.425901123  | 0.470320336 | 0.80329403  | 0.011022668 |
| sp Q13232 NDR3_HUMAN      | 30 | 40 | 76 | 33 | 0.121649 | 0.082513522  | -0.038095376 | -0.039135572 | -0.15974447  | -0.120608898 | 0.479721193 | 0.000384058 | 0.002975653 |
| sp P02689 MYP2_HUMAN      | 10 | 40 | 76 | 33 | -0.2832  | -0.232588896 | 0.485465039  | 0.050616691  | 0.768664626  | 0.718053935  | 0.930221584 | 3.04E-05    | 1.07E-05    |
| sp Q02758 FABP9_HUMAN     | 2  | 11 | 20 | 9  | -0.29734 | -0.234922547 | 0.96848306   | 0.062417607  | 1.265823213  | 1.203405607  | 0.980472441 | 0.007667031 | 0.004397898 |
| sp P62834 RAP1A_HUMAN     | 6  | 40 | 76 | 33 | -0.23503 | -0.164734832 | 0.064817668  | 0.070296526  | 0.280849027  | 0.210552501  | 0.727275913 | 0.03478392  | 0.08604017  |
| sp P63244 RACK1_HUMAN     | 2  | 4  | 7  | 3  | -0.42716 | -0.069932186 | 0.354885039  | 0.357230297  | 0.782047523  | 0.424817225  | 0.531489907 | 0.162505556 | 0.46186809  |
| sp Q98E55 SPEF_HUMAN      | 6  | 7  | 14 | 6  | -0.2777  | 0.17275587   | 0.769636249  | 0.450457794  | 1.047338173  | 0.956880379  | 0.695707411 | 0.23246859  | 0.586777109 |
| sp P78536 ADA17_HUMAN     | 1  | 40 | 76 | 33 | -0.01003 | 0.076760173  | 0.223541431  | 0.086785347  | 0.233566605  | 0.146781258  | 0.182707965 | 0.000340867 | 0.015557653 |
| sp P07949 RET_HUMAN       | 24 | 37 | 69 | 30 | 0.017881 | 0.185285239  | 0.073156426  | 0.167404020  | -0.091037641 | -0.258441666 | 0.023899623 | 0.456287403 | 0.000590968 |
| sp P35052 GPC1_HUMAN      | 27 | 40 | 76 | 33 | -0.05469 | -0.072020495 | 0.191410657  | -0.017328459 | 0.246102693  | 0.263431152  | 0.957070784 | 0.003150625 | 0.000273271 |
| sp P19256 LFA3_HUMAN      | 3  | 40 | 76 | 33 | 0.051751 | -0.013974755 | -0.18264458  | -0.065725401 | -0.234315004 | -0.168589703 | 0.183539916 | 1.77E-06    | 0.000116408 |
| sp Q46148 GXL1L_HUMAN     | 1  | 40 | 76 | 33 | 0.153968 | 0.153438936  | 0.174100761  | -0.000529438 | 0.020132377  | 0.020661825  | 0.999952171 | 0.95342580  | 0.930875543 |
| sp Q7X73 TAOK1_HUMAN      | 4  | 7  | 14 | 6  | 0.330722 | -0.082525294 | 0.922729034  | 0.151803305  | 0.592007045  | 0.44020374   | 0.905686451 | 0.367594342 | 0.48268623  |
| sp P07437 TBB5_HUMAN      | 5  | 40 | 76 | 33 | -0.29108 | -0.495547128 | 0.155762854  | 0.195376382  | 0.446847664  | 0.251309982  | 0.138692206 | 0.01008436  | 0.057413859 |
| sp Q14194 DPY1L_HUMAN     | 8  | 36 | 69 | 30 | 0.059386 | 0.009300495  | 0.248542834  | -0.050085167 | 0.189157172  | 0.239242339  | 0.757668432 | 0.069553715 | 0.005078289 |
| sp P41159 LEP_HUMAN       | 5  | 40 | 76 | 33 | -0.17024 | -0.190483817 | -0.136163532 | -0.020242587 | 0.034077699  | 0.054320285  | 0.985811921 | 0.972448161 | 0.91363889  |
| sp Q99729 ROAA_HUMAN      | 9  | 7  | 13 | 6  | -0.26929 | -0.089471488 | 0.761459927  | 0.179817496  | 1.03074891   | 0.850931414  | 0.932459934 | 0.218225942 | 0.264370881 |
| sp Q92962 NECT2_HUMAN     | 1  | 40 | 76 | 33 | -0.3775  | -            |              |              |              |              |             |             |             |

|                        |     |    |    |    |          |                |              |              |              |              |             |             |             |
|------------------------|-----|----|----|----|----------|----------------|--------------|--------------|--------------|--------------|-------------|-------------|-------------|
| sp P28908 TNR8_HUMAN   | 1   | 28 | 55 | 24 | -1.40294 | -1.280843284   | -1.033095939 | 0.122097474  | 0.369844819  | 0.247747345  | 0.810926794 | 0.26724214  | 0.462449593 |
| sp Q96EE4 CC126_HUMAN  | 144 | 40 | 76 | 3  | 0.136424 | 0.098313797    | -0.90093372  | -0.038109921 | -0.22651709  | -0.188407169 | 0.515207228 | 6.73E-07    | 3.12E-06    |
| sp A8K714 CLCA1_HUMAN  | 1   | 6  | 14 | 7  | -0.63532 | -0.51505159    | 0.974348601  | 0.104271821  | 1.609670582  | 1.505398761  | 0.978346526 | 0.032364525 | 0.015222711 |
| sp P06053 CDC42_HUMAN  | 2   | 15 | 27 | 12 | -0.18245 | -0.040959437   | 0.301947681  | 0.133389121  | 0.484396239  | 0.351007118  | 0.553164422 | 0.007544128 | 0.036320511 |
| sp Q964I2 TXD15_HUMAN  | 1   | 40 | 76 | 33 | -0.15576 | -0.018460151   | 1.26452743   | 0.174218947  | 0.282211539  | 0.107992592  | 0.004245218 | 7.36E-05    | 0.18120644  |
| sp Q13501 SQSTM1_HUMAN | 2   | 4  | 6  | 3  | 0.070055 | -0.037992803   | 0.911238278  | -0.108047348 | 0.841183732  | 0.94923108   | 0.988553433 | 0.622053197 | 0.501870458 |
| sp Q9NP90 PPA6_HUMAN   | 1   | 16 | 27 | 11 | 0.330865 | 0.204190784    | 0.407567076  | -0.126674481 | 0.07670181   | 0.203376291  | 0.367727761 | 0.784853505 | 0.140631133 |
| sp Q43157 PLXB1_HUMAN  | 38  | 40 | 76 | 33 | 0.03774  | 0.015772358    | 0.080989096  | -0.021967908 | 0.043257893  | 0.065225738  | 0.710792297 | 0.003981111 | 0.075697922 |
| sp Q15651 HMGGN3_HUMAN | 11  | 32 | 62 | 27 | -1.6746  | -1.0864385     | -0.210477739 | 0.58775848   | 1.46412424   | 0.876365761  | 0.036171068 | 2.59E-06    | 0.001744711 |
| sp Q98X01 C1Q75_HUMAN  | 1   | 36 | 69 | 30 | 0.080929 | 0.158336885    | -0.038312601 | 0.077407983  | -0.119241503 | -0.196649486 | 0.230541195 | 0.092183865 | 0.00040061  |
| sp P01040 CYTA_HUMAN   | 10  | 36 | 69 | 30 | -0.46683 | -0.491230635   | 0.103229925  | -0.024401802 | 0.570058758  | 0.594460561  | 0.98831096  | 0.014471541 | 0.00305941  |
| sp Q98UN1 MENT_HUMAN   | 4   | 40 | 76 | 33 | 0.120761 | 0.088740262    | 0.191085811  | -0.032020993 | 0.070324556  | 0.102345549  | 0.74522464  | 0.378463408 | 0.076134035 |
| sp P52943 CRIP2_HUMAN  | 5   | 4  | 7  | 3  | 0.524771 | 0.371857787    | 0.580871854  | -0.152912727 | 0.05610134   | 0.209014067  | 0.859773166 | 0.986218737 | 0.3976535   |
| sp Q56U05 TPT11_HUMAN  | 4   | 36 | 69 | 30 | -0.25663 | -0.058015356   | 0.220930261  | 0.198611154  | 0.477556771  | 0.278945617  | 0.262819642 | 0.005928939 | 0.099785969 |
| sp Q14141 SEPT6_HUMAN  | 2   | 40 | 76 | 33 | -0.34321 | -0.288948985   | 0.053707734  | 0.054258038  | 0.396914757  | 0.342656719  | 0.929424734 | 0.072018598 | 0.082218338 |
| sp Q81YD1 ERF3B_HUMAN  | 1   | 26 | 48 | 21 | -0.0981  | -0.014115959   | 0.392806748  | 0.083986606  | 0.490909313  | 0.406922707  | 0.793191441 | 0.006177283 | 0.011056212 |
| sp Q81Y51 OSCAR_HUMAN  | 3   | 40 | 76 | 33 | -0.04516 | 0.027223103    | 0.116197968  | 0.072388011  | 0.161362876  | 0.088974865  | 0.482610028 | 0.08601559  | 0.381377437 |
| sp P01718 LV327_HUMAN  | 12  | 4  | 6  | 3  | -0.14266 | -0.064339321   | 0.415846864  | 0.078323356  | 0.558509541  | 0.480186185  | 0.960393426 | 0.276365179 | 0.32664087  |
| sp Q9GZ78 JMUP_HUMAN   | 1   | 40 | 76 | 33 | -0.18146 | -0.264193446   | -0.353706646 | -0.082733285 | -0.172246485 | -0.0895132   | 0.879252825 | 0.812636561 | 0.876119999 |
| sp Q16663 CCL15_HUMAN  | 1   | 40 | 76 | 33 | -0.10087 | -0.178758274   | 0.232576473  | -0.07789277  | 0.333441976  | 0.411334746  | 0.480499964 | 0.001088968 | 1.68E-07    |
| sp P02810 PRP_C_HUMAN  | 2   | 28 | 55 | 25 | -0.44879 | -0.594497344   | 0.053387662  | -0.145709331 | 0.502175676  | 0.647885007  | 0.757032963 | 0.100188922 | 0.008171616 |
| sp P15151 PVR_HUMAN    | 8   | 40 | 76 | 33 | -0.00798 | 0.02325285     | 0.101496564  | 0.031229861  | 0.109473575  | 0.078243714  | 0.737117325 | 0.079942039 | 0.190677675 |
| sp Q56U05 TPT11_HUMAN  | 1   | 15 | 28 | 12 | -0.07669 | -0.125897201   | -0.121519094 | -0.049208242 | -0.044830134 | 0.004378107  | 0.956076926 | 0.999683953 | 0.099693953 |
| sp Q9H902 CSN7B_HUMAN  | 7   | 19 | 34 | 15 | -0.29338 | -0.099228455   | 0.286818651  | 0.194152366  | 0.580199472  | 0.386047106  | 0.455494413 | 0.011081588 | 0.076810214 |
| sp Q8NH61 LUR4_HUMAN   | 1   | 7  | 14 | 6  | -0.65539 | -0.768523358   | 0.17477274   | -0.11330907  | 0.830165191  | 0.943296098  | 0.963945015 | 0.027465095 | 0.075828962 |
| sp Q9HAT2 SIAE_HUMAN   | 2   | 40 | 76 | 33 | -0.15295 | -0.170256283   | 0.18534697   | -0.017305889 | 0.338294091  | 0.35559998   | 0.963213198 | 0.00101899  | 4.40E-06    |
| sp P15813 CD1D_HUMAN   | 12  | 18 | 35 | 15 | 0.139167 | 0.092063481    | -0.091578348 | -0.047103763 | -0.230745592 | -0.183641829 | 0.905705533 | 0.203969336 | 0.272691936 |
| sp Q49901 MCSF_HUMAN   | 1   | 4  | 6  | 3  | 0.311945 | 0.242975725    | 0.105745752  | -0.06899103  | -0.206199076 | -0.137229973 | 0.906280521 | 0.55091132  | 0.728126075 |
| sp Q9H441 CCD39_HUMAN  | 2   | 29 | 55 | 24 | 0.716525 | 0.290763536    | 0.065459297  | -0.425761314 | -0.781984147 | -0.356222833 | 0.163217562 | 0.01476283  | 0.024049603 |
| sp Q14012 KCC1A_HUMAN  | 1   | 21 | 42 | 19 | 0.015884 | -0.048406691   | 0.258961231  | -0.064291128 | 0.243076794  | 0.307367922  | 0.897797438 | 0.339387256 | 0.108153751 |
| sp P05114 HMGNI_HUMAN  | 5   | 32 | 62 | 27 | -0.70507 | -0.55342206    | 0.074229123  | 0.151650215  | 0.779301398  | 0.627651183  | 0.606877747 | 0.000235346 | 0.000858074 |
| sp Q96115 SCLY_HUMAN   | 1   | 22 | 41 | 17 | -0.15616 | -0.064761868   | 0.230662711  | 0.212921998  | 0.386822841  | 0.173900843  | 0.262973121 | 0.002562207 | 0.469944193 |
| sp Q06268 K0513_HUMAN  | 5   | 8  | 14 | 6  | -0.07693 | -0.08879441    | -0.01610933  | 0.165727132  | 0.060823392  | -0.10490374  | 0.718953644 | 0.970125104 | 0.895713804 |
| sp Q9Y383 TMED7_HUMAN  | 6   | 22 | 41 | 18 | -0.08389 | -0.318362588   | 0.086869747  | -0.234475064 | 0.17257727   | 0.407052334  | 0.172824828 | 0.005972863 | 0.01656379  |
| sp Q8NBK3 SUMF1_HUMAN  | 15  | 20 | 34 | 14 | -0.07795 | 0.07589907     | 0.55646583   | 0.15384786   | 0.634413784  | 0.480565923  | 0.312000451 | 1.97E-05    | 0.000372067 |
| sp Q50862 FILA2_HUMAN  | 4   | 11 | 21 | 9  | -0.16787 | 0.20971179     | -0.330389769 | 0.377582782  | -0.162524178 | -0.54010696  | 0.07212482  | 0.699248625 | 0.017124782 |
| sp Q81UI8 CRLF3_HUMAN  | 3   | 37 | 69 | 29 | -0.26255 | -0.235425799   | 0.240359578  | 0.020712739  | 0.502913117  | 0.475785377  | 0.982629869 | 0.020369603 | 0.012838848 |
| sp Q9UKJ1 PIIRA_HUMAN  | 5   | 40 | 76 | 33 | -0.37394 | -0.253921807   | 0.426045751  | 0.120015119  | 0.799982687  | 0.679967558  | 0.459467106 | 2.09E-09    | 0.000170669 |
| sp Q43768 ENSA_HUMAN   | 2   | 22 | 41 | 18 | -0.32206 | -0.223877816   | 0.645821444  | 0.0981865    | 0.967885761  | 0.869699261  | 0.903439209 | 0.002063919 | 0.00184282  |
| sp P61586 RHOA_HUMAN   | 2   | 26 | 48 | 20 | -0.09993 | -0.088540054   | -0.15726956  | 0.011392601  | -0.057336906 | -0.068729507 | 0.995813964 | 0.931323581 | 0.880235118 |
| sp P04729 SEMG1_HUMAN  | 7   | 6  | 14 | 7  | -0.23925 | -0.195205927   | 0.886845472  | 0.040443007  | 0.110789407  | 1.0638514    | 0.993547275 | 0.062384655 | 0.028359458 |
| sp Q5TJ15 CHCH9_HUMAN  | 8   | 4  | 6  | 3  | -0.5975  | 0.03690491     | 0.348739294  | 0.634406826  | 0.84624121   | 0.311834384  | 0.338993969 | 0.197545014 | 0.788044813 |
| sp Q9NRX4 PHP14_HUMAN  | 1   | 40 | 76 | 33 | -0.4211  | -0.180946166   | 0.418703785  | 0.240149446  | 0.839799398  | 0.599649952  | 0.0461653   | 3.01E-10    | 2.87E-07    |
| sp Q9Y219 JAG2_HUMAN   | 1   | 32 | 62 | 27 | 0.033829 | 0.036752172    | 0.009623236  | 0.002922717  | -0.052261691 | -0.055184408 | 0.998533805 | 0.723100936 | 0.629079833 |
| sp Q96N07 HUTI_HUMAN   | 10  | 26 | 49 | 21 | -0.23839 | -0.102813886   | -0.293379751 | 0.13557454   | 0.531768178  | 0.396193637  | 0.584459933 | 0.005972863 | 0.022614492 |
| sp P15941 MUC1_HUMAN   | 4   | 40 | 76 | 33 | -0.14284 | -0.066244195   | 0.430883373  | 0.076590304  | 0.573723601  | 0.497127568  | 0.535071588 | 1.65E-09    | 3.60E-09    |
| sp P22694 KAPCB_HUMAN  | 1   | 37 | 69 | 29 | -0.18444 | -0.181224796   | 0.171642573  | 0.003210613  | 0.35607794   | 0.352867369  | 0.999661344 | 0.065376483 | 0.035377089 |
| sp Q9UNN5 FAF1_HUMAN   | 2   | 4  | 7  | 3  | 0.241218 | 0.3214835      | 0.01139401   | 0.080265061  | -0.229824429 | -0.31008949  | 0.942751131 | 0.727933942 | 0.504790556 |
| sp Q14246 AGRE1_HUMAN  | 7   | 14 | 28 | 12 | 0.014539 | 0.000212575    | 0.01168524   | -0.014326317 | -0.002853623 | 0.011472664  | 0.995097094 | 0.999895061 | 0.917768653 |
| sp Q16134 ETFD_HUMAN   | 17  | 4  | 7  | 3  | 0.4642   | 0.466940077    | 1.596062405  | 0.002739682  | 0.13186201   | 1.129122328  | 0.999979418 | 0.141441064 | 0.099073428 |
| sp P01037 CYTN_HUMAN   | 3   | 14 | 27 | 13 | 0.562539 | 0.306884798    | 0.148744331  | 0.220115759  | -0.413794919 | -0.158140467 | 0.782852978 | 0.627209619 | 0.914404338 |
| sp Q43915 VEGFD_HUMAN  | 6   | 36 | 69 | 30 | -0.08733 | -0.058279255   | 0.02208694   | 0.029055112  | 0.109421308  | 0.080366196  | 0.878460971 | 0.285044459 | 0.419411024 |
| sp Q9Y281 PRG3_HUMAN   | 2   | 32 | 62 | 27 | -0.01522 | -0.002448586   | 0.098829087  | 0.012775708  | 0.114053381  | 0.101277673  | 0.981036038 | 0.351534512 | 0.346928299 |
| sp Q50T21 ISK9_HUMAN   | 6   | 11 | 20 | 9  | -0.12733 | -0.058137703   | -0.071762629 | 0.069197129  | 0.109662030  | 0.040465074  | 0.865555802 | 0.777178517 | 0.957605899 |
| sp Q76009 KT3A3_HUMAN  | 7   | 4  | 6  | 3  | -0.19751 | 0.664105537    | -0.080742209 | 0.861612305  | 0.116764559  | -0.744847746 | 0.525675183 | 0.991022033 | 0.663341465 |
| sp Q9HC0U CD248_HUMAN  | 18  | 40 | 76 | 33 | -0.0002  | -0.030364394   | 0.393737772  | -0.03016076  | 0.393941406  | 0.424102166  | 0.877850474 | 1.39E-06    | 5.69E-09    |
| sp P11150 LIPC_HUMAN   | 3   | 40 | 76 | 33 | 0.140667 | 0.027104502    | 0.009627512  | -0.113562413 | -0.131039403 | -0.01747699  | 0.210127469 | 0.238097765 | 0.967568088 |
| sp P17096 HMGAI1_HUMAN | 2   | 4  | 6  | 3  | 0.208939 | 0.310374722    | 0.800173869  | 0.101436     | 0.591235147  | 0.489799147  | 0.959254668 | 0.934724801 | 0.472348081 |
| sp Q27811 INF2_HUMAN   | 6   | 14 | 28 | 12 | -0.48449 | -0.349250819   | 0.407247383  | 0.135241729  | 0.891739931  | 0.756498202  | 0.868232116 | 0.020302989 | 0.025592772 |
| sp Q01523 DEF5_HUMAN   | 81  | 4  | 6  | 3  | 0.322419 | 0.1931226185   | 0.970586004  | 0.608806819  | -0.351833362 | -0.960640181 | 0.363942044 | 0.702023383 | 0.140895016 |
| sp Q6UXH0 JANGLB_HUMAN | 4   | 40 | 76 | 33 | 0.144854 | 0.162025734    | 0.24073041   | 0.017171563  | 0.095876239  | 0.078704676  | 0.976110505 | 0.596090325 | 0.6144779   |
| sp Q93033 IGSF2_HUMAN  | 1   | 16 | 27 | 11 | 0.27692  | 0.274101443    | 0.4041542808 | -0.002818529 | -0.235377194 | -0.232558635 | 0.999740421 | 0.927293436 | 0.263417243 |
| sp Q715N1 CSN6_HUMAN   | 1   | 33 | 62 | 27 | -0.24693 | -0.043298241   | 0.055174976  | 0.203629618  | 0.652102836  | 0.448473217  | 0.235599008 | 8.74E-05    | 0.00296798  |
| sp Q5VWZ2 LYPL1_HUMAN  | 12  | 10 | 21 | 9  | 0.000923 | -0.009496067   | 0.828541377  | -0.010419218 | 0.827618215  | 0.838037444  | 0.998441555 | 0.003144051 | 0.000576599 |
| sp Q9U9F1 GAK1A_HUMAN  | 1   | 36 | 69 | 30 | 0.060747 | 0.024583149    | -0.02958574  | -0.036164346 | -0.083706069 | -0.047541723 | 0.885167174 | 0.63742252  | 0.830127223 |
| sp P22102 PUR2_HUMAN   | 15  | 9  | 21 | 10 | -0.02196 | -0.057476229</ |              |              |              |              |             |             |             |

|                         |     |    |    |    |          |               |              |              |               |              |             |             |             |
|-------------------------|-----|----|----|----|----------|---------------|--------------|--------------|---------------|--------------|-------------|-------------|-------------|
| sp P25325 THMT_HUMAN    | 13  | 40 | 76 | 33 | -0.1187  | -0.081945974  | 0.148530866  | 0.036758473  | 0.267235313   | 0.23047684   | 0.887620141 | 0.015469346 | 0.019171997 |
| sp Q9H299 SH3L3_HUMAN   | 4   | 40 | 76 | 33 | -0.03527 | -0.153845103  | 0.276733707  | -0.118571652 | 0.312007158   | 0.43057881   | 0.692050032 | 0.176657105 | 0.016564093 |
| sp Q16555 DPYL2_HUMAN   | 17  | 40 | 76 | 33 | -0.20666 | -0.152545816  | 0.109090895  | 0.051411814  | 0.315748526   | 0.264336711  | 0.83819436  | 0.102306134 | 0.019449545 |
| sp P55805 SCOT1_HUMAN   | 4   | 4  | 6  | 3  | 0.045647 | 0.416956691   | 0.286668257  | 0.371308713  | 0.241021278   | -0.130287435 | 0.335819998 | 0.701088408 | 0.883427888 |
| sp Q13609 DNL3L1_HUMAN  | 1   | 16 | 27 | 11 | -0.22162 | -0.219136392  | 0.139085379  | 0.002483629  | 0.360705399   | 0.358221769  | 0.999888772 | 0.22977162  | 0.17751223  |
| sp P80748 LV321_HUMAN   | 1   | 4  | 7  | 3  | -0.01278 | -0.048879932  | 0.171272339  | -0.036099994 | 0.184052278   | 0.220152272  | 0.948317902 | 0.423341452 | 0.240359199 |
| sp Q9BR82 TXD17_HUMAN   | 16  | 40 | 76 | 33 | -0.36837 | -0.175098772  | 0.259481933  | 0.193269976  | 0.62785068    | 0.434580705  | 0.142926135 | 2.82E-06    | 0.000295688 |
| sp Q969H8 MYDGF_HUMAN   | 6   | 40 | 76 | 33 | -0.28814 | -0.247123392  | 0.33946372   | 0.040923803  | 0.627660914   | 0.586677112  | 0.921692863 | 7.46E-06    | 0.29E-06    |
| sp Q13347 EIF1_HUMAN    | 5   | 4  | 7  | 3  | -0.27312 | -0.139066389  | -0.37814624  | 0.134049688  | -0.105030164  | -0.239079852 | 0.901574651 | 0.957828816 | 0.765161405 |
| sp Q5BLP8 CDO4B_HUMAN   | 2   | 14 | 28 | 13 | -0.00959 | -0.018077273  | -0.002498604 | -0.008489364 | 0.007089305   | 0.015578669  | 0.997877283 | 0.99839306  | 0.993217023 |
| sp P51148 RAB5C_HUMAN   | 49  | 4  | 7  | 3  | 0.358012 | 0.05685159    | 0.311064206  | -0.301160153 | -0.046947537  | 0.254212616  | 0.482055136 | 0.987287373 | 0.643358772 |
| sp P48595 SPB10_HUMAN   | 9   | 10 | 20 | 10 | -0.30398 | -0.259496144  | 0.529644748  | 0.044484318  | 0.833625211   | 0.789140893  | 0.990843667 | 0.10437489  | 0.060501631 |
| sp Q00839 HNRPU_HUMAN   | 2   | 10 | 21 | 9  | 0.182851 | 0.4357232     | 1.179890237  | 0.252872414  | 0.997039451   | 0.744167037  | 0.76728715  | 0.069044871 | 0.123563123 |
| sp Q14933 UB2L1_HUMAN   | 6   | 10 | 21 | 6  | -0.14757 | 0.103092736   | 0.505602146  | -0.25066726  | 0.653176671   | 0.40250941   | 0.47545678  | 0.032201345 | 0.156640197 |
| sp P04632 CPNS1_HUMAN   | 31  | 40 | 76 | 33 | -0.10255 | -0.142488859  | 0.438305     | 0.039938791  | 0.335754932   | 0.295816141  | 0.823809468 | 0.000169087 | 0.000186594 |
| sp P26599 PTBP1_HUMAN   | 4   | 17 | 35 | 16 | -0.25893 | -0.111179936  | 0.374083776  | 0.147752001  | 0.633015713   | 0.485263712  | 0.561144311 | 0.001114185 | 0.004269742 |
| sp Q75752 B3GL1_HUMAN   | 5   | 40 | 76 | 33 | 0.073452 | 0.011457971   | -0.03545984  | -0.061993535 | -0.108911346  | -0.046917811 | 0.226230619 | 0.044500216 | 0.470865714 |
| sp P61956 SUMO2_HUMAN   | 9   | 22 | 42 | 17 | -0.15649 | -0.157442471  | 0.565818785  | -0.000947484 | 0.722312861   | 0.723260346  | 0.999977062 | 0.000405688 | 6.70E-05    |
| sp Q6VE6 SUMO4_HUMAN    | 2   | 22 | 41 | 19 | 0.023354 | 0.095200643   | 0.314207986  | -0.118554339 | 0.29085349    | 0.409408629  | 0.712351124 | 0.239807025 | 0.030643445 |
| sp A40D05 LAMB4_HUMAN   | 12  | 32 | 63 | 28 | 0.009813 | 0.018959242   | 0.129994932  | 0.008779429  | 0.120181938   | 0.11140251   | 0.981292483 | 0.088695984 | 0.067879467 |
| sp Q8NF23 NLGN4_HUMAN   | 26  | 14 | 28 | 13 | 0.038224 | 0.095512178   | 0.208005526  | 0.057288509  | -0.017418143  | -0.074706652 | 0.80680331  | 0.985644653 | 0.360853878 |
| sp P10747 CD28_HUMAN    | 13  | 8  | 13 | 5  | -0.15554 | 0.028721999   | -0.111763353 | 0.184259833  | 0.043774481   | -0.140485353 | 0.922280153 | 0.99715644  | 0.966214465 |
| sp P99999 CVC_HUMAN     | 2   | 40 | 76 | 33 | -0.08774 | -0.034583976  | 0.063751641  | 0.05416066   | 0.151496277   | 0.097335616  | 0.696332691 | 0.14631194  | 0.36088883  |
| sp Q96V72 SCRN2_HUMAN   | 1   | 36 | 70 | 30 | 0.060396 | 0.0155055     | 0.121877653  | -0.044890734 | 0.061481419   | 0.106372153  | 0.834933177 | 0.79232775  | 0.411626117 |
| sp P50225 ST1A1_HUMAN   | 3   | 33 | 62 | 27 | -0.08085 | -0.16570238   | 0.164073907  | -0.08484838  | 0.244927907   | 0.329776287  | 0.849028988 | 0.393937602 | 0.121366193 |
| sp P46782 R55_HUMAN     | 1   | 4  | 6  | 3  | -0.46447 | -0.355664474  | 0.152327912  | 0.108805015  | 0.616797402   | 0.507992387  | 0.955922757 | 0.390160488 | 0.467947553 |
| sp P15586 GNS_HUMAN     | 1   | 19 | 35 | 15 | -0.00226 | 0.006826454   | 0.314651557  | 0.009084257  | 0.316909361   | 0.307825103  | 0.993853893 | 0.00928011  | 0.004281917 |
| sp P26022 PTX3_HUMAN    | 11  | 40 | 76 | 33 | -0.58731 | -0.433677554  | 0.056334212  | 0.153636509  | 0.643648275   | 0.490011765  | 0.367598844 | 1.67E-05    | 0.000245288 |
| sp Q00161 SNRP2_HUMAN   | 6   | 36 | 69 | 30 | -0.31989 | -0.236309712  | 0.162291629  | 0.083582534  | 0.336183876   | 0.252601341  | 0.750812307 | 0.04470294  | 0.104060152 |
| sp Q9NTN9 SEMA6_HUMAN   | 8   | 40 | 76 | 33 | 0.036519 | 0.049291555   | -0.02180108  | 0.012773234  | -0.058329411  | -0.071101735 | 0.971199161 | 0.657842084 | 0.454425074 |
| sp P43487 RANG_HUMAN    | 4   | 40 | 76 | 33 | -0.25099 | -0.105716858  | 0.221041294  | 0.145277696  | 0.472035848   | 0.326758152  | 0.339299218 | 0.000615753 | 0.009757017 |
| sp P46940 IQGAP1_HUMAN  | 2   | 22 | 41 | 18 | 0.200983 | 0.234579474   | 0.54423006   | 0.033596471  | 0.343247057   | 0.309650585  | 0.974086373 | 0.158990123 | 0.015177209 |
| sp P40939 ECHA_HUMAN    | 4   | 4  | 7  | 3  | 0.055732 | 0.024483338   | 1.456445463  | -0.031249079 | 1.398913046   | 1.430162125  | 0.998845773 | 0.255119743 | 0.183865829 |
| sp Q86W64 OSTM1_HUMAN   | 9   | 19 | 35 | 14 | 0.017595 | 0.034551344   | -0.237799677 | 0.016956141  | -0.25139488   | -0.268351021 | 0.952801252 | 0.900256831 | 0.000221997 |
| sp Q9H36K COL2_HUMAN    | 5   | 33 | 62 | 28 | -0.37312 | -0.084623399  | 0.306301076  | 0.288494010  | 0.679418486   | 0.390924475  | 0.011626586 | 1.94E-07    | 0.008166341 |
| sp P04118 BOL_COL_HUMAN | 1   | 10 | 21 | 6  | -0.22249 | -0.264784514  | 0.449669433  | -0.042294953 | 0.672158994   | 0.714453947  | 0.985961118 | 0.101740271 | 0.047561324 |
| sp Q16849 PTPRN_HUMAN   | 2   | 7  | 13 | 6  | 0.190037 | 0.057385284   | 0.541828534  | -0.13265183  | 0.351791421   | 0.484443225  | 0.895347461 | 0.58226446  | 0.283680677 |
| sp P09093 CEL3A_HUMAN   | 2   | 40 | 76 | 33 | -0.23224 | -0.148989679  | -0.032729791 | 0.083250296  | 0.199510184   | 0.116259888  | 0.707932008 | 0.152501915 | 0.285486395 |
| sp P45877 PPIC_HUMAN    | 12  | 40 | 76 | 33 | 0.171326 | 0.123114417   | 0.501590265  | -0.048211439 | 0.330264409   | 0.378475848  | 0.71025184  | 4.24E-05    | 1.15E-07    |
| sp Q96L96 ALPK3_HUMAN   | 4   | 4  | 6  | 3  | -0.18244 | -0.08912599   | 0.520849006  | 0.093318515  | 0.703293511   | 0.609974996  | 0.983724854 | 0.35567926  | 0.576757566 |
| sp Q13451 FKBP5_HUMAN   | 3   | 15 | 27 | 12 | -0.20583 | -0.379568045  | 0.316475863  | -0.173735891 | 0.523208017   | 0.696043908  | 0.725544439 | 0.145059292 | 0.01713505  |
| sp P62633 CNPB_HUMAN    | 2   | 7  | 14 | 6  | -0.89258 | -0.629965635  | 0.7354263    | 0.262162625  | 1.62800456    | 1.365391935  | 0.745014707 | 0.00245628  | 0.0036913   |
| sp P56537 IF6_HUMAN     | 2   | 7  | 14 | 6  | -0.3092  | -0.006061445  | 0.308480582  | 0.303138611  | 0.617680638   | 0.314542028  | 0.203235386 | 0.016870046 | 0.212832011 |
| sp Q35R99 FBLN7_HUMAN   | 6   | 40 | 76 | 33 | -0.03434 | -0.037057739  | 0.210527746  | -0.002722476 | 0.244863009   | 0.247585485  | 0.998170158 | 8.96E-05    | 7.13E-06    |
| sp P30530 UFO_HUMAN     | 27  | 40 | 76 | 33 | -0.00158 | -0.049391831  | 0.057477275  | -0.047812072 | 0.05905836    | 0.106869106  | 0.433099704 | 0.414548948 | 0.0281981   |
| sp Q9P292 RRBP1_HUMAN   | 7   | 18 | 34 | 16 | -0.44139 | -0.281903602  | 0.036041142  | 0.159482912  | 0.477427657   | 0.317944744  | 0.866799043 | 0.403094919 | 0.59367015  |
| sp P06576 ATPB_HUMAN    | 9   | 23 | 41 | 18 | 0.095552 | 0.065411266   | 0.148517364  | -0.030140688 | 0.05296541    | 0.083106098  | 0.948449816 | 0.984138104 | 0.711791549 |
| sp P26010 ITB7_HUMAN    | 2   | 11 | 20 | 9  | 0.157607 | 0.108662831   | 0.139464247  | -0.048943878 | -0.022660462  | 0.026283416  | 0.790114518 | 0.965187777 | 0.942006862 |
| sp P62805 H4_HUMAN      | 2   | 40 | 76 | 33 | -1.20159 | -1.109526427  | -0.052526677 | 0.092062822  | 1.146332572   | 1.05426975   | 0.896917338 | 0.26123202  | 0.00751531  |
| sp P48509 CD151_HUMAN   | 9   | 4  | 7  | 3  | -0.24169 | -0.178336558  | 0.726804751  | 0.063350376  | 0.968491684   | 0.905141308  | 0.993952626 | 0.41564359  | 0.392882774 |
| sp Q87CD5 NTSC4_HUMAN   | 20  | 24 | 41 | 17 | 0.047837 | 0.014953118   | 0.253818473  | -0.032883958 | 0.205981397   | 0.238865355  | 0.94707729  | 0.253486037 | 0.110906888 |
| sp P12123 PIP_HUMAN     | 8   | 33 | 62 | 27 | 0.071268 | 0.011478608   | 0.224463351  | -0.059789527 | -0.046804784  | 0.012984742  | 0.629936069 | 0.822084651 | 0.981042571 |
| sp Q8WUA8 TSK_HUMAN     | 22  | 40 | 76 | 33 | -0.18443 | -0.064286748  | 0.209268951  | 0.120143539  | 0.393699238   | 0.72355699   | 0.478118084 | 0.005392949 | 0.97474434  |
| sp Q95502 NPTXR_HUMAN   | 6   | 40 | 76 | 33 | 0.091742 | -0.00949521   | 0.296760231  | -0.101237373 | -0.388448294  | -0.287211021 | 0.208207822 | 7.13E-07    | 3.73E-05    |
| sp P55957 BID_HUMAN     | 10  | 11 | 21 | 10 | 0.133593 | 0.060789611   | 0.425385172  | -0.072803001 | 0.291792526   | 0.364595561  | 0.870170805 | 0.21128101  | 0.049413645 |
| sp Q9C005 DPY30_HUMAN   | 1   | 6  | 14 | 7  | 0.127547 | 0.207820997   | 1.034147794  | 0.080274192  | 0.906600989   | 0.826326797  | 0.960293955 | 0.033212007 | 0.018715778 |
| sp P06748 NPM_HUMAN     | 1   | 7  | 14 | 5  | -0.46682 | -0.05993851   | 0.75490102   | 0.39082472   | 1.221759573   | 0.830934853  | 0.710171805 | 0.144724843 | 0.309963645 |
| sp Q13741 MOG5_HUMAN    | 5   | 33 | 62 | 27 | 0.193169 | 0.193198039   | 0.154601638  | 2.86E-05     | -0.0385567834 | -0.038596401 | 0.999999807 | 0.784723745 | 0.735456304 |
| sp P55286 CADH8_HUMAN   | 7   | 4  | 7  | 3  | 0.009908 | 0.01672207    | 0.10685321   | 0.00681405   | 0.096945191   | 0.09013114   | 0.997739794 | 0.74096598  | 0.72837753  |
| sp P55327 TPD52_HUMAN   | 4   | 7  | 13 | 6  | 0.226879 | 0.180204597   | 0.475680872  | -0.046674415 | 0.248801861   | 0.295476276  | 0.97933454  | 0.661324544 | 0.81892845  |
| sp Q43939 TPD54_HUMAN   | 12  | 8  | 13 | 6  | -0.08002 | -0.123453465  | -0.315054974 | -0.043431613 | -0.235033122  | -0.191601509 | 0.965030352 | 0.49657308  | 0.570862605 |
| sp P01906 DQA2_HUMAN    | 1   | 28 | 56 | 25 | -0.21534 | -0.0906811587 | 0.051161036  | 0.154533359  | 0.266505981   | 0.111972623  | 0.535297102 | 0.276104102 | 0.737053522 |
| sp P48745 CCN3_HUMAN    | 104 | 40 | 76 | 33 | -0.31851 | -0.3465985    | 0.113357256  | -0.028085513 | 0.431870243   | 0.459955756  | 0.941384333 | 0.000121513 | 3.37E-06    |
| sp Q96Q01 PCD16_HUMAN   | 1   | 40 | 76 | 33 | 0.099528 | 0.096455524   | 0.115814269  | -0.003072044 | 0.016286701   | 0.019358745  | 0.995342826 | 0.91525048  | 0.850037814 |
| sp Q6NU11 SAPL1_HUMAN   | 8   | 4  | 7  | 3  | 0.025841 | 0.237705459   | -0.145265944 | 0.211865414  | -0.171106888  | -0.382971402 | 0.251795611 | 0.521867843 | 0.04401908  |
| sp P23237 SRC1_HUMAN    | 1   | 6  | 14 | 7  | 0.103588 | 0.074237      |              |              |               |              |             |             |             |

|                          |    |    |    |    |          |              |              |              |              |              |             |             |             |
|--------------------------|----|----|----|----|----------|--------------|--------------|--------------|--------------|--------------|-------------|-------------|-------------|
| sp P05198 IF2A_HUMAN     | 7  | 22 | 41 | 18 | -0.17859 | -0.009167412 | 0.357931344  | 0.169423474  | 0.53652223   | 0.367098756  | 0.610717495 | 0.038110174 | 0.138938898 |
| sp P34949 MPI_HUMAN      | 1  | 4  | 7  | 3  | -0.1131  | -0.250472743 | -0.040139379 | -0.13737361  | 0.072959754  | 0.210333364  | 0.795267782 | 0.096673489 | 0.647658235 |
| sp Q8NF28 CADM4_HUMAN    | 11 | 36 | 69 | 30 | 0.04587  | -0.051293499 | 0.23582418   | -0.097163701 | 0.189953977  | 0.287117678  | 0.403946618 | 0.954624458 | 0.00187606  |
| sp Q95841 ANGL1_HUMAN    | 11 | 10 | 21 | 10 | 0.050047 | 0.067156536  | 0.144482815  | 0.017109097  | 0.094435377  | 0.07732628   | 0.992817069 | 0.850996119 | 0.863611646 |
| sp P09529 INHBB_HUMAN    | 6  | 22 | 41 | 19 | 0.228148 | 0.288235175  | 0.480697629  | 0.060087566  | 0.252550106  | 0.192462454  | 0.788195986 | 0.056765832 | 0.116880227 |
| sp Q9NW8D TM248_HUMAN    | 2  | 18 | 34 | 14 | 0.093721 | 0.073397247  | 0.06525598   | -0.020323372 | -0.028464639 | -0.008141267 | 0.923183323 | 0.9004519   | 0.98923651  |
| sp Q5S919 MANEA_HUMAN    | 1  | 10 | 21 | 10 | -0.02344 | 0.060897981  | -0.024774389 | 0.084334404  | -0.001337965 | -0.08567237  | 0.629532422 | 0.999912816 | 0.620415483 |
| sp Q8NF30 MTURN_HUMAN    | 17 | 12 | 21 | 9  | 0.230112 | 0.067780489  | 0.239453181  | -0.16231556  | 0.209341135  | 0.371672691  | 0.7728131   | 0.125475063 | 0.37040492  |
| sp Q14166 TTL12_HUMAN    | 16 | 7  | 14 | 6  | -0.01864 | -0.123630846 | 0.276634385  | -0.10499252  | 0.295272979  | 0.400265231  | 0.869631624 | 0.057523261 | 0.182543195 |
| sp Q9H2M3 BHM2T_HUMAN    | 7  | 40 | 76 | 33 | -0.28342 | -0.083205643 | 0.226764714  | 0.200212251  | 0.510182807  | 0.309970356  | 0.199546524 | 0.00106374  | 0.335712115 |
| sp Q75791 GRAP2_HUMAN    | 7  | 29 | 56 | 24 | 0.013299 | -0.0701582   | -0.031560013 | -0.083457442 | -0.044859255 | 0.038598187  | 0.633018521 | 0.912793532 | 0.917203264 |
| sp Q9H0W9 CK054_HUMAN    | 10 | 12 | 21 | 9  | -0.45078 | -0.203385157 | 0.039945462  | 0.247397748  | 0.490728367  | 0.243330618  | 0.442675392 | 0.076585392 | 0.042668388 |
| sp Q14773 TPP1_HUMAN     | 1  | 40 | 76 | 33 | -0.01553 | 0.011994608  | 0.155537007  | 0.027521674  | 0.171064074  | 0.143542399  | 0.806218693 | 0.004326992 | 0.007427484 |
| sp Q96DR8 MUC1_HUMAN     | 1  | 10 | 21 | 9  | -0.02597 | 0.051085885  | -0.182140609 | 0.077050886  | -0.156175609 | -0.233226495 | 0.898374089 | 0.736402774 | 0.410148222 |
| sp P51124 GRAM_HUMAN     | 3  | 34 | 62 | 26 | 0.174636 | 0.198324812  | -0.01018267  | 0.023689821  | -0.184818202 | -0.208507482 | 0.887942425 | 0.01029589  | 0.000839865 |
| sp Q15020 SPTN2_HUMAN    | 7  | 7  | 14 | 6  | -0.25174 | -0.162781932 | 0.224862229  | 0.089857414  | 0.476601575  | 0.387644161  | 0.811105041 | 0.028307776 | 0.043796745 |
| sp A007556K4 LV310_HUMAN | 4  | 11 | 20 | 9  | -0.08497 | -0.126924643 | -0.081619596 | -0.041957147 | 0.0033479    | 0.045305048  | 0.929758406 | 0.999675886 | 0.928424903 |
| sp P04899 GNAI2_HUMAN    | 8  | 11 | 20 | 9  | 0.116974 | -0.024753246 | 0.373930954  | -0.141727377 | 0.256956823  | 0.3986842    | 0.842143814 | 0.676223342 | 0.315554592 |
| sp P18577 RHCE_HUMAN     | 7  | 4  | 7  | 3  | -0.46239 | -0.38584723  | 1.357962172  | 0.076539258  | 1.820348661  | 1.743809403  | 0.994170348 | 0.155665005 | 0.28526785  |
| sp P56211 ARFP19_HUMAN   | 8  | 8  | 14 | 6  | -0.02687 | -0.025071118 | 0.223746597  | 0.001794702  | 0.250612417  | 0.248817715  | 0.99989072  | 0.282838777 | 0.199151805 |
| sp P23378 GCSF_HUMAN     | 3  | 4  | 7  | 3  | -0.0988  | -0.000614304 | 0.097499587  | 0.0981826    | 0.996296491  | 0.89811389   | 0.97159625  | 0.158403877 | 0.182038727 |
| sp Q15661 TRYB1_HUMAN    | 1  | 40 | 76 | 33 | 0.077384 | 0.036895544  | 0.149862654  | -0.040488951 | 0.072478159  | 0.11296711   | 0.729930974 | 0.499965281 | 0.121080221 |
| sp Q9HW11 LRRC4_HUMAN    | 9  | 16 | 27 | 12 | 0.167504 | 0.143061674  | -0.037881964 | -0.024442351 | -0.205385989 | -0.180943638 | 0.913519863 | 0.018551857 | 0.023099864 |
| sp Q9Y3B8 ORN_HUMAN      | 6  | 27 | 48 | 21 | -0.16453 | -0.015308032 | -0.082467707 | 0.149217567  | 0.082057892  | -0.067159674 | 0.208353728 | 0.718831401 | 0.760554325 |
| sp Q9UN52 CSN3_HUMAN     | 3  | 17 | 35 | 15 | -0.08312 | 0.092227233  | 0.312502545  | 0.175350088  | 0.39562523   | 0.202075221  | 0.080430971 | 0.000317549 | 0.027959566 |
| sp Q95166 GBRAP_HUMAN    | 1  | 18 | 34 | 14 | -0.10481 | -0.151076861 | 0.412593327  | -0.046264049 | 0.517406139  | 0.563670188  | 0.942333579 | 0.010512596 | 0.004123311 |
| sp Q95390 GDF11_HUMAN    | 7  | 3  | 7  | 4  | 0.138893 | 0.254659351  | 0.00448885   | 0.115766258  | -0.134404242 | -0.2501705   | 0.782540643 | 0.679595565 | 0.00245116  |
| sp Q9H088 CRLD2_HUMAN    | 2  | 4  | 6  | 3  | 0.232332 | -0.048936811 | 0.346597146  | -0.28126864  | 0.114265587  | 0.395534227  | 0.76842984  | 0.96868525  | 0.65267933  |
| sp P55008 AIF1_HUMAN     | 1  | 18 | 34 | 14 | -0.13874 | -0.045247589 | 0.33641765   | 0.093491764  | 0.472381118  | 0.378889354  | 0.5313151   | 0.0010779   | 0.000493542 |
| sp Q9BKX5 B2L13_HUMAN    | 22 | 4  | 6  | 3  | -0.64224 | -0.256232967 | 0.040339692  | 0.386010846  | 0.682583505  | 0.296572659  | 0.831538098 | 0.66852894  | 0.912438999 |
| sp Q9UGN4 CLM8_HUMAN     | 22 | 36 | 69 | 30 | -0.25999 | -0.174822538 | 0.249528421  | 0.085165547  | 0.509516506  | 0.424350959  | 0.657774971 | 0.80605     | 0.000216664 |
| sp P61923 COP21_HUMAN    | 24 | 4  | 7  | 3  | -0.28791 | -0.289889651 | 0.02701929   | -0.001977988 | 0.314930953  | 0.316908941  | 0.999939923 | 0.391176132 | 0.319866397 |
| sp Q96AC1 FERM2_HUMAN    | 1  | 30 | 55 | 24 | -0.36961 | -0.674638485 | -0.262551123 | -0.305032586 | 0.107054776  | 0.412087362  | 0.378951853 | 0.920214659 | 0.219799773 |
| sp P28300 LYOY_HUMAN     | 8  | 40 | 76 | 33 | -0.21037 | -0.107971542 | 0.594466172  | 0.10240148   | 0.804839394  | 0.702437714  | 0.691399466 | 1.016       | 0.48606     |
| sp P62942 FKB1A_HUMAN    | 18 | 40 | 76 | 33 | -0.20611 | -0.12056935  | 0.189967364  | 0.085535905  | 0.396072619  | 0.310536713  | 0.65812897  | 0.002713135 | 0.009341219 |
| sp Q14556 G3PT_HUMAN     | 2  | 18 | 35 | 16 | 0.208371 | 0.175694263  | 0.07571847   | -0.032676299 | -0.132625099 | -0.099975794 | 0.855773684 | 0.166663708 | 0.02616287  |
| sp Q9UBX5 FBN5_HUMAN     | 3  | 40 | 76 | 33 | -0.1267  | -0.090482731 | 0.18401435   | 0.036221307  | 0.310718389  | 0.274497082  | 0.811367655 | 6.33e-05    | 6.73e-05    |
| sp P01889 HLAB_HUMAN     | 12 | 40 | 76 | 33 | -0.02782 | 0.177500671  | 0.343392416  | 0.205325404  | 0.371217179  | 0.165891745  | 0.06354167  | 0.002436818 | 0.202180446 |
| sp Q9Y6U3 ADSV_HUMAN     | 1  | 17 | 34 | 16 | 0.387296 | 0.090303494  | -0.368901848 | -0.296923231 | -0.756197663 | -0.459205342 | 0.038855199 | 2.68e-06    | 0.00095501  |
| sp Q8TD22 MICA1_HUMAN    | 1  | 7  | 14 | 6  | -0.21997 | 0.107797838  | 0.253949341  | 0.327762359  | 0.473919612  | 0.146151503  | 0.763994589 | 0.678742919 | 0.952504862 |
| sp Q5SQ64 LY66F_HUMAN    | 3  | 40 | 76 | 33 | -0.34916 | 0.013312231  | 0.106334655  | 0.362467512  | 0.455489936  | 0.093022424  | 0.000848438 | 0.000470059 | 0.645843892 |
| sp Q8N251 LTBP4_HUMAN    | 1  | 40 | 76 | 33 | -0.1049  | -0.173331412 | 0.274498907  | -0.0684311   | 0.379400109  | 0.447831219  | 0.651858003 | 0.000282839 | 7.37e-07    |
| sp P35475 IDUA_HUMAN     | 2  | 8  | 13 | 6  | 0.088847 | 0.249875279  | 0.088461261  | 0.161028119  | -0.000385899 | -0.16144018  | 0.654227122 | 0.99999828  | 0.701494023 |
| sp P20962 PTM5_HUMAN     | 2  | 7  | 13 | 6  | -0.10876 | 0.073993874  | 0.456345973  | 0.18270038   | 0.56510798   | 0.382407599  | 0.664390427 | 0.081129228 | 0.216142058 |
| sp Q9Y566 PCDB3_HUMAN    | 9  | 7  | 14 | 6  | -0.09221 | 0.019627374  | 0.152163971  | 0.111838064  | 0.244374661  | 0.132536597  | 0.491666062 | 0.111677638 | 0.410665639 |
| sp Q00139 KIF2A_HUMAN    | 1  | 21 | 42 | 18 | 0.237935 | 0.367967108  | 0.537548469  | 0.130031993  | 0.299613354  | 0.169581362  | 0.783924067 | 0.412600667 | 0.689459355 |
| sp P01911 DRB_HUMAN      | 1  | 40 | 76 | 33 | -0.18266 | -0.104069429 | -0.182752955 | 0.078590544  | -9.30e-05    | -0.078683526 | 0.88899858  | 0.999999886 | 0.916016572 |
| sp Q9H987 SYPL2_HUMAN    | 7  | 4  | 6  | 2  | -0.39022 | -0.596832695 | 0.477963797  | -0.206616234 | 2.868180258  | 3.074796492  | 0.975920189 | 1.128665492 | 0.081547453 |
| sp Q9UHQ2 PC51N_HUMAN    | 20 | 17 | 35 | 15 | -0.15796 | -0.231000476 | 0.061692244  | -0.037044623 | 0.219648097  | 0.29269272   | 0.886361383 | 0.178538294 | 0.027188668 |
| sp P55291 CAD15_HUMAN    | 4  | 29 | 55 | 24 | -0.19867 | -0.339616331 | 0.082185734  | -0.140945949 | 0.280852517  | 0.421802066  | 0.596104536 | 0.245623641 | 0.020218823 |
| sp P0DP04 HV43D_HUMAN    | 2  | 7  | 14 | 6  | 0.173395 | 0.283119619  | 0.250774924  | 0.109724367  | 0.077379672  | -0.032344695 | 0.764387044 | 0.91096051  | 0.978972024 |
| sp P0DP03 HVC05_HUMAN    | 8  | 14 | 28 | 13 | -0.03494 | -0.010094128 | 0.072755967  | 0.024844462  | 0.107694557  | 0.082850095  | 0.985451709 | 0.820340953 | 0.856825065 |
| sp Q13214 SEM3B_HUMAN    | 1  | 11 | 20 | 9  | 0.514553 | 0.307224402  | 0.3711916    | -0.207832197 | -0.143361    | 0.063967198  | 0.288358719 | 0.676219108 | 0.88325616  |
| sp Q16281 CNGA3_HUMAN    | 1  | 3  | 7  | 4  | 0.741788 | 0.084581371  | 0.059909623  | -0.657206456 | -0.681878205 | -0.024671749 | 0.189613170 | 0.226113108 | 0.996696306 |
| sp Q14623 IHH_HUMAN      | 8  | 21 | 41 | 18 | 0.020469 | -0.081641004 | 0.037837203  | -0.102109696 | -0.058305895 | 0.043803801  | 0.478350346 | 0.848152656 | 0.883817783 |
| sp Q6C8J9 CR3L3_HUMAN    | 2  | 33 | 62 | 27 | -0.07432 | -0.057093329 | 0.055302678  | 0.017228903  | 0.12962491   | 0.112396007  | 0.981187051 | 0.479594651 | 0.496563681 |
| sp Q6W4X9 MUC6_HUMAN     | 5  | 4  | 6  | 3  | -0.265   | -0.020117823 | 1.682362428  | 0.244886032  | 1.947366283  | 1.702480251  | 0.937586886 | 0.10109789  | 0.123758606 |
| sp Q86T13 CLC14_HUMAN    | 3  | 40 | 76 | 33 | -0.07922 | -0.078881093 | 0.132504338  | 0.000343718  | 0.211729149  | 0.211385431  | 0.99997402  | 0.900354674 | 0.00354674  |
| sp Q96D66 CMBL1_HUMAN    | 8  | 26 | 48 | 22 | 0.010506 | 0.082076791  | 0.211400106  | 0.0715711    | 0.200894414  | 0.129323315  | 0.626494036 | 0.079877933 | 0.296670748 |
| sp Q8WVW6 SCTM1_HUMAN    | 5  | 36 | 69 | 30 | 0.000786 | 0.038543529  | 0.31798891   | 0.037757107  | 0.317202488  | 0.279445381  | 0.82862727  | 0.000233849 | 0.00023875  |
| sp Q13633 LAMA4_HUMAN    | 12 | 17 | 34 | 16 | 0.22044  | 0.304731179  | 0.472598911  | 0.084291428  | 0.25215916   | 0.167867732  | 0.745646616 | 0.156707837 | 0.332832462 |
| sp P49913 CAMP_HUMAN     | 8  | 40 | 76 | 33 | -0.45545 | -0.107857896 | 0.373705653  | 0.347590138  | 0.829153686  | 0.481563549  | 0.02255686  | 1.25e-06    | 0.00195513  |
| sp Q96K76 UBP47_HUMAN    | 2  | 4  | 7  | 3  | 0.043246 | -0.25074724  | 0.344372528  | -0.293993216 | 0.300226552  | 0.594219768  | 0.766054012 | 0.828137614 | 0.42777893  |
| sp Q8N423 LIR8_HUMAN     | 2  | 40 | 76 | 33 | -0.21849 | -0.128814056 | 0.085558606  | 0.08968042   | 0.304053083  | 0.214372663  | 0.48973286  | 0.05524716  | 0.030793912 |
| sp Q9H089 RETN_HUMAN     | 19 | 21 | 41 | 19 | -0.48657 | -0.310869865 | 0.069057466  | 0.17569274   | 0.555624571  | 0.379927331  | 0.664083427 | 0.059254352 | 0.173730961 |
| sp Q15366 PCBP2_HUMAN    | 10 | 30 | 55 | 23 | -0.32152 | -0.214997017 | 0.328747685  | 0.106522727  | 0.65026698   | 0.543744703  | 0.784825683 | 0.          |             |

|                        |    |    |    |    |          |              |              |              |              |              |              |             |             |
|------------------------|----|----|----|----|----------|--------------|--------------|--------------|--------------|--------------|--------------|-------------|-------------|
| sp P01185 NEU2_HUMAN   | 3  | 14 | 28 | 13 | 0.10219  | 0.318899877  | 0.444288698  | 0.216709834  | 0.342098656  | 0.125388822  | 0.546350158  | 0.340896125 | 0.823380078 |
| sp Q7S9N0 FBN3_HUMAN   | 9  | 8  | 14 | 6  | -0.10949 | -0.086872667 | -0.095653388 | 0.022620848  | 0.013836127  | -0.008784721 | 0.964710993  | 0.950978159 | 0.995533772 |
| sp P21741 MK_HUMAN     | 7  | 8  | 14 | 6  | -0.89474 | -0.101933813 | 0.533441799  | -0.10718975  | 1.428185862  | 1.535375612  | 0.972750953  | 0.430607003 | 0.490982762 |
| sp P30050 RL12_HUMAN   | 14 | 3  | 7  | 4  | -0.42921 | -0.267485471 | 0.349162239  | 0.161726591  | 0.778374301  | 0.61664771   | 0.831919844  | 0.066260178 | 0.076757062 |
| sp P0C718 KRAJ2_HUMAN  | 5  | 8  | 13 | 6  | -0.29859 | 0.111376211  | -0.2046398   | 0.409667651  | -0.906043466 | -1.316010191 | 0.876874053  | 0.645280688 | 0.361370033 |
| sp Q14008 CKAP5_HUMAN  | 8  | 4  | 7  | 3  | 0.008765 | -0.337702256 | 0.250885385  | -0.346467168 | 0.242120473  | 0.588587641  | 0.63573368   | 0.857848528 | 0.360289212 |
| sp Q08188 TGM3_HUMAN   | 15 | 21 | 42 | 19 | -0.40565 | -0.205091753 | -0.508327211 | 0.200556767  | -0.102678691 | -0.303235458 | 0.721965319  | 0.940721994 | 0.500713677 |
| sp Q9NV07 PARVA_HUMAN  | 1  | 40 | 76 | 33 | -0.07466 | -0.420977077 | -0.196927477 | -0.346319474 | -0.122269874 | 0.2240496    | 0.109935718  | 0.823722476 | 0.430982869 |
| sp Q00973 B4GN1_HUMAN  | 3  | 20 | 34 | 14 | -0.12468 | -0.084988308 | -0.098852632 | 0.039688616  | 0.025842492  | -0.013864324 | 0.787664711  | 0.935844088 | 0.977230479 |
| sp Q15389 ANGP1_HUMAN  | 3  | 11 | 21 | 9  | 0.020675 | 0.191706938  | -0.053012084 | 0.171032192  | -0.073686831 | -0.244719023 | 0.415502842  | 0.89189764  | 0.071756783 |
| sp P01877 IGHA2_HUMAN  | 1  | 11 | 21 | 10 | -0.11885 | -0.084375008 | 0.305774736  | 0.03447641   | 0.424626154  | 0.390149744  | 0.976921653  | 0.091063586 | 0.074239964 |
| sp Q9NRR1 CYTL1_HUMAN  | 5  | 8  | 13 | 5  | 0.418674 | -0.020367669 | -0.063226638 | -0.439041407 | -0.481900376 | -0.042858969 | 0.008843904  | 0.024304233 | 0.95676052  |
| sp Q7L591 DOK3_HUMAN   | 2  | 11 | 21 | 9  | -0.22208 | -0.021678203 | 0.34590695   | 0.200308385  | 0.567983138  | 0.367647453  | 0.793040069  | 0.289375613 | 0.510288721 |
| sp Q13057 COASY_HUMAN  | 5  | 11 | 21 | 9  | 0.031699 | 0.03829523   | 0.431780175  | 0.006596295  | 0.40008124   | 0.393484945  | 0.999439844  | 0.257539708 | 0.19069509  |
| sp P18084 ITBS_HUMAN   | 7  | 40 | 76 | 33 | 0.029873 | -0.103540711 | 0.143483514  | -0.133413526 | 0.113610699  | 0.247024225  | 0.418372434  | 0.645320707 | 0.07603095  |
| sp P28065 PS9B_HUMAN   | 22 | 40 | 76 | 33 | -0.40578 | -0.179911869 | 0.430456715  | 0.225863713  | 0.836232297  | 0.610368584  | 0.15452466   | 1.77E-07    | 0.000663105 |
| sp Q75629 CREG1_HUMAN  | 14 | 32 | 62 | 27 | 0.20137  | 0.025422694  | -0.284496096 | -0.175941797 | -0.485865987 | -0.30991879  | 0.227621316  | 0.000663105 | 0.018818366 |
| sp Q81W45 NRRD_HUMAN   | 7  | 4  | 7  | 3  | 0.02764  | -0.043297448 | 0.23848494   | -0.070937053 | 0.210845335  | 0.281782388  | 0.825147761  | 0.349111863 | 0.124819565 |
| sp Q9G2M5 YIPF3_HUMAN  | 8  | 32 | 62 | 28 | -0.04632 | -0.072143425 | 0.246923512  | -0.02582706  | 0.293239877  | 0.319066938  | 0.970550526  | 0.307944653 | 0.018624408 |
| sp Q9C0K3 ARP3C_HUMAN  | 12 | 25 | 40 | 20 | 0.007735 | -0.117330613 | 0.614319989  | -0.125065553 | 0.606585049  | 0.731650602  | 0.79880086   | 0.033085654 | 0.002316153 |
| sp Q16819 MEP1A_HUMAN  | 11 | 21 | 41 | 18 | -0.00023 | -0.135070018 | 0.16915014   | -0.134836515 | 0.169384008  | 0.304220158  | 0.47875164   | 0.044740314 | 0.00255678  |
| sp P01513 RNAS2_HUMAN  | 9  | 40 | 76 | 33 | -0.00716 | 0.008709582  | 0.093885138  | 0.015864845  | 0.101040401  | 0.085175556  | 0.953388942  | 0.267674093 | 0.303202565 |
| sp Q14579 COPE_HUMAN   | 1  | 8  | 14 | 6  | -0.29112 | -0.478905861 | -0.247386427 | -0.187783387 | 0.043736046  | 0.231519433  | 0.737116312  | 0.683032994 | 0.990832994 |
| sp Q13098 CSN1_HUMAN   | 3  | 8  | 14 | 6  | 0.011288 | 0.315832865  | 0.32584834   | 0.304545173  | 0.314560648  | 0.010015475  | 0.110064126  | 0.196565661 | 0.997831786 |
| sp P0DP57 SLUR2_HUMAN  | 14 | 28 | 55 | 24 | 0.071256 | 0.007373791  | 0.327796373  | -0.06384826  | 0.256539982  | 0.320422582  | 0.741134257  | 0.039283283 | 0.001869457 |
| sp Q81Q67 AMOL1_HUMAN  | 3  | 29 | 56 | 23 | -0.15126 | -0.107659315 | -0.013485694 | 0.043598272  | 0.13771892   | 0.09417362   | 0.880968038  | 0.431034268 | 0.605283094 |
| sp Q72304 MAMC2_HUMAN  | 2  | 11 | 20 | 9  | -0.25373 | -0.228505958 | 0.382529668  | 0.045294378  | 0.636264064  | 0.611035626  | 0.992946622  | 0.056457175 | 0.051499737 |
| sp Q9UGM3 DMBT1_HUMAN  | 3  | 36 | 69 | 30 | -0.34827 | -0.320656662 | 0.45327968   | 0.027617519  | 0.80155386   | 0.773936341  | 0.97657541   | 5.20E-06    | 6.72E-07    |
| sp P0DMQ5 INAM2_HUMAN  | 2  | 6  | 14 | 7  | -0.13139 | -0.155007746 | 0.359297022  | -0.023608871 | 0.490688897  | 0.514297768  | 0.9912629018 | 0.082743956 | 0.023909724 |
| sp P15509 CSF2R_HUMAN  | 7  | 25 | 49 | 22 | 0.02866  | 0.049745802  | 0.021785916  | 0.021086195  | -0.006873692 | -0.027959887 | 0.950071874  | 0.996157361 | 0.920759547 |
| sp Q8N729 NPW_HUMAN    | 9  | 23 | 41 | 18 | 0.225123 | 0.046234917  | 0.437939389  | -0.178887964 | 0.212816509  | 0.391704473  | 0.18157218   | 0.900878395 | 0.001593747 |
| sp Q9H173 DCTP1_HUMAN  | 50 | 14 | 28 | 12 | -0.4892  | -0.231797196 | 0.244303486  | 0.257405116  | 0.733505798  | 0.476100682  | 0.309136772  | 0.002383158 | 0.052333158 |
| sp Q00050 IMA4_HUMAN   | 15 | 15 | 28 | 12 | 0.058754 | 0.00269102   | 0.220010451  | -0.056684887 | 0.161256462  | 0.217941348  | 0.925421457  | 0.653973922 | 0.38068773  |
| sp P01308 INS_HUMAN    | 9  | 4  | 7  | 3  | -0.13146 | 0.029723776  | -0.087373962 | 0.161180587  | 0.04408285   | -0.110797738 | 0.750498289  | 0.982526897 | 0.880813054 |
| sp Q8WU21 SRB4_HUMAN   | 3  | 12 | 20 | 8  | 0.148187 | 0.16260475   | -0.045313329 | 0.014417251  | -0.193500828 | -0.207918079 | 0.985972061  | 0.211637538 | 0.122610769 |
| sp Q68817 OLM24_HUMAN  | 19 | 40 | 75 | 33 | 0.108881 | 0.032327065  | 0.411675007  | -0.01653384  | 0.302794059  | 0.379347943  | 0.82433058   | 0.128231058 | 0.01022628  |
| sp P29965 CD40L_HUMAN  | 2  | 12 | 21 | 11 | -0.01862 | 0.059349915  | 0.194016415  | 0.07965125   | 0.212631625  | 0.1346665    | 0.858914879  | 0.67036455  | 0.689420415 |
| sp P106367 TAU_HUMAN   | 4  | 4  | 6  | 3  | 0.514625 | 0.324990505  | 1.352312137  | -0.171634349 | 0.837687282  | 1.009321632  | 0.973544964  | 0.44601028  | 0.487568275 |
| sp P436867 PR56B_HUMAN | 4  | 4  | 7  | 3  | -0.18693 | -0.137227611 | 0.536682916  | 0.049706316  | 0.723616874  | 0.673910558  | 0.939541651  | 0.050160876 | 0.040196803 |
| sp Q16674 MIA_HUMAN    | 32 | 14 | 28 | 12 | -0.00024 | -0.014009159 | 0.103030488  | 0.04125088   | 0.10057221   | 0.059321329  | 0.854376915  | 0.527111952 | 0.746770853 |
| sp Q15247 CLIC2_HUMAN  | 49 | 8  | 14 | 6  | -0.02805 | -0.048542645 | 0.203458855  | 0.07659703   | 0.23151324   | 0.15491621   | 0.819521746  | 0.30944666  | 0.517791902 |
| sp Q9Y2G1 MYRF_HUMAN   | 2  | 40 | 76 | 33 | -0.06723 | -0.005838413 | 0.313705535  | 0.016845485  | 0.380934432  | 0.364088947  | 0.956302586  | 1.00E-06    | 1.39E-07    |
| sp Q75309 CAD16_HUMAN  | 3  | 7  | 14 | 6  | -0.11783 | -0.184471969 | 0.663761347  | -0.066645631 | 0.781587684  | 0.848233315  | 0.901348239  | 0.000798417 | 6.32E-05    |
| sp Q9Y369 SIGL9_HUMAN  | 29 | 30 | 56 | 24 | -0.06331 | 0.117173478  | 0.214005741  | 0.180483546  | 0.277315809  | 0.096832263  | 0.01342945   | 0.001180809 | 0.329082712 |
| sp P62857 RS2B_HUMAN   | 5  | 14 | 27 | 12 | -0.22584 | -0.166556928 | 0.942769999  | 0.059287894  | 1.168614821  | 1.109326928  | 0.980212787  | 0.007799382 | 0.003946731 |
| sp Q969M7 UBE2F_HUMAN  | 13 | 17 | 35 | 15 | 0.049818 | 0.062506652  | 0.232396893  | 0.01268859   | 0.182578832  | 0.169890241  | 0.993665233  | 0.406361003 | 0.358835944 |
| sp Q8WUW1 BRK1_HUMAN   | 90 | 17 | 35 | 16 | -0.10985 | 0.045362463  | 0.229072748  | 0.161180587  | 0.338921336  | 0.183710285  | 0.195321135  | 0.00237315  | 0.003913195 |
| sp Q9UL54 TAOK2_HUMAN  | 1  | 8  | 14 | 6  | -0.70089 | -0.489286034 | 0.628287886  | 0.211600618  | 1.329174558  | 1.117573921  | 0.886485653  | 0.058949459 | 0.083028344 |
| sp Q9UHY1 NRBP_HUMAN   | 2  | 7  | 14 | 5  | -0.27122 | -0.239440698 | 0.457981725  | 0.031780283  | 0.729202706  | 0.697422423  | 0.993306666  | 0.134212938 | 0.001292968 |
| sp Q8N386 LRC25_HUMAN  | 6  | 4  | 7  | 3  | -0.24099 | -0.389319783 | -0.57913634  | -0.148326244 | -0.3381428   | -0.189816557 | 0.414639739  | 0.074273899 | 0.314191283 |
| sp Q9P2X0 DPM3_HUMAN   | 1  | 40 | 76 | 33 | -0.13276 | -0.073911377 | 0.049254789  | 0.206672807  | 0.083506664  | -0.123166167 | 0.642364645  | 0.284367984 | 0.000965294 |
| sp Q92688 AN32B_HUMAN  | 1  | 7  | 14 | 6  | -0.10537 | -0.097321185 | 0.446414696  | 0.0805082    | 0.551786702  | 0.543735882  | 0.999303181  | 0.127182223 | 0.078417159 |
| sp Q9ULAO DNPEP_HUMAN  | 1  | 10 | 20 | 8  | -0.32503 | 0.025862798  | 0.352214135  | 0.350894316  | 0.677245653  | 0.326351337  | 0.214200288  | 0.018468949 | 0.261568891 |
| sp Q5XPI4 RN123_HUMAN  | 2  | 8  | 14 | 6  | 0.548053 | 0.171946709  | 0.818717173  | 0.171423211  | 0.270664294  | 0.099241083  | 0.811290488  | 0.70542241  | 0.943450793 |
| sp Q000587 MFNG_HUMAN  | 2  | 23 | 41 | 17 | 0.053212 | 0.112763313  | 0.178892037  | 0.05512584   | 0.125680308  | 0.066128724  | 0.311214916  | 0.085765008 | 0.309101096 |
| sp Q9V6N8 CAD10_HUMAN  | 2  | 36 | 69 | 30 | 0.054489 | -0.006070471 | 0.142114733  | -0.06055937  | 0.087625834  | 0.148185204  | 0.611401483  | 0.491284061 | 0.07850978  |
| sp Q9UW08 ISK6_HUMAN   | 9  | 11 | 21 | 9  | 0.182248 | 0.126253636  | 0.106107853  | -0.055994328 | -0.076140112 | -0.020145784 | 0.945499878  | 0.931441135 | 0.993679555 |
| sp Q8T844 IRIN3_HUMAN  | 1  | 7  | 14 | 5  | -0.133   | -0.062234385 | 0.603942375  | 0.067909703  | 0.736945833  | 0.666176761  | 0.962800958  | 0.009252758 | 0.003946731 |
| sp Q8WVA1 TMM40_HUMAN  | 3  | 4  | 7  | 3  | 0.637924 | 0.206091392  | -0.195329799 | -0.43183266  | -0.833257031 | -0.401424371 | 0.50384779   | 0.206823394 | 0.607975345 |
| sp P15924 DESIP_HUMAN  | 4  | 7  | 13 | 5  | -0.18266 | 0.333112734  | 0.008269933  | 0.515772792  | 0.190929991  | -0.324842801 | 0.68076325   | 0.884577507 | 0.000965294 |
| sp Q95989 NUDT3_HUMAN  | 49 | 11 | 21 | 10 | 0.134219 | 0.139526159  | 0.251998945  | 0.005306741  | 0.117779527  | 0.112472786  | 0.990697021  | 0.719324061 | 0.678511109 |
| sp P17661 DESM_HUMAN   | 1  | 4  | 6  | 3  | -0.02009 | 0.056793736  | 0.821156991  | 0.076887981  | 0.841251236  | 0.764363255  | 0.986979081  | 0.64269423  | 0.378780795 |
| sp P04439 HLAA_HUMAN   | 3  | 40 | 76 | 33 | -0.23279 | -0.061325561 | 0.081525495  | 0.171468505  | 0.314346561  | 0.142878056  | 0.341005516  | 0.085150506 | 0.517498557 |
| sp Q30154 DRB5_HUMAN   | 3  | 30 | 56 | 23 | 0.046239 | 0.05920479   | 0.212494505  | 0.012965474  | 0.16625519   | 0.153289715  | 0.346154254  | 0.341900564 | 0.000955614 |
| sp Q94766 B3GA3_HUMAN  | 3  | 36 | 69 | 30 | -0.173   | -0.091390263 | 0.263888169  | 0.081610416  | 0.436888848  | 0.355278433  | 0.509065363  | 6.73E-06    | 3.61E-05    |
| sp Q94100 AGRL1_HUMAN  | 2  | 7  | 13 | 6  | 0.249384 | 0.13057617   | 0.62561983   | -0.118807853 | 0.28517796   | 0.403985813  | 0.           |             |             |

|                        |    |    |    |    |          |              |              |              |              |              |             |              |             |
|------------------------|----|----|----|----|----------|--------------|--------------|--------------|--------------|--------------|-------------|--------------|-------------|
| sp P02538 K2C6A_HUMAN  | 7  | 18 | 34 | 13 | -1.79909 | -1.411949932 | -1.56589522  | 0.387135652  | 0.233190364  | -0.153945288 | 0.788048681 | 0.94588715   | 0.970229784 |
| sp O95292 VAFB_HUMAN   | 9  | 10 | 20 | 9  | -0.19236 | -0.136439759 | 0.341335952  | 0.055917537  | 0.533693248  | 0.477775122  | 0.93984357  | 0.027566904  | 0.023469346 |
| sp G01655 LAIR2_HUMAN  | 5  | 10 | 21 | 9  | -0.963   | -0.869393207 | 0.044206792  | 0.093606522  | 1.405060521  | 1.311453999  | 0.956602934 | 0.002839384  | 0.001314798 |
| sp O90633 KLK14_HUMAN  | 1  | 11 | 21 | 8  | 0.082968 | 0.051885391  | -0.190512981 | -0.031082788 | -0.27348116  | -0.242398372 | 0.948769193 | 0.088293937  | 0.091831701 |
| sp O5T749 KRRP_HUMAN   | 15 | 26 | 48 | 21 | -0.53344 | -0.563311131 | -0.849578719 | -0.029875399 | -0.316142986 | -0.286267588 | 0.995250609 | 0.069087066  | 0.686217489 |
| sp O14657 TOR1B_HUMAN  | 9  | 11 | 20 | 9  | 0.095921 | 0.10496391   | 0.255774877  | 0.009042776  | 0.159853743  | 0.150810967  | 0.994185268 | 0.294049353  | 0.256577063 |
| sp Q86Y23 HORN_HUMAN   | 3  | 40 | 76 | 33 | 0.925392 | 0.393523936  | 0.553420531  | -0.531868025 | -0.37197143  | 0.159896959  | 0.024115742 | 0.275555005  | 0.736204318 |
| sp Q8WX77 IBPL1_HUMAN  | 3  | 4  | 6  | 3  | 0.443231 | 0.750375662  | 1.704797438  | 0.307144829  | 1.261566605  | 0.954421776  | 0.886796652 | 0.00285259   | 0.102313180 |
| sp P07311 ACY1_HUMAN   | 7  | 18 | 35 | 16 | -0.02005 | 0.154894713  | 0.167663444  | 0.174943427  | 0.187712159  | 0.012768731  | 0.180719197 | 0.243773144  | 0.991342908 |
| sp O43405 COCH_HUMAN   | 4  | 37 | 69 | 29 | -0.02037 | 0.024068154  | 0.153297965  | 0.044436424  | 0.173666236  | 0.192229812  | 0.823815202 | 0.141024311  | 0.993479889 |
| sp O12931 TRAP1_HUMAN  | 10 | 21 | 41 | 19 | -0.2535  | -0.110941224 | 0.173045009  | 0.142559074  | 0.426545307  | 0.283986233  | 0.74395934  | 0.156685194  | 0.338561599 |
| sp O00170 AIP_HUMAN    | 1  | 3  | 7  | 4  | 0.350459 | 0.339443142  | 0.533492939  | -0.011015386 | 0.183034411  | 0.194049797  | 0.999389695 | 0.2472990367 | 0.798698163 |
| sp O94788 ALIA2_HUMAN  | 21 | 4  | 6  | 3  | -0.49523 | -0.557538128 | -0.241082395 | -0.062310392 | 0.25414534   | 0.316455732  | 0.991551938 | 0.904971081  | 0.836001597 |
| sp P07204 TRBM_HUMAN   | 6  | 29 | 56 | 24 | 0.010542 | -0.013119032 | 0.317638067  | -0.023660578 | 0.307096521  | 0.330757099  | 0.944591148 | 0.002222654  | 0.000183898 |
| sp O9Y249 B3GN3_HUMAN  | 7  | 4  | 6  | 3  | 0.292781 | 0.104528883  | 0.473019979  | -0.188252606 | 0.180238491  | 0.368491096  | 0.131118983 | 0.241347526  | 0.008553605 |
| sp P09466 PAEP_HUMAN   | 14 | 20 | 35 | 15 | 0.185691 | 0.037240627  | -0.436678275 | -0.148450038 | -0.622368939 | -0.473918902 | 0.875765297 | 0.00851782   | 0.040882785 |
| sp O9Y280 CNPY2_HUMAN  | 11 | 12 | 21 | 9  | -0.15615 | -0.20579737  | 0.078669596  | -0.049644047 | 0.234823278  | 0.284467326  | 0.949431029 | 0.065046638  | 0.258559711 |
| sp P09327 VILI_HUMAN   | 3  | 23 | 42 | 17 | 0.219819 | 0.149380941  | -0.193618355 | -0.07043852  | -0.413437816 | -0.342999296 | 0.780059442 | 0.005531138  | 0.011344021 |
| sp P06679 CBP2_HUMAN   | 5  | 4  | 7  | 3  | -0.02658 | 0.222491844  | -0.517699377 | 0.249067087  | -0.491124135 | -0.740191222 | 0.822702625 | 0.608676781  | 0.277968043 |
| sp P06994 GLT18_HUMAN  | 5  | 22 | 41 | 18 | 0.077897 | 0.10652073   | 0.363503102  | 0.028623718  | 0.28560609   | 0.256982372  | 0.96980252  | 0.129802396  | 0.124061605 |
| sp P60891 PRP51_HUMAN  | 1  | 4  | 7  | 3  | 0.133493 | 0.18479391   | 0.915290117  | 0.05130111   | 0.057797318  | 0.006496207  | 0.923599548 | 0.934274844  | 0.998941276 |
| sp P68371 TBB4B_HUMAN  | 30 | 25 | 48 | 22 | -0.23247 | -0.126848032 | 0.374367388  | 0.105618198  | 0.606833619  | 0.501215421  | 0.776504327 | 0.004027198  | 0.007506991 |
| sp Q98R8 PYM1_HUMAN    | 11 | 11 | 20 | 8  | 0.038316 | -0.019258894 | 0.293930619  | -0.057574493 | 0.255615019  | 0.313189513  | 0.893188901 | 0.247796991  | 0.082447111 |
| sp P49585 SYCC_HUMAN   | 1  | 4  | 7  | 3  | 0.098454 | 0.147101513  | 0.472519507  | 0.048647079  | 0.374065073  | 0.325417994  | 0.913408151 | 0.062543002  | 0.073413033 |
| sp P59190 RAB15_HUMAN  | 15 | 4  | 7  | 3  | -0.38738 | -0.259253469 | 0.861663595  | 0.1281309    | 1.249047963  | 1.120917064  | 0.94368133  | 0.059214215  | 0.060994534 |
| sp P36507 MP2K2_HUMAN  | 17 | 15 | 27 | 12 | 0.025095 | 0.03733102   | 0.305482208  | 0.012237835  | 0.280386942  | 0.268149107  | 0.995365291 | 0.197294448  | 0.158720406 |
| sp Q9H8W4 PKHF2_HUMAN  | 5  | 13 | 28 | 13 | -0.23358 | -0.104134938 | 0.279351414  | 0.129442393  | 0.512928745  | 0.383486352  | 0.895896899 | 0.29202055   | 0.086767017 |
| sp O60218 AK18A_HUMAN  | 4  | 4  | 7  | 3  | -0.40919 | -0.565739598 | 0.379165959  | -0.156549755 | 0.788355802  | 0.944905557  | 0.940991129 | 0.385511994  | 0.203685323 |
| sp O75022 LIR3B_HUMAN  | 5  | 7  | 14 | 7  | -0.1394  | 0.031407475  | -0.018531297 | 0.170803007  | 0.123564231  | -0.047238772 | 0.726205804 | 0.881041917  | 0.975512964 |
| sp O99627 CSN8_HUMAN   | 10 | 3  | 7  | 4  | 0.185207 | -0.109957825 | 0.202703075  | -0.295164436 | 0.017496464  | 0.3126609    | 0.768898888 | 0.999273766  | 0.701654349 |
| sp Q9NFP0 CD320_HUMAN  | 10 | 25 | 49 | 22 | -0.13695 | -0.012671605 | 0.348183335  | 0.124279357  | 0.485134297  | 0.360854939  | 0.387636568 | 0.000116358  | 0.00116358  |
| sp P060245 PCDH7_HUMAN | 2  | 12 | 21 | 8  | 0.111567 | 0.172781634  | 0.00776711   | 0.061214271  | -0.103800253 | -0.165014524 | 0.721710683 | 0.55196841   | 0.178440021 |
| sp Q8UIC8 GLT13_HUMAN  | 4  | 24 | 48 | 22 | -0.15441 | -0.084460956 | -0.047364653 | 0.069946548  | 0.107042852  | 0.037096303  | 0.573221519 | 0.394626989  | 0.862020667 |
| sp A6NH11 GLTD2_HUMAN  | 11 | 18 | 34 | 15 | 0.036455 | 0.180591505  | 0.20450766   | 0.144136801  | 0.168052952  | 0.023916155  | 0.297645242 | 0.37168971   | 0.820758826 |
| sp O73534 ENTP6_HUMAN  | 2  | 11 | 21 | 10 | 0.010696 | -0.053321292 | -0.137667546 | -0.064017025 | -0.148363279 | -0.084346254 | 0.689454947 | 0.245214549  | 0.947905086 |
| sp Q53FT3 HIKES_HUMAN  | 4  | 18 | 34 | 16 | 0.146219 | 0.066197172  | 0.083299418  | -0.080021826 | -0.062919579 | 0.017102246  | 0.727228164 | 0.867439862  | 0.586562368 |
| sp P62195 PRSB_HUMAN   | 1  | 16 | 27 | 11 | -0.1859  | -0.004579837 | 0.370851319  | 0.181316188  | 0.556747344  | 0.375431156  | 0.391433073 | 0.005519881  | 0.050641587 |
| sp P060259 KLK8_HUMAN  | 30 | 7  | 14 | 6  | 0.166203 | -0.025980711 | -0.120286863 | -0.19218418  | -0.286490332 | -0.094306151 | 0.218655081 | 0.016254737  | 0.976724873 |
| sp P18564 ITB6_HUMAN   | 25 | 30 | 55 | 23 | 0.113204 | 0.056663273  | -0.023323902 | -0.056540873 | -0.136537048 | -0.079961675 | 0.603668003 | 0.144135712  | 0.934555934 |
| sp P08246 ELNE_HUMAN   | 2  | 36 | 69 | 30 | -0.30093 | -0.135344957 | -0.09637545  | 0.165581673  | 0.204551108  | 0.038969507  | 0.401830155 | 0.382178603  | 0.951294715 |
| sp P55160 NCKPL_HUMAN  | 27 | 4  | 7  | 3  | -0.40625 | 0.026384922  | -0.078759681 | 0.432632535  | 0.885010085  | 0.45237476   | 0.488799663 | 0.163292523  | 0.52156719  |
| sp O5T2D2 TRML2_HUMAN  | 4  | 40 | 76 | 33 | -0.12214 | 0.09088487   | -0.033773448 | 0.21302934   | 0.088371023  | -0.124658317 | 5.576       | 0.285451125  | 0.042397404 |
| sp P04085 PDGFA_HUMAN  | 7  | 4  | 7  | 3  | -0.19346 | 0.19118705   | 0.272359513  | 0.384648136  | 0.465820599  | 0.081172463  | 0.566240298 | 0.57008222   | 0.978219566 |
| sp Q96A83 ISOC2_HUMAN  | 4  | 8  | 13 | 6  | 0.031563 | 0.148288459  | 0.343266516  | 0.116725717  | 0.311703774  | 0.194978057  | 0.923254057 | 0.677957326  | 0.832091607 |
| sp P38405 GNAL_HUMAN   | 3  | 10 | 21 | 10 | -0.44318 | -0.207799047 | 0.430252477  | 0.235385382  | 0.873436906  | 0.638051524  | 0.571372887 | 0.068852175  | 0.073676031 |
| sp P84074 HPC4_HUMAN   | 6  | 17 | 35 | 14 | -0.10717 | -0.109026611 | 0.266435807  | -0.001861141 | 0.373601276  | 0.375462417  | 0.998964279 | 0.032324602  | 0.011922332 |
| sp P54296 MYOM2_HUMAN  | 8  | 37 | 69 | 30 | 0.08167  | -0.019037153 | -0.077416768 | -0.100707464 | -0.159087078 | -0.058379614 | 0.557472977 | 0.36848091   | 0.8425909   |
| sp Q86Y33 XYLT1_HUMAN  | 8  | 7  | 14 | 5  | 0.237067 | 0.326367498  | 0.056016052  | 0.089300476  | -0.181050977 | -0.270351446 | 0.886350437 | 0.735507228  | 0.430258999 |
| sp Q96C19 EFHD2_HUMAN  | 2  | 8  | 14 | 6  | 0.085231 | 0.185185781  | 0.052237043  | 0.09954374   | -0.032994367 | -0.132948737 | 0.81004811  | 0.984528322  | 0.736256246 |
| sp P06870 KLK1_HUMAN   | 3  | 15 | 28 | 12 | 0.149206 | -0.106708515 | -0.063023956 | -0.255914782 | -0.212230224 | 0.043684558  | 0.258658637 | 0.524566773  | 0.965670762 |
| sp Q9NR16 C16B8_HUMAN  | 1  | 4  | 6  | 3  | -0.05901 | 0.032590401  | 0.6476174    | 0.091604558  | 0.706631558  | 0.615026999  | 0.952421581 | 0.177025406  | 0.210316567 |
| sp P57721 PCBP3_HUMAN  | 15 | 26 | 49 | 20 | -0.34798 | -0.274006569 | 0.169018161  | 0.073971825  | 0.516996555  | 0.44302473   | 0.929286479 | 0.099492203  | 0.118319601 |
| sp O03405 UPAR_HUMAN   | 4  | 26 | 48 | 21 | -0.32279 | -0.235578572 | 0.610514719  | 0.087208485  | 0.483841237  | 0.396632752  | 0.721171933 | 0.00175457   | 0.004318885 |
| sp P62820 RAB1A_HUMAN  | 50 | 19 | 35 | 14 | -0.10816 | -0.032430715 | 0.148700958  | 0.075726149  | 0.256857821  | 0.181131673  | 0.792922214 | 0.182881289  | 0.346126328 |
| sp Q8U180 TMPSE_HUMAN  | 11 | 40 | 76 | 33 | 0.168482 | 0.153926026  | -0.037344765 | -0.014555755 | -0.205826546 | -0.191270791 | 0.907342299 | 6.42E-06     | 2.23E-06    |
| sp Q9GZ29 UBA5_HUMAN   | 3  | 4  | 7  | 3  | -1.83769 | -2.12764023  | -0.366193375 | -0.289948225 | 1.47149863   | 1.761446855  | 0.949158253 | 0.432101801  | 0.247795841 |
| sp O94973 APZ2A_HUMAN  | 10 | 15 | 27 | 11 | -0.16326 | -0.322078783 | 0.128553086  | -0.158818835 | 0.291813034  | 0.450631869  | 0.793100496 | 0.59953826   | 0.230233173 |
| sp P61026 RAB10_HUMAN  | 1  | 26 | 48 | 22 | -0.1584  | -0.147659455 | 0.266290647  | 0.010738237  | 0.424688339  | 0.413950102  | 0.993907178 | 0.000249472  | 0.000654733 |
| sp P48735 IDHP_HUMAN   | 1  | 40 | 76 | 33 | -0.34441 | -0.03660713  | 0.289186347  | 0.307805515  | 0.633598993  | 0.325793477  | 0.060382017 | 1.02E-06     | 0.006540239 |
| sp Q98YE2 TMPSD_HUMAN  | 14 | 40 | 76 | 33 | 0.221018 | -0.058951166 | -0.237921936 | -0.07968853  | -0.458939623 | -0.178970771 | 0.209858336 | 5.93E-10     | 0.008683336 |
| sp Q5S2K8 FREM2_HUMAN  | 8  | 8  | 13 | 5  | 0.199195 | 0.203875093  | 0.171607753  | 0.004680138  | -0.027587202 | -0.03226734  | 0.999075773 | 0.925024731  | 0.968505004 |
| sp Q96PE1 AGRA2_HUMAN  | 15 | 4  | 7  | 3  | 0.099983 | -0.063299483 | -0.471156732 | -0.163282412 | -0.571139661 | -0.407857249 | 0.74145192  | 0.125820307  | 0.125011881 |
| sp P12117 PYGM_HUMAN   | 4  | 11 | 21 | 8  | 0.238001 | -0.028375293 | 0.010503774  | -0.26637634  | -0.227497274 | 0.038879067  | 0.049615666 | 0.229128644  | 0.945309186 |
| sp Q14525 KT3B_HUMAN   | 39 | 4  | 7  | 3  | -0.23903 | -0.182980782 | 0.412042328  | 0.422005937  | -0.173011773 | -0.59502311  | 0.702137955 | 0.596591662  | 0.565674684 |
| sp O9UHN6 CEIP2_HUMAN  | 2  | 3  | 7  | 4  | 0.138495 | 0.123169072  | -0.020943211 | -0.015326129 | -0.159437513 | -0.144111384 | 0.991133362 | 0.008050524  | 0.415695455 |
| sp Q13247 SRSF6_HUMAN  | 7  | 14 |    |    |          |              |              |              |              |              |             |              |             |



|                       |     |    |    |    |          |              |              |              |              |              |             |             |             |
|-----------------------|-----|----|----|----|----------|--------------|--------------|--------------|--------------|--------------|-------------|-------------|-------------|
| sp Q5TFQ8 SIRBL_HUMAN | 229 | 30 | 55 | 24 | -0.34539 | -0.069523328 | -0.121868815 | 0.275870012  | 0.223524525  | -0.052345487 | 0.340556606 | 0.612921608 | 0.966719751 |
| sp O75487 GPC4_HUMAN  | 16  | 4  | 7  | 3  | -0.02067 | 0.017984564  | -0.127974765 | 0.038652987  | -0.107306342 | -0.145959329 | 0.918753865 | 0.653328665 | 0.398603874 |
| sp POC7U1 ASA2B_HUMAN | 30  | 23 | 41 | 17 | 0.203415 | 0.092183289  | -0.097155334 | -0.111231709 | -0.300570332 | -0.189338623 | 0.440678971 | 0.022776266 | 0.149242511 |
| sp O94903 PLPH_HUMAN  | 6   | 11 | 20 | 9  | -0.14922 | -0.12929562  | 0.28183041   | 0.019922219  | 0.431048249  | 0.41112603   | 0.992828966 | 0.111238885 | 0.083494157 |
| sp O95302 FKBP9_HUMAN | 3   | 11 | 20 | 9  | 0.114261 | 0.150392806  | 0.246434448  | 0.036131487  | 0.132173129  | 0.096041643  | 0.950102247 | 0.624025094 | 0.730709176 |
| sp P20337 RAB3B_HUMAN | 41  | 24 | 48 | 22 | -0.19569 | -0.083824729 | 0.23894058   | 0.111868968  | 0.434634277  | 0.322765309  | 0.419855306 | 0.000214764 | 0.001829913 |
| sp P12724 ECP_HUMAN   | 1   | 24 | 49 | 21 | -0.05481 | -0.070090477 | 0.141470896  | -0.01527773  | 0.196283642  | 0.211561372  | 0.992219378 | 0.412794823 | 0.261813699 |
| sp Q8N1N4 K2C7B_HUMAN | 2   | 14 | 28 | 13 | 0.109004 | -0.056593259 | -0.364940975 | -0.165597752 | -0.473945369 | -0.308347616 | 0.891156387 | 0.510188883 | 0.685406027 |
| sp A8MUU1 FB5L3_HUMAN | 28  | 40 | 76 | 33 | -0.52415 | -0.373750618 | 0.091972651  | 0.150403505  | 0.616126774  | 0.465723268  | 0.523288523 | 0.000882698 | 0.005494206 |
| sp Q9C0H2 TTYH3_HUMAN | 1   | 15 | 28 | 12 | -1.09134 | 0.094287384  | 0.150328271  | 1.185623958  | 1.241664845  | 0.056040887  | 0.000100929 | 0.000745511 | 0.978480657 |
| sp Q95866 G6B_HUMAN   | 2   | 33 | 62 | 27 | -0.42435 | 0.137710678  | 0.059612075  | 0.562059654  | 0.483961052  | -0.078098602 | 5.87E-05    | 0.005331295 | 0.832556361 |
| sp Q9BYX7 ACTBM_HUMAN | 1   | 15 | 27 | 11 | -0.01456 | -0.191253411 | 0.055619203  | -0.176690788 | 0.070181826  | 0.246872614  | 0.461665051 | 0.921649503 | 0.29810833  |
| sp Q9Y3Q8 T22D4_HUMAN | 9   | 7  | 14 | 6  | -0.69278 | -0.112799324 | 0.78922918   | 0.579982511  | 1.482011015  | 0.902028504  | 0.163422999 | 0.001412357 | 0.026616062 |
| sp Q9UKR3 K1K13_HUMAN | 12  | 7  | 14 | 6  | -0.4191  | -0.113066021 | -0.41877019  | 0.306037611  | 0.000333442  | -0.305704169 | 0.733542801 | 0.999999742 | 0.756787138 |
| sp P17066 HSP76_HUMAN | 15  | 40 | 76 | 33 | 0.053013 | 0.087365127  | 0.125023723  | 0.034351831  | 0.072010427  | 0.037658596  | 0.726715521 | 0.382399175 | 0.714078862 |
| sp P35606 COPB2_HUMAN | 6   | 7  | 14 | 6  | -0.12641 | 0.057965745  | 0.285366268  | 0.184372484  | 0.411773007  | 0.227400523  | 0.795870014 | 0.463420335 | 0.732419047 |
| sp Q96A72 MG2N_HUMAN  | 2   | 4  | 6  | 3  | -0.22958 | 0.154200522  | 0.145421695  | 0.383775543  | 0.374996716  | -0.008778827 | 0.387573855 | 0.513709491 | 0.999543271 |
| sp Q14213 IL27B_HUMAN | 2   | 15 | 28 | 12 | -0.13393 | -0.009977554 | 0.164186439  | 0.123952175  | 0.298116167  | 0.174163993  | 0.547280731 | 0.101320583 | 0.362833705 |
| sp P52597 HNRPF_HUMAN | 16  | 7  | 14 | 6  | -0.13317 | -0.148799432 | 0.417620619  | -0.01562567  | 0.550794381  | 0.566420051  | 0.998143243 | 0.224710333 | 0.134696174 |
| sp Q6ZMR3 LDH6A_HUMAN | 27  | 40 | 76 | 33 | -0.09341 | -0.028550867 | 0.242722796  | 0.06485695   | 0.336130612  | 0.271273663  | 0.653489759 | 0.000639817 | 0.002101959 |
| sp Q95803 NDST3_HUMAN | 7   | 4  | 7  | 3  | 0.102677 | 0.049329383  | 0.089655466  | -0.053348002 | -0.013021919 | 0.040326084  | 0.728633786 | 0.987007237 | 0.8593318   |
| sp Q08397 LOXL1_HUMAN | 3   | 7  | 13 | 6  | 0.3771   | 0.290344449  | 0.243998255  | -0.086755092 | -0.133101286 | -0.046346193 | 0.83028477  | 0.734157437 | 0.952937475 |
| sp Q969P0 IGSF8_HUMAN | 1   | 10 | 21 | 10 | -0.11057 | 0.022930109  | -0.074410952 | 0.133498648  | 0.036157588  | -0.09734106  | 0.801886683 | 0.988041589 | 0.888915836 |
| sp P25705 ATPA_HUMAN  | 3   | 8  | 13 | 6  | 0.001067 | -0.265465586 | 0.712665497  | -0.266532495 | 0.711598588  | 0.978131083  | 0.856756996 | 0.475862154 | 0.199065417 |
| sp P55010 IF5_HUMAN   | 22  | 4  | 7  | 3  | -0.59973 | -0.32072814  | 0.869485553  | 0.279004826  | 1.469218519  | 1.190213693  | 0.753177515 | 0.023505569 | 0.041065902 |
| sp P84085 ARF5_HUMAN  | 5   | 11 | 21 | 9  | 0.241137 | 0.259086088  | 0.274888544  | 0.017949429  | 0.033751885  | 0.015802456  | 0.996389743 | 0.99127047  | 0.997556378 |
| sp O75821 EIF3G_HUMAN | 15  | 8  | 13 | 6  | -0.40528 | -0.447617256 | 0.219675868  | -0.042341014 | 0.62495211   | 0.667293124  | 0.996442881 | 0.591693555 | 0.491500028 |
| sp Q6UXB4 CLC4G_HUMAN | 6   | 12 | 21 | 9  | -0.30135 | -0.149380349 | -0.054536803 | 0.151967967  | 0.246811513  | 0.094843546  | 0.187451429 | 0.056627679 | 0.573463908 |
| sp Q8N6G6 ATL1_HUMAN  | 3   | 4  | 7  | 3  | -0.18692 | -0.407801993 | -0.5536664   | -0.220880315 | -0.366744722 | -0.145864407 | 0.128829086 | 0.035418823 | 0.435640356 |
| sp P03971 MIS_HUMAN   | 9   | 4  | 7  | 3  | 0.340621 | 0.259253028  | -0.012323823 | -0.081368018 | -0.352944869 | -0.271576851 | 0.899663564 | 0.299748209 | 0.406511867 |
| sp Q96F85 CNRP1_HUMAN | 8   | 11 | 21 | 9  | -0.0877  | -0.135857114 | 0.411997537  | -0.04815756  | 0.499697092  | 0.547854652  | 0.96666576  | 0.096820296 | 0.031621468 |
| sp Q02223 TNK17_HUMAN | 28  | 19 | 35 | 15 | 0.005062 | -0.077278082 | 0.347746762  | -0.082339755 | 0.34268509   | 0.425024844  | 0.62237323  | 0.005933509 | 0.000102744 |
| sp P35625 TIMP3_HUMAN | 2   | 7  | 14 | 7  | -0.03721 | 0.056059792  | 0.143654655  | 0.093269179  | 0.180864043  | 0.087594863  | 0.873128227 | 0.684852533 | 0.887141301 |
| sp Q14353 GAMT_HUMAN  | 446 | 4  | 7  | 3  | -0.16289 | -0.178496346 | 0.356494451  | -0.01560923  | 0.519381567  | 0.534990797  | 0.998980402 | 0.491388599 | 0.40407771  |
| sp P14866 HNRPL_HUMAN | 1   | 7  | 14 | 5  | -0.41804 | -0.430417606 | 0.736405412  | -0.012379897 | 1.15444312   | 1.166823017  | 0.999467886 | 0.077345743 | 0.04067815  |
| sp Q16553 LY6E_HUMAN  | 2   | 25 | 48 | 21 | 0.019135 | 0.073633991  | 0.125110693  | 0.054499411  | 0.105976113  | 0.051476702  | 0.751827762 | 0.475310562 | 0.797433522 |
| sp P01611 KVD12_HUMAN | 15  | 15 | 27 | 12 | 0.005928 | -0.006959527 | -0.017744453 | -0.012887912 | -0.023672838 | -0.010784926 | 0.994385089 | 0.986953973 | 0.996608481 |

# Supplemental Table II:

| Description                                                                                                                 | SvsHC_padjust | SvsHC_Count | SvsM_padjust | SvsM_Count | MvsHC_padjust | MvsHC_Count |
|-----------------------------------------------------------------------------------------------------------------------------|---------------|-------------|--------------|------------|---------------|-------------|
| Neutrophil degranulation                                                                                                    | 3.92E-59      | 183         | 7.76E-59     | 177        | 0.000172546   | 23          |
| Extracellular matrix organization                                                                                           | 5.50E-40      | 120         | 4.05E-34     | 109        | 1.88E-09      | 25          |
| Regulation of Insulin-like Growth Factor (IGF) transport and uptake by Insulin-like Growth Factor Binding Proteins (IGFBPs) | 3.40E-27      | 63          | 5.85E-24     | 58         | 0.005455229   | 9           |
| Post-translational protein phosphorylation                                                                                  | 5.76E-24      | 55          | 1.61E-20     | 50         | 0.002464872   | 9           |
| Platelet degranulation                                                                                                      | 1.21E-23      | 60          | 7.65E-15     | 47         | 1.89E-16      | 24          |
| Binding and Uptake of Ligands by Scavenger Receptors                                                                        | 6.84E-23      | 33          | 4.35E-18     | 29         | NA            | NA          |
| Response to elevated platelet cytosolic Ca <sup>2+</sup>                                                                    | 9.84E-23      | 60          | 3.52E-14     | 47         | 2.41E-16      | 24          |
| AUF1 (hnRNP D0) binds and destabilizes mRNA                                                                                 | 9.84E-23      | 38          | 8.94E-20     | 35         | NA            | NA          |
| ER-Phagosome pathway                                                                                                        | 2.67E-21      | 47          | 9.21E-14     | 37         | NA            | NA          |
| Antigen processing-Cross presentation                                                                                       | 2.67E-21      | 51          | 1.40E-13     | 40         | NA            | NA          |
| The role of GTSE1 in G2/M progression after G2 checkpoint                                                                   | 5.29E-21      | 43          | 9.21E-14     | 34         | NA            | NA          |
| Regulation of activated PAK-2p34 by proteasome mediated degradation                                                         | 1.85E-20      | 34          | 1.89E-15     | 29         | NA            | NA          |
| RUNX1 regulates transcription of genes involved in differentiation of HSCs                                                  | 2.31E-20      | 56          | 2.89E-17     | 51         | NA            | NA          |
| Vif-mediated degradation of APOBEC3G                                                                                        | 3.82E-20      | 35          | 2.49E-15     | 30         | NA            | NA          |
| FBXL7 down-regulates AURKA during mitotic entry and in early mitosis                                                        | 3.82E-20      | 35          | 2.49E-15     | 30         | NA            | NA          |
| Negative regulation of NOTCH4 signaling                                                                                     | 3.82E-20      | 35          | 3.17E-16     | 31         | NA            | NA          |
| Cross-presentation of soluble exogenous antigens (endosomes)                                                                | 8.25E-20      | 33          | 8.21E-15     | 28         | NA            | NA          |
| SCF-beta-TrCP mediated degradation of Emi1                                                                                  | 8.25E-20      | 35          | 4.73E-15     | 30         | NA            | NA          |
| Vpu mediated degradation of CD4                                                                                             | 8.25E-20      | 34          | 6.31E-15     | 29         | NA            | NA          |
| NIK-->noncanonical NF-kB signaling                                                                                          | 1.60E-19      | 36          | 5.71E-15     | 31         | NA            | NA          |
| Regulation of Apoptosis                                                                                                     | 1.88E-19      | 34          | 1.07E-14     | 29         | NA            | NA          |
| Dectin-1 mediated noncanonical NF-kB signaling                                                                              | 3.27E-19      | 36          | 9.02E-15     | 31         | NA            | NA          |
| Regulation of RUNX3 expression and activity                                                                                 | 9.00E-19      | 34          | 2.42E-13     | 28         | NA            | NA          |
| Autodegradation of the E3 ubiquitin ligase COP1                                                                             | 9.00E-19      | 33          | 4.75E-14     | 28         | NA            | NA          |
| Ubiquitin Mediated Degradation of Phosphorylated Cdc25A                                                                     | 9.00E-19      | 33          | 4.75E-14     | 28         | NA            | NA          |
| p53-Independent DNA Damage Response                                                                                         | 9.00E-19      | 33          | 4.75E-14     | 28         | NA            | NA          |
| p53-Independent G1/S DNA damage checkpoint                                                                                  | 9.00E-19      | 33          | 4.75E-14     | 28         | NA            | NA          |
| Ubiquitin-dependent degradation of Cyclin D                                                                                 | 9.00E-19      | 33          | 4.75E-14     | 28         | NA            | NA          |
| G2/M Checkpoints                                                                                                            | 9.33E-19      | 62          | 3.55E-16     | 57         | NA            | NA          |
| SCF(Skp2)-mediated degradation of p27/p21                                                                                   | 2.83E-18      | 35          | 6.24E-14     | 30         | NA            | NA          |
| Degradation of GLI1 by the proteasome                                                                                       | 2.83E-18      | 35          | 1.32E-15     | 32         | NA            | NA          |
| Degradation of GLI2 by the proteasome                                                                                       | 2.83E-18      | 35          | 1.32E-15     | 32         | NA            | NA          |
| GLI3 is processed to GLI3R by the proteasome                                                                                | 2.83E-18      | 35          | 1.32E-15     | 32         | NA            | NA          |
| Regulation of ornithine decarboxylase (ODC)                                                                                 | 4.68E-18      | 32          | 2.14E-13     | 27         | NA            | NA          |
| Degradation of AXIN                                                                                                         | 9.02E-18      | 33          | 2.42E-13     | 28         | NA            | NA          |
| Regulation of mRNA stability by proteins that bind AU-rich elements                                                         | 1.40E-17      | 42          | 4.45E-17     | 41         | NA            | NA          |
| Oxygen-dependent proline hydroxylation of Hypoxia-inducible Factor Alpha                                                    | 1.61E-17      | 36          | 1.69E-13     | 31         | NA            | NA          |
| Hh mutants are degraded by ERAD                                                                                             | 1.83E-17      | 33          | 4.12E-13     | 28         | NA            | NA          |
| Signaling by NOTCH                                                                                                          | 3.49E-17      | 73          | 2.86E-16     | 70         | NA            | NA          |
| Degradation of DVL                                                                                                          | 3.54E-17      | 33          | 6.44E-13     | 28         | NA            | NA          |
| Stabilization of p53                                                                                                        | 3.54E-17      | 33          | 6.44E-13     | 28         | NA            | NA          |
| ROS sensing by NFE2L2                                                                                                       | 3.54E-17      | 33          | 9.40E-14     | 29         | NA            | NA          |
| Interleukin-1 signaling                                                                                                     | 4.97E-17      | 45          | 3.41E-13     | 39         | NA            | NA          |
| Hedgehog ligand biogenesis                                                                                                  | 7.20E-17      | 35          | 6.44E-13     | 30         | NA            | NA          |
| Regulation of HMOX1 expression and activity                                                                                 | 7.20E-17      | 35          | 1.04E-13     | 31         | NA            | NA          |
| CLEC7A (Dectin-1) signaling                                                                                                 | 1.28E-16      | 44          | 3.17E-16     | 43         | NA            | NA          |
| Hh mutants abrogate ligand secretion                                                                                        | 1.33E-16      | 33          | 1.76E-12     | 28         | NA            | NA          |
| CDT1 association with the CDC6:ORC:origin complex                                                                           | 1.33E-16      | 33          | 1.76E-12     | 28         | NA            | NA          |
| FCER1 mediated NF-kB activation                                                                                             | 2.25E-16      | 39          | 6.44E-13     | 34         | NA            | NA          |
| Activation of NF-kappaB in B cells                                                                                          | 2.35E-16      | 35          | 1.65E-12     | 30         | NA            | NA          |
| Defective CFTR causes cystic fibrosis                                                                                       | 4.93E-16      | 33          | 4.73E-12     | 28         | NA            | NA          |
| ECM proteoglycans                                                                                                           | 5.55E-16      | 37          | 6.33E-11     | 30         | 3.58E-05      | 10          |
| Cellular response to chemical stress                                                                                        | 6.16E-16      | 56          | 4.80E-13     | 50         | NA            | NA          |
| Regulation of RUNX2 expression and activity                                                                                 | 8.51E-16      | 36          | 2.09E-11     | 30         | NA            | NA          |
| TNFR2 non-canonical NF-kB pathway                                                                                           | 1.15E-15      | 43          | 5.56E-12     | 37         | NA            | NA          |
| Metabolism of polyamines                                                                                                    | 1.25E-15      | 32          | 1.29E-11     | 27         | NA            | NA          |
| Platelet activation, signaling and aggregation                                                                              | 1.32E-15      | 75          | 3.10E-11     | 64         | 2.33E-13      | 28          |
| Signaling by NOTCH4                                                                                                         | 1.52E-15      | 38          | 6.44E-13     | 34         | NA            | NA          |
| Orc1 removal from chromatin                                                                                                 | 2.15E-15      | 35          | 9.35E-12     | 30         | NA            | NA          |
| Degradation of the extracellular matrix                                                                                     | 2.15E-15      | 51          | 3.26E-17     | 53         | NA            | NA          |
| Cellular response to hypoxia                                                                                                | 2.30E-15      | 36          | 7.95E-12     | 31         | NA            | NA          |
| Downstream signaling events of B Cell Receptor (BCR)                                                                        | 2.36E-15      | 38          | 3.66E-14     | 36         | NA            | NA          |
| Autodegradation of Cdh1 by Cdh1:APC/C                                                                                       | 2.68E-15      | 33          | 1.87E-11     | 28         | NA            | NA          |
| Asymmetric localization of PCP proteins                                                                                     | 2.68E-15      | 33          | 2.80E-12     | 29         | NA            | NA          |
| Regulation of RAS by GAPs                                                                                                   | 3.12E-15      | 34          | 1.65E-11     | 29         | NA            | NA          |
| MAPK6/MAPK4 signaling                                                                                                       | 5.61E-15      | 39          | 6.24E-14     | 37         | NA            | NA          |
| p53-Dependent G1 DNA Damage Response                                                                                        | 8.34E-15      | 33          | 4.30E-11     | 28         | NA            | NA          |
| p53-Dependent G1/S DNA damage checkpoint                                                                                    | 8.34E-15      | 33          | 4.30E-11     | 28         | NA            | NA          |
| Signaling by Interleukins                                                                                                   | 1.02E-14      | 106         | 6.42E-13     | 98         | NA            | NA          |
| Interleukin-1 family signaling                                                                                              | 1.33E-14      | 50          | 3.32E-12     | 45         | NA            | NA          |
| Degradation of beta-catenin by the destruction complex                                                                      | 1.54E-14      | 37          | 2.91E-11     | 32         | NA            | NA          |
| APC/C:Cdc20 mediated degradation of Securin                                                                                 | 2.39E-14      | 33          | 9.42E-11     | 28         | NA            | NA          |
| Assembly of the pre-replicative complex                                                                                     | 2.39E-14      | 33          | 9.42E-11     | 28         | NA            | NA          |
| G1/S DNA Damage Checkpoints                                                                                                 | 2.39E-14      | 33          | 9.42E-11     | 28         | NA            | NA          |
| Amyloid fiber formation                                                                                                     | 3.43E-14      | 43          | 4.29E-12     | 39         | NA            | NA          |
| Apoptosis                                                                                                                   | 3.82E-14      | 57          | 3.11E-13     | 54         | NA            | NA          |
| Host Interactions of HIV factors                                                                                            | 3.82E-14      | 47          | 4.90E-11     | 41         | NA            | NA          |
| Regulation of PTEN stability and activity                                                                                   | 3.92E-14      | 33          | 1.39E-10     | 28         | NA            | NA          |
| Hedgehog 'off' state                                                                                                        | 6.96E-14      | 43          | 6.24E-10     | 36         | NA            | NA          |
| Transcriptional regulation by RUNX3                                                                                         | 1.02E-13      | 39          | 1.79E-09     | 32         | NA            | NA          |
| Formation of Fibrin Clot (Clotting Cascade)                                                                                 | 1.44E-13      | 24          | 4.05E-08     | 18         | 0.009288971   | 5           |
| UCH proteinases                                                                                                             | 1.86E-13      | 40          | 1.16E-10     | 35         | NA            | NA          |
| Downstream TCR signaling                                                                                                    | 2.22E-13      | 39          | 1.58E-10     | 34         | NA            | NA          |
| Integrin cell surface interactions                                                                                          | 2.28E-13      | 36          | 2.88E-10     | 31         | 0.002532341   | 8           |
| Regulation of APC/C activators between G1/S and early anaphase                                                              | 2.50E-13      | 35          | 3.79E-10     | 30         | NA            | NA          |
| ABC transporter disorders                                                                                                   | 2.68E-13      | 34          | 4.97E-10     | 29         | NA            | NA          |
| Cdc20:Phospho-APC/C mediated degradation of Cyclin A                                                                        | 2.75E-13      | 33          | 6.31E-10     | 28         | NA            | NA          |
| CDK-mediated phosphorylation and removal of Cdc6                                                                            | 2.75E-13      | 33          | 6.31E-10     | 28         | NA            | NA          |
| Programmed Cell Death                                                                                                       | 2.96E-13      | 61          | 1.43E-12     | 58         | NA            | NA          |
| C-type lectin receptors (CLRs)                                                                                              | 3.32E-13      | 48          | 1.87E-14     | 49         | NA            | NA          |
| APC/C:Cdh1 mediated degradation of Cdc20 and other APC/C:Cdh1 targeted proteins in late mitosis/early G1                    | 4.28E-13      | 33          | 8.96E-10     | 28         | NA            | NA          |
| APC/Cdc20 mediated degradation of cell cycle proteins prior to satisfaction of the cell cycle checkpoint                    | 4.28E-13      | 33          | 8.96E-10     | 28         | NA            | NA          |

|                                                                                                           |          |    |             |    |             |    |    |
|-----------------------------------------------------------------------------------------------------------|----------|----|-------------|----|-------------|----|----|
| Cyclin E associated events during G1/S transition                                                         | 5.62E-13 | 35 | 7.34E-10    | 30 | NA          | NA |    |
| TCR signaling                                                                                             | 7.06E-13 | 43 | 5.67E-11    | 39 | NA          | NA |    |
| APC/C:Cdc20 mediated degradation of mitotic proteins                                                      | 1.07E-12 | 33 | 1.78E-09    | 28 | NA          | NA |    |
| Signaling by the B Cell Receptor (BCR)                                                                    | 1.17E-12 | 41 | 1.26E-12    | 40 | NA          | NA |    |
| Cyclin A:Cdk2-associated events at S phase entry                                                          | 1.28E-12 | 35 | 1.37E-09    | 30 | NA          | NA |    |
| Activation of APC/C and APC/C:Cdc20 mediated degradation of mitotic proteins                              | 1.63E-12 | 33 | 2.44E-09    | 28 | NA          | NA |    |
| PCP/CE pathway                                                                                            | 3.56E-12 | 36 | 2.48E-11    | 34 | NA          | NA |    |
| Transcriptional regulation by RUNX1                                                                       | 3.87E-12 | 64 | 2.52E-09    | 56 | NA          | NA |    |
| APC/C-mediated degradation of cell cycle proteins                                                         | 4.19E-12 | 35 | 3.33E-09    | 30 | NA          | NA |    |
| Regulation of mitotic cell cycle                                                                          | 4.19E-12 | 35 | 3.33E-09    | 30 | NA          | NA |    |
| Metabolism of carbohydrates                                                                               | 5.95E-12 | 73 | 1.12E-11    | 70 | NA          | NA |    |
| G2/M Transition                                                                                           | 6.48E-12 | 56 | 7.83E-08    | 46 | NA          | NA |    |
| Mitotic G2-G2/M phases                                                                                    | 1.02E-11 | 56 | 1.08E-07    | 46 | NA          | NA |    |
| Fc epsilon receptor (FCER1) signaling                                                                     | 1.09E-11 | 44 | 3.48E-11    | 42 | NA          | NA |    |
| Cytoprotection by HMOX1                                                                                   | 1.10E-11 | 42 | 2.44E-09    | 37 | NA          | NA |    |
| Switching of origins to a post-replicative state                                                          | 1.28E-11 | 35 | 7.89E-09    | 30 | NA          | NA |    |
| Non-integrin membrane-ECM interactions                                                                    | 3.73E-11 | 27 | 3.13E-09    | 24 | 0.000241742 |    | 8  |
| Hedgehog 'on' state                                                                                       | 4.06E-11 | 33 | 6.33E-09    | 29 | NA          | NA |    |
| DNA Replication Pre-Initiation                                                                            | 4.06E-11 | 33 | 2.83E-08    | 28 | NA          | NA |    |
| Scavenging by Class A Receptors                                                                           | 4.31E-11 | 15 | 9.05E-13    | 16 | NA          | NA |    |
| Gene and protein expression by JAK-STAT signaling after Interleukin-12 stimulation                        | 9.32E-11 | 21 | 3.09E-09    | 19 | 0.048698799 |    | 4  |
| Cell surface interactions at the vascular wall                                                            | 1.02E-10 | 43 | 1.46E-06    | 34 | 4.85E-06    |    | 14 |
| TCF dependent signaling in response to WNT                                                                | 1.14E-10 | 60 | 3.37E-10    | 57 | NA          | NA |    |
| Signaling by Hedgehog                                                                                     | 1.44E-10 | 45 | 4.40E-08    | 39 | NA          | NA |    |
| ABC-family proteins mediated transport                                                                    | 1.51E-10 | 36 | 4.61E-08    | 31 | NA          | NA |    |
| Scavenging of heme from plasma                                                                            | 1.75E-10 | 12 | 4.05E-05    | 8  | NA          | NA |    |
| RHO GTPases activate PKNs                                                                                 | 2.59E-10 | 34 | 6.33E-11    | 34 | NA          | NA |    |
| Collagen degradation                                                                                      | 3.56E-10 | 27 | 1.12E-10    | 27 | NA          | NA |    |
| Packaging Of Telomere Ends                                                                                | 4.35E-10 | 24 | 1.52E-10    | 24 | NA          | NA |    |
| M Phase                                                                                                   | 7.61E-10 | 87 | 3.06E-07    | 76 | NA          | NA |    |
| Cell Cycle Checkpoints                                                                                    | 8.52E-10 | 68 | 3.36E-09    | 64 | NA          | NA |    |
| Common Pathway of Fibrin Clot Formation                                                                   | 1.27E-09 | 15 | 9.39E-05    | 10 | 0.009288971 |    | 4  |
| Interleukin-12 signaling                                                                                  | 1.95E-09 | 22 | 3.26E-08    | 20 | NA          | NA |    |
| Diseases of programmed cell death                                                                         | 2.28E-09 | 34 | 8.90E-09    | 32 | NA          | NA |    |
| Recognition and association of DNA glycosylase with site containing an affected purine                    | 2.76E-09 | 24 | 9.19E-10    | 24 | NA          | NA |    |
| Cleavage of the damaged purine                                                                            | 2.76E-09 | 24 | 9.19E-10    | 24 | NA          | NA |    |
| Depurination                                                                                              | 2.76E-09 | 24 | 9.19E-10    | 24 | NA          | NA |    |
| Diseases of metabolism                                                                                    | 2.76E-09 | 59 | 2.39E-09    | 57 | 0.005049397 |    | 13 |
| Interleukin-12 family signaling                                                                           | 4.26E-09 | 24 | 2.55E-07    | 21 | NA          | NA |    |
| Transcriptional regulation by RUNX2                                                                       | 5.72E-09 | 37 | 7.07E-07    | 32 | NA          | NA |    |
| Regulation of expression of SLTs and ROBOs                                                                | 1.87E-08 | 45 | 7.26E-07    | 40 | NA          | NA |    |
| Recognition and association of DNA glycosylase with site containing an affected pyrimidine                | 2.16E-08 | 24 | 6.71E-09    | 24 | NA          | NA |    |
| Cleavage of the damaged pyrimidine                                                                        | 2.16E-08 | 24 | 6.71E-09    | 24 | NA          | NA |    |
| Depyrimidination                                                                                          | 2.16E-08 | 24 | 6.71E-09    | 24 | NA          | NA |    |
| Elastic fibre formation                                                                                   | 3.72E-08 | 20 | 3.00E-06    | 17 | 0.002763594 |    | 6  |
| Base-Excision Repair, AP Site Formation                                                                   | 4.57E-08 | 24 | 1.39E-08    | 24 | NA          | NA |    |
| G1/S Transition                                                                                           | 6.22E-08 | 37 | 4.50E-06    | 32 | NA          | NA |    |
| Molecules associated with elastic fibres                                                                  | 6.25E-08 | 18 | 7.26E-06    | 15 | 0.008831027 |    | 5  |
| Synthesis of DNA                                                                                          | 6.25E-08 | 35 | 5.86E-06    | 30 | NA          | NA |    |
| HSP90 chaperone cycle for steroid hormone receptors (SHR)                                                 | 6.68E-08 | 22 | 0.000239457 | 16 | NA          | NA |    |
| Signaling by WNT                                                                                          | 6.88E-08 | 69 | 5.65E-11    | 74 | NA          | NA |    |
| Nonhomologous End-Joining (NHEJ)                                                                          | 7.02E-08 | 25 | 2.15E-08    | 25 | NA          | NA |    |
| Meiotic synapsis                                                                                          | 7.66E-08 | 27 | 2.17E-08    | 27 | NA          | NA |    |
| Metabolism of amino acids and derivatives                                                                 | 7.66E-08 | 75 | 0.000962166 | 58 | NA          | NA |    |
| Separation of Sister Chromatids                                                                           | 7.79E-08 | 47 | 7.64E-05    | 38 | NA          | NA |    |
| Plasma lipoprotein remodeling                                                                             | 8.53E-08 | 16 | 2.39E-06    | 14 | 0.000444061 |    | 6  |
| Plasma lipoprotein assembly, remodeling, and clearance                                                    | 9.54E-08 | 25 | 2.97E-08    | 25 | 0.004215306 |    | 7  |
| Recruitment and ATM-mediated phosphorylation of repair and signaling proteins at DNA double strand breaks | 1.86E-07 | 26 | 2.43E-07    | 25 | NA          | NA |    |
| Diseases of glycosylation                                                                                 | 2.23E-07 | 38 | 4.40E-08    | 38 | NA          | NA |    |
| RNA Polymerase I Promoter Opening                                                                         | 2.23E-07 | 23 | 7.31E-08    | 23 | NA          | NA |    |
| Inhibition of DNA recombination at telomere                                                               | 2.38E-07 | 24 | 7.50E-08    | 24 | NA          | NA |    |
| DNA Double Strand Break Response                                                                          | 2.45E-07 | 26 | 3.17E-07    | 25 | NA          | NA |    |
| Mitotic Anaphase                                                                                          | 2.47E-07 | 53 | 0.00019331  | 43 | NA          | NA |    |
| Mitotic Metaphase and Anaphase                                                                            | 2.85E-07 | 53 | 0.000211739 | 43 | NA          | NA |    |
| Signaling by ROBO receptors                                                                               | 2.94E-07 | 50 | 4.27E-08    | 50 | NA          | NA |    |
| MAPK family signaling cascades                                                                            | 3.42E-07 | 66 | 2.33E-09    | 69 | NA          | NA |    |
| DNA Replication                                                                                           | 3.43E-07 | 35 | 2.38E-05    | 30 | NA          | NA |    |
| G2/M DNA damage checkpoint                                                                                | 3.54E-07 | 29 | 9.66E-08    | 29 | NA          | NA |    |
| Beta-catenin independent WNT signaling                                                                    | 3.83E-07 | 38 | 7.12E-09    | 40 | NA          | NA |    |
| Laminin interactions                                                                                      | 3.97E-07 | 15 | 1.49E-06    | 14 | 0.023394658 |    | 4  |
| MAPK1/MAPK3 signaling                                                                                     | 4.08E-07 | 60 | 4.64E-08    | 60 | NA          | NA |    |
| DNA methylation                                                                                           | 4.08E-07 | 23 | 1.40E-07    | 23 | NA          | NA |    |
| DNA Damage/Telomere Stress Induced Senescence                                                             | 4.13E-07 | 26 | 1.28E-07    | 26 | NA          | NA |    |
| RAF/MAP kinase cascade                                                                                    | 4.41E-07 | 59 | 5.22E-08    | 59 | NA          | NA |    |
| Intrinsic Pathway of Fibrin Clot Formation                                                                | 4.53E-07 | 13 | 2.36E-06    | 12 | NA          | NA |    |
| L1CAM interactions                                                                                        | 5.45E-07 | 33 | 0.000314061 | 26 | 0.013689406 |    | 8  |
| Mitotic G1 phase and G1/S transition                                                                      | 6.54E-07 | 38 | 7.39E-05    | 32 | NA          | NA |    |
| Pre-NOTCH Expression and Processing                                                                       | 7.11E-07 | 31 | 1.91E-07    | 31 | NA          | NA |    |
| Activated PKN1 stimulates transcription of AR (androgen receptor) regulated genes KLK2 and KLK3           | 7.47E-07 | 23 | 2.64E-07    | 23 | NA          | NA |    |
| SIRT1 negatively regulates rRNA expression                                                                | 1.01E-06 | 23 | 3.55E-07    | 23 | NA          | NA |    |
| HIV Infection                                                                                             | 1.11E-06 | 51 | 3.39E-05    | 45 | NA          | NA |    |
| Regulation of TLR by endogenous ligand                                                                    | 1.21E-06 | 12 | 0.000402886 | 9  | NA          | NA |    |
| Condensation of Prophase Chromosomes                                                                      | 1.32E-06 | 24 | 4.50E-07    | 24 | NA          | NA |    |
| Collagen formation                                                                                        | 1.39E-06 | 27 | 4.32E-07    | 27 | NA          | NA |    |
| Formation of tubulin folding intermediates by CCT/TriC                                                    | 1.59E-06 | 13 | 0.001629824 | 9  | NA          | NA |    |
| RUNX1 regulates genes involved in megakaryocyte differentiation and platelet function                     | 2.01E-06 | 28 | 2.50E-05    | 25 | NA          | NA |    |
| Class I MHC mediated antigen processing & presentation                                                    | 2.12E-06 | 71 | 0.000397383 | 60 | NA          | NA |    |
| Ub-specific processing proteases                                                                          | 2.40E-06 | 48 | 3.54E-05    | 43 | NA          | NA |    |
| Neddylation                                                                                               | 2.67E-06 | 50 | 0.00015853  | 43 | NA          | NA |    |
| MET activates PTK2 signaling                                                                              | 2.96E-06 | 14 | 1.49E-06    | 14 | NA          | NA |    |
| PTEN Regulation                                                                                           | 3.26E-06 | 35 | 0.000336898 | 29 | NA          | NA |    |
| MHC class II antigen presentation                                                                         | 3.84E-06 | 32 | 0.023821381 | 21 | NA          | NA |    |
| Metabolism of nucleotides                                                                                 | 3.86E-06 | 28 | 4.29E-05    | 25 | NA          | NA |    |

|                                                                                             |             |    |             |    |             |    |   |
|---------------------------------------------------------------------------------------------|-------------|----|-------------|----|-------------|----|---|
| HCMV Early Events                                                                           | 3.88E-06    | 34 | 0.00017554  | 29 | NA          | NA |   |
| PRC2 methylates histones and DNA                                                            | 3.96E-06    | 23 | 1.46E-06    | 23 | NA          | NA |   |
| Defective pyroptosis                                                                        | 3.96E-06    | 23 | 1.46E-06    | 23 | NA          | NA |   |
| RHO GTPase Effectors                                                                        | 4.17E-06    | 63 | 7.12E-09    | 68 | NA          | NA |   |
| Signaling by PDGF                                                                           | 4.20E-06    | 20 | 1.72E-06    | 20 | 0.039349738 |    | 5 |
| Syndecan interactions                                                                       | 4.68E-06    | 13 | 0.002930495 | 9  | 0.000225937 |    | 6 |
| Deposition of new CENPA-containing nucleosomes at the centromere                            | 5.06E-06    | 23 | 1.86E-06    | 23 | NA          | NA |   |
| Nucleosome assembly                                                                         | 5.06E-06    | 23 | 1.86E-06    | 23 | NA          | NA |   |
| Immunoregulatory interactions between a Lymphoid and a non-Lymphoid cell                    | 6.51E-06    | 33 | 0.0002921   | 28 | NA          | NA |   |
| Cooperation of Prefoldin and TriC/CCT in actin and tubulin folding                          | 7.34E-06    | 14 | 0.002675233 | 10 | NA          | NA |   |
| Diseases associated with glycosaminoglycan metabolism                                       | 8.08E-06    | 16 | 3.89E-06    | 16 | NA          | NA |   |
| MET promotes cell motility                                                                  | 8.08E-06    | 16 | 6.68E-07    | 17 | NA          | NA |   |
| ERCC6 (CSB) and EHM2 (G9a) positively regulate rRNA expression                              | 8.33E-06    | 23 | 7.80E-07    | 24 | NA          | NA |   |
| Pre-NOTCH Transcription and Translation                                                     | 9.33E-06    | 26 | 8.87E-07    | 27 | NA          | NA |   |
| COPI-independent Golgi-to-ER retrograde traffic                                             | 9.83E-06    | 18 | 0.010670328 | 12 | NA          | NA |   |
| Assembly of collagen fibrils and other multimeric structures                                | 9.92E-06    | 20 | 9.23E-07    | 21 | NA          | NA |   |
| Transport to the Golgi and subsequent modification                                          | 9.96E-06    | 41 | 0.000436547 | 35 | NA          | NA |   |
| Diseases of signal transduction by growth factor receptors and second messengers            | 1.14E-05    | 71 | 5.37E-06    | 69 | NA          | NA |   |
| Asparagine N-linked glycosylation                                                           | 1.49E-05    | 58 | 0.000647254 | 50 | NA          | NA |   |
| Aggrephagy                                                                                  | 1.64E-05    | 16 | 0.007962825 | 11 | NA          | NA |   |
| Gluconeogenesis                                                                             | 1.68E-05    | 14 | 0.004327317 | 10 | NA          | NA |   |
| Signaling by MET                                                                            | 1.68E-05    | 23 | 1.68E-06    | 24 | NA          | NA |   |
| Deregulated CDK5 triggers multiple neurodegenerative pathways in Alzheimer's disease models | 1.95E-05    | 11 | 0.000600248 | 9  | 7.61E-05    |    | 6 |
| Neurodegenerative Diseases                                                                  | 1.95E-05    | 11 | 0.000600248 | 9  | 7.61E-05    |    | 6 |
| Chaperone Mediated Autophagy                                                                | 1.95E-05    | 11 | 1.21E-05    | 11 | NA          | NA |   |
| Meiotic recombination                                                                       | 2.29E-05    | 24 | 8.80E-06    | 24 | NA          | NA |   |
| Glutathione synthesis and recycling                                                         | 2.54E-05    | 8  | 0.002007169 | 6  | NA          | NA |   |
| Processing of DNA double-strand break ends                                                  | 2.54E-05    | 26 | 9.23E-06    | 26 | NA          | NA |   |
| PIP3 activates AKT signaling                                                                | 2.54E-05    | 52 | 0.000208567 | 47 | NA          | NA |   |
| Chondroitin sulfate/dermatan sulfate metabolism                                             | 3.20E-05    | 17 | 0.009060506 | 12 | NA          | NA |   |
| Glutathione conjugation                                                                     | 3.59E-05    | 14 | 0.001845358 | 11 | NA          | NA |   |
| COPI-mediated anterograde transport                                                         | 4.55E-05    | 26 | 0.002513656 | 21 | NA          | NA |   |
| Toll-like Receptor Cascades                                                                 | 4.60E-05    | 35 | 0.000208567 | 32 | NA          | NA |   |
| Prefoldin mediated transfer of substrate to CCT/TriC                                        | 5.02E-05    | 12 | 0.000908139 | 10 | NA          | NA |   |
| Detoxification of Reactive Oxygen Species                                                   | 5.11E-05    | 14 | 0.000143072 | 13 | 0.008475125 |    | 5 |
| Defective B3GALT1 causes Peters-plus syndrome (PpS)                                         | 5.11E-05    | 14 | 0.000635663 | 12 | 0.046379153 |    | 4 |
| Defective B3GAT3 causes JDSSDHD                                                             | 5.26E-05    | 10 | 0.000258445 | 9  | NA          | NA |   |
| Dissolution of Fibrin Clot                                                                  | 5.71E-05    | 8  | 0.003254419 | 6  | NA          | NA |   |
| Diseases associated with O-glycosylation of proteins                                        | 5.79E-05    | 20 | 9.49E-05    | 19 | NA          | NA |   |
| Formation of the beta-catenin:TCF transactivating complex                                   | 6.24E-05    | 24 | 2.50E-05    | 24 | NA          | NA |   |
| HCMV Infection                                                                              | 6.89E-05    | 35 | 0.001410284 | 30 | NA          | NA |   |
| O-glycosylation of TSR domain-containing proteins                                           | 7.13E-05    | 14 | 0.000817677 | 12 | 0.048698799 |    | 4 |
| Base Excision Repair                                                                        | 7.53E-05    | 24 | 3.05E-05    | 24 | NA          | NA |   |
| Disorders of transmembrane transporters                                                     | 8.74E-05    | 37 | 0.000698581 | 33 | NA          | NA |   |
| S Phase                                                                                     | 9.00E-05    | 35 | 0.001685437 | 30 | NA          | NA |   |
| Retinoid metabolism and transport                                                           | 0.000102323 | 15 | 0.003098587 | 12 | 0.013689406 |    | 5 |
| Interconversion of nucleotide di- and triphosphates                                         | 0.000110685 | 12 | 0.001587191 | 10 | NA          | NA |   |
| CS/DS degradation                                                                           | 0.000115908 | 8  | 0.000755221 | 7  | NA          | NA |   |
| Deubiquitination                                                                            | 0.000122016 | 54 | 0.001241469 | 48 | NA          | NA |   |
| A tetrasaccharide linker sequence is required for GAG synthesis                             | 0.000129489 | 11 | 0.00219405  | 9  | NA          | NA |   |
| Post-chaperonin tubulin folding pathway                                                     | 0.000142712 | 10 | NA          | NA | NA          | NA |   |
| Transcriptional regulation of granulopoiesis                                                | 0.000156027 | 23 | 6.60E-05    | 23 | NA          | NA |   |
| Collagen biosynthesis and modifying enzymes                                                 | 0.000159742 | 19 | 7.62E-05    | 19 | NA          | NA |   |
| ER to Golgi Anterograde Transport                                                           | 0.00017853  | 33 | 0.00655574  | 27 | NA          | NA |   |
| B-WICH complex positively regulates rRNA expression                                         | 0.00018563  | 23 | 2.50E-05    | 24 | NA          | NA |   |
| RNA Polymerase I Promoter Escape                                                            | 0.00018563  | 23 | 2.50E-05    | 24 | NA          | NA |   |
| Mitotic Prophase                                                                            | 0.000207357 | 31 | 7.16E-05    | 31 | NA          | NA |   |
| Pentose phosphate pathway                                                                   | 0.000216613 | 8  | 0.001219647 | 7  | NA          | NA |   |
| Recycling pathway of L1                                                                     | 0.000235207 | 15 | 0.015736693 | 11 | NA          | NA |   |
| Glycosaminoglycan metabolism                                                                | 0.000252833 | 28 | 0.000246678 | 27 | NA          | NA |   |
| Complement cascade                                                                          | 0.000252833 | 17 | 1.22E-08    | 23 | NA          | NA |   |
| Meiosis                                                                                     | 0.000266728 | 27 | 0.000103247 | 27 | NA          | NA |   |
| Transcriptional regulation by small RNAs                                                    | 0.000293402 | 25 | 0.000120101 | 25 | NA          | NA |   |
| Metabolism of fat-soluble vitamins                                                          | 0.000303638 | 15 | 0.006534901 | 12 | 0.019256708 |    | 5 |
| Ethanol oxidation                                                                           | 0.000307735 | 7  | NA          | NA | NA          | NA |   |
| HDACs deacetylate histones                                                                  | 0.000308893 | 23 | 0.000135438 | 23 | NA          | NA |   |
| Defective B4GALT7 causes EDS, progeroid type                                                | 0.000376111 | 9  | 0.001548229 | 8  | NA          | NA |   |
| Defective B3GALT6 causes EDS P2 and SEMDJL1                                                 | 0.000376111 | 9  | 0.001548229 | 8  | NA          | NA |   |
| Translocation of SLC2A4 (GLUT4) to the plasma membrane                                      | 0.00044238  | 19 | 0.001837812 | 17 | NA          | NA |   |
| Glucose metabolism                                                                          | 0.000528749 | 22 | 0.001648163 | 20 | NA          | NA |   |
| Estrogen-dependent gene expression                                                          | 0.000582822 | 31 | 0.002213128 | 28 | NA          | NA |   |
| Advanced glycosylation endproduct receptor signaling                                        | 0.000588928 | 7  | 0.003254419 | 6  | NA          | NA |   |
| RHOBTB GTPase Cycle                                                                         | 0.000588928 | 12 | 0.001485548 | 11 | NA          | NA |   |
| O-linked glycosylation                                                                      | 0.000623949 | 25 | 0.001573624 | 23 | NA          | NA |   |
| MyD88 deficiency (TLR2/4)                                                                   | 0.000632962 | 8  | 0.014323589 | 6  | NA          | NA |   |
| Intracellular signaling by second messengers                                                | 0.000643979 | 53 | 1.82E-05    | 56 | NA          | NA |   |
| Senescence-Associated Secretory Phenotype (SASP)                                            | 0.000717819 | 25 | 0.000300099 | 25 | NA          | NA |   |
| Removal of aminoterminal propeptides from gamma-carboxylated proteins                       | 0.000826653 | 6  | 0.000638339 | 6  | NA          | NA |   |
| Chylomicron assembly                                                                        | 0.000826653 | 6  | 0.000638339 | 6  | 0.010004681 |    | 3 |
| Chylomicron remodeling                                                                      | 0.000826653 | 6  | 0.000638339 | 6  | 0.010004681 |    | 3 |
| HDL remodeling                                                                              | 0.000826653 | 6  | 4.64E-05    | 7  | NA          | NA |   |
| Regulation of Complement cascade                                                            | 0.000881679 | 14 | 2.97E-05    | 16 | NA          | NA |   |
| Microtubule-dependent trafficking of connexons from Golgi to the plasma membrane            | 0.001002007 | 8  | NA          | NA | NA          | NA |   |
| IRAK4 deficiency (TLR2/4)                                                                   | 0.001002007 | 8  | 0.018949236 | 6  | NA          | NA |   |
| Interleukin-4 and Interleukin-13 signaling                                                  | 0.00100795  | 24 | 0.005644107 | 21 | NA          | NA |   |
| Attenuation phase                                                                           | 0.001020949 | 7  | 0.005000985 | 6  | NA          | NA |   |
| TGF-beta receptor signaling activates SMADS                                                 | 0.001043282 | 11 | 0.002675233 | 10 | NA          | NA |   |
| Toll Like Receptor 4 (TLR4) Cascade                                                         | 0.00107709  | 28 | 0.000982359 | 27 | NA          | NA |   |
| Reproduction                                                                                | 0.001253369 | 29 | 0.001092839 | 28 | NA          | NA |   |
| RHOBTB2 GTPase cycle                                                                        | 0.001264327 | 9  | 0.000862559 | 9  | NA          | NA |   |
| Plasma lipoprotein clearance                                                                | 0.001399953 | 11 | 0.003372905 | 10 | NA          | NA |   |
| Transport of connexons to the plasma membrane                                               | 0.001524045 | 8  | NA          | NA | NA          | NA |   |
| LDL clearance                                                                               | 0.001524045 | 8  | 0.024470873 | 6  | NA          | NA |   |

|                                                                                      |             |    |             |    |             |    |
|--------------------------------------------------------------------------------------|-------------|----|-------------|----|-------------|----|
| Collagen chain trimerization                                                         | 0.001556626 | 13 | 0.000920395 | 13 | NA          | NA |
| Endosomal/Vacuolar pathway                                                           | 0.001571254 | 6  | 0.049623749 | 4  | NA          | NA |
| Gamma-carboxylation, transport, and amino-terminal cleavage of proteins              | 0.001571254 | 6  | 0.001196477 | 6  | NA          | NA |
| Oxidative Stress Induced Senescence                                                  | 0.001640441 | 26 | 0.000691473 | 26 | NA          | NA |
| Activation of BAD and translocation to mitochondria                                  | 0.001658641 | 7  | 0.000156212 | 8  | NA          | NA |
| GRB2:SOS provides linkage to MAPK signaling for Integrins                            | 0.001658641 | 7  | NA          | NA | NA          | NA |
| Platelet Adhesion to exposed collagen                                                | 0.001658641 | 7  | 0.035312991 | 5  | 0.028806283 | 3  |
| HDMs demethylate histones                                                            | 0.001680419 | 14 | 0.00097685  | 14 | NA          | NA |
| Platelet Aggregation (Plug Formation)                                                | 0.001680419 | 12 | NA          | NA | NA          | NA |
| RHO GTPases activate PAKs                                                            | 0.001756173 | 9  | 3.37E-05    | 11 | NA          | NA |
| Positive epigenetic regulation of rRNA expression                                    | 0.0018227   | 23 | 0.000120101 | 25 | NA          | NA |
| Telomere Maintenance                                                                 | 0.0019187   | 24 | 0.000863046 | 24 | NA          | NA |
| Antigen processing: Ubiquitination & Proteasome degradation                          | 0.001988697 | 51 | 0.007767537 | 46 | NA          | NA |
| NoRC negatively regulates rRNA expression                                            | 0.002078402 | 23 | 0.000959129 | 23 | NA          | NA |
| Chondroitin sulfate biosynthesis                                                     | 0.002193527 | 8  | 0.031175551 | 6  | NA          | NA |
| Antimicrobial peptides                                                               | 0.002420953 | 21 | 0.001168376 | 21 | NA          | NA |
| Defects of contact activation system (CAS) and kallikrein/kinin system (KKS)         | 0.002587482 | 7  | 0.001841868 | 7  | NA          | NA |
| Diseases of hemostasis                                                               | 0.002587482 | 7  | 0.001841868 | 7  | NA          | NA |
| HCMV Late Events                                                                     | 0.002796947 | 24 | 0.001244581 | 24 | NA          | NA |
| SUMOylation of chromatin organization proteins                                       | 0.002997977 | 17 | 0.001573624 | 17 | NA          | NA |
| Glycolysis                                                                           | 0.002997977 | 17 | 0.001573624 | 17 | NA          | NA |
| Negative epigenetic regulation of rRNA expression                                    | 0.003038265 | 23 | 0.001402057 | 23 | NA          | NA |
| RNA Polymerase I Promoter Clearance                                                  | 0.003038265 | 23 | 0.000587807 | 24 | NA          | NA |
| Gene Silencing by RNA                                                                | 0.003272849 | 27 | 0.001381685 | 27 | NA          | NA |
| Toll Like Receptor TLR1:TLR2 Cascade                                                 | 0.003300637 | 22 | 0.007962825 | 20 | NA          | NA |
| Toll Like Receptor 2 (TLR2) Cascade                                                  | 0.003300637 | 22 | 0.007962825 | 20 | NA          | NA |
| Gamma carboxylation, hypusine formation and arylsulfatase activation                 | 0.003340833 | 12 | 0.006679624 | 11 | NA          | NA |
| HDR through Homologous Recombination (HRR) or Single Strand Annealing (SSA)          | 0.003611063 | 26 | 0.001557407 | 26 | NA          | NA |
| RNA Polymerase I Transcription                                                       | 0.003869433 | 23 | 0.000755818 | 24 | NA          | NA |
| EPH-Ephrin signaling                                                                 | 0.003872328 | 20 | 2.53E-06    | 26 | NA          | NA |
| RHO GTPases activate IQGAPs                                                          | 0.004156637 | 10 | 0.002675233 | 10 | NA          | NA |
| Infection with Mycobacterium tuberculosis                                            | 0.004316415 | 9  | 0.011557951 | 8  | NA          | NA |
| Erythrocytes take up carbon dioxide and release oxygen                               | 0.004316415 | 6  | 0.000436547 | 7  | NA          | NA |
| O2/CO2 exchange in erythrocytes                                                      | 0.004316415 | 6  | 0.000436547 | 7  | NA          | NA |
| Trafficking and processing of endosomal TLR                                          | 0.004316415 | 6  | 0.019354134 | 5  | NA          | NA |
| Keratan sulfate degradation                                                          | 0.004316415 | 6  | 4.05E-05    | 8  | NA          | NA |
| Purine salvage                                                                       | 0.004316415 | 6  | 0.019354134 | 5  | NA          | NA |
| Chk1/Chk2(Cds1) mediated inactivation of Cyclin B:Cdk1 complex                       | 0.004316415 | 6  | 0.003254419 | 6  | NA          | NA |
| Heparan sulfate/heparin (HS-GAG) metabolism                                          | 0.004316415 | 14 | 0.045848681 | 11 | NA          | NA |
| Post-translational modification: synthesis of GPI-anchored proteins                  | 0.004324987 | 20 | 0.011705452 | 18 | NA          | NA |
| Selective autophagy                                                                  | 0.005057682 | 18 | NA          | NA | NA          | NA |
| Activation of Matrix Metalloproteinases                                              | 0.00523388  | 10 | 0.003372905 | 10 | NA          | NA |
| Pre-NOTCH Processing in Golgi                                                        | 0.005498592 | 7  | 0.003974798 | 7  | NA          | NA |
| Metabolism of Angiotensinogen to Angiotensins                                        | 0.005498592 | 7  | NA          | NA | NA          | NA |
| Sulfur amino acid metabolism                                                         | 0.005658755 | 9  | NA          | NA | NA          | NA |
| Phase II - Conjugation of compounds                                                  | 0.005924181 | 22 | 0.026648914 | 19 | NA          | NA |
| NCAM signaling for neurite out-growth                                                | 0.005924181 | 15 | 0.00334773  | 15 | NA          | NA |
| Keratan sulfate/keratin metabolism                                                   | 0.006615454 | 10 | 5.20E-05    | 13 | NA          | NA |
| Homology Directed Repair                                                             | 0.00663756  | 26 | 0.002930495 | 26 | NA          | NA |
| Gamma-carboxylation of protein precursors                                            | 0.007221244 | 5  | 0.005603758 | 5  | NA          | NA |
| Folding of actin by CCT/TriC                                                         | 0.007221244 | 5  | 4.64E-05    | 7  | NA          | NA |
| Metabolism of vitamins and cofactors                                                 | 0.007226646 | 33 | 0.009694596 | 31 | NA          | NA |
| Glycogen metabolism                                                                  | 0.007284199 | 9  | 0.00496138  | 9  | NA          | NA |
| Apoptotic execution phase                                                            | 0.007335592 | 13 | 0.00443201  | 13 | NA          | NA |
| Assembly of active LPL and LIPC lipase complexes                                     | 0.007676325 | 7  | 0.005557148 | 7  | NA          | NA |
| Triglyceride catabolism                                                              | 0.00772085  | 8  | 0.000221681 | 10 | NA          | NA |
| Semaphorin interactions                                                              | 0.008021306 | 15 | 0.001648163 | 16 | 0.002763594 | 7  |
| Signaling by Nuclear Receptors                                                       | 0.008040292 | 47 | 0.002470854 | 47 | NA          | NA |
| Golgi-to-ER retrograde transport                                                     | 0.008087523 | 25 | NA          | NA | NA          | NA |
| GPVI-mediated activation cascade                                                     | 0.008120336 | 10 | 0.017683844 | 9  | NA          | NA |
| Biological oxidations                                                                | 0.008241539 | 37 | NA          | NA | NA          | NA |
| trans-Golgi Network Vesicle Budding                                                  | 0.008646441 | 16 | NA          | NA | NA          | NA |
| Signaling by CSF3 (G-CSF)                                                            | 0.009190361 | 9  | 0.021558731 | 8  | NA          | NA |
| Prolactin receptor signaling                                                         | 0.009696333 | 6  | 0.007312466 | 6  | NA          | NA |
| p130Cas linkage to MAPK signaling for integrins                                      | 0.009696333 | 6  | NA          | NA | NA          | NA |
| Activation of anterior HOX genes in hindbrain development during early embryogenesis | 0.010045639 | 23 | 0.004880256 | 23 | NA          | NA |
| Activation of HOX genes during differentiation                                       | 0.010045639 | 23 | 0.004880256 | 23 | NA          | NA |
| Receptor-type tyrosine-protein phosphatases                                          | 0.010350013 | 7  | 0.007560886 | 7  | NA          | NA |
| NCAM1 interactions                                                                   | 0.010350013 | 11 | 0.006679624 | 11 | NA          | NA |
| MyD88:MAL(TIRAP) cascade initiated on plasma membrane                                | 0.011176935 | 20 | 0.025834797 | 18 | NA          | NA |
| Toll Like Receptor TLR6:TLR2 Cascade                                                 | 0.011176935 | 20 | 0.025834797 | 18 | NA          | NA |
| Dermatan sulfate biosynthesis                                                        | 0.011393367 | 5  | 0.008959336 | 5  | NA          | NA |
| DNA Double-Strand Break Repair                                                       | 0.012445536 | 29 | 0.010202569 | 28 | NA          | NA |
| Downregulation of TGF-beta receptor signaling                                        | 0.012885256 | 8  | NA          | NA | NA          | NA |
| Nuclear Envelope (NE) Reassembly                                                     | 0.012885256 | 16 | NA          | NA | NA          | NA |
| Glycogen synthesis                                                                   | 0.013695241 | 6  | NA          | NA | NA          | NA |
| Signal regulatory protein family interactions                                        | 0.013695241 | 6  | 0.001841868 | 7  | NA          | NA |
| Signal transduction by L1                                                            | 0.013784594 | 7  | NA          | NA | 0.008699543 | 4  |
| ESR-mediated signaling                                                               | 0.015324819 | 36 | 0.003254419 | 37 | NA          | NA |
| Metabolism of porphyrins                                                             | 0.016392045 | 8  | NA          | NA | NA          | NA |
| Integrin signaling                                                                   | 0.016392045 | 8  | NA          | NA | NA          | NA |
| Caspase-mediated cleavage of cytoskeletal proteins                                   | 0.017245803 | 5  | NA          | NA | NA          | NA |
| HSF1 activation                                                                      | 0.017245803 | 5  | 0.013662988 | 5  | NA          | NA |
| GP1b-IX-V activation signalling                                                      | 0.017245803 | 5  | NA          | NA | NA          | NA |
| Purine ribonucleoside monophosphate biosynthesis                                     | 0.017245803 | 5  | 0.002007169 | 6  | NA          | NA |
| TAK1 activates Nf-kB by phosphorylation and activation of IKKs complex               | 0.017495455 | 9  | 0.03665047  | 8  | NA          | NA |
| Intra-Golgi and retrograde Golgi-to-ER traffic                                       | 0.0176637   | 33 | NA          | NA | NA          | NA |
| Signaling by ERBB2 TMD/JMD mutants                                                   | 0.017941042 | 7  | 0.047323229 | 6  | NA          | NA |
| PKMTs methylate histone lysines                                                      | 0.017966218 | 15 | 0.010645707 | 15 | NA          | NA |
| Glycosphingolipid metabolism                                                         | 0.020745945 | 11 | 0.035510466 | 10 | NA          | NA |
| Autophagy                                                                            | 0.020898154 | 26 | NA          | NA | NA          | NA |
| RMTs methylate histone arginines                                                     | 0.020957759 | 16 | 0.012080994 | 16 | NA          | NA |
| Nucleotide salvage                                                                   | 0.023154118 | 7  | 0.016859694 | 7  | NA          | NA |

|                                                                              |             |    |             |    |             |    |
|------------------------------------------------------------------------------|-------------|----|-------------|----|-------------|----|
| RHOBTB1 GTPase cycle                                                         | 0.023154118 | 7  | 0.016859694 | 7  | NA          | NA |
| Activation of AMPK downstream of NMDARs                                      | 0.025332545 | 8  | NA          | NA | NA          | NA |
| Signaling by TGFβ family members                                             | 0.02595621  | 19 | NA          | NA | NA          | NA |
| Regulation of PLK1 Activity at G2/M Transition                               | 0.026510185 | 17 | NA          | NA | NA          | NA |
| HSF1-dependent transactivation                                               | 0.029516368 | 7  | 0.00542735  | 8  | NA          | NA |
| Activation of BH3-only proteins                                              | 0.031072616 | 8  | 0.00628775  | 9  | NA          | NA |
| EPHA-mediated growth cone collapse                                           | 0.031072616 | 8  | NA          | NA | 0.023394658 | 4  |
| Chromosome Maintenance                                                       | 0.03153092  | 24 | 0.015672058 | 24 | NA          | NA |
| Ephrin signaling                                                             | 0.033017058 | 6  | 0.005557148 | 7  | NA          | NA |
| Plasma lipoprotein assembly                                                  | 0.033017058 | 6  | 0.000161907 | 9  | 0.048999353 | 3  |
| Methylation                                                                  | 0.034678478 | 5  | 0.026460847 | 5  | NA          | NA |
| Heme biosynthesis                                                            | 0.034678478 | 5  | NA          | NA | NA          | NA |
| Golgi Associated Vesicle Biogenesis                                          | 0.034768198 | 12 | NA          | NA | NA          | NA |
| IKK complex recruitment mediated by RIP1                                     | 0.036265016 | 7  | 0.00706967  | 8  | NA          | NA |
| Signaling by ERBB2 KD Mutants                                                | 0.036265016 | 7  | NA          | NA | NA          | NA |
| Inactivation of CSF3 (G-CSF) signaling                                       | 0.036265016 | 7  | NA          | NA | NA          | NA |
| Antigen Presentation: Folding, assembly and peptide loading of class I MHC   | 0.036265016 | 7  | NA          | NA | NA          | NA |
| Diseases of Immune System                                                    | 0.036819132 | 8  | NA          | NA | NA          | NA |
| Uptake and actions of bacterial toxins                                       | 0.036819132 | 8  | 0.007844962 | 9  | NA          | NA |
| Diseases associated with the TLR signaling cascade                           | 0.036819132 | 8  | NA          | NA | NA          | NA |
| Sealing of the nuclear envelope (NE) by ESCRT-III                            | 0.036819132 | 8  | NA          | NA | NA          | NA |
| Cell-Cell communication                                                      | 0.039665264 | 22 | 0.001117136 | 26 | NA          | NA |
| Apoptotic cleavage of cellular proteins                                      | 0.042669498 | 9  | 0.02915956  | 9  | NA          | NA |
| DNA Damage Recognition in GG-NER                                             | 0.042669498 | 9  | 0.02915956  | 9  | NA          | NA |
| EPH-ephrin mediated repulsion of cells                                       | 0.042769695 | 11 | 0.010670328 | 12 | NA          | NA |
| Signaling by ERBB2 in Cancer                                                 | 0.044033774 | 7  | NA          | NA | NA          | NA |
| Purinergic signaling in leishmaniasis infection                              | 0.044033774 | 7  | NA          | NA | NA          | NA |
| Cell recruitment (pro-inflammatory response)                                 | 0.044033774 | 7  | NA          | NA | NA          | NA |
| Iron uptake and transport                                                    | 0.044033774 | 12 | 0.011449431 | 13 | NA          | NA |
| Urea cycle                                                                   | 0.044990414 | 4  | NA          | NA | NA          | NA |
| Signaling by NOTCH1 HD Domain Mutants in Cancer                              | 0.045086085 | 5  | 0.035312991 | 5  | NA          | NA |
| Constitutive Signaling by NOTCH1 HD Domain Mutants                           | 0.045086085 | 5  | 0.035312991 | 5  | NA          | NA |
| ERBB2 Regulates Cell Motility                                                | 0.045086085 | 5  | NA          | NA | NA          | NA |
| Nucleobase biosynthesis                                                      | 0.045086085 | 5  | 0.007312466 | 6  | NA          | NA |
| Recruitment of NuMA to mitotic centrosomes                                   | 0.046770436 | 17 | NA          | NA | NA          | NA |
| TP53 Regulates Metabolic Genes                                               | 0.047968599 | 16 | NA          | NA | NA          | NA |
| Signaling by TGF-beta Receptor Complex                                       | 0.049572079 | 14 | NA          | NA | NA          | NA |
| Smooth Muscle Contraction                                                    | NA          | NA | 1.53E-05    | 15 | 0.010004681 | 5  |
| Initial triggering of complement                                             | NA          | NA | 2.09E-05    | 11 | NA          | NA |
| DARPP-32 events                                                              | NA          | NA | 0.000473668 | 10 | NA          | NA |
| Striated Muscle Contraction                                                  | NA          | NA | 0.000480462 | 12 | NA          | NA |
| EPHB-mediated forward signaling                                              | NA          | NA | 0.000582218 | 13 | NA          | NA |
| Calcineurin activates NFAT                                                   | NA          | NA | 0.001196477 | 6  | NA          | NA |
| eNOS activation                                                              | NA          | NA | 0.003254419 | 6  | NA          | NA |
| Adherens junctions interactions                                              | NA          | NA | 0.003372905 | 10 | NA          | NA |
| Keratan sulfate biosynthesis                                                 | NA          | NA | 0.003811283 | 9  | NA          | NA |
| Creation of C4 and C2 activators                                             | NA          | NA | 0.005000985 | 6  | NA          | NA |
| CREB1 phosphorylation through the activation of Adenylate Cyclase            | NA          | NA | 0.005000985 | 6  | NA          | NA |
| Fcγ receptor (FCγR) dependent phagocytosis                                   | NA          | NA | 0.005139349 | 18 | NA          | NA |
| Regulation of actin dynamics for phagocytic cup formation                    | NA          | NA | 0.006691711 | 14 | NA          | NA |
| Triglyceride metabolism                                                      | NA          | NA | 0.008044861 | 10 | NA          | NA |
| CaMK IV-mediated phosphorylation of CREB                                     | NA          | NA | 0.013662988 | 5  | NA          | NA |
| Metabolism of nitric oxide: NOS3 activation and regulation                   | NA          | NA | 0.014323589 | 6  | NA          | NA |
| Signaling by BRAF and RAF fusions                                            | NA          | NA | 0.015611743 | 14 | NA          | NA |
| Epigenetic regulation of gene expression                                     | NA          | NA | 0.015736693 | 25 | NA          | NA |
| Signaling by moderate kinase activity BRAF mutants                           | NA          | NA | 0.015736693 | 11 | NA          | NA |
| Signaling by RAS mutants                                                     | NA          | NA | 0.015736693 | 11 | NA          | NA |
| Paradoxical activation of RAF signaling by kinase inactive BRAF              | NA          | NA | 0.015736693 | 11 | NA          | NA |
| Signaling downstream of RAS mutants                                          | NA          | NA | 0.015736693 | 11 | NA          | NA |
| HATs acetylate histones                                                      | NA          | NA | 0.01684925  | 24 | NA          | NA |
| Downstream signal transduction                                               | NA          | NA | 0.017806081 | 8  | NA          | NA |
| Crosslinking of collagen fibrils                                             | NA          | NA | 0.018949236 | 6  | NA          | NA |
| Uptake and function of anthrax toxins                                        | NA          | NA | 0.019354134 | 5  | NA          | NA |
| Cell junction organization                                                   | NA          | NA | 0.020432009 | 17 | NA          | NA |
| RHO GTPases Activate WASPs and WAVES                                         | NA          | NA | 0.021079591 | 9  | NA          | NA |
| RAF activation                                                               | NA          | NA | 0.021079591 | 9  | NA          | NA |
| Cytosolic tRNA aminoacylation                                                | NA          | NA | 0.02121053  | 7  | NA          | NA |
| MyD88-independent TLR4 cascade                                               | NA          | NA | 0.021474363 | 18 | NA          | NA |
| TRIF(TICAM1)-mediated TLR4 signaling                                         | NA          | NA | 0.021474363 | 18 | NA          | NA |
| Clathrin-mediated endocytosis                                                | NA          | NA | 0.022928951 | 24 | NA          | NA |
| Signaling by RAF1 mutants                                                    | NA          | NA | 0.023135898 | 10 | NA          | NA |
| Protein methylation                                                          | NA          | NA | 0.024470873 | 6  | NA          | NA |
| Calmodulin induced events                                                    | NA          | NA | 0.02479162  | 9  | NA          | NA |
| CaM pathway                                                                  | NA          | NA | 0.02479162  | 9  | NA          | NA |
| Activated NOTCH1 Transmits Signal to the Nucleus                             | NA          | NA | 0.025961493 | 8  | NA          | NA |
| Cellular Senescence                                                          | NA          | NA | 0.027033861 | 30 | NA          | NA |
| PKA activation                                                               | NA          | NA | 0.031175551 | 6  | NA          | NA |
| Parasite infection                                                           | NA          | NA | 0.031816869 | 12 | NA          | NA |
| Leishmania phagocytosis                                                      | NA          | NA | 0.031816869 | 12 | NA          | NA |
| FCGR3A-mediated phagocytosis                                                 | NA          | NA | 0.031816869 | 12 | NA          | NA |
| Ca-dependent events                                                          | NA          | NA | 0.034214398 | 9  | NA          | NA |
| Anchoring fibril formation                                                   | NA          | NA | 0.035312991 | 5  | NA          | NA |
| CREB1 phosphorylation through the activation of CaMKII/CaMKK/CaMKIV cascade  | NA          | NA | 0.036049905 | 4  | NA          | NA |
| STAT5 activation downstream of FLT3 ITD mutants                              | NA          | NA | 0.036049905 | 4  | NA          | NA |
| VEGFR2 mediated cell proliferation                                           | NA          | NA | 0.038871267 | 6  | NA          | NA |
| PI3P, PP2A and IER3 Regulate PI3K/AKT Signaling                              | NA          | NA | 0.039986865 | 18 | NA          | NA |
| TRAF6 mediated induction of NFκB and MAP kinases upon TLR7/8 or 9 activation | NA          | NA | 0.041540161 | 16 | NA          | NA |
| VEGFA-VEGFR2 Pathway                                                         | NA          | NA | 0.042747921 | 17 | NA          | NA |
| Oncogenic MAPK signaling                                                     | NA          | NA | 0.043998945 | 15 | NA          | NA |
| Muscle contraction                                                           | NA          | NA | 0.045104075 | 29 | NA          | NA |
| MyD88 dependent cascade initiated on endosome                                | NA          | NA | 0.045473832 | 16 | NA          | NA |
| Spry regulation of FGF signaling                                             | NA          | NA | 0.045764395 | 5  | NA          | NA |
| Sema3A PAK dependent Axon repulsion                                          | NA          | NA | 0.045764395 | 5  | NA          | NA |

|                                                             |    |    |             |    |             |    |
|-------------------------------------------------------------|----|----|-------------|----|-------------|----|
| Signaling by ERBB2 ECD mutants                              | NA | NA | 0.045764395 | 5  | NA          | NA |
| Interleukin-3, Interleukin-5 and GM-CSF signaling           | NA | NA | 0.046079633 | 10 | NA          | NA |
| Translation of structural proteins                          | NA | NA | 0.046096413 | 7  | NA          | NA |
| Signaling by VEGF                                           | NA | NA | 0.04667717  | 18 | NA          | NA |
| PKA-mediated phosphorylation of CREB                        | NA | NA | 0.047323229 | 6  | NA          | NA |
| NOTCH2 Activation and Transmission of Signal to the Nucleus | NA | NA | 0.047323229 | 6  | NA          | NA |
| Toll Like Receptor 7/8 (TLR7/8) Cascade                     | NA | NA | 0.048861225 | 16 | NA          | NA |
| Regulation of localization of FOXO transcription factors    | NA | NA | 0.049623749 | 4  | NA          | NA |
| Constitutive Signaling by Overexpressed ERBB2               | NA | NA | 0.049623749 | 4  | NA          | NA |
| N-glycan trimming in the ER and Calnexin/Calreticulin cycle | NA | NA | 0.049623749 | 8  | NA          | NA |
| Sema4D induced cell migration and growth-cone collapse      | NA | NA | NA          | NA | 0.000823938 | 5  |
| Sema4D in semaphorin signaling                              | NA | NA | NA          | NA | 0.001896423 | 5  |
| PECAM1 interactions                                         | NA | NA | NA          | NA | 0.016233959 | 3  |
| Metabolic disorders of biological oxidation enzymes         | NA | NA | NA          | NA | 0.03563081  | 4  |
| Other semaphorin interactions                               | NA | NA | NA          | NA | 0.048999353 | 3  |

# Supplemental Table III:

| Metabolite                            | N_HC | N_Mild | N_Severe | Mean_HC  | Mean_Mild     | Mean_Severe  | Log2FC_MvsHC | Log2FC_SvsHC | Log2FC_SvsM  | Adj_Pvalue_MvsHC | Adj_Pvalue_SvsHC | Adj_Pvalue_SvsM |
|---------------------------------------|------|--------|----------|----------|---------------|--------------|--------------|--------------|--------------|------------------|------------------|-----------------|
| 1 1,5-anhydroglucitol*                | 39   | 74     | 33       | 2.258717 | 2.23249644    | 1.100972136  | -0.026467215 | -1.157744723 | -1.131277508 | 0.990340108      | 9.24E-06         | 9.67E-07        |
| 2 1H-pyrrole-2,5-dione*               | 39   | 74     | 33       | 3.569952 | 3.157935613   | 2.818393171  | -0.412016615 | -0.751559057 | -0.339542442 | 0.342165897      | 0.085338469      | 0.520074093     |
| 3 2,4-dihydroxybutanoic acid*         | 39   | 74     | 33       | -3.53612 | -3.514166238  | -3.62395165  | 0.021949489  | -0.087835923 | -0.109785412 | 0.976275601      | 0.876460787      | 0.586679931     |
| 4 2-aminobutanoic acid                | 39   | 74     | 33       | 0.865915 | 0.684656532   | 0.495757932  | -0.181258372 | -0.370156972 | -0.1888986   | 0.707386211      | 0.366665795      | 0.714615413     |
| 5 2-aminomalonic acid*                | 39   | 74     | 33       | -2.74367 | -2.835537866  | -2.786744639 | -0.091869762 | -0.043076535 | 0.048793227  | 0.883232649      | 0.981069368      | 0.969180576     |
| 6 2-hydroxybutyric acid               | 39   | 74     | 33       | -0.98074 | -0.899189477  | -0.699341749 | 0.081554667  | 0.281402395  | 0.199847728  | 0.842062382      | 0.243307625      | 0.400498211     |
| 7 2-hydroxyisopentanoic acid*         | 39   | 74     | 33       | 0.965316 | 1.014410903   | 0.952162693  | 0.04909462   | -0.101315359 | -0.06224821  | 0.88022827       | 0.993605071      | 0.832689392     |
| 8 2-ketoliscaproic acid               | 39   | 74     | 33       | -2.3118  | -2.197012565  | -2.542510069 | 0.114787908  | -0.230709595 | -0.345497504 | 0.448443292      | 0.107182405      | 0.002141952     |
| 9 3,4-dihydroxybutanoic acid*         | 39   | 74     | 33       | -3.22469 | -3.309905283  | -2.764042942 | -0.085211429 | 0.460650913  | 0.545862341  | 0.854058771      | 0.043854951      | 0.004192373     |
| 10 3-aminopiperidine-2,6-dione*       | 39   | 74     | 33       | 4.379419 | 4.443755751   | 3.933498653  | 0.06433663   | -0.445920469 | -0.510257098 | 0.798289449      | 0.000856348      | 1.18E-05        |
| 11 5-methylthiophanin*                | 39   | 74     | 33       | -0.5709  | -0.562861429  | -0.873622542 | 0.008039145  | -0.302721967 | -0.310761112 | 0.996610301      | 0.038555346      | 0.013132951     |
| 12 acetic acid                        | 39   | 74     | 33       | -0.91178 | -0.76602275   | -1.023482957 | 0.145760602  | -0.111699605 | -0.257460208 | 0.547399609      | 0.779881244      | 0.189936174     |
| 13 adipic acid (contaminated?)        | 39   | 74     | 33       | -1.68085 | -1.5223894823 | -1.630778038 | 0.156950418  | 0.050067202  | -0.106883216 | 0.603326527      | 0.964475122      | 0.105245272     |
| 14 alpha-tocopherol                   | 39   | 74     | 33       | 2.330629 | 1.411284926   | 1.469777338  | -0.919343904 | -0.680851492 | 0.058492412  | 0.000166724      | 0.004605037      | 0.962634413     |
| 15 benzoic acid                       | 39   | 74     | 33       | 0.707619 | 0.634729448   | 0.504074364  | -0.072889592 | -0.203544676 | -0.130655084 | 0.699129537      | 0.146444137      | 0.360463572     |
| 16 beta-alanine                       | 39   | 74     | 33       | -2.17937 | -1.959309062  | -1.726042243 | 0.220663197  | 0.453330015  | 0.233266819  | 0.554920641      | 0.177638227      | 0.553607183     |
| 17 beta-sitosterol                    | 39   | 74     | 33       | -2.44424 | -2.58426056   | -1.939475214 | -0.140023089 | 0.504762257  | 0.644785347  | 0.785113067      | 0.113533508      | 0.012376256     |
| 18 capric acid                        | 39   | 74     | 33       | -2.14626 | -2.024212206  | -1.287509461 | 0.122048343  | 0.858751089  | 0.736702745  | 0.871368622      | 0.010509258      | 0.01367807      |
| 19 carbonate ion                      | 39   | 74     | 33       | 3.871691 | 3.787083072   | 3.690215955  | -0.084608048 | -0.181475165 | -0.096867117 | 0.505836486      | 0.115294643      | 0.450540763     |
| 20 cholest-7-en-3-ol*                 | 39   | 74     | 33       | -1.99293 | -1.971140897  | -1.818431591 | 0.021785553  | 0.174494859  | 0.152709306  | 0.993898161      | 0.760316807      | 0.764927791     |
| 21 cholestan-3-ol*                    | 39   | 74     | 33       | -1.90192 | -1.826180612  | -0.955989235 | 0.075738499  | 0.945929876  | 0.870191377  | 0.948517721      | 0.004271694      | 0.002820436     |
| 22 cholesterol                        | 39   | 74     | 33       | 6.376818 | 6.368245588   | 6.408369167  | -0.008572351 | 0.031551229  | 0.040123579  | 0.989830477      | 0.907720495      | 0.818998424     |
| 23 citric acid                        | 39   | 74     | 33       | 2.332407 | 2.34428339    | 2.093860763  | 0.01187674   | -0.238545886 | -0.250422626 | 0.994800887      | 0.23478325       | 0.131785127     |
| 24 creatinine                         | 39   | 74     | 33       | 0.065332 | -0.085225044  | 0.131593897  | -0.150557543 | 0.066261398  | 0.216818941  | 0.621071115      | 0.937199709      | 0.415237897     |
| 25 dehydroalanine                     | 39   | 74     | 33       | -2.27595 | -2.005150548  | -1.64357635  | 0.270798909  | 0.632373107  | 0.361574198  | 0.154143071      | 0.001124478      | 0.052569536     |
| 26 D-fructose                         | 39   | 74     | 33       | 2.364601 | 2.314893584   | 2.433092914  | -0.049707507 | 0.068491823  | 0.11819933   | 0.946752416      | 0.987884437      | 0.758954403     |
| 27 D-gluconic acid                    | 39   | 74     | 33       | -2.94591 | -2.784881561  | -2.013864814 | 0.161031343  | 0.93204809   | 0.771016746  | 0.682544335      | 0.000256498      | 0.000681116     |
| 28 D-glucose                          | 39   | 74     | 33       | 7.982834 | 8.035088871   | 7.885109589  | 0.052252508  | -0.097724074 | -0.149979282 | 0.766441079      | 0.522871662      | 0.146069013     |
| 29 D-gluconuronic acid                | 39   | 74     | 33       | -2.31403 | -2.22406887   | -1.282496169 | 0.091623856  | 1.031534573  | 0.939910718  | 0.904665079      | 0.00027803       | 0.000176501     |
| 30 D-mannose                          | 39   | 74     | 33       | 3.170393 | 3.289055416   | 3.65188024   | 0.118662801  | 0.481487625  | 0.362824824  | 0.644781408      | 0.009792228      | 0.028776106     |
| 31 D-ribitol                          | 39   | 74     | 33       | -3.2467  | -3.090229308  | -2.899399801 | 0.156465887  | 0.347295394  | 0.190829507  | 0.362822049      | 0.030677777      | 0.261089302     |
| 32 D-sorbitol                         | 39   | 74     | 33       | 0.427151 | 0.401638501   | 1.326221849  | -0.025512863 | 0.899070486  | 0.924583349  | 0.992762203      | 0.002637665      | 0.000382294     |
| 33 D-xylitol                          | 39   | 74     | 33       | -1.51925 | -1.417680569  | -1.627852353 | 0.101568206  | -0.108603578 | -0.210171784 | 0.833218283      | 0.864103563      | 0.499427579     |
| 34 dopamine                           | 39   | 74     | 33       | -1.45695 | -1.468079798  | -1.684221496 | -0.011125806 | -0.227267504 | -0.216141698 | 0.994127744      | 0.184668805      | 0.14292145      |
| 35 EDTA [major]                       | 39   | 74     | 33       | 8.606051 | 8.530070058   | 8.278870439  | -0.075981044 | -0.327180664 | -0.251199619 | 0.769372578      | 0.037061021      | 0.082040816     |
| 36 EDTA [minor]                       | 39   | 74     | 33       | 2.670986 | 2.704961756   | 2.666024342  | 0.033976177  | -0.004961237 | -0.038937413 | 0.944168539      | 0.999142499      | 0.934804016     |
| 37 erythritol                         | 39   | 74     | 33       | 0.100895 | -0.04185635   | 0.188420365  | -0.142751661 | 0.087525054  | 0.230276715  | 0.841537381      | 0.955626207      | 0.67019497      |
| 38 erythronic acid                    | 39   | 74     | 33       | -0.28    | -0.394577605  | 0.28529106   | -0.114579522 | 0.508527188  | 0.623106711  | 0.681796624      | 0.006529867      | 9.52E-05        |
| 39 fumaric acid                       | 39   | 74     | 33       | 0.11458  | 0.052985812   | 0.433868765  | -0.061594024 | 0.319288929  | 0.380882953  | 0.900354536      | 0.144307213      | 0.031372377     |
| 40 glyceric acid                      | 39   | 74     | 33       | -0.15249 | -1.269282945  | -1.3023105   | -1.116790668 | -1.149818223 | -0.033027555 | 7.23E-12         | 2.15E-09         | 0.974967897     |
| 41 glycerol                           | 39   | 74     | 33       | 5.019067 | 4.96825257    | 4.965532895  | -0.050814363 | -0.062534039 | -0.011719676 | 0.896692304      | 0.890856301      | 0.994824385     |
| 42 glycerol 3-phosphate               | 39   | 74     | 33       | 0.49184  | 0.554680649   | 0.416532567  | 0.062840279  | -0.075307803 | -0.138148082 | 0.575491326      | 0.573865036      | 0.096199881     |
| 43 glycine                            | 39   | 74     | 33       | 4.897205 | 4.953353077   | 4.715128227  | 0.056148079  | -0.182076772 | -0.238224851 | 0.834632213      | 0.268667265      | 0.05917539      |
| 44 glycolic acid                      | 39   | 74     | 33       | -0.95133 | -0.992351747  | -1.067793768 | -0.041022605 | -0.116464627 | -0.075442021 | 0.702293075      | 0.140897359      | 0.346446459     |
| 45 heptadecanoic acid                 | 39   | 74     | 33       | 0.8576   | 0.818744337   | 0.598534064  | -0.03885698  | -0.086266353 | -0.219209373 | 0.917211445      | 0.047462376      | 0.090911918     |
| 46 hypoxanthine                       | 39   | 74     | 33       | 0.167798 | 1.337003646   | 1.450483345  | 1.169205636  | 1.282685335  | 0.1134797    | 7.12E-05         | 0.000288464      | 0.915392784     |
| 47 inosine                            | 39   | 74     | 33       | -4.57783 | -3.459710848  | -3.836039772 | 1.118120577  | 0.741791652  | -0.376328924 | 0.007655366      | 0.211588054      | 0.596861828     |
| 48 inositol phosphate                 | 39   | 74     | 33       | -2.02445 | -2.047155682  | -2.540455572 | -0.02270192  | -0.561000605 | -0.49329873  | 0.981037796      | 0.001538748      | 0.000561681     |
| 52 internal standard - creatinine-d3  | 39   | 74     | 33       | 0.127152 | -0.397612959  | -0.380825668 | -0.524765166 | -0.507977876 | 0.016787291  | 0.061550425      | 0.157792718      | 0.997377342     |
| 58 internal standard - tryptophan -d3 | 39   | 74     | 33       | 10.31714 | 10.23395924   | 10.03918339  | -0.083177384 | -0.277953238 | -0.194775855 | 0.277944154      | 9.67E-05         | 0.002530497     |
| 59 internal standard - tyrosine 13C6  | 39   | 74     | 33       | 1.644392 | 1.544808034   | 1.593218101  | -0.099584258 | -0.051174191 | 0.048410067  | 0.297608929      | 0.797412004      | 0.772154555     |
| 60 lactic acid                        | 39   | 74     | 33       | 6.856348 | 7.227829257   | 7.434542889  | 0.371481431  | 0.578195064  | 0.206713632  | 0.000510894      | 4.55E-06         | 0.1093796       |
| 61 L-alanine                          | 39   | 74     | 33       | 4.861541 | 4.889609976   | 4.677545629  | 0.037068676  | -0.183995456 | -0.221064131 | 0.9755244        | 0.476014184      | 0.256887118     |
| 62 L-aspartic acid                    | 39   | 74     | 33       | 2.541342 | 2.293359106   | 2.279315588  | -0.247983098 | -0.262026617 | -0.014043518 | 0.064038606      | 0.115242533      | 0.991923814     |
| 63 lactic acid                        | 39   | 74     | 33       | -0.35774 | -0.559024109  | -0.914942366 | -0.201284246 | -0.557202502 | -0.355918257 | 0.42901726       | 0.097528552      | 0.097528552     |
| 64 L-cysteine                         | 39   | 74     | 33       | 1.687302 | 1.969798743   | 2.088693118  | 0.282496498  | 0.401390873  | 0.118894375  | 0.003649661      | 0.000423418      | 0.393637326     |
| 65 L-cystine                          | 39   | 74     | 33       | -4.4104  | 0.19597892    | 1.655743949  | 4.570332793  | 0.06614885   | 1.495816057  | 0                | 0                | 5.20E-07        |
| 66 L-glutamic acid                    | 39   | 74     | 33       | 2.098891 | 1.631444472   | 2.119978613  | -0.467446555 | 0.021087586  | 0.488534141  | 0.007784742      | 0.992751129      | 0.00869898      |
| 67 L-glutamine                        | 39   | 74     | 33       | 0.749781 | 1.310597489   | 1.39459025   | 0.560816979  | 0.64516974   | 0.084352761  | 0.177360852      | 0.21058071       | 0.965020092     |
| 68 linoleic acid                      | 39   | 74     | 33       | 0.888911 | 0.713000799   | 0.788522456  | -0.175909777 | -0.10388119  | 0.075521658  | 0.639497229      | 0.902771942      | 0.928733451     |
| 69 L-isoleucine                       | 39   | 74     | 33       | 3.56852  | 3.565730027   | 3.520874776  | -0.002789801 | -0.047645053 | -0.044855251 | 0.999707815      | 0.942126865      | 0.93476804      |
| 70 L-leucine                          | 39   | 74     | 33       | 4.165779 | 4.143353326   | 3.812494364  | -0.022425493 | -0.353284455 | -0.330858963 | 0.991871843      | 0.247438094      | 0.209879982     |
| 71 L-lysine                           | 39   | 74     | 33       | 3.782923 | 3.826268014   | 4.00763541   | 0.047975184  | 0.29234258   | 0.181367396  | 0.894823592      | 0.174375533      | 0.246666135     |
| 72 L-malic acid                       | 39   | 74     | 33       | -1.5561  | -1.369814995  | -0.995851565 | 0.186284725  | 0.560284815  | 0.37396343   | 0.299113523      | 0.01405825       | 0.01405825      |
| 73 L-methionine                       | 39   | 74     | 33       | 0.798596 | 0.740628887   | 0.725925127  | -0.057967251 | -0.072671011 | -0.01470376  | 0.906570916      | 0.897734172      | 0.994370709     |
| 74 L-ornithine                        | 39   | 74     | 33       | 3.78267  | 3.69627731    | 3.917014117  | -0.081990082 | 0.138746725  | 0.220736807  | 0.697685763      | 0.487340168      | 0.101816506     |
| 75 L-phenylalanine                    | 39   | 74     | 33       | 2.027119 | 2.047518848   | 1.92572636   | 0.02400227   | -0.10365984  | -0.121766211 | 0.994617356      | 0.842384723      | 0.9347804       |
| 76 L-proline                          | 39   | 74     | 33       | 4.207605 | 4.069263648   | 4.09310557   | -0.138340898 | -0.114489876 | 0.023841922  | 0.66939975       | 0.824590945      | 0.989358734     |
| 77 L-pyroglutamic acid                | 39   | 74     | 33       | 4.330487 | 4.349493422   | 4.41396617   | 0.019006298  | 0.083479046  | 0.0644       |                  |                  |                 |



|     |             |    |    |    |          |              |              |              |              |              |             |             |             |
|-----|-------------|----|----|----|----------|--------------|--------------|--------------|--------------|--------------|-------------|-------------|-------------|
| 106 | Unknown 003 | 39 | 74 | 33 | -1.77166 | -1.884480017 | -2.219016821 | -0.112817767 | -0.447354571 | -0.334536804 | 0.258866383 | 1.75E-06    | 5.72E-05    |
| 107 | Unknown 004 | 39 | 74 | 33 | -0.88967 | -0.947458161 | -0.925476297 | -0.057786523 | -0.035804659 | 0.021981865  | 0.909018522 | 0.974676286 | 0.987730245 |
| 108 | Unknown 005 | 39 | 74 | 33 | 1.323075 | 1.56873333   | 1.59330191   | 0.245658483  | 0.270227063  | 0.02456858   | 0.599745359 | 0.648344974 | 0.995415829 |
| 109 | Unknown 006 | 39 | 74 | 33 | -2.12565 | -2.025838115 | -2.062469315 | 0.099815353  | 0.063184153  | -0.0366312   | 0.542147573 | 0.841548022 | 0.928568149 |
| 110 | Unknown 007 | 39 | 74 | 33 | 0.143794 | -0.23863886  | -0.025425348 | -0.382457675 | -0.169219156 | 0.213238519  | 0.268021684 | 0.833088716 | 0.691084892 |
| 111 | Unknown 008 | 39 | 74 | 33 | -0.51502 | -0.537098751 | -0.954542847 | -0.022077463 | -0.43952156  | -0.417444097 | 0.981851281 | 0.003982978 | 0.003982978 |
| 112 | Unknown 009 | 39 | 74 | 33 | -0.96472 | -1.0678959   | -1.594254595 | -0.053957436 | -0.629533073 | -0.575575636 | 0.931902194 | 0.001834094 | 0.001231867 |
| 113 | Unknown 010 | 39 | 73 | 33 | -0.90913 | -0.903513611 | -0.838531303 | 0.005618907  | 0.070601214  | 0.064982307  | 0.999481254 | 0.004056066 | 0.930878564 |
| 114 | Unknown 011 | 39 | 74 | 33 | 1.645347 | 1.48689251   | 1.322538874  | -0.158454028 | -0.322807664 | -0.164353636 | 0.557082238 | 0.18643854  | 0.569734106 |
| 115 | Unknown 012 | 39 | 74 | 33 | 1.484225 | 1.274154182  | 1.2218215    | -0.210070678 | -0.26240336  | -0.052332682 | 0.332545485 | 0.300886441 | 0.9401225   |
| 116 | Unknown 013 | 39 | 74 | 33 | 0.136522 | 0.227572977  | 0.642180643  | 0.091051421  | 0.505659087  | 0.414607667  | 0.829958155 | 0.020852078 | 0.035429288 |
| 117 | Unknown 014 | 39 | 74 | 33 | 1.707932 | 1.889165011  | 1.590197041  | 0.181233244  | -0.117734726 | -0.29896797  | 0.643985982 | 0.877725691 | 0.345412448 |
| 118 | Unknown 015 | 39 | 74 | 33 | 2.561528 | 2.65037149   | 2.034134673  | 0.088843437  | -0.527393379 | -0.616236817 | 0.923523325 | 0.14604756  | 0.03667455  |
| 119 | Unknown 016 | 39 | 74 | 33 | -3.15119 | -2.943529694 | -3.126726518 | 0.207663869  | 0.024467045  | -0.183196824 | 0.413598901 | 0.991378503 | 0.540241961 |
| 120 | Unknown 017 | 39 | 74 | 33 | -1.38626 | -1.357706955 | -1.789058233 | 0.028549076  | -0.402802202 | -0.431351278 | 0.959862641 | 0.004523914 | 0.000440689 |
| 121 | Unknown 018 | 39 | 74 | 33 | -0.40465 | -0.561085497 | -0.134719815 | -0.156432874 | 0.269932808  | 0.426365682  | 0.422333891 | 0.168837847 | 0.004266051 |
| 122 | Unknown 019 | 39 | 74 | 33 | -4.10777 | -3.517471502 | -3.521761028 | 0.590300908  | 0.586011381  | -0.004289527 | 1.14E-06    | 5.68E-05    | 0.999262654 |
| 123 | Unknown 020 | 39 | 74 | 33 | -3.24372 | -3.082603378 | -2.811841744 | 0.161116948  | 0.431878582  | 0.270761634  | 0.765993507 | 0.265685507 | 0.511787272 |
| 124 | Unknown 021 | 39 | 74 | 33 | -1.42938 | -1.526442269 | -2.049434253 | -0.097059027 | -0.62005101  | -0.522991983 | 0.735054897 | 0.002096723 | 0.00059471  |
| 125 | Unknown 022 | 39 | 74 | 33 | -3.0661  | -3.203002409 | -3.403466018 | -0.136906058 | -0.364396667 | -0.227463609 | 0.49285301  | 0.033059849 | 0.117915936 |
| 126 | Unknown 023 | 39 | 73 | 33 | -2.96581 | -2.988169204 | -3.29331461  | -0.022357524 | -0.327519781 | -0.305162257 | 0.978734386 | 0.043376096 | 0.031676768 |
| 127 | Unknown 024 | 39 | 74 | 32 | -0.34443 | -0.248643154 | -0.42431828  | 0.095783411  | -0.079891716 | -0.175675126 | 0.91910639  | 0.960397083 | 0.780549162 |
| 128 | Unknown 025 | 39 | 74 | 33 | -1.87751 | -1.720503607 | -1.983623363 | 0.157006757  | -0.160112998 | -0.263119755 | 0.193402153 | 0.5877101   | 0.01790258  |
| 129 | Unknown 026 | 39 | 74 | 33 | 0.425196 | 0.476457069  | 0.427128788  | 0.051260936  | 0.001932655  | -0.049328281 | 0.839758937 | 0.999825942 | 0.865402627 |
| 130 | Unknown 027 | 39 | 74 | 33 | -1.02035 | -1.056280425 | -1.095584969 | -0.035931138 | -0.057235683 | -0.039304544 | 0.87725301  | 0.669861089 | 0.869342837 |
| 131 | Unknown 028 | 39 | 74 | 33 | 0.073129 | 0.265293724  | -0.365731861 | 0.193165017  | 0.438860568  | -0.632025585 | 0.521017604 | 0.098851198 | 0.002715798 |
| 132 | Unknown 029 | 12 | 23 | 12 | -4.7284  | -4.915376484 | -3.996834245 | -0.186976407 | -0.73156831  | 0.918542238  | 0.973358344 | 0.731877283 | 0.526713209 |
| 133 | Unknown 030 | 39 | 74 | 33 | -1.50808 | -1.418581572 | -1.66932242  | 0.089495222  | -0.161245626 | -0.250740848 | 0.612183714 | 0.330367078 | 0.035424934 |
| 134 | Unknown 031 | 39 | 74 | 33 | -1.64108 | -1.630846031 | -1.106482047 | 0.010231157  | 0.534595141  | 0.524363984  | 0.997329077 | 0.007766687 | 0.002724    |
| 135 | Unknown 032 | 4  | 8  | 10 | 0.648028 | 0.419621978  | 0.799098784  | -0.228406229 | 0.151880576  | 0.380286806  | 0.965521974 | 0.98349785  | 0.851336019 |
| 136 | Unknown 033 | 39 | 74 | 33 | 0.090941 | -0.625701617 | -0.336216366 | -0.716642891 | -0.42715764  | 0.289485251  | 2.16E-06    | 0.02871913  | 0.120864867 |
| 137 | Unknown 034 | 39 | 74 | 33 | -3.73172 | -3.446270094 | -3.651881591 | 0.285445027  | 0.07983353   | -0.205611497 | 0.21694533  | 0.146254746 | 0.489340474 |
| 138 | Unknown 035 | 39 | 74 | 33 | -1.28787 | -1.837411179 | -1.932508354 | -0.549544841 | -0.644642016 | -0.095097175 | 0.000205736 | 0.000275212 | 0.781223938 |
| 139 | Unknown 036 | 39 | 74 | 33 | -0.96805 | -1.181906433 | -1.143067263 | -0.213855182 | -0.175016013 | 0.03883917   | 0.088345895 | 0.315742129 | 0.929288814 |
| 140 | Unknown 037 | 39 | 74 | 33 | -3.91437 | -3.603873366 | -3.504900194 | 0.310584462  | 0.409471634  | 0.098887172  | 0.024011066 | 0.011094624 | 0.704661332 |
| 141 | Unknown 038 | 39 | 74 | 33 | -1.79303 | -1.626575732 | -1.297895018 | 0.166452871  | 0.495133224  | 0.328680354  | 0.734527142 | 0.152762548 | 0.344293619 |
| 142 | Unknown 039 | 39 | 73 | 33 | -3.51713 | -4.40957706  | -4.204023185 | -0.892447091 | -0.686893216 | 0.205553875  | 0.144630516 | 0.44257029  | 0.910701302 |
| 143 | Unknown 040 | 39 | 74 | 33 | 2.990792 | 2.966598887  | 2.522003652  | -0.084232573 | -0.468788808 | -0.384556235 | 0.600010602 | 4.24E-05    | 0.0015746   |
| 144 | Unknown 041 | 39 | 74 | 33 | 3.848689 | 3.841320365  | 3.79823029   | -0.007368763 | -0.1188661   | -0.111497336 | 0.99677782  | 0.557617635 | 0.51910796  |
| 145 | Unknown 042 | 39 | 74 | 33 | 7.598106 | 7.593278517  | 7.504044217  | -0.00482748  | -0.094061781 | -0.0892343   | 0.99658204  | 0.406172729 | 0.355642543 |
| 146 | Unknown 043 | 39 | 74 | 33 | 4.17127  | 4.081114192  | 3.850854731  | -0.090155389 | -0.320414851 | -0.230259461 | 0.510942344 | 0.00355367  | 0.022631998 |
| 147 | Unknown 044 | 39 | 74 | 33 | 1.630782 | 1.475907002  | 1.637211408  | -0.154874859 | 0.606429547  | 0.161304407  | 0.806433742 | 0.999739929 | 0.811759067 |
| 148 | Unknown 045 | 39 | 74 | 33 | -0.00816 | -0.031086683 | -0.585295705 | -0.022924659 | -0.577133681 | -0.554209022 | 0.983039887 | 0.00059292  | 0.000269272 |
| 149 | Unknown 046 | 39 | 74 | 33 | 3.774661 | 3.704232701  | 3.57756929   | -0.070428306 | -0.197091717 | -0.126663411 | 0.717221932 | 0.166372654 | 0.385097948 |
| 150 | Unknown 047 | 39 | 74 | 33 | -2.10572 | -1.728737763 | -1.260526133 | 0.376978296  | 0.845189926  | 0.46821163   | 0.753434283 | 0.372143617 | 0.767184418 |
| 151 | Unknown 048 | 39 | 74 | 33 | -1.3509  | -1.394541577 | -1.102394819 | -0.043644997 | -0.248501762 | 0.92146758   | 0.963030992 | 0.428511572 | 0.226511251 |
| 152 | Unknown 049 | 39 | 74 | 33 | -0.18613 | 0.156855614  | 0.132637338  | 0.342983505  | 0.318765229  | -0.024218276 | 0.615124675 | 0.744999023 | 0.997825986 |
| 153 | Unknown 050 | 39 | 74 | 33 | 2.79875  | 2.76177089   | 2.736962375  | -0.036978984 | -0.061787499 | -0.024808516 | 0.95797332  | 0.919562389 | 0.982875164 |
| 154 | Unknown 051 | 39 | 74 | 33 | 3.171386 | 3.032831389  | 2.935917142  | -0.13855421  | -0.235468458 | -0.096914247 | 0.619957997 | 0.382344709 | 0.810880345 |
| 155 | Unknown 052 | 39 | 74 | 33 | 0.392426 | 0.028125463  | -0.083727622 | -0.364300801 | -0.476153886 | -0.111853085 | 0.130880534 | 0.088793257 | 0.839678735 |
| 156 | Unknown 053 | 39 | 74 | 33 | 1.344447 | 1.475568631  | 1.28524087   | 0.131121975  | -0.059205786 | -0.190327761 | 0.622030298 | 0.934218026 | 0.410700017 |
| 157 | Unknown 054 | 39 | 74 | 33 | 2.490648 | 2.504647417  | 2.647005078  | 0.013999408  | 0.156357069  | 0.142357661  | 0.994076659 | 0.579008957 | 0.579400284 |
| 158 | Unknown 055 | 39 | 74 | 33 | 1.42603  | 1.486535709  | 0.97805283   | 0.060505366  | 0.049777513  | -0.508482879 | 0.86037962  | 0.500425164 | 0.00165772  |
| 159 | Unknown 056 | 39 | 74 | 33 | -3.21598 | -3.04872778  | -3.126605462 | 0.167249293  | 0.088971612  | -0.077877682 | 0.339949158 | 0.804418057 | 0.809765211 |
| 160 | Unknown 057 | 39 | 74 | 33 | -3.34147 | -3.138676588 | -3.173066741 | 0.202788932  | 0.168398778  | -0.034390154 | 1.85051448  | 0.439637231 | 0.956830507 |
| 161 | Unknown 058 | 39 | 74 | 33 | -0.69092 | -0.290669697 | -0.505171684 | 0.400253641  | 0.185751654  | -0.214501987 | 0.14432838  | 0.743095371 | 0.683854279 |
| 162 | Unknown 059 | 39 | 74 | 33 | -0.10186 | 0.223860219  | 0.338849059  | 0.325724439  | 0.535748278  | 0.210023839  | 0.084657807 | 0.010302821 | 0.39362277  |
| 163 | Unknown 060 | 39 | 74 | 33 | 0.478817 | 0.50638845   | 0.413291332  | 0.027571292  | -0.165525827 | -0.193097119 | 0.915971507 | 0.02751507  | 0.114694547 |
| 164 | Unknown 061 | 39 | 74 | 33 | -1.24489 | -1.167345735 | -1.946946297 | 0.077545418  | -0.702055144 | -0.779600562 | 0.894592548 | 0.00244922  | 0.000102827 |
| 165 | Unknown 062 | 39 | 74 | 33 | -0.08492 | -0.099892493 | -0.491353954 | -0.014970445 | -0.406431906 | -0.391461461 | 0.987992616 | 0.002836333 | 0.001029415 |
| 166 | Unknown 063 | 39 | 74 | 33 | 0.000616 | -0.099884169 | -0.485928118 | -0.100600181 | -0.486544129 | -0.385943948 | 0.537940716 | 9.10E-05    | 0.00050199  |
| 167 | Unknown 064 | 39 | 74 | 33 | -0.15406 | -0.139241139 | -0.491370583 | 0.014818711  | -0.33710732  | -0.352129444 | 0.987622291 | 0.013337701 | 0.002705988 |
| 168 | Unknown 065 | 39 | 74 | 33 | -1.15987 | -1.225547126 | -1.45891011  | -0.065681113 | -0.299044097 | -0.233362984 | 0.944756988 | 0.441435545 | 0.528861157 |
| 169 | Unknown 066 | 39 | 74 | 33 | 0.108702 | 0.031816078  | 0.062944427  | -0.076886238 | 0.094577889  | 0.031128349  | 0.781243886 | 0.940522232 | 0.964406525 |
| 170 | Unknown 067 | 39 | 74 | 33 | 0.518708 | 0.643390886  | 0.816140436  | 0.124682482  | 0.247432032  | 0.17274955   | 0.711181778 | 0.261077084 | 0.558149051 |
| 171 | Unknown 068 | 39 | 74 | 33 | -1.12346 | -1.123810739 | -1.844464924 | -0.000354632 | -0.721008817 | -0.720654185 | 0.999997903 | 0.003289472 | 0.000755285 |
| 172 | Unknown 069 | 39 | 74 | 33 | -1.42071 | -1.104633301 | -1.474647564 | 0.316072478  | -0.053941784 | -0.370014262 | 0.350363665 | 0.978614625 | 0.277704842 |
| 173 | Unknown 070 | 39 | 74 | 33 | -1.81281 | -1.984478327 | -2.030271087 | -0.1716645   |              |              |             |             |             |

|                 |    |    |    |          |              |              |              |              |              |             |             |             |
|-----------------|----|----|----|----------|--------------|--------------|--------------|--------------|--------------|-------------|-------------|-------------|
| 204 Unknown 101 | 39 | 74 | 33 | -2.22748 | -2.261232904 | -2.358659818 | -0.033749888 | -0.131176802 | -0.097426914 | 0.993087642 | 0.929335817 | 0.949682941 |
| 205 Unknown 102 | 39 | 73 | 33 | -3.51935 | -1.981837844 | -1.641701816 | 1.537507857  | 1.877643885  | 0.340136028  | 1.69E-05    | 1.04E-05    | 0.586642877 |
| 206 Unknown 103 | 39 | 74 | 33 | 0.011495 | 0.172496474  | 0.154895125  | 0.161001151  | 0.143399801  | -0.01760135  | 0.591706571 | 0.74670605  | 0.994379888 |
| 207 Unknown 104 | 39 | 70 | 32 | -1.64607 | -4.286801006 | -5.077334368 | -2.640731845 | -3.431265207 | -0.790533362 | 8.66E-08    | 6.60E-09    | 0.228642052 |
| 208 Unknown 105 | 39 | 74 | 33 | 0.44489  | 0.336857909  | 0.281883988  | -0.108032012 | -0.163005933 | -0.054973921 | 0.811256064 | 0.716876499 | 0.952671057 |
| 209 Unknown 106 | 39 | 74 | 33 | -0.65443 | -0.650681906 | -0.677986907 | 0.003748679  | -0.023556323 | -0.027305002 | 0.999834414 | 0.995434048 | 0.992180286 |
| 210 Unknown 107 | 39 | 74 | 33 | 4.079474 | 4.187140091  | 4.252216362  | 0.10766614   | 0.172742411  | 0.065076271  | 0.833517076 | 0.720677336 | 0.942209108 |
| 211 Unknown 108 | 39 | 74 | 33 | -1.60148 | -1.531654425 | -1.474809211 | 0.06982402   | 0.126669234  | 0.056845214  | 0.950927434 | 0.890638518 | 0.970631518 |
| 212 Unknown 109 | 39 | 74 | 33 | -2.04133 | -1.727937458 | -1.950211685 | 0.31339412   | 0.091119892  | -0.222274227 | 0.510154406 | 0.960698314 | 0.738046604 |
| 213 Unknown 110 | 38 | 74 | 33 | -1.07312 | -0.557021525 | -0.37689771  | 0.516100639  | 0.696224454  | 0.180123815  | 0.264552258 | 0.183479702 | 0.861466226 |

## Supplemental Table IV:

| Protein | uniprot_url                                                                                 | Cor_w_NET   |
|---------|---------------------------------------------------------------------------------------------|-------------|
| P62258  | <a href="https://www.uniprot.org/uniprot/P62258">https://www.uniprot.org/uniprot/P62258</a> | 0.691252814 |
| P02671  | <a href="https://www.uniprot.org/uniprot/P02671">https://www.uniprot.org/uniprot/P02671</a> | 0.608444092 |
| P15291  | <a href="https://www.uniprot.org/uniprot/P15291">https://www.uniprot.org/uniprot/P15291</a> | 0.791351511 |
| P11047  | <a href="https://www.uniprot.org/uniprot/P11047">https://www.uniprot.org/uniprot/P11047</a> | 0.762476326 |
| P0DOY3  | <a href="https://www.uniprot.org/uniprot/P0DOY3">https://www.uniprot.org/uniprot/P0DOY3</a> | 0.684550547 |
| P06744  | <a href="https://www.uniprot.org/uniprot/P06744">https://www.uniprot.org/uniprot/P06744</a> | 0.808941074 |
| P24821  | <a href="https://www.uniprot.org/uniprot/P24821">https://www.uniprot.org/uniprot/P24821</a> | 0.682467661 |
| P01033  | <a href="https://www.uniprot.org/uniprot/P01033">https://www.uniprot.org/uniprot/P01033</a> | 0.827003164 |
| P14625  | <a href="https://www.uniprot.org/uniprot/P14625">https://www.uniprot.org/uniprot/P14625</a> | 0.739693826 |
| Q12907  | <a href="https://www.uniprot.org/uniprot/Q12907">https://www.uniprot.org/uniprot/Q12907</a> | 0.686606335 |
| P0DJ18  | <a href="https://www.uniprot.org/uniprot/P0DJ18">https://www.uniprot.org/uniprot/P0DJ18</a> | 0.743892057 |
| P69905  | <a href="https://www.uniprot.org/uniprot/P69905">https://www.uniprot.org/uniprot/P69905</a> | 0.619340603 |
| P13667  | <a href="https://www.uniprot.org/uniprot/P13667">https://www.uniprot.org/uniprot/P13667</a> | 0.761316849 |
| P01011  | <a href="https://www.uniprot.org/uniprot/P01011">https://www.uniprot.org/uniprot/P01011</a> | 0.678784994 |
| P02741  | <a href="https://www.uniprot.org/uniprot/P02741">https://www.uniprot.org/uniprot/P02741</a> | 0.74196483  |
| P02788  | <a href="https://www.uniprot.org/uniprot/P02788">https://www.uniprot.org/uniprot/P02788</a> | 0.740338601 |
| P55854  | <a href="https://www.uniprot.org/uniprot/P55854">https://www.uniprot.org/uniprot/P55854</a> | 0.661225392 |
| P20160  | <a href="https://www.uniprot.org/uniprot/P20160">https://www.uniprot.org/uniprot/P20160</a> | 0.769067958 |
| P02042  | <a href="https://www.uniprot.org/uniprot/P02042">https://www.uniprot.org/uniprot/P02042</a> | 0.612421726 |
| Q02809  | <a href="https://www.uniprot.org/uniprot/Q02809">https://www.uniprot.org/uniprot/Q02809</a> | 0.635092928 |
| P18428  | <a href="https://www.uniprot.org/uniprot/P18428">https://www.uniprot.org/uniprot/P18428</a> | 0.769097603 |
| Q9UHI8  | <a href="https://www.uniprot.org/uniprot/Q9UHI8">https://www.uniprot.org/uniprot/Q9UHI8</a> | 0.655870394 |
| P20333  | <a href="https://www.uniprot.org/uniprot/P20333">https://www.uniprot.org/uniprot/P20333</a> | 0.641866    |
| Q15485  | <a href="https://www.uniprot.org/uniprot/Q15485">https://www.uniprot.org/uniprot/Q15485</a> | 0.606446189 |
| P10451  | <a href="https://www.uniprot.org/uniprot/P10451">https://www.uniprot.org/uniprot/P10451</a> | 0.667184233 |
| P05164  | <a href="https://www.uniprot.org/uniprot/P05164">https://www.uniprot.org/uniprot/P05164</a> | 0.82327699  |
| P13796  | <a href="https://www.uniprot.org/uniprot/P13796">https://www.uniprot.org/uniprot/P13796</a> | 0.666850137 |
| P04275  | <a href="https://www.uniprot.org/uniprot/P04275">https://www.uniprot.org/uniprot/P04275</a> | 0.628584018 |
| P25786  | <a href="https://www.uniprot.org/uniprot/P25786">https://www.uniprot.org/uniprot/P25786</a> | 0.797779734 |
| Q9BYE9  | <a href="https://www.uniprot.org/uniprot/Q9BYE9">https://www.uniprot.org/uniprot/Q9BYE9</a> | 0.605212344 |
| P02750  | <a href="https://www.uniprot.org/uniprot/P02750">https://www.uniprot.org/uniprot/P02750</a> | 0.667660953 |
| Q06033  | <a href="https://www.uniprot.org/uniprot/Q06033">https://www.uniprot.org/uniprot/Q06033</a> | 0.635130951 |
| P01034  | <a href="https://www.uniprot.org/uniprot/P01034">https://www.uniprot.org/uniprot/P01034</a> | 0.652683816 |
| P23381  | <a href="https://www.uniprot.org/uniprot/P23381">https://www.uniprot.org/uniprot/P23381</a> | 0.701027123 |
| P60900  | <a href="https://www.uniprot.org/uniprot/P60900">https://www.uniprot.org/uniprot/P60900</a> | 0.805532798 |
| P07998  | <a href="https://www.uniprot.org/uniprot/P07998">https://www.uniprot.org/uniprot/P07998</a> | 0.601512371 |
| P33908  | <a href="https://www.uniprot.org/uniprot/P33908">https://www.uniprot.org/uniprot/P33908</a> | 0.604425892 |
| Q8TDQ0  | <a href="https://www.uniprot.org/uniprot/Q8TDQ0">https://www.uniprot.org/uniprot/Q8TDQ0</a> | 0.722261494 |
| P00338  | <a href="https://www.uniprot.org/uniprot/P00338">https://www.uniprot.org/uniprot/P00338</a> | 0.732384091 |
| P01762  | <a href="https://www.uniprot.org/uniprot/P01762">https://www.uniprot.org/uniprot/P01762</a> | 0.703321131 |
| P05362  | <a href="https://www.uniprot.org/uniprot/P05362">https://www.uniprot.org/uniprot/P05362</a> | 0.713910191 |
| P14543  | <a href="https://www.uniprot.org/uniprot/P14543">https://www.uniprot.org/uniprot/P14543</a> | 0.791857117 |
| O43278  | <a href="https://www.uniprot.org/uniprot/O43278">https://www.uniprot.org/uniprot/O43278</a> | 0.646364245 |
| Q14118  | <a href="https://www.uniprot.org/uniprot/Q14118">https://www.uniprot.org/uniprot/Q14118</a> | 0.626801502 |
| P25789  | <a href="https://www.uniprot.org/uniprot/P25789">https://www.uniprot.org/uniprot/P25789</a> | 0.802991068 |
| P68871  | <a href="https://www.uniprot.org/uniprot/P68871">https://www.uniprot.org/uniprot/P68871</a> | 0.666536499 |

|        |                                                                                             |             |
|--------|---------------------------------------------------------------------------------------------|-------------|
| P08670 | <a href="https://www.uniprot.org/uniprot/P08670">https://www.uniprot.org/uniprot/P08670</a> | 0.884880768 |
| P07602 | <a href="https://www.uniprot.org/uniprot/P07602">https://www.uniprot.org/uniprot/P07602</a> | 0.796856263 |
| P14314 | <a href="https://www.uniprot.org/uniprot/P14314">https://www.uniprot.org/uniprot/P14314</a> | 0.816199799 |
| P34096 | <a href="https://www.uniprot.org/uniprot/P34096">https://www.uniprot.org/uniprot/P34096</a> | 0.634115535 |
| P04040 | <a href="https://www.uniprot.org/uniprot/P04040">https://www.uniprot.org/uniprot/P04040</a> | 0.760608695 |
| P35442 | <a href="https://www.uniprot.org/uniprot/P35442">https://www.uniprot.org/uniprot/P35442</a> | 0.719742337 |
| P0DJ19 | <a href="https://www.uniprot.org/uniprot/P0DJ19">https://www.uniprot.org/uniprot/P0DJ19</a> | 0.807233734 |
| Q8TCZ2 | <a href="https://www.uniprot.org/uniprot/Q8TCZ2">https://www.uniprot.org/uniprot/Q8TCZ2</a> | 0.653251288 |
| P06312 | <a href="https://www.uniprot.org/uniprot/P06312">https://www.uniprot.org/uniprot/P06312</a> | 0.654293225 |
| P01619 | <a href="https://www.uniprot.org/uniprot/P01619">https://www.uniprot.org/uniprot/P01619</a> | 0.617770057 |
| Q14767 | <a href="https://www.uniprot.org/uniprot/Q14767">https://www.uniprot.org/uniprot/Q14767</a> | 0.699846897 |
| P06702 | <a href="https://www.uniprot.org/uniprot/P06702">https://www.uniprot.org/uniprot/P06702</a> | 0.879841835 |
| P39060 | <a href="https://www.uniprot.org/uniprot/P39060">https://www.uniprot.org/uniprot/P39060</a> | 0.689603103 |
| Q9Y279 | <a href="https://www.uniprot.org/uniprot/Q9Y279">https://www.uniprot.org/uniprot/Q9Y279</a> | 0.794195668 |
| P40306 | <a href="https://www.uniprot.org/uniprot/P40306">https://www.uniprot.org/uniprot/P40306</a> | 0.720995502 |
| Q99436 | <a href="https://www.uniprot.org/uniprot/Q99436">https://www.uniprot.org/uniprot/Q99436</a> | 0.776661454 |
| Q969E1 | <a href="https://www.uniprot.org/uniprot/Q969E1">https://www.uniprot.org/uniprot/Q969E1</a> | 0.677559028 |
| P29401 | <a href="https://www.uniprot.org/uniprot/P29401">https://www.uniprot.org/uniprot/P29401</a> | 0.855001398 |
| P53004 | <a href="https://www.uniprot.org/uniprot/P53004">https://www.uniprot.org/uniprot/P53004</a> | 0.665754034 |
| P24043 | <a href="https://www.uniprot.org/uniprot/P24043">https://www.uniprot.org/uniprot/P24043</a> | 0.629258452 |
| P05109 | <a href="https://www.uniprot.org/uniprot/P05109">https://www.uniprot.org/uniprot/P05109</a> | 0.90658628  |
| P20810 | <a href="https://www.uniprot.org/uniprot/P20810">https://www.uniprot.org/uniprot/P20810</a> | 0.771421498 |
| P14555 | <a href="https://www.uniprot.org/uniprot/P14555">https://www.uniprot.org/uniprot/P14555</a> | 0.809310297 |
| P07954 | <a href="https://www.uniprot.org/uniprot/P07954">https://www.uniprot.org/uniprot/P07954</a> | 0.725504356 |
| P27824 | <a href="https://www.uniprot.org/uniprot/P27824">https://www.uniprot.org/uniprot/P27824</a> | 0.724100564 |
| Q86VP6 | <a href="https://www.uniprot.org/uniprot/Q86VP6">https://www.uniprot.org/uniprot/Q86VP6</a> | 0.709622404 |
| P80723 | <a href="https://www.uniprot.org/uniprot/P80723">https://www.uniprot.org/uniprot/P80723</a> | 0.709838428 |
| P29966 | <a href="https://www.uniprot.org/uniprot/P29966">https://www.uniprot.org/uniprot/P29966</a> | 0.689532859 |
| Q12882 | <a href="https://www.uniprot.org/uniprot/Q12882">https://www.uniprot.org/uniprot/Q12882</a> | 0.659915578 |
| Q5JRA6 | <a href="https://www.uniprot.org/uniprot/Q5JRA6">https://www.uniprot.org/uniprot/Q5JRA6</a> | 0.708539419 |
| P05386 | <a href="https://www.uniprot.org/uniprot/P05386">https://www.uniprot.org/uniprot/P05386</a> | 0.799088732 |
| P80511 | <a href="https://www.uniprot.org/uniprot/P80511">https://www.uniprot.org/uniprot/P80511</a> | 0.800440275 |
| P25787 | <a href="https://www.uniprot.org/uniprot/P25787">https://www.uniprot.org/uniprot/P25787</a> | 0.760424836 |
| Q9Y4L1 | <a href="https://www.uniprot.org/uniprot/Q9Y4L1">https://www.uniprot.org/uniprot/Q9Y4L1</a> | 0.694284962 |
| P37837 | <a href="https://www.uniprot.org/uniprot/P37837">https://www.uniprot.org/uniprot/P37837</a> | 0.896216698 |
| P22234 | <a href="https://www.uniprot.org/uniprot/P22234">https://www.uniprot.org/uniprot/P22234</a> | 0.774540359 |
| P22897 | <a href="https://www.uniprot.org/uniprot/P22897">https://www.uniprot.org/uniprot/P22897</a> | 0.782048936 |
| P00441 | <a href="https://www.uniprot.org/uniprot/P00441">https://www.uniprot.org/uniprot/P00441</a> | 0.690698022 |
| P61970 | <a href="https://www.uniprot.org/uniprot/P61970">https://www.uniprot.org/uniprot/P61970</a> | 0.665618755 |
| P00390 | <a href="https://www.uniprot.org/uniprot/P00390">https://www.uniprot.org/uniprot/P00390</a> | 0.703576077 |
| Q09666 | <a href="https://www.uniprot.org/uniprot/Q09666">https://www.uniprot.org/uniprot/Q09666</a> | 0.685486192 |
| Q99523 | <a href="https://www.uniprot.org/uniprot/Q99523">https://www.uniprot.org/uniprot/Q99523</a> | 0.617867479 |
| P07900 | <a href="https://www.uniprot.org/uniprot/P07900">https://www.uniprot.org/uniprot/P07900</a> | 0.702408536 |
| P30740 | <a href="https://www.uniprot.org/uniprot/P30740">https://www.uniprot.org/uniprot/P30740</a> | 0.733393687 |
| P11234 | <a href="https://www.uniprot.org/uniprot/P11234">https://www.uniprot.org/uniprot/P11234</a> | 0.674426981 |
| P34932 | <a href="https://www.uniprot.org/uniprot/P34932">https://www.uniprot.org/uniprot/P34932</a> | 0.820761479 |
| P13798 | <a href="https://www.uniprot.org/uniprot/P13798">https://www.uniprot.org/uniprot/P13798</a> | 0.644591851 |

|        |                                                                                             |             |
|--------|---------------------------------------------------------------------------------------------|-------------|
| P53396 | <a href="https://www.uniprot.org/uniprot/P53396">https://www.uniprot.org/uniprot/P53396</a> | 0.675525827 |
| P55786 | <a href="https://www.uniprot.org/uniprot/P55786">https://www.uniprot.org/uniprot/P55786</a> | 0.686136776 |
| P05388 | <a href="https://www.uniprot.org/uniprot/P05388">https://www.uniprot.org/uniprot/P05388</a> | 0.785111322 |
| P09603 | <a href="https://www.uniprot.org/uniprot/P09603">https://www.uniprot.org/uniprot/P09603</a> | 0.632987154 |
| Q9UNZ2 | <a href="https://www.uniprot.org/uniprot/Q9UNZ2">https://www.uniprot.org/uniprot/Q9UNZ2</a> | 0.747321332 |
| P48147 | <a href="https://www.uniprot.org/uniprot/P48147">https://www.uniprot.org/uniprot/P48147</a> | 0.714580535 |
| P0DMV8 | <a href="https://www.uniprot.org/uniprot/P0DMV8">https://www.uniprot.org/uniprot/P0DMV8</a> | 0.756017785 |
| P02461 | <a href="https://www.uniprot.org/uniprot/P02461">https://www.uniprot.org/uniprot/P02461</a> | 0.681093691 |
| P20618 | <a href="https://www.uniprot.org/uniprot/P20618">https://www.uniprot.org/uniprot/P20618</a> | 0.798548973 |
| P23526 | <a href="https://www.uniprot.org/uniprot/P23526">https://www.uniprot.org/uniprot/P23526</a> | 0.788609142 |
| P13987 | <a href="https://www.uniprot.org/uniprot/P13987">https://www.uniprot.org/uniprot/P13987</a> | 0.63943807  |
| P49247 | <a href="https://www.uniprot.org/uniprot/P49247">https://www.uniprot.org/uniprot/P49247</a> | 0.776232211 |
| P52209 | <a href="https://www.uniprot.org/uniprot/P52209">https://www.uniprot.org/uniprot/P52209</a> | 0.786552322 |
| B9A064 | <a href="https://www.uniprot.org/uniprot/B9A064">https://www.uniprot.org/uniprot/B9A064</a> | 0.71264617  |
| P08572 | <a href="https://www.uniprot.org/uniprot/P08572">https://www.uniprot.org/uniprot/P08572</a> | 0.623118125 |
| O00461 | <a href="https://www.uniprot.org/uniprot/O00461">https://www.uniprot.org/uniprot/O00461</a> | 0.661835631 |
| P61201 | <a href="https://www.uniprot.org/uniprot/P61201">https://www.uniprot.org/uniprot/P61201</a> | 0.691035947 |
| Q93091 | <a href="https://www.uniprot.org/uniprot/Q93091">https://www.uniprot.org/uniprot/Q93091</a> | 0.638613142 |
| O95861 | <a href="https://www.uniprot.org/uniprot/O95861">https://www.uniprot.org/uniprot/O95861</a> | 0.647008222 |
| P50502 | <a href="https://www.uniprot.org/uniprot/P50502">https://www.uniprot.org/uniprot/P50502</a> | 0.74662288  |
| P16949 | <a href="https://www.uniprot.org/uniprot/P16949">https://www.uniprot.org/uniprot/P16949</a> | 0.801325287 |
| P48637 | <a href="https://www.uniprot.org/uniprot/P48637">https://www.uniprot.org/uniprot/P48637</a> | 0.648133704 |
| O75223 | <a href="https://www.uniprot.org/uniprot/O75223">https://www.uniprot.org/uniprot/O75223</a> | 0.756694041 |
| O43242 | <a href="https://www.uniprot.org/uniprot/O43242">https://www.uniprot.org/uniprot/O43242</a> | 0.615271567 |
| Q13442 | <a href="https://www.uniprot.org/uniprot/Q13442">https://www.uniprot.org/uniprot/Q13442</a> | 0.623034728 |
| P04080 | <a href="https://www.uniprot.org/uniprot/P04080">https://www.uniprot.org/uniprot/P04080</a> | 0.770977664 |
| P15907 | <a href="https://www.uniprot.org/uniprot/P15907">https://www.uniprot.org/uniprot/P15907</a> | 0.733997889 |
| P07108 | <a href="https://www.uniprot.org/uniprot/P07108">https://www.uniprot.org/uniprot/P07108</a> | 0.727733443 |
| P52888 | <a href="https://www.uniprot.org/uniprot/P52888">https://www.uniprot.org/uniprot/P52888</a> | 0.622283895 |
| Q8NBS9 | <a href="https://www.uniprot.org/uniprot/Q8NBS9">https://www.uniprot.org/uniprot/Q8NBS9</a> | 0.703060157 |
| O75594 | <a href="https://www.uniprot.org/uniprot/O75594">https://www.uniprot.org/uniprot/O75594</a> | 0.635250222 |
| P22061 | <a href="https://www.uniprot.org/uniprot/P22061">https://www.uniprot.org/uniprot/P22061</a> | 0.723423623 |
| O14818 | <a href="https://www.uniprot.org/uniprot/O14818">https://www.uniprot.org/uniprot/O14818</a> | 0.793963594 |
| O00468 | <a href="https://www.uniprot.org/uniprot/O00468">https://www.uniprot.org/uniprot/O00468</a> | 0.788048156 |
| P98095 | <a href="https://www.uniprot.org/uniprot/P98095">https://www.uniprot.org/uniprot/P98095</a> | 0.64833475  |
| P15259 | <a href="https://www.uniprot.org/uniprot/P15259">https://www.uniprot.org/uniprot/P15259</a> | 0.695824103 |
| Q16851 | <a href="https://www.uniprot.org/uniprot/Q16851">https://www.uniprot.org/uniprot/Q16851</a> | 0.645059979 |
| P40121 | <a href="https://www.uniprot.org/uniprot/P40121">https://www.uniprot.org/uniprot/P40121</a> | 0.719552129 |
| Q02818 | <a href="https://www.uniprot.org/uniprot/Q02818">https://www.uniprot.org/uniprot/Q02818</a> | 0.781380357 |
| Q8WWV6 | <a href="https://www.uniprot.org/uniprot/Q8WWV6">https://www.uniprot.org/uniprot/Q8WWV6</a> | 0.618795762 |
| Q9Y5Z4 | <a href="https://www.uniprot.org/uniprot/Q9Y5Z4">https://www.uniprot.org/uniprot/Q9Y5Z4</a> | 0.711916306 |
| Q06323 | <a href="https://www.uniprot.org/uniprot/Q06323">https://www.uniprot.org/uniprot/Q06323</a> | 0.783788055 |
| P02545 | <a href="https://www.uniprot.org/uniprot/P02545">https://www.uniprot.org/uniprot/P02545</a> | 0.750270025 |
| P49773 | <a href="https://www.uniprot.org/uniprot/P49773">https://www.uniprot.org/uniprot/P49773</a> | 0.686902169 |
| P52790 | <a href="https://www.uniprot.org/uniprot/P52790">https://www.uniprot.org/uniprot/P52790</a> | 0.845000604 |
| P00451 | <a href="https://www.uniprot.org/uniprot/P00451">https://www.uniprot.org/uniprot/P00451</a> | 0.624939349 |
| Q9NR99 | <a href="https://www.uniprot.org/uniprot/Q9NR99">https://www.uniprot.org/uniprot/Q9NR99</a> | 0.650671598 |

|        |                                                                                             |             |
|--------|---------------------------------------------------------------------------------------------|-------------|
| P09960 | <a href="https://www.uniprot.org/uniprot/P09960">https://www.uniprot.org/uniprot/P09960</a> | 0.814630169 |
| P02730 | <a href="https://www.uniprot.org/uniprot/P02730">https://www.uniprot.org/uniprot/P02730</a> | 0.717541184 |
| Q06830 | <a href="https://www.uniprot.org/uniprot/Q06830">https://www.uniprot.org/uniprot/Q06830</a> | 0.663615455 |
| P69891 | <a href="https://www.uniprot.org/uniprot/P69891">https://www.uniprot.org/uniprot/P69891</a> | 0.605236387 |
| A6NI73 | <a href="https://www.uniprot.org/uniprot/A6NI73">https://www.uniprot.org/uniprot/A6NI73</a> | 0.651110764 |
| P25788 | <a href="https://www.uniprot.org/uniprot/P25788">https://www.uniprot.org/uniprot/P25788</a> | 0.785862302 |
| Q9H361 | <a href="https://www.uniprot.org/uniprot/Q9H361">https://www.uniprot.org/uniprot/Q9H361</a> | 0.760458296 |
| Q12906 | <a href="https://www.uniprot.org/uniprot/Q12906">https://www.uniprot.org/uniprot/Q12906</a> | 0.618754621 |
| Q4VXU2 | <a href="https://www.uniprot.org/uniprot/Q4VXU2">https://www.uniprot.org/uniprot/Q4VXU2</a> | 0.715610352 |
| P61916 | <a href="https://www.uniprot.org/uniprot/P61916">https://www.uniprot.org/uniprot/P61916</a> | 0.645563702 |
| P63010 | <a href="https://www.uniprot.org/uniprot/P63010">https://www.uniprot.org/uniprot/P63010</a> | 0.659390987 |
| P07306 | <a href="https://www.uniprot.org/uniprot/P07306">https://www.uniprot.org/uniprot/P07306</a> | 0.665685674 |
| Q9NUQ9 | <a href="https://www.uniprot.org/uniprot/Q9NUQ9">https://www.uniprot.org/uniprot/Q9NUQ9</a> | 0.829239619 |
| P06737 | <a href="https://www.uniprot.org/uniprot/P06737">https://www.uniprot.org/uniprot/P06737</a> | 0.751087571 |
| Q12905 | <a href="https://www.uniprot.org/uniprot/Q12905">https://www.uniprot.org/uniprot/Q12905</a> | 0.628902881 |
| O14602 | <a href="https://www.uniprot.org/uniprot/O14602">https://www.uniprot.org/uniprot/O14602</a> | 0.683273548 |
| P13639 | <a href="https://www.uniprot.org/uniprot/P13639">https://www.uniprot.org/uniprot/P13639</a> | 0.843786004 |
| P61981 | <a href="https://www.uniprot.org/uniprot/P61981">https://www.uniprot.org/uniprot/P61981</a> | 0.674721076 |
| P80294 | <a href="https://www.uniprot.org/uniprot/P80294">https://www.uniprot.org/uniprot/P80294</a> | 0.67762907  |
| P03973 | <a href="https://www.uniprot.org/uniprot/P03973">https://www.uniprot.org/uniprot/P03973</a> | 0.746195038 |
| Q14508 | <a href="https://www.uniprot.org/uniprot/Q14508">https://www.uniprot.org/uniprot/Q14508</a> | 0.653018746 |
| P30086 | <a href="https://www.uniprot.org/uniprot/P30086">https://www.uniprot.org/uniprot/P30086</a> | 0.758130738 |
| Q8NHW5 | <a href="https://www.uniprot.org/uniprot/Q8NHW5">https://www.uniprot.org/uniprot/Q8NHW5</a> | 0.790055642 |
| Q13867 | <a href="https://www.uniprot.org/uniprot/Q13867">https://www.uniprot.org/uniprot/Q13867</a> | 0.717831344 |
| Q9UL46 | <a href="https://www.uniprot.org/uniprot/Q9UL46">https://www.uniprot.org/uniprot/Q9UL46</a> | 0.75539559  |
| Q13228 | <a href="https://www.uniprot.org/uniprot/Q13228">https://www.uniprot.org/uniprot/Q13228</a> | 0.603222157 |
| Q15435 | <a href="https://www.uniprot.org/uniprot/Q15435">https://www.uniprot.org/uniprot/Q15435</a> | 0.742304035 |
| P08238 | <a href="https://www.uniprot.org/uniprot/P08238">https://www.uniprot.org/uniprot/P08238</a> | 0.686148961 |
| Q9NP84 | <a href="https://www.uniprot.org/uniprot/Q9NP84">https://www.uniprot.org/uniprot/Q9NP84</a> | 0.681656528 |
| P10599 | <a href="https://www.uniprot.org/uniprot/P10599">https://www.uniprot.org/uniprot/P10599</a> | 0.786085967 |
| P48506 | <a href="https://www.uniprot.org/uniprot/P48506">https://www.uniprot.org/uniprot/P48506</a> | 0.670152681 |
| P11586 | <a href="https://www.uniprot.org/uniprot/P11586">https://www.uniprot.org/uniprot/P11586</a> | 0.612034072 |
| P15153 | <a href="https://www.uniprot.org/uniprot/P15153">https://www.uniprot.org/uniprot/P15153</a> | 0.833603382 |
| P00995 | <a href="https://www.uniprot.org/uniprot/P00995">https://www.uniprot.org/uniprot/P00995</a> | 0.72332499  |
| Q92626 | <a href="https://www.uniprot.org/uniprot/Q92626">https://www.uniprot.org/uniprot/Q92626</a> | 0.743751689 |
| Q13630 | <a href="https://www.uniprot.org/uniprot/Q13630">https://www.uniprot.org/uniprot/Q13630</a> | 0.635029067 |
| Q9Y266 | <a href="https://www.uniprot.org/uniprot/Q9Y266">https://www.uniprot.org/uniprot/Q9Y266</a> | 0.798887125 |
| O60462 | <a href="https://www.uniprot.org/uniprot/O60462">https://www.uniprot.org/uniprot/O60462</a> | 0.640631045 |
| Q14697 | <a href="https://www.uniprot.org/uniprot/Q14697">https://www.uniprot.org/uniprot/Q14697</a> | 0.78318059  |
| P20042 | <a href="https://www.uniprot.org/uniprot/P20042">https://www.uniprot.org/uniprot/P20042</a> | 0.649747686 |
| P35754 | <a href="https://www.uniprot.org/uniprot/P35754">https://www.uniprot.org/uniprot/P35754</a> | 0.800126516 |
| Q9Y5Y6 | <a href="https://www.uniprot.org/uniprot/Q9Y5Y6">https://www.uniprot.org/uniprot/Q9Y5Y6</a> | 0.65505868  |
| P27797 | <a href="https://www.uniprot.org/uniprot/P27797">https://www.uniprot.org/uniprot/P27797</a> | 0.771731828 |
| Q96NZ9 | <a href="https://www.uniprot.org/uniprot/Q96NZ9">https://www.uniprot.org/uniprot/Q96NZ9</a> | 0.601253962 |
| P16157 | <a href="https://www.uniprot.org/uniprot/P16157">https://www.uniprot.org/uniprot/P16157</a> | 0.633971499 |
| Q01638 | <a href="https://www.uniprot.org/uniprot/Q01638">https://www.uniprot.org/uniprot/Q01638</a> | 0.713302436 |
| Q13177 | <a href="https://www.uniprot.org/uniprot/Q13177">https://www.uniprot.org/uniprot/Q13177</a> | 0.624772918 |

|        |                                                                                             |             |
|--------|---------------------------------------------------------------------------------------------|-------------|
| P09382 | <a href="https://www.uniprot.org/uniprot/P09382">https://www.uniprot.org/uniprot/P09382</a> | 0.667246177 |
| P68104 | <a href="https://www.uniprot.org/uniprot/P68104">https://www.uniprot.org/uniprot/P68104</a> | 0.790391821 |
| Q16658 | <a href="https://www.uniprot.org/uniprot/Q16658">https://www.uniprot.org/uniprot/Q16658</a> | 0.665200763 |
| P31949 | <a href="https://www.uniprot.org/uniprot/P31949">https://www.uniprot.org/uniprot/P31949</a> | 0.88475895  |
| Q13200 | <a href="https://www.uniprot.org/uniprot/Q13200">https://www.uniprot.org/uniprot/Q13200</a> | 0.629455712 |
| P07858 | <a href="https://www.uniprot.org/uniprot/P07858">https://www.uniprot.org/uniprot/P07858</a> | 0.618477795 |
| P61978 | <a href="https://www.uniprot.org/uniprot/P61978">https://www.uniprot.org/uniprot/P61978</a> | 0.825352539 |
| O75347 | <a href="https://www.uniprot.org/uniprot/O75347">https://www.uniprot.org/uniprot/O75347</a> | 0.697386778 |
| Q9BRK5 | <a href="https://www.uniprot.org/uniprot/Q9BRK5">https://www.uniprot.org/uniprot/Q9BRK5</a> | 0.717790543 |
| Q10471 | <a href="https://www.uniprot.org/uniprot/Q10471">https://www.uniprot.org/uniprot/Q10471</a> | 0.738567938 |
| Q16531 | <a href="https://www.uniprot.org/uniprot/Q16531">https://www.uniprot.org/uniprot/Q16531</a> | 0.650909323 |
| P39687 | <a href="https://www.uniprot.org/uniprot/P39687">https://www.uniprot.org/uniprot/P39687</a> | 0.850021715 |
| Q13813 | <a href="https://www.uniprot.org/uniprot/Q13813">https://www.uniprot.org/uniprot/Q13813</a> | 0.619384321 |
| Q08174 | <a href="https://www.uniprot.org/uniprot/Q08174">https://www.uniprot.org/uniprot/Q08174</a> | 0.636897162 |
| P13611 | <a href="https://www.uniprot.org/uniprot/P13611">https://www.uniprot.org/uniprot/P13611</a> | 0.724051615 |
| P98153 | <a href="https://www.uniprot.org/uniprot/P98153">https://www.uniprot.org/uniprot/P98153</a> | 0.613935648 |
| O95998 | <a href="https://www.uniprot.org/uniprot/O95998">https://www.uniprot.org/uniprot/O95998</a> | 0.623194939 |
| O95633 | <a href="https://www.uniprot.org/uniprot/O95633">https://www.uniprot.org/uniprot/O95633</a> | 0.624199458 |
| P13489 | <a href="https://www.uniprot.org/uniprot/P13489">https://www.uniprot.org/uniprot/P13489</a> | 0.789004913 |
| P01834 | <a href="https://www.uniprot.org/uniprot/P01834">https://www.uniprot.org/uniprot/P01834</a> | 0.669639026 |
| P51665 | <a href="https://www.uniprot.org/uniprot/P51665">https://www.uniprot.org/uniprot/P51665</a> | 0.707004596 |
| O60664 | <a href="https://www.uniprot.org/uniprot/O60664">https://www.uniprot.org/uniprot/O60664</a> | 0.791108729 |
| P06280 | <a href="https://www.uniprot.org/uniprot/P06280">https://www.uniprot.org/uniprot/P06280</a> | 0.674895749 |
| P50238 | <a href="https://www.uniprot.org/uniprot/P50238">https://www.uniprot.org/uniprot/P50238</a> | 0.663914728 |
| P61769 | <a href="https://www.uniprot.org/uniprot/P61769">https://www.uniprot.org/uniprot/P61769</a> | 0.651460958 |
| P07195 | <a href="https://www.uniprot.org/uniprot/P07195">https://www.uniprot.org/uniprot/P07195</a> | 0.695176465 |
| P05089 | <a href="https://www.uniprot.org/uniprot/P05089">https://www.uniprot.org/uniprot/P05089</a> | 0.708832877 |
| P15121 | <a href="https://www.uniprot.org/uniprot/P15121">https://www.uniprot.org/uniprot/P15121</a> | 0.616598513 |
| P08138 | <a href="https://www.uniprot.org/uniprot/P08138">https://www.uniprot.org/uniprot/P08138</a> | 0.664875656 |
| Q9NRV9 | <a href="https://www.uniprot.org/uniprot/Q9NRV9">https://www.uniprot.org/uniprot/Q9NRV9</a> | 0.788998135 |
| P07910 | <a href="https://www.uniprot.org/uniprot/P07910">https://www.uniprot.org/uniprot/P07910</a> | 0.806804824 |
| P36222 | <a href="https://www.uniprot.org/uniprot/P36222">https://www.uniprot.org/uniprot/P36222</a> | 0.655045005 |
| Q96C86 | <a href="https://www.uniprot.org/uniprot/Q96C86">https://www.uniprot.org/uniprot/Q96C86</a> | 0.687900474 |
| P07988 | <a href="https://www.uniprot.org/uniprot/P07988">https://www.uniprot.org/uniprot/P07988</a> | 0.699334504 |
| O75131 | <a href="https://www.uniprot.org/uniprot/O75131">https://www.uniprot.org/uniprot/O75131</a> | 0.727058108 |
| Q8IZ83 | <a href="https://www.uniprot.org/uniprot/Q8IZ83">https://www.uniprot.org/uniprot/Q8IZ83</a> | 0.788303888 |
| P27105 | <a href="https://www.uniprot.org/uniprot/P27105">https://www.uniprot.org/uniprot/P27105</a> | 0.720468946 |
| Q13308 | <a href="https://www.uniprot.org/uniprot/Q13308">https://www.uniprot.org/uniprot/Q13308</a> | 0.628866313 |
| Q6UXH1 | <a href="https://www.uniprot.org/uniprot/Q6UXH1">https://www.uniprot.org/uniprot/Q6UXH1</a> | 0.752349756 |
| P78417 | <a href="https://www.uniprot.org/uniprot/P78417">https://www.uniprot.org/uniprot/P78417</a> | 0.729390151 |
| P28072 | <a href="https://www.uniprot.org/uniprot/P28072">https://www.uniprot.org/uniprot/P28072</a> | 0.821925636 |
| Q6JBY9 | <a href="https://www.uniprot.org/uniprot/Q6JBY9">https://www.uniprot.org/uniprot/Q6JBY9</a> | 0.785798788 |
| Q9Y315 | <a href="https://www.uniprot.org/uniprot/Q9Y315">https://www.uniprot.org/uniprot/Q9Y315</a> | 0.689412694 |
| Q8NBJ4 | <a href="https://www.uniprot.org/uniprot/Q8NBJ4">https://www.uniprot.org/uniprot/Q8NBJ4</a> | 0.699382091 |
| Q9H173 | <a href="https://www.uniprot.org/uniprot/Q9H173">https://www.uniprot.org/uniprot/Q9H173</a> | 0.722431588 |
| O60506 | <a href="https://www.uniprot.org/uniprot/O60506">https://www.uniprot.org/uniprot/O60506</a> | 0.726807869 |
| Q9NZL9 | <a href="https://www.uniprot.org/uniprot/Q9NZL9">https://www.uniprot.org/uniprot/Q9NZL9</a> | 0.69667276  |

|        |                                                                                             |             |
|--------|---------------------------------------------------------------------------------------------|-------------|
| P18827 | <a href="https://www.uniprot.org/uniprot/P18827">https://www.uniprot.org/uniprot/P18827</a> | 0.730199956 |
| P20827 | <a href="https://www.uniprot.org/uniprot/P20827">https://www.uniprot.org/uniprot/P20827</a> | 0.656947227 |
| P62987 | <a href="https://www.uniprot.org/uniprot/P62987">https://www.uniprot.org/uniprot/P62987</a> | 0.781970623 |
| Q9NY33 | <a href="https://www.uniprot.org/uniprot/Q9NY33">https://www.uniprot.org/uniprot/Q9NY33</a> | 0.762818836 |
| Q13443 | <a href="https://www.uniprot.org/uniprot/Q13443">https://www.uniprot.org/uniprot/Q13443</a> | 0.612125461 |
| P17900 | <a href="https://www.uniprot.org/uniprot/P17900">https://www.uniprot.org/uniprot/P17900</a> | 0.640704294 |
| P43490 | <a href="https://www.uniprot.org/uniprot/P43490">https://www.uniprot.org/uniprot/P43490</a> | 0.820392279 |
| Q15257 | <a href="https://www.uniprot.org/uniprot/Q15257">https://www.uniprot.org/uniprot/Q15257</a> | 0.601434859 |
| Q86X29 | <a href="https://www.uniprot.org/uniprot/Q86X29">https://www.uniprot.org/uniprot/Q86X29</a> | 0.668829564 |
| O14672 | <a href="https://www.uniprot.org/uniprot/O14672">https://www.uniprot.org/uniprot/O14672</a> | 0.664301678 |
| Q01469 | <a href="https://www.uniprot.org/uniprot/Q01469">https://www.uniprot.org/uniprot/Q01469</a> | 0.695924109 |
| O75914 | <a href="https://www.uniprot.org/uniprot/O75914">https://www.uniprot.org/uniprot/O75914</a> | 0.731455374 |
| Q9HC38 | <a href="https://www.uniprot.org/uniprot/Q9HC38">https://www.uniprot.org/uniprot/Q9HC38</a> | 0.727357995 |
| Q99674 | <a href="https://www.uniprot.org/uniprot/Q99674">https://www.uniprot.org/uniprot/Q99674</a> | 0.601708954 |
| P25815 | <a href="https://www.uniprot.org/uniprot/P25815">https://www.uniprot.org/uniprot/P25815</a> | 0.798284445 |
| P00492 | <a href="https://www.uniprot.org/uniprot/P00492">https://www.uniprot.org/uniprot/P00492</a> | 0.75955418  |
| Q9NR34 | <a href="https://www.uniprot.org/uniprot/Q9NR34">https://www.uniprot.org/uniprot/Q9NR34</a> | 0.619223159 |
| Q92598 | <a href="https://www.uniprot.org/uniprot/Q92598">https://www.uniprot.org/uniprot/Q92598</a> | 0.653606542 |
| P63208 | <a href="https://www.uniprot.org/uniprot/P63208">https://www.uniprot.org/uniprot/P63208</a> | 0.782839697 |
| P07451 | <a href="https://www.uniprot.org/uniprot/P07451">https://www.uniprot.org/uniprot/P07451</a> | 0.603100052 |
| P02763 | <a href="https://www.uniprot.org/uniprot/P02763">https://www.uniprot.org/uniprot/P02763</a> | 0.749420828 |
| Q9UKK9 | <a href="https://www.uniprot.org/uniprot/Q9UKK9">https://www.uniprot.org/uniprot/Q9UKK9</a> | 0.721754684 |
| Q9BRT3 | <a href="https://www.uniprot.org/uniprot/Q9BRT3">https://www.uniprot.org/uniprot/Q9BRT3</a> | 0.702019537 |
| Q9BXD5 | <a href="https://www.uniprot.org/uniprot/Q9BXD5">https://www.uniprot.org/uniprot/Q9BXD5</a> | 0.621504387 |
| Q8N257 | <a href="https://www.uniprot.org/uniprot/Q8N257">https://www.uniprot.org/uniprot/Q8N257</a> | 0.763069683 |
| Q15631 | <a href="https://www.uniprot.org/uniprot/Q15631">https://www.uniprot.org/uniprot/Q15631</a> | 0.819628314 |
| Q13217 | <a href="https://www.uniprot.org/uniprot/Q13217">https://www.uniprot.org/uniprot/Q13217</a> | 0.719962899 |
| P06454 | <a href="https://www.uniprot.org/uniprot/P06454">https://www.uniprot.org/uniprot/P06454</a> | 0.865976042 |
| Q16881 | <a href="https://www.uniprot.org/uniprot/Q16881">https://www.uniprot.org/uniprot/Q16881</a> | 0.701881099 |
| Q9Y624 | <a href="https://www.uniprot.org/uniprot/Q9Y624">https://www.uniprot.org/uniprot/Q9Y624</a> | 0.803186487 |
| P28070 | <a href="https://www.uniprot.org/uniprot/P28070">https://www.uniprot.org/uniprot/P28070</a> | 0.801440986 |
| Q14103 | <a href="https://www.uniprot.org/uniprot/Q14103">https://www.uniprot.org/uniprot/Q14103</a> | 0.769266925 |
| Q92743 | <a href="https://www.uniprot.org/uniprot/Q92743">https://www.uniprot.org/uniprot/Q92743</a> | 0.733124935 |
| P62826 | <a href="https://www.uniprot.org/uniprot/P62826">https://www.uniprot.org/uniprot/P62826</a> | 0.688077584 |
| P01857 | <a href="https://www.uniprot.org/uniprot/P01857">https://www.uniprot.org/uniprot/P01857</a> | 0.642443755 |
| P28062 | <a href="https://www.uniprot.org/uniprot/P28062">https://www.uniprot.org/uniprot/P28062</a> | 0.770206188 |
| Q9GZP4 | <a href="https://www.uniprot.org/uniprot/Q9GZP4">https://www.uniprot.org/uniprot/Q9GZP4</a> | 0.631781469 |
| Q9ULC4 | <a href="https://www.uniprot.org/uniprot/Q9ULC4">https://www.uniprot.org/uniprot/Q9ULC4</a> | 0.673500964 |
| O00264 | <a href="https://www.uniprot.org/uniprot/O00264">https://www.uniprot.org/uniprot/O00264</a> | 0.607970054 |
| Q7Z5L0 | <a href="https://www.uniprot.org/uniprot/Q7Z5L0">https://www.uniprot.org/uniprot/Q7Z5L0</a> | 0.681220682 |
| Q86X76 | <a href="https://www.uniprot.org/uniprot/Q86X76">https://www.uniprot.org/uniprot/Q86X76</a> | 0.632589941 |
| P08311 | <a href="https://www.uniprot.org/uniprot/P08311">https://www.uniprot.org/uniprot/P08311</a> | 0.858982831 |
| P01876 | <a href="https://www.uniprot.org/uniprot/P01876">https://www.uniprot.org/uniprot/P01876</a> | 0.771883138 |
| P30520 | <a href="https://www.uniprot.org/uniprot/P30520">https://www.uniprot.org/uniprot/P30520</a> | 0.745140226 |
| O60568 | <a href="https://www.uniprot.org/uniprot/O60568">https://www.uniprot.org/uniprot/O60568</a> | 0.632292258 |
| O00233 | <a href="https://www.uniprot.org/uniprot/O00233">https://www.uniprot.org/uniprot/O00233</a> | 0.661014934 |
| Q9Y6Y9 | <a href="https://www.uniprot.org/uniprot/Q9Y6Y9">https://www.uniprot.org/uniprot/Q9Y6Y9</a> | 0.613219522 |



|        |                                                                                             |             |
|--------|---------------------------------------------------------------------------------------------|-------------|
| P46926 | <a href="https://www.uniprot.org/uniprot/P46926">https://www.uniprot.org/uniprot/P46926</a> | 0.735025546 |
| P21810 | <a href="https://www.uniprot.org/uniprot/P21810">https://www.uniprot.org/uniprot/P21810</a> | 0.672676195 |
| Q8NCW5 | <a href="https://www.uniprot.org/uniprot/Q8NCW5">https://www.uniprot.org/uniprot/Q8NCW5</a> | 0.687564085 |
| O95394 | <a href="https://www.uniprot.org/uniprot/O95394">https://www.uniprot.org/uniprot/O95394</a> | 0.600350877 |
| P14550 | <a href="https://www.uniprot.org/uniprot/P14550">https://www.uniprot.org/uniprot/P14550</a> | 0.638386732 |
| P28066 | <a href="https://www.uniprot.org/uniprot/P28066">https://www.uniprot.org/uniprot/P28066</a> | 0.795397992 |
| Q13616 | <a href="https://www.uniprot.org/uniprot/Q13616">https://www.uniprot.org/uniprot/Q13616</a> | 0.671298538 |
| O15067 | <a href="https://www.uniprot.org/uniprot/O15067">https://www.uniprot.org/uniprot/O15067</a> | 0.71596756  |
| Q99536 | <a href="https://www.uniprot.org/uniprot/Q99536">https://www.uniprot.org/uniprot/Q99536</a> | 0.786074887 |
| P49327 | <a href="https://www.uniprot.org/uniprot/P49327">https://www.uniprot.org/uniprot/P49327</a> | 0.673887109 |
| P62333 | <a href="https://www.uniprot.org/uniprot/P62333">https://www.uniprot.org/uniprot/P62333</a> | 0.615959516 |
| Q13162 | <a href="https://www.uniprot.org/uniprot/Q13162">https://www.uniprot.org/uniprot/Q13162</a> | 0.686741801 |
| P31153 | <a href="https://www.uniprot.org/uniprot/P31153">https://www.uniprot.org/uniprot/P31153</a> | 0.712044925 |
| P54727 | <a href="https://www.uniprot.org/uniprot/P54727">https://www.uniprot.org/uniprot/P54727</a> | 0.645380013 |
| Q05639 | <a href="https://www.uniprot.org/uniprot/Q05639">https://www.uniprot.org/uniprot/Q05639</a> | 0.843328698 |
| P30046 | <a href="https://www.uniprot.org/uniprot/P30046">https://www.uniprot.org/uniprot/P30046</a> | 0.853496731 |
| P05387 | <a href="https://www.uniprot.org/uniprot/P05387">https://www.uniprot.org/uniprot/P05387</a> | 0.862579409 |
| P54725 | <a href="https://www.uniprot.org/uniprot/P54725">https://www.uniprot.org/uniprot/P54725</a> | 0.750410491 |
| P61019 | <a href="https://www.uniprot.org/uniprot/P61019">https://www.uniprot.org/uniprot/P61019</a> | 0.624661109 |
| P12956 | <a href="https://www.uniprot.org/uniprot/P12956">https://www.uniprot.org/uniprot/P12956</a> | 0.761338566 |
| Q14116 | <a href="https://www.uniprot.org/uniprot/Q14116">https://www.uniprot.org/uniprot/Q14116</a> | 0.683504008 |
| O15400 | <a href="https://www.uniprot.org/uniprot/O15400">https://www.uniprot.org/uniprot/O15400</a> | 0.707219605 |
| P48507 | <a href="https://www.uniprot.org/uniprot/P48507">https://www.uniprot.org/uniprot/P48507</a> | 0.638370407 |
| O95336 | <a href="https://www.uniprot.org/uniprot/O95336">https://www.uniprot.org/uniprot/O95336</a> | 0.701424653 |
| P80188 | <a href="https://www.uniprot.org/uniprot/P80188">https://www.uniprot.org/uniprot/P80188</a> | 0.760372384 |
| P14649 | <a href="https://www.uniprot.org/uniprot/P14649">https://www.uniprot.org/uniprot/P14649</a> | 0.816281201 |
| Q9ULZ3 | <a href="https://www.uniprot.org/uniprot/Q9ULZ3">https://www.uniprot.org/uniprot/Q9ULZ3</a> | 0.865894831 |
| Q53FA7 | <a href="https://www.uniprot.org/uniprot/Q53FA7">https://www.uniprot.org/uniprot/Q53FA7</a> | 0.803909843 |
| Q9HA64 | <a href="https://www.uniprot.org/uniprot/Q9HA64">https://www.uniprot.org/uniprot/Q9HA64</a> | 0.609071828 |
| Q9Y3I1 | <a href="https://www.uniprot.org/uniprot/Q9Y3I1">https://www.uniprot.org/uniprot/Q9Y3I1</a> | 0.606062589 |
| P28074 | <a href="https://www.uniprot.org/uniprot/P28074">https://www.uniprot.org/uniprot/P28074</a> | 0.720016396 |
| A6NI72 | <a href="https://www.uniprot.org/uniprot/A6NI72">https://www.uniprot.org/uniprot/A6NI72</a> | 0.852281366 |
| Q9GZN8 | <a href="https://www.uniprot.org/uniprot/Q9GZN8">https://www.uniprot.org/uniprot/Q9GZN8</a> | 0.705905765 |
| P07738 | <a href="https://www.uniprot.org/uniprot/P07738">https://www.uniprot.org/uniprot/P07738</a> | 0.643240803 |
| Q9Y2V2 | <a href="https://www.uniprot.org/uniprot/Q9Y2V2">https://www.uniprot.org/uniprot/Q9Y2V2</a> | 0.759232581 |
| Q10589 | <a href="https://www.uniprot.org/uniprot/Q10589">https://www.uniprot.org/uniprot/Q10589</a> | 0.644233232 |
| P05787 | <a href="https://www.uniprot.org/uniprot/P05787">https://www.uniprot.org/uniprot/P05787</a> | 0.665309038 |
| Q15904 | <a href="https://www.uniprot.org/uniprot/Q15904">https://www.uniprot.org/uniprot/Q15904</a> | 0.696472942 |
| O43583 | <a href="https://www.uniprot.org/uniprot/O43583">https://www.uniprot.org/uniprot/O43583</a> | 0.638075556 |
| Q6XQN6 | <a href="https://www.uniprot.org/uniprot/Q6XQN6">https://www.uniprot.org/uniprot/Q6XQN6</a> | 0.673602181 |
| P20340 | <a href="https://www.uniprot.org/uniprot/P20340">https://www.uniprot.org/uniprot/P20340</a> | 0.63845793  |
| P35052 | <a href="https://www.uniprot.org/uniprot/P35052">https://www.uniprot.org/uniprot/P35052</a> | 0.617890378 |
| Q92692 | <a href="https://www.uniprot.org/uniprot/Q92692">https://www.uniprot.org/uniprot/Q92692</a> | 0.702121439 |
| P49721 | <a href="https://www.uniprot.org/uniprot/P49721">https://www.uniprot.org/uniprot/P49721</a> | 0.808445279 |
| P49720 | <a href="https://www.uniprot.org/uniprot/P49720">https://www.uniprot.org/uniprot/P49720</a> | 0.794014591 |
| P59665 | <a href="https://www.uniprot.org/uniprot/P59665">https://www.uniprot.org/uniprot/P59665</a> | 0.79513905  |
| P01714 | <a href="https://www.uniprot.org/uniprot/P01714">https://www.uniprot.org/uniprot/P01714</a> | 0.71805358  |

|        |                                                                                             |              |
|--------|---------------------------------------------------------------------------------------------|--------------|
| Q9BYF1 | <a href="https://www.uniprot.org/uniprot/Q9BYF1">https://www.uniprot.org/uniprot/Q9BYF1</a> | 0.720579407  |
| Q9BUD6 | <a href="https://www.uniprot.org/uniprot/Q9BUD6">https://www.uniprot.org/uniprot/Q9BUD6</a> | 0.721758049  |
| P01040 | <a href="https://www.uniprot.org/uniprot/P01040">https://www.uniprot.org/uniprot/P01040</a> | 0.663948357  |
| O43768 | <a href="https://www.uniprot.org/uniprot/O43768">https://www.uniprot.org/uniprot/O43768</a> | 0.660633154  |
| Q9NRX4 | <a href="https://www.uniprot.org/uniprot/Q9NRX4">https://www.uniprot.org/uniprot/Q9NRX4</a> | 0.762781059  |
| P15941 | <a href="https://www.uniprot.org/uniprot/P15941">https://www.uniprot.org/uniprot/P15941</a> | 0.647359555  |
| Q7L5N1 | <a href="https://www.uniprot.org/uniprot/Q7L5N1">https://www.uniprot.org/uniprot/Q7L5N1</a> | 0.668374737  |
| Q8N339 | <a href="https://www.uniprot.org/uniprot/Q8N339">https://www.uniprot.org/uniprot/Q8N339</a> | 0.697872099  |
| Q9NZD4 | <a href="https://www.uniprot.org/uniprot/Q9NZD4">https://www.uniprot.org/uniprot/Q9NZD4</a> | 0.613851719  |
| Q9BRA2 | <a href="https://www.uniprot.org/uniprot/Q9BRA2">https://www.uniprot.org/uniprot/Q9BRA2</a> | 0.711480914  |
| Q969H8 | <a href="https://www.uniprot.org/uniprot/Q969H8">https://www.uniprot.org/uniprot/Q969H8</a> | 0.71654806   |
| P61956 | <a href="https://www.uniprot.org/uniprot/P61956">https://www.uniprot.org/uniprot/P61956</a> | 0.644932756  |
| P26022 | <a href="https://www.uniprot.org/uniprot/P26022">https://www.uniprot.org/uniprot/P26022</a> | 0.69311028   |
| Q9H3K6 | <a href="https://www.uniprot.org/uniprot/Q9H3K6">https://www.uniprot.org/uniprot/Q9H3K6</a> | 0.703815073  |
| P61960 | <a href="https://www.uniprot.org/uniprot/P61960">https://www.uniprot.org/uniprot/P61960</a> | 0.695981137  |
| Q9Y6C2 | <a href="https://www.uniprot.org/uniprot/Q9Y6C2">https://www.uniprot.org/uniprot/Q9Y6C2</a> | 0.627662486  |
| Q9UGN4 | <a href="https://www.uniprot.org/uniprot/Q9UGN4">https://www.uniprot.org/uniprot/Q9UGN4</a> | 0.636194445  |
| Q15366 | <a href="https://www.uniprot.org/uniprot/Q15366">https://www.uniprot.org/uniprot/Q15366</a> | 0.657711599  |
| Q8N0Y7 | <a href="https://www.uniprot.org/uniprot/Q8N0Y7">https://www.uniprot.org/uniprot/Q8N0Y7</a> | 0.783859006  |
| Q0VD83 | <a href="https://www.uniprot.org/uniprot/Q0VD83">https://www.uniprot.org/uniprot/Q0VD83</a> | 0.859209897  |
| P28065 | <a href="https://www.uniprot.org/uniprot/P28065">https://www.uniprot.org/uniprot/P28065</a> | 0.720210275  |
| Q9UGM3 | <a href="https://www.uniprot.org/uniprot/Q9UGM3">https://www.uniprot.org/uniprot/Q9UGM3</a> | 0.669636509  |
| O94766 | <a href="https://www.uniprot.org/uniprot/O94766">https://www.uniprot.org/uniprot/O94766</a> | 0.668513746  |
| P18669 | <a href="https://www.uniprot.org/uniprot/P18669">https://www.uniprot.org/uniprot/P18669</a> | 0.711038914  |
| O95757 | <a href="https://www.uniprot.org/uniprot/O95757">https://www.uniprot.org/uniprot/O95757</a> | 0.799694829  |
| P61026 | <a href="https://www.uniprot.org/uniprot/P61026">https://www.uniprot.org/uniprot/P61026</a> | 0.719862103  |
| P35318 | <a href="https://www.uniprot.org/uniprot/P35318">https://www.uniprot.org/uniprot/P35318</a> | 0.715675821  |
| A8MUU1 | <a href="https://www.uniprot.org/uniprot/A8MUU1">https://www.uniprot.org/uniprot/A8MUU1</a> | 0.678150647  |
| Q6ZMR3 | <a href="https://www.uniprot.org/uniprot/Q6ZMR3">https://www.uniprot.org/uniprot/Q6ZMR3</a> | 0.645773022  |
| O75882 | <a href="https://www.uniprot.org/uniprot/O75882">https://www.uniprot.org/uniprot/O75882</a> | -0.659858961 |
| P02765 | <a href="https://www.uniprot.org/uniprot/P02765">https://www.uniprot.org/uniprot/P02765</a> | -0.617346155 |
| P01008 | <a href="https://www.uniprot.org/uniprot/P01008">https://www.uniprot.org/uniprot/P01008</a> | -0.666697339 |
| P00734 | <a href="https://www.uniprot.org/uniprot/P00734">https://www.uniprot.org/uniprot/P00734</a> | -0.708108656 |
| P03952 | <a href="https://www.uniprot.org/uniprot/P03952">https://www.uniprot.org/uniprot/P03952</a> | -0.693444911 |
| P06396 | <a href="https://www.uniprot.org/uniprot/P06396">https://www.uniprot.org/uniprot/P06396</a> | -0.71627292  |
| P19827 | <a href="https://www.uniprot.org/uniprot/P19827">https://www.uniprot.org/uniprot/P19827</a> | -0.722990599 |
| Q96PD5 | <a href="https://www.uniprot.org/uniprot/Q96PD5">https://www.uniprot.org/uniprot/Q96PD5</a> | -0.722746601 |
| P35858 | <a href="https://www.uniprot.org/uniprot/P35858">https://www.uniprot.org/uniprot/P35858</a> | -0.648599681 |
| P19823 | <a href="https://www.uniprot.org/uniprot/P19823">https://www.uniprot.org/uniprot/P19823</a> | -0.711987021 |
| P43652 | <a href="https://www.uniprot.org/uniprot/P43652">https://www.uniprot.org/uniprot/P43652</a> | -0.628269694 |
| P55290 | <a href="https://www.uniprot.org/uniprot/P55290">https://www.uniprot.org/uniprot/P55290</a> | -0.676283516 |
| P02790 | <a href="https://www.uniprot.org/uniprot/P02790">https://www.uniprot.org/uniprot/P02790</a> | -0.678288707 |
| P17936 | <a href="https://www.uniprot.org/uniprot/P17936">https://www.uniprot.org/uniprot/P17936</a> | -0.692204038 |
| O14793 | <a href="https://www.uniprot.org/uniprot/O14793">https://www.uniprot.org/uniprot/O14793</a> | -0.610419332 |
| P29622 | <a href="https://www.uniprot.org/uniprot/P29622">https://www.uniprot.org/uniprot/P29622</a> | -0.759938045 |
| P06276 | <a href="https://www.uniprot.org/uniprot/P06276">https://www.uniprot.org/uniprot/P06276</a> | -0.665540769 |
| P43251 | <a href="https://www.uniprot.org/uniprot/P43251">https://www.uniprot.org/uniprot/P43251</a> | -0.679348744 |

|        |                                                                                             |              |
|--------|---------------------------------------------------------------------------------------------|--------------|
| P54289 | <a href="https://www.uniprot.org/uniprot/P54289">https://www.uniprot.org/uniprot/P54289</a> | -0.637604299 |
| P05452 | <a href="https://www.uniprot.org/uniprot/P05452">https://www.uniprot.org/uniprot/P05452</a> | -0.702117454 |
| P27918 | <a href="https://www.uniprot.org/uniprot/P27918">https://www.uniprot.org/uniprot/P27918</a> | -0.614091681 |
| Q12860 | <a href="https://www.uniprot.org/uniprot/Q12860">https://www.uniprot.org/uniprot/Q12860</a> | -0.63492054  |
| Q76LX8 | <a href="https://www.uniprot.org/uniprot/Q76LX8">https://www.uniprot.org/uniprot/Q76LX8</a> | -0.643813892 |
| P49908 | <a href="https://www.uniprot.org/uniprot/P49908">https://www.uniprot.org/uniprot/P49908</a> | -0.645291133 |
| P00533 | <a href="https://www.uniprot.org/uniprot/P00533">https://www.uniprot.org/uniprot/P00533</a> | -0.643473616 |
| Q9UBQ6 | <a href="https://www.uniprot.org/uniprot/Q9UBQ6">https://www.uniprot.org/uniprot/Q9UBQ6</a> | -0.605808746 |
| O15335 | <a href="https://www.uniprot.org/uniprot/O15335">https://www.uniprot.org/uniprot/O15335</a> | -0.668053383 |
| Q12913 | <a href="https://www.uniprot.org/uniprot/Q12913">https://www.uniprot.org/uniprot/Q12913</a> | -0.641679392 |
| Q16832 | <a href="https://www.uniprot.org/uniprot/Q16832">https://www.uniprot.org/uniprot/Q16832</a> | -0.635131472 |
| Q8NFT8 | <a href="https://www.uniprot.org/uniprot/Q8NFT8">https://www.uniprot.org/uniprot/Q8NFT8</a> | -0.625062185 |
| Q16620 | <a href="https://www.uniprot.org/uniprot/Q16620">https://www.uniprot.org/uniprot/Q16620</a> | -0.703619993 |
| O75144 | <a href="https://www.uniprot.org/uniprot/O75144">https://www.uniprot.org/uniprot/O75144</a> | -0.617410449 |
